# Supplementary material for: Hedgehog regulation of epithelial cell state and morphogenesis in the larynx
Source: eLife journal article supplement (doi:10.7554/elife.77055), 2022-11-18
Supplement: supp [file elife_poa_e77055_Figure_2_source_data_1.xlsx]

## Sheet: Read me
		GEO Accession: GSE190281
		Sample collection
		Vocal fold tissue was dissected from two sets of 3-pooled control and Shh-/- embryos at E10.5 (32-35s), RNA was extracted using Trizol and DNAse treated.
		Sequencing & analysis
		Libraries were generated using the NEBNext Ultra II Directional RNA library prep kit and single-end sequenced on the Illumina NextSeq 500 platform for ~40,000,000 reads/sample. Sequenced reads were aligned to the mm10 genome using HISAT2 v2.1.0 and assembled into genes using StringTie v1.3.6 (Pertea et al., 2016, 2015).
		For all genes detected by RNAseq refer to "All genes detected by RNAseq"
		For differentially expressed genes with adjusted p-value (padj)<0.05 refer to "DEGs (padj<0.05)

## Sheet: All genes detected by RNAseq
gene_id	gene_name	baseMean	log2FoldChange	lfcSE	stat	pvalue	padj	TPM.Shh1	TPM.Shh2	TPM.WT4	TPM.WT6
ENSMUSG00000006057.15	Atp5g1	2167.32	-2.3086	0.160058	-14.4235	3.68e-47	6.55e-43	122.443	117.625	23.7133	20.9281
ENSMUSG00000021466.11	Ptch1	3992.91	2.19035	0.156769	13.9718	2.32e-44	2.06e-40	12.9276	13.8412	57.7523	55.0726
ENSMUSG00000026344.9	Lypd1	289.564	-5.2961	0.40568	-13.0549	5.96e-39	3.53e-35	6.00712	6.22428	0.203084	0.089529
ENSMUSG00000047423.9	AI837181	354.523	7.50844	0.612603	12.2566	1.55e-34	6.88e-31	0.374602	0.050337	28.9758	25.6888
ENSMUSG00000024987.5	Cyp26a1	454.493	-3.52182	0.301283	-11.6894	1.44e-31	5.13e-28	36.979	24.1552	2.49899	2.35073
ENSMUSG00000027500.10	Stmn2	1781.4	-2.24989	0.193681	-11.6164	3.4e-31	1.01e-27	89.0678	103.199	18.1956	19.1028
ENSMUSG00000097336.8	Fendrr	734.26	4.956	0.428152	11.5753	5.5e-31	1.4e-27	0.668438	2.13279	52.3267	35.8223
ENSMUSG00000030905.5	Crym	689.871	-3.16179	0.273985	-11.54	8.29e-31	1.84e-27	69.6073	46.0776	6.52102	5.3085
ENSMUSG00000010476.13	Ebf3	2201.56	-1.8423	0.160772	-11.4591	2.12e-30	4.18e-27	47.8301	41.7877	11.9758	10.9928
ENSMUSG00000040310.12	Alx4	630.231	-4.57159	0.400658	-11.4102	3.72e-30	6.61e-27	16.7453	10.8397	0.765684	0.312293
ENSMUSG00000022053.13	Ebf2	497.037	-2.66869	0.234222	-11.3939	4.49e-30	7.25e-27	15.5239	13.3854	2.23169	1.93548
ENSMUSG00000078190.6	Dnm3os	1104.57	-4.36502	0.385343	-11.3276	9.58e-30	1.42e-26	19.6698	14.7026	0.447035	1.07219
ENSMUSG00000010607.8	Pigyl	198.243	-6.65215	0.588411	-11.3053	1.24e-29	1.69e-26	32.7669	39.7978	0.390094	0.301503
ENSMUSG00000025359.9	Pmel	275.606	-4.66412	0.427184	-10.9183	9.43e-28	1.2e-24	19.0393	13.1781	0.35877	0.777421
ENSMUSG00000051367.8	Six1	1290.05	-2.76813	0.254614	-10.8719	1.57e-27	1.86e-24	55.4805	45.7549	8.38585	5.30673
ENSMUSG00000059173.19	Pde1a	286.248	4.07977	0.391804	10.4128	2.17e-25	2.41e-22	0.721313	0.585351	12.9193	7.37887
ENSMUSG00000040274.11	Cdk6	1367.38	1.97457	0.190521	10.3641	3.61e-25	3.78e-22	4.90169	5.48057	19.8431	17.6964
ENSMUSG00000053093.15	Myh7	793.76	-2.39669	0.2328	-10.2951	7.42e-25	7.33e-22	16.7906	12.5558	2.7904	2.32355
ENSMUSG00000028519.16	Dab1	291.571	-2.85111	0.279823	-10.189	2.22e-24	2.08e-21	11.2824	11.3092	1.40183	1.49606
ENSMUSG00000064080.12	Fbln2	1244.11	-1.92012	0.190372	-10.0862	6.36e-24	5.65e-21	67.1857	54.5397	15.5487	13.9765
ENSMUSG00000038530.11	Rgs4	1251.14	-2.66482	0.26513	-10.051	9.09e-24	7.7e-21	48.0543	46.6534	8.66242	5.15682
ENSMUSG00000064325.3	Hhip	313.421	5.32853	0.53318	9.99388	1.62e-23	1.31e-20	0.149252	0.6348	11.2538	15.2467
ENSMUSG00000062380.3	Tubb3	3277.32	-2.60544	0.267943	-9.72384	2.39e-22	1.84e-19	184.331	203.397	37.5996	21.501
ENSMUSG00000001280.12	Sp1	1713.95	2.00378	0.211213	9.487	2.38e-21	1.76e-18	12.9226	15.3841	49.6492	55.9235
ENSMUSG00000089726.2	Mir17hg	2496.5	1.51509	0.161638	9.37333	7.03e-21	5e-18	22.8261	24.2378	63.0573	61.0794
ENSMUSG00000022055.7	Nefl	4323.01	-2.43064	0.262706	-9.2523	2.2e-20	1.5e-17	127.158	150.177	29.9384	17.791
ENSMUSG00000053930.13	Shisa6	170.88	-3.66966	0.402294	-9.12185	7.38e-20	4.86e-17	3.47347	2.56359	0.261404	0.173603
ENSMUSG00000035799.5	Twist1	2314.88	-1.47404	0.161975	-9.10043	9e-20	5.71e-17	146.981	125.029	46.0909	43.831
ENSMUSG00000052957.7	Gas1	4356.6	-1.78687	0.19739	-9.05248	1.4e-19	8.57e-17	158.284	136.228	45.536	33.1139
ENSMUSG00000029005.4	Draxin	978.616	-2.06598	0.228941	-9.02407	1.81e-19	1.07e-16	21.9658	17.3085	4.9193	3.69962
ENSMUSG00000040752.15	Myh6	423.703	-2.15861	0.240476	-8.97642	2.8e-19	1.6e-16	8.1014	7.59446	1.54358	1.69275
ENSMUSG00000055254.14	Ntrk2	740.62	-2.18211	0.244346	-8.9304	4.24e-19	2.36e-16	9.73422	12.104	2.1011	2.34784
ENSMUSG00000044338.9	Aplnr	1586.33	-1.6087	0.180431	-8.91584	4.84e-19	2.61e-16	39.5875	43.4878	13.203	11.9533
ENSMUSG00000034336.3	Ina	534.089	-2.47535	0.278109	-8.90062	5.55e-19	2.9e-16	16.3135	19.5805	3.52226	2.46192
ENSMUSG00000025215.10	Tlx1	167.717	-4.02599	0.453061	-8.8862	6.32e-19	3.21e-16	9.96664	9.90395	0.802906	0.337438
ENSMUSG00000038248.8	Sobp	708.812	-1.94603	0.219547	-8.86385	7.73e-19	3.82e-16	16.8446	13.6467	3.94518	3.31637
ENSMUSG00000033227.7	Wnt6	317.973	-2.47411	0.282401	-8.76097	1.94e-18	9.3e-16	20.5422	15.7329	3.13203	2.84167
ENSMUSG00000051920.6	Rspo2	1054.39	1.66664	0.1907	8.73957	2.34e-18	1.09e-15	10.7519	8.91118	29.9672	27.2472
ENSMUSG00000035566.6	Pcdh17	493.418	-1.98978	0.229261	-8.67911	3.99e-18	1.82e-15	5.18296	5.48869	1.31204	1.1685
ENSMUSG00000061524.8	Zic2	117.791	-6.6628	0.77189	-8.6318	6.04e-18	2.68e-15	8.88714	6.29785	0.112039	0.041388
ENSMUSG00000020950.10	Foxg1	869.626	1.64265	0.190531	8.62142	6.61e-18	2.87e-15	7.00073	6.89757	21.0962	18.9155
ENSMUSG00000091462.1	Gm17084	119.837	-3.91567	0.456086	-8.58539	9.05e-18	3.83e-15	15.3831	13.5857	0.715224	1.04667
ENSMUSG00000000296.7	Tpd52l1	352.502	2.17244	0.256029	8.48511	2.16e-17	8.71e-15	6.42953	6.56423	27.423	26.6305
ENSMUSG00000027338.16	Prnd	96.003	4.61515	0.543808	8.48674	2.13e-17	8.71e-15	0.175131	0.191794	4.57947	4.09569
ENSMUSG00000057098.14	Ebf1	891.708	-1.62921	0.192664	-8.45623	2.76e-17	1.09e-14	19.9275	19.2542	6.31456	5.3542
ENSMUSG00000048540.8	Nhlh2	738.032	-3.77375	0.44999	-8.38629	5.02e-17	1.94e-14	26.4958	28.6947	2.88625	0.884067
ENSMUSG00000025216.9	Lbx1	99.8727	-4.69493	0.564262	-8.32049	8.76e-17	3.31e-14	6.07643	3.97841	0.191145	0.162078
ENSMUSG00000003410.7	Elavl3	632.716	-2.35065	0.283948	-8.27843	1.25e-16	4.62e-14	14.1938	12.9577	3.06964	1.85035
ENSMUSG00000044155.11	Lsm8	2739.34	-1.24411	0.150454	-8.26903	1.35e-16	4.9e-14	162.828	161.052	65.2555	60.7274
ENSMUSG00000027832.5	Ptx3	1231.87	-1.8994	0.230586	-8.23728	1.76e-16	6.26e-14	64.0424	69.8639	19.5153	13.7191
ENSMUSG00000097084.1	Foxl1	193.619	3.51072	0.427603	8.21023	2.21e-16	7.69e-14	0.461815	0.940872	8.42893	7.25718
ENSMUSG00000022054.11	Nefm	7129.46	-2.51494	0.308187	-8.16043	3.34e-16	1.14e-13	221.828	246.421	51.3282	24.7677
ENSMUSG00000059049.14	Frem1	2419.88	1.46847	0.181594	8.0866	6.14e-16	2.06e-13	10.7406	11.4683	26.6446	29.9788
ENSMUSG00000028261.13	Ndufaf4	731.959	-1.62692	0.20136	-8.07965	6.5e-16	2.14e-13	30.1391	31.506	9.15953	9.23079
ENSMUSG00000091695.1	Gm17669	432.62	-2.40977	0.301007	-8.00571	1.19e-15	3.84e-13	82.5632	118.122	17.6155	17.4479
ENSMUSG00000048758.13	Rpl29	1680.27	-1.85762	0.233446	-7.95739	1.76e-15	5.58e-13	194.358	266.478	59.8467	57.8591
ENSMUSG00000004415.15	Col26a1	5553.88	-1.30095	0.163718	-7.94628	1.92e-15	5.99e-13	212.364	196.241	84.5219	68.3178
ENSMUSG00000040260.7	Daam2	1457.02	-1.86173	0.235676	-7.89954	2.8e-15	8.58e-13	28.1923	20.7257	7.14651	5.21992
ENSMUSG00000020000.7	Moxd1	1975.15	1.56165	0.197978	7.88798	3.07e-15	9.25e-13	21.9307	20.1997	51.3235	62.7622
ENSMUSG00000027750.16	Postn	2316.52	-2.22563	0.282969	-7.86528	3.68e-15	1.09e-12	118.765	67.7584	16.2382	20.0735
ENSMUSG00000033740.17	St18	317.768	-3.42787	0.437194	-7.8406	4.48e-15	1.31e-12	7.15892	8.45784	0.977877	0.375359
ENSMUSG00000000120.6	Ngfr	1291.89	-1.71002	0.218877	-7.81267	5.6e-15	1.61e-12	38.531	35.5248	12.2349	8.66389
ENSMUSG00000051022.7	Hs3st1	170.889	-2.65762	0.341624	-7.77938	7.29e-15	2.06e-12	11.9324	11.3118	1.83925	1.55294
ENSMUSG00000057777.4	Mab21l2	888.348	-2.61009	0.337474	-7.73421	1.04e-14	2.89e-12	47.8181	26.5263	6.88215	4.28363
ENSMUSG00000005220.10	Corin	499.318	-2.75391	0.35631	-7.72896	1.08e-14	2.92e-12	17.866	11.3913	1.49253	2.47248
ENSMUSG00000042607.15	Asb4	4095.16	-1.14815	0.148554	-7.72884	1.09e-14	2.92e-12	114.175	108.87	45.3387	47.2123
ENSMUSG00000074622.4	Mafb	646.829	-1.61859	0.210361	-7.69437	1.42e-14	3.77e-12	18.9303	18.4429	5.33973	5.85402
ENSMUSG00000107591.1	RP23-252F4.4	76.9721	-5.62824	0.732086	-7.68795	1.5e-14	3.91e-12	23.7649	18.9235	0.244472	0.519298
ENSMUSG00000073889.10	Il11ra1	782.234	-1.4583	0.19023	-7.66601	1.77e-14	4.57e-12	57.8376	52.2692	18.662	18.1649
ENSMUSG00000029675.12	Eln	634.976	-1.5347	0.202704	-7.57113	3.7e-14	9.4e-12	18.9438	17.1556	5.75838	5.69211
ENSMUSG00000040610.7	Tlx3	137.216	-4.48198	0.60011	-7.46861	8.1e-14	2.03e-11	12.6088	9.53557	0.7401	0.164688
ENSMUSG00000069171.13	Nr2f1	4650.34	-1.23026	0.164945	-7.45861	8.74e-14	2.16e-11	152.085	127.504	59.1775	50.4003
ENSMUSG00000027220.2	Syt13	416.245	-2.90786	0.390866	-7.43954	1.01e-13	2.46e-11	13.9397	11.2929	2.17677	0.934257
ENSMUSG00000048978.13	Nrsn1	157.089	-2.65498	0.358974	-7.39601	1.4e-13	3.37e-11	8.87685	7.27253	1.22773	1.10804
ENSMUSG00000037610.15	Kcnmb2	220.644	-2.90181	0.393953	-7.36587	1.76e-13	4.17e-11	7.82351	9.32561	1.39776	0.741517
ENSMUSG00000048126.16	Col6a3	538.217	-2.71037	0.369258	-7.34005	2.14e-13	4.93e-11	8.85123	6.37684	0.723722	1.39921
ENSMUSG00000062432.4	Cyp26c1	88.2745	-6.64471	0.905108	-7.34135	2.11e-13	4.93e-11	8.15059	4.82497	0	0.115612
ENSMUSG00000073489.5	Ifi204	331.101	1.95478	0.269001	7.26681	3.68e-13	8.39e-11	3.58222	4.10481	14.4363	13.3494
ENSMUSG00000032318.12	Isl2	341.09	-2.2051	0.304116	-7.25086	4.14e-13	9.32e-11	27.6604	21.992	5.9046	3.98037
ENSMUSG00000007946.10	Phox2a	326.113	-2.76925	0.382815	-7.23391	4.69e-13	1.04e-10	22.3452	23.1872	4.23473	1.98604
ENSMUSG00000027868.11	Tbx15	160.106	-2.80198	0.388545	-7.21147	5.54e-13	1.21e-10	6.03186	4.1272	0.632843	0.696497
ENSMUSG00000099032.2	Tcf24	161.391	-2.6148	0.37031	-7.0611	1.65e-12	3.58e-10	5.48016	6.54215	0.989152	0.826792
ENSMUSG00000068327.5	Tlx2	224.354	-2.42771	0.3439	-7.05935	1.67e-12	3.58e-10	15.1545	18.9915	3.41176	2.50716
ENSMUSG00000031595.9	Pdgfrl	349.356	-1.75515	0.251071	-6.99066	2.74e-12	5.79e-10	23.9124	20.5238	6.30242	5.77912
ENSMUSG00000047686.9	Zcchc5	217.176	2.83156	0.405469	6.98342	2.88e-12	6.03e-10	0.91812	1.35152	6.21222	9.07489
ENSMUSG00000053825.14	Ppfia2	250.905	2.05458	0.294309	6.98102	2.93e-12	6.06e-10	0.974419	1.07358	4.07769	3.8225
ENSMUSG00000048251.15	Bcl11b	902.325	-1.7298	0.249971	-6.91999	4.52e-12	9.23e-10	14.9166	10.6082	4.02702	3.03825
ENSMUSG00000106885.1	Eif3s6-ps4	138.722	10.3572	1.49893	6.90976	4.85e-12	9.81e-10	0	0	10.2836	13.3417
ENSMUSG00000060548.12	Tnfrsf19	2137.71	1.27537	0.185181	6.88715	5.69e-12	1.14e-09	16.8947	17.7521	36.0206	41.2316
ENSMUSG00000037025.11	Foxa2	641.475	2.35585	0.343569	6.857	7.03e-12	1.39e-09	5.33544	9.12188	29.1675	39.7894
ENSMUSG00000056222.14	Spock1	292.928	-2.29688	0.339063	-6.77419	1.25e-11	2.44e-09	6.49329	8.81359	1.70032	1.19371
ENSMUSG00000034324.16	Tmem132c	2168.79	-1.45046	0.214398	-6.76526	1.33e-11	2.57e-09	50.0262	35.7993	15.8229	12.9899
ENSMUSG00000030653.16	Pde2a	693.04	-1.71331	0.253357	-6.76246	1.36e-11	2.59e-09	14.3444	17.9861	5.13564	4.01316
ENSMUSG00000022220.13	Adcy4	699.711	-1.49156	0.220651	-6.7598	1.38e-11	2.61e-09	20.0391	18.0281	7.0261	5.43252
ENSMUSG00000045515.3	Pou3f3	108.008	-2.97964	0.440877	-6.75844	1.39e-11	2.61e-09	1.59554	1.72953	0.226856	0.162473
ENSMUSG00000025407.6	Gli1	1316.97	2.76439	0.409295	6.75402	1.44e-11	2.66e-09	3.20371	8.44549	41.6646	32.8808
ENSMUSG00000027581.12	Stmn3	285.139	-2.04191	0.302895	-6.74131	1.57e-11	2.88e-09	22.8332	28.9566	6.1711	5.49739
ENSMUSG00000019817.18	Plagl1	6689.94	1.59305	0.23675	6.72886	1.71e-11	3.1e-09	56.8964	45.7859	116.073	167.063
ENSMUSG00000031375.17	Bgn	1331.47	-1.11568	0.166137	-6.71542	1.88e-11	3.37e-09	51.5327	48.454	21.5193	20.9324
ENSMUSG00000047261.9	Gap43	1859.8	-1.17929	0.175717	-6.71132	1.93e-11	3.43e-09	116.77	117.247	52.2418	43.1356
ENSMUSG00000030350.8	Prmt8	75.2258	-5.60127	0.839136	-6.67505	2.47e-11	4.35e-09	3.11168	3.85068	0.144705	0
ENSMUSG00000030825.17	Hsd17b14	71.3445	-3.90754	0.586054	-6.66755	2.6e-11	4.51e-09	7.51222	6.94935	0.599524	0.287572
ENSMUSG00000037306.13	Man1c1	593.198	-1.58049	0.237069	-6.6668	2.61e-11	4.51e-09	14.9505	11.7781	4.53501	3.66791
ENSMUSG00000017897.18	Eya2	418.892	-1.62568	0.243997	-6.6627	2.69e-11	4.55e-09	26.1348	21.3865	7.47456	6.6952
ENSMUSG00000027508.15	Pag1	1055.61	1.44783	0.2173	6.66284	2.69e-11	4.55e-09	4.06768	5.07738	11.6503	11.505
ENSMUSG00000028152.10	Tspan5	1072.12	-1.26124	0.191881	-6.57307	4.93e-11	8.27e-09	22.6029	18.8211	8.4955	7.3639
ENSMUSG00000091455.3	Otogl	127.436	10.2348	1.55779	6.57008	5.03e-11	8.35e-09	0	0	1.20189	3.03682
ENSMUSG00000062647.16	Rpl7a	3012.82	-1.12244	0.170957	-6.5656	5.18e-11	8.53e-09	295.893	326.5	129.131	134.382
ENSMUSG00000014603.2	Alx3	127.85	-3.02574	0.461016	-6.5632	5.27e-11	8.59e-09	9.93251	5.84879	1.02535	0.749482
ENSMUSG00000004366.3	Sst	94.7053	-4.46457	0.681477	-6.55131	5.7e-11	9.22e-09	10.8207	27.6955	0.95343	0.672122
ENSMUSG00000004872.15	Pax3	107.933	-4.51492	0.689905	-6.54426	5.98e-11	9.58e-09	3.76689	3.8447	0.269821	0.039213
ENSMUSG00000009281.6	Rarres2	378.838	-1.71985	0.263786	-6.51987	7.04e-11	1.12e-08	31.6408	23.7303	7.90543	7.47325
ENSMUSG00000019124.10	Scrn1	267.247	-1.86176	0.287177	-6.48295	8.99e-11	1.39e-08	6.50105	5.13488	1.4736	1.45427
ENSMUSG00000051323.16	Pcdh19	276.858	-2.14726	0.331214	-6.48301	8.99e-11	1.39e-08	3.4344	2.89267	0.816501	0.50437
ENSMUSG00000061684.5	Rpl21-ps8	1576.16	1.08509	0.167354	6.48381	8.94e-11	1.39e-08	135.047	136.934	278.602	253.632
ENSMUSG00000024868.8	Dkk1	396.986	-2.26954	0.35102	-6.46558	1.01e-10	1.53e-08	21.5995	13.5305	4.13522	2.53043
ENSMUSG00000050321.2	Neto1	133.307	2.52128	0.389954	6.46558	1.01e-10	1.53e-08	0.673933	0.74348	3.81958	3.82307
ENSMUSG00000031144.15	Syp	296.905	-2.34755	0.36363	-6.45589	1.08e-10	1.62e-08	13.6711	16.3996	3.53259	1.95356
ENSMUSG00000028337.14	Coro2a	329.975	-1.64164	0.254726	-6.44475	1.16e-10	1.73e-08	9.12033	8.32237	2.49755	2.64188
ENSMUSG00000041073.10	Nacad	149.836	-2.27381	0.353047	-6.44055	1.19e-10	1.76e-08	3.44577	3.10446	0.653227	0.590272
ENSMUSG00000067242.11	Lgi1	93.8835	-4.55297	0.708687	-6.42451	1.32e-10	1.94e-08	2.68385	0.971957	0.101519	0.042013
ENSMUSG00000022449.14	Adamts20	463.304	3.08881	0.482037	6.40784	1.48e-10	2.15e-08	0.989316	1.04583	12.2457	3.94957
ENSMUSG00000026833.18	Olfm1	1331.67	-1.39427	0.21785	-6.40011	1.55e-10	2.24e-08	58.9066	50.2337	22.1951	16.0548
ENSMUSG00000094526.1	Gm21451	1213.63	-1.34218	0.209756	-6.39876	1.57e-10	2.25e-08	41.654	39.2229	16.9288	12.4984
ENSMUSG00000068036.14	Mllt4	3509.43	1.08177	0.169288	6.39012	1.66e-10	2.36e-08	46.8005	37.5106	85.7493	77.8777
ENSMUSG00000053965.10	Pde5a	1917.94	0.995417	0.156127	6.37569	1.82e-10	2.57e-08	11.8947	11.1968	21.4953	20.8625
ENSMUSG00000018169.12	Mfng	550.429	-1.58904	0.250364	-6.3469	2.2e-10	3.08e-08	28.8362	32.302	10.7598	8.06966
ENSMUSG00000035493.9	Tgfbi	3395.71	-1.281	0.201896	-6.34483	2.23e-10	3.09e-08	136.154	96.4238	43.5053	44.0942
ENSMUSG00000046743.6	Fat4	2286.52	1.17156	0.184959	6.33418	2.39e-10	3.29e-08	5.50887	6.02718	11.2999	12.6593
ENSMUSG00000013646.17	Sh3bp5l	888	-1.17175	0.185099	-6.3304	2.45e-10	3.34e-08	19.0539	17.7411	7.9022	7.13182
ENSMUSG00000023484.13	Prph	317.714	-1.92394	0.304428	-6.31986	2.62e-10	3.55e-08	15.3698	20.5766	4.58195	4.19575
ENSMUSG00000041556.8	Fbxo2	107.031	-3.28067	0.522291	-6.2813	3.36e-10	4.52e-08	9.31536	10.0964	1.30222	0.54257
ENSMUSG00000059970.6	Hspa2	331.905	-1.69966	0.270779	-6.27694	3.45e-10	4.62e-08	12.162	13.7255	3.51938	3.85514
ENSMUSG00000037335.13	Hand1	359.856	1.61824	0.258365	6.26338	3.77e-10	5e-08	6.67125	5.41698	18.0787	15.7787
ENSMUSG00000022894.5	Adamts5	210.005	-1.95269	0.311878	-6.26106	3.82e-10	5.04e-08	2.89463	2.4382	0.595982	0.661639
ENSMUSG00000034205.16	Loxl2	5540.67	-1.24246	0.198981	-6.24411	4.26e-10	5.57e-08	101.202	87.9238	42.9482	30.7423
ENSMUSG00000006575.14	Rundc3a	213.989	-1.99233	0.319218	-6.2413	4.34e-10	5.63e-08	20.0361	16.5972	4.77383	3.70241
ENSMUSG00000000805.18	Car4	249.287	3.46668	0.556169	6.23314	4.57e-10	5.89e-08	1.6262	2.56114	33.3953	10.9007
ENSMUSG00000020135.13	Apc2	263.898	-1.80062	0.289534	-6.21901	5e-10	6.4e-08	3.48715	3.1087	0.98185	0.76149
ENSMUSG00000026923.15	Notch1	1906.46	-1.08438	0.174572	-6.21164	5.24e-10	6.66e-08	21.6543	20.8655	10.1611	8.32191
ENSMUSG00000023078.6	Cxcl13	289.518	3.28345	0.528717	6.21021	5.29e-10	6.67e-08	1.56546	4.21682	37.1408	17.5728
ENSMUSG00000037235.13	Mxd4	3382.14	-0.911713	0.146977	-6.20311	5.54e-10	6.93e-08	79.4084	71.6811	37.308	36.5167
ENSMUSG00000027071.14	P2rx3	204.887	-2.25782	0.365184	-6.1827	6.3e-10	7.83e-08	11.4651	15.415	3.00399	2.21823
ENSMUSG00000033191.14	Tie1	1834.6	-1.0963	0.177747	-6.16777	6.93e-10	8.55e-08	38.8886	43.1913	18.517	16.9448
ENSMUSG00000033706.13	Smyd5	1291.03	1.06326	0.172577	6.16107	7.23e-10	8.86e-08	27.0098	25.5906	53.4739	47.7453
ENSMUSG00000001496.15	Nkx2-1	423.591	1.94323	0.315802	6.15332	7.59e-10	9.2e-08	6.16205	3.60736	15.9204	17.8994
ENSMUSG00000028078.14	Dclk2	559.833	-1.32025	0.214571	-6.15299	7.6e-10	9.2e-08	10.0607	10.1357	4.00043	3.46399
ENSMUSG00000000392.17	Fap	298.738	-2.34749	0.381764	-6.14907	7.79e-10	9.36e-08	17.0814	8.88303	2.12735	2.49838
ENSMUSG00000014704.10	Hoxa2	1330.79	-1.1411	0.185728	-6.14392	8.05e-10	9.61e-08	73.1862	60.1049	27.195	28.2255
ENSMUSG00000043079.17	Synpo	1165.82	-1.24976	0.203794	-6.13249	8.65e-10	1.03e-07	24.4113	18.6473	8.75733	7.83916
ENSMUSG00000044365.15	Cxxc4	1196.65	1.58498	0.2585	6.13146	8.71e-10	1.03e-07	5.82888	8.64859	20.607	19.8155
ENSMUSG00000106995.1	Gm42712	157.375	-2.42321	0.396874	-6.10575	1.02e-09	1.2e-07	5.98846	6.9001	1.36807	0.858688
ENSMUSG00000048138.9	Dmrt2	212.804	-2.32686	0.381938	-6.09224	1.11e-09	1.29e-07	12.4129	7.20416	1.93302	1.62675
ENSMUSG00000028546.17	Elavl4	961.745	-1.1626	0.190871	-6.091	1.12e-09	1.3e-07	21.0504	22.6044	9.40838	8.60349
ENSMUSG00000039860.19	Srrm3	57.9359	-4.32336	0.710181	-6.08769	1.15e-09	1.31e-07	2.55481	3.61553	0.112394	0.153929
ENSMUSG00000024011.16	Pi16	119.035	-2.68625	0.441639	-6.08244	1.18e-09	1.35e-07	5.29962	4.31392	0.544894	0.831941
ENSMUSG00000031530.6	Dusp4	684.34	-1.19421	0.196737	-6.07012	1.28e-09	1.45e-07	23.3438	21.4949	9.40613	8.61976
ENSMUSG00000027559.5	Car3	167.171	-2.16145	0.357781	-6.04128	1.53e-09	1.72e-07	12.8057	9.27454	2.32437	2.18611
ENSMUSG00000026766.16	Mmadhc	1800.77	0.966119	0.160254	6.02869	1.65e-09	1.85e-07	68.4699	66.6269	121.421	121.635
ENSMUSG00000018196.18	Glrx2	727.193	-1.3104	0.218089	-6.00857	1.87e-09	2.08e-07	35.9038	27.5895	11.7219	11.6858
ENSMUSG00000030257.16	Srgap3	645.044	-1.43614	0.239901	-5.98638	2.15e-09	2.37e-07	8.47775	6.34966	2.36741	2.64131
ENSMUSG00000020241.13	Col6a2	676.6	-1.18376	0.198207	-5.97234	2.34e-09	2.57e-07	15.6983	14.3029	6.35021	5.79903
ENSMUSG00000039683.16	Sdk1	260.4	-1.80893	0.303534	-5.95955	2.53e-09	2.76e-07	2.54779	2.82488	0.809192	0.609192
ENSMUSG00000000184.12	Ccnd2	20894.6	0.831687	0.140441	5.92197	3.18e-09	3.45e-07	165.331	155.568	256.032	268.962
ENSMUSG00000021803.9	Cdhr1	248.864	-3.81273	0.644201	-5.91854	3.25e-09	3.5e-07	8.45681	5.5366	0.791983	0.128923
ENSMUSG00000028785.12	Hpca	133.052	-2.46233	0.416113	-5.91747	3.27e-09	3.5e-07	9.41486	7.96103	1.78965	1.09284
ENSMUSG00000042631.7	Xkr7	75.3205	-3.29494	0.557228	-5.9131	3.36e-09	3.57e-07	3.48902	3.02913	0.402239	0.196024
ENSMUSG00000021604.15	Irx4	60.382	-4.33684	0.73375	-5.91051	3.41e-09	3.61e-07	3.962	1.82148	0.162774	0.096276
ENSMUSG00000037239.7	Spred3	588.982	-1.53381	0.260105	-5.89686	3.7e-09	3.87e-07	16.3319	13.0193	5.46546	3.85947
ENSMUSG00000037902.18	Sirpa	759.313	-1.18362	0.200699	-5.89748	3.69e-09	3.87e-07	22.959	19.7939	9.21776	8.07384
ENSMUSG00000048385.8	Scrt1	91.7816	-2.89285	0.491623	-5.88429	4e-09	4.16e-07	2.86435	2.34335	0.40706	0.237817
ENSMUSG00000037625.7	Cldn11	626.399	2.19912	0.375704	5.85334	4.82e-09	4.98e-07	5.15323	9.99275	27.0905	38.0085
ENSMUSG00000033726.8	Emx1	94.8326	-3.40255	0.581947	-5.84684	5.01e-09	5.15e-07	8.90874	6.36758	0.982757	0.355815
ENSMUSG00000005672.12	Kit	1372.74	-1.28971	0.221239	-5.82947	5.56e-09	5.68e-07	46.6121	35.3003	17.4018	13.3899
ENSMUSG00000053475.5	Tnfaip6	238.724	-1.84004	0.315691	-5.82859	5.59e-09	5.68e-07	16.493	11.8122	3.77884	3.42174
ENSMUSG00000036856.4	Wnt4	652.621	1.31066	0.225198	5.82002	5.88e-09	5.93e-07	5.58861	5.89215	14.6644	11.7111
ENSMUSG00000039542.15	Ncam1	1210.25	-1.46961	0.25258	-5.81841	5.94e-09	5.93e-07	16.9311	24.1564	7.24548	6.51043
ENSMUSG00000078861.8	Zfp931	271.341	2.05179	0.352614	5.8188	5.93e-09	5.93e-07	7.62731	4.37126	20.6959	23.8665
ENSMUSG00000035597.18	Prpf39	4052.26	0.988058	0.170374	5.79935	6.66e-09	6.61e-07	40.8261	43.936	73.9001	80.9601
ENSMUSG00000063354.6	Slc39a4	171.356	3.61488	0.623732	5.79556	6.81e-09	6.73e-07	0.916992	0.604384	13.2958	3.79185
ENSMUSG00000024754.12	Tmem2	6746.11	-0.855618	0.147675	-5.79391	6.88e-09	6.75e-07	90.9663	79.1513	45.5026	40.9515
ENSMUSG00000028072.6	Ntrk1	140.506	-2.35598	0.406694	-5.793	6.91e-09	6.75e-07	5.06072	6.58069	1.22401	0.889635
ENSMUSG00000025790.14	Slco3a1	850.738	-1.25471	0.216708	-5.78987	7.04e-09	6.84e-07	22.2445	17.8609	8.54149	6.90554
ENSMUSG00000035551.6	Igfbpl1	541.927	-1.73833	0.300563	-5.78358	7.31e-09	7.07e-07	20.851	20.4899	7.25123	4.20829
ENSMUSG00000056947.5	Mab21l1	682.833	-1.57859	0.273127	-5.77968	7.48e-09	7.19e-07	30.1474	22.9667	9.81912	6.52017
ENSMUSG00000034161.7	Scx	352.661	-1.87581	0.325415	-5.76436	8.2e-09	7.83e-07	34.8305	28.2562	9.91914	5.89327
ENSMUSG00000081483.1	Gm12445	52.6148	8.95859	1.55483	5.76178	8.32e-09	7.91e-07	0	0	7.09649	7.01454
ENSMUSG00000029106.14	Add1	2937.52	-1.32252	0.229693	-5.75779	8.52e-09	8.06e-07	154.7	149.231	68.2867	44.1598
ENSMUSG00000022114.4	Spry2	1390	-1.24926	0.217169	-5.75247	8.79e-09	8.23e-07	63.1175	57.9097	27.4819	19.5041
ENSMUSG00000025969.15	Nrp2	3593.97	-0.847984	0.147411	-5.75253	8.79e-09	8.23e-07	49.3929	45.5355	24.0532	24.426
ENSMUSG00000057894.10	Zfp329	1243.75	1.4884	0.260406	5.7157	1.09e-08	1.02e-06	7.55956	5.06548	14.1837	18.0289
ENSMUSG00000025400.10	Tac2	49.4816	-9.28377	1.62962	-5.69688	1.22e-08	1.13e-06	4.22418	10.498	0	0
ENSMUSG00000026890.19	Lhx6	230.35	-1.69197	0.29728	-5.69151	1.26e-08	1.16e-06	6.8788	7.30869	1.93815	2.11257
ENSMUSG00000094344.1	Gm11942	3246.15	0.850494	0.149666	5.68259	1.33e-08	1.22e-06	432.844	431.822	750.386	686.662
ENSMUSG00000039910.9	Cited2	1960.76	-1.20488	0.212408	-5.67247	1.41e-08	1.28e-06	96.9168	82.5556	41.8011	29.9239
ENSMUSG00000046807.9	Lrrc75b	136.194	-2.22496	0.39227	-5.672	1.41e-08	1.28e-06	3.66875	2.64687	0.674127	0.558087
ENSMUSG00000021194.5	Chga	91.9201	-2.5442	0.450021	-5.65352	1.57e-08	1.42e-06	5.16801	5.58404	0.803883	0.880729
ENSMUSG00000018932.9	Map2k3	953.762	-1.20053	0.212719	-5.64372	1.66e-08	1.49e-06	50.0618	38.5782	19.0811	16.31
ENSMUSG00000030768.12	Disp1	855.204	-1.21423	0.215156	-5.64348	1.67e-08	1.49e-06	18.0008	14.1364	6.91679	5.79108
ENSMUSG00000105987.4	AI506816	1153.69	-1.15492	0.204976	-5.6344	1.76e-08	1.56e-06	47.8318	55.8326	22.9664	20.0955
ENSMUSG00000036596.6	Cpz	115.691	-2.31262	0.4109	-5.62819	1.82e-08	1.61e-06	6.05315	5.04194	0.907971	1.13207
ENSMUSG00000079658.9	Tceb1	3163.63	1.59407	0.283831	5.61626	1.95e-08	1.72e-06	105.145	86.1639	195.846	331.338
ENSMUSG00000028681.11	Ptch2	201.859	2.30329	0.410463	5.61143	2.01e-08	1.76e-06	0.977232	1.76305	7.24681	5.57987
ENSMUSG00000002289.15	Angptl4	494.816	-1.23479	0.220201	-5.60756	2.05e-08	1.79e-06	15.9313	16.4206	6.33329	6.34551
ENSMUSG00000008489.18	Elavl2	1052.06	-1.00028	0.178468	-5.60483	2.08e-08	1.81e-06	26.4066	24.0322	12.2071	10.9987
ENSMUSG00000100241.1	Slc18a3	108.347	-2.36318	0.422711	-5.59052	2.26e-08	1.95e-06	5.17889	4.50693	1.00102	0.73128
ENSMUSG00000021614.16	Vcan	17554	1.47002	0.263442	5.58006	2.4e-08	2.06e-06	72.839	47.8071	125.071	179.591
ENSMUSG00000031119.4	Gpc4	953.391	-1.3332	0.239609	-5.56407	2.64e-08	2.25e-06	39.8016	26.9104	12.5102	11.6872
ENSMUSG00000002633.4	Shh	1029.42	1.76223	0.317323	5.55343	2.8e-08	2.38e-06	10.4031	10.7717	23.7122	42.1258
ENSMUSG00000046546.3	Fam43a	582.604	-1.18702	0.213838	-5.55102	2.84e-08	2.4e-06	17.2131	16.7334	7.45221	6.29064
ENSMUSG00000029661.16	Col1a2	13540.3	-0.857359	0.154593	-5.54589	2.92e-08	2.46e-06	237.37	210.383	124.008	103.53
ENSMUSG00000056812.13	St8sia3	129.066	-3.21424	0.579715	-5.54452	2.95e-08	2.47e-06	4.53613	1.71786	0.38361	0.215734
ENSMUSG00000044349.15	Snhg11	397.668	-1.40943	0.254635	-5.5351	3.11e-08	2.6e-06	7.08737	6.69189	2.71385	2.07565
ENSMUSG00000018634.10	Crhr1	36.6487	-8.83763	1.60298	-5.51324	3.52e-08	2.93e-06	2.10749	1.75293	0	0
ENSMUSG00000038591.3	Colec10	61.0558	6.89671	1.2511	5.5125	3.54e-08	2.93e-06	0	0.021001	0.952113	2.1536
ENSMUSG00000021357.13	Exoc2	2378.13	1.00359	0.182187	5.50855	3.62e-08	2.98e-06	23.0666	23.8442	40.2546	46.28
ENSMUSG00000034648.9	Lrrn1	1506.16	-0.934705	0.170278	-5.48928	4.04e-08	3.31e-06	37.1752	31.8407	16.856	16.2889
ENSMUSG00000042354.6	Gnl3	4286.77	0.833833	0.151993	5.48599	4.11e-08	3.35e-06	105.59	105.196	168.623	177.078
ENSMUSG00000021281.15	Tnfaip2	175.053	-1.97033	0.359462	-5.48133	4.22e-08	3.43e-06	12.2023	9.6824	2.99013	2.08196
ENSMUSG00000015579.4	Nkx2-5	268.893	1.71114	0.312343	5.47839	4.29e-08	3.47e-06	5.96926	4.73426	18.4749	13.6013
ENSMUSG00000024347.16	Psd2	78.3717	-2.96143	0.540903	-5.47497	4.38e-08	3.49e-06	2.56459	1.58306	0.281451	0.19699
ENSMUSG00000063919.10	Srrm4	238.716	-1.75685	0.320882	-5.47508	4.37e-08	3.49e-06	4.6246	3.44897	1.23561	0.953226
ENSMUSG00000104861.1	RP24-490H13.4	98.7533	3.50448	0.640023	5.47555	4.36e-08	3.49e-06	0.383784	1.76312	11.5343	13.3777
ENSMUSG00000044533.15	Rps2	5098.19	-0.862259	0.157528	-5.47367	4.41e-08	3.5e-06	444.982	482.697	245.296	225.577
ENSMUSG00000032473.13	Cldn18	45.229	8.74036	1.60007	5.46249	4.69e-08	3.71e-06	0	0	0.943621	1.60582
ENSMUSG00000063415.12	Cyp26b1	893.112	-1.42924	0.261814	-5.45899	4.79e-08	3.77e-06	22.7494	15.2274	7.32974	5.58627
ENSMUSG00000031891.5	Hsd11b2	2009.82	1.28353	0.235196	5.4573	4.83e-08	3.79e-06	34.2798	46.9504	100.622	83.0329
ENSMUSG00000038393.14	Txnip	2620.38	-1.04298	0.192131	-5.42851	5.68e-08	4.43e-06	90.8499	84.3259	44.9356	33.4878
ENSMUSG00000001120.15	Pcbp3	627.173	-1.09518	0.201824	-5.42639	5.75e-08	4.46e-06	32.6393	29.311	13.7245	12.9084
ENSMUSG00000022687.11	Boc	1226.48	-0.959817	0.177234	-5.41555	6.11e-08	4.72e-06	23.7744	23.3579	11.9833	10.3672
ENSMUSG00000028626.5	Col9a2	877.863	-1.49646	0.276505	-5.41207	6.23e-08	4.79e-06	37.0533	23.943	11.4348	8.37439
ENSMUSG00000032511.17	Scn5a	170.85	-2.34004	0.433466	-5.39843	6.72e-08	5.15e-06	2.88698	1.50383	0.436459	0.354105
ENSMUSG00000028729.15	Ebna1bp2	3211.36	0.804453	0.149137	5.39405	6.89e-08	5.23e-06	74.6515	69.6559	122.147	109.855
ENSMUSG00000070643.11	Sox13	1038.65	-1.07525	0.199328	-5.3944	6.88e-08	5.23e-06	38.0733	31.9794	16.7464	13.8046
ENSMUSG00000022421.18	Nptxr	145.352	-1.97654	0.366853	-5.38784	7.13e-08	5.38e-06	2.95547	3.03639	0.796133	0.604899
ENSMUSG00000040717.5	Il17rd	2524.29	-1.07409	0.199367	-5.38749	7.14e-08	5.38e-06	27.6848	26.0004	13.6298	9.90388
ENSMUSG00000063063.12	Ctnna2	461.699	-1.43297	0.266754	-5.37186	7.79e-08	5.85e-06	10.3581	13.4453	4.16006	4.0254
ENSMUSG00000089901.1	Gm8113	413.254	1.60139	0.298302	5.36836	7.95e-08	5.93e-06	5.41308	4.3494	11.3226	15.6397
ENSMUSG00000031970.16	Dbndd1	213.818	-1.64475	0.307388	-5.35073	8.76e-08	6.52e-06	15.001	13.7349	4.7107	3.76315
ENSMUSG00000029603.15	Dtx1	131.662	-1.98239	0.370664	-5.3482	8.88e-08	6.58e-06	4.6675	5.18729	1.23262	1.08025
ENSMUSG00000025932.14	Eya1	1523.24	-1.03339	0.194052	-5.3253	1.01e-07	7.41e-06	42.5318	32.5012	17.3747	16.2429
ENSMUSG00000041911.3	Dlx1	460.909	-1.65027	0.309895	-5.32526	1.01e-07	7.41e-06	19.717	19.0331	7.245	4.19989
ENSMUSG00000056306.5	Sertm1	225.708	-2.75702	0.51848	-5.31751	1.05e-07	7.7e-06	12.6612	4.52009	0.936903	1.33907
ENSMUSG00000026586.16	Prrx1	9153.24	-1.03626	0.195026	-5.31341	1.08e-07	7.84e-06	177.795	128.557	65.5891	71.1469
ENSMUSG00000050505.7	Pcdh20	107.289	-2.40456	0.452869	-5.30961	1.1e-07	7.97e-06	2.73381	1.73033	0.389581	0.373812
ENSMUSG00000092541.7	Gm20537	35.3756	-8.78126	1.65508	-5.30563	1.12e-07	8.11e-06	10.3105	4.51931	0	0
ENSMUSG00000037579.6	Kcnh3	42.4544	-9.0398	1.7058	-5.29944	1.16e-07	8.36e-06	2.50289	0.587724	0	0
ENSMUSG00000020598.15	Nrcam	419.693	1.7714	0.334886	5.28956	1.23e-07	8.79e-06	1.2002	2.04427	5.01668	5.3721
ENSMUSG00000028469.15	Npr2	850.326	-1.41471	0.267694	-5.28482	1.26e-07	8.98e-06	39.4926	29.0644	14.1596	9.49274
ENSMUSG00000020061.17	Mybpc1	499.714	-2.06884	0.391597	-5.28309	1.27e-07	9.03e-06	33.6777	20.7074	8.05438	3.8861
ENSMUSG00000029167.13	Ppargc1a	212.38	1.89429	0.359529	5.26881	1.37e-07	9.72e-06	0.857857	0.927482	2.54326	3.58881
ENSMUSG00000033943.15	Mga	4924.76	1.01802	0.19372	5.25515	1.48e-07	1.04e-05	34.7075	29.0689	53.0345	65.2601
ENSMUSG00000001750.15	Tcirg1	985.201	-1.23249	0.235367	-5.23643	1.64e-07	1.15e-05	65.1488	45.2008	23.1056	19.8241
ENSMUSG00000060568.14	Fam78b	316.791	-1.39183	0.265817	-5.23604	1.64e-07	1.15e-05	8.46819	8.66466	2.82711	3.18758
ENSMUSG00000034009.14	Rxfp1	187.072	2.36205	0.451589	5.23053	1.69e-07	1.18e-05	0.527979	1.06695	3.38656	4.3564
ENSMUSG00000000247.11	Lhx2	52.6362	-3.93854	0.753828	-5.22473	1.74e-07	1.21e-05	3.75409	1.47255	0.18499	0.123271
ENSMUSG00000084910.1	C630043F03Rik	410.032	1.81706	0.348	5.22144	1.78e-07	1.23e-05	3.56575	5.34896	12.0582	17.2292
ENSMUSG00000023232.17	Serinc2	806.43	-1.06279	0.20414	-5.20618	1.93e-07	1.32e-05	43.9663	35.7177	17.2736	17.685
ENSMUSG00000048120.16	Entpd1	372.251	-1.42772	0.274209	-5.20669	1.92e-07	1.32e-05	12.6294	12.4998	3.79174	4.85342
ENSMUSG00000068614.7	Actc1	1509.91	-1.2015	0.23086	-5.20442	1.95e-07	1.33e-05	83.6341	99.9209	32.5871	40.9615
ENSMUSG00000031748.15	Gnao1	258.323	-1.8008	0.346573	-5.19603	2.04e-07	1.39e-05	11.6726	11.3183	3.86818	2.24875
ENSMUSG00000055737.12	Ghr	1809.77	0.956139	0.184244	5.18954	2.11e-07	1.43e-05	26.3276	29.7455	49.2149	51.2064
ENSMUSG00000033544.6	Angptl1	467.669	1.68145	0.324061	5.18868	2.12e-07	1.43e-05	5.35477	7.96152	17.0607	22.5733
ENSMUSG00000021062.15	Rab15	838.958	-1.12393	0.216952	-5.18054	2.21e-07	1.49e-05	28.5927	21.459	10.6928	10.3208
ENSMUSG00000079466.2	Prdm12	29.2317	-8.51801	1.64445	-5.17985	2.22e-07	1.49e-05	1.38072	1.65685	0	0
ENSMUSG00000044186.10	Nkx2-6	734.936	-1.94108	0.37505	-5.17554	2.27e-07	1.52e-05	79.1715	53.9702	22.0336	9.96867
ENSMUSG00000042988.10	Notum	128.808	-1.96222	0.379466	-5.171	2.33e-07	1.55e-05	6.87569	6.14757	1.74487	1.35014
ENSMUSG00000028456.17	Unc13b	918.652	-0.945825	0.183604	-5.15143	2.59e-07	1.71e-05	22.0521	20.3909	10.7234	9.56338
ENSMUSG00000022817.14	Itgb5	2542.48	-0.796902	0.154741	-5.1499	2.61e-07	1.72e-05	72.3695	63.828	37.3942	34.6638
ENSMUSG00000017737.2	Mmp9	81.329	-3.60173	0.699758	-5.14711	2.65e-07	1.74e-05	4.07944	2.82113	0.433413	0.094504
ENSMUSG00000032085.4	Tagln	4285.96	-0.769323	0.149541	-5.14456	2.68e-07	1.76e-05	231.529	207.931	116.441	120.414
ENSMUSG00000042078.14	Svop	40.2313	-4.05952	0.79003	-5.13843	2.77e-07	1.81e-05	1.64616	1.40283	0.124094	0.044033
ENSMUSG00000060257.2	Scrt2	52.8714	-3.40944	0.664929	-5.12753	2.94e-07	1.91e-05	1.60776	2.04619	0.213297	0.10411
ENSMUSG00000020183.11	Cpm	2591.53	-0.802789	0.156702	-5.12303	3.01e-07	1.95e-05	43.7584	43.2557	24.4474	21.5232
ENSMUSG00000021469.9	Msx2	472.9	-1.81474	0.35425	-5.12275	3.01e-07	1.95e-05	25.6926	14.0899	6.20382	4.14445
ENSMUSG00000025366.7	Esyt1	1434.28	-0.957641	0.187183	-5.11606	3.12e-07	2.01e-05	36.0267	30.3171	17.1358	14.264
ENSMUSG00000024900.4	Cpt1a	768.236	-1.33941	0.262436	-5.10375	3.33e-07	2.13e-05	20.2748	12.935	6.16669	5.82045
ENSMUSG00000035158.15	Mitf	212.373	-1.51432	0.296712	-5.10366	3.33e-07	2.13e-05	4.46425	3.99886	1.4219	1.3085
ENSMUSG00000038335.13	Tsr1	2609.67	0.946041	0.186212	5.08045	3.77e-07	2.39e-05	41.4376	48.9336	84.8627	76.2219
ENSMUSG00000100157.6	2310034O05Rik	40.5716	8.58323	1.68932	5.08089	3.76e-07	2.39e-05	0	0	6.98606	1.97616
ENSMUSG00000026399.12	Cd55	546.796	1.54138	0.303718	5.07505	3.87e-07	2.45e-05	8.89523	9.67333	19.7457	29.9667
ENSMUSG00000034463.3	Scara3	710.366	1.00117	0.197714	5.06376	4.11e-07	2.58e-05	8.91925	8.97739	17.248	15.7917
ENSMUSG00000042115.4	Klhdc8a	76.8416	-3.00996	0.594367	-5.06414	4.1e-07	2.58e-05	2.21817	1.91881	0.343206	0.129003
ENSMUSG00000049281.15	Scn3b	203.501	-1.75616	0.347324	-5.05625	4.28e-07	2.68e-05	5.0263	6.63266	1.62738	1.58298
ENSMUSG00000051243.13	Islr2	65.1948	-2.79212	0.552374	-5.05475	4.31e-07	2.69e-05	1.47239	1.91276	0.256595	0.198391
ENSMUSG00000046999.2	1110032F04Rik	264.189	-1.49415	0.295747	-5.05212	4.37e-07	2.72e-05	9.11079	10.3328	3.55453	2.84174
ENSMUSG00000040405.13	Havcr1	31.5801	8.222	1.628	5.05036	4.41e-07	2.73e-05	0	0	2.23102	1.67004
ENSMUSG00000032394.5	Igdcc3	6316.22	-1.02053	0.202448	-5.04096	4.63e-07	2.86e-05	194.201	151.296	89.7892	66.8969
ENSMUSG00000017754.13	Pltp	440.561	1.15867	0.229934	5.03914	4.68e-07	2.88e-05	8.07906	7.99662	16.2872	16.8224
ENSMUSG00000038855.10	Itpkb	1198.23	-1.11393	0.22129	-5.03382	4.81e-07	2.94e-05	19.689	14.6082	8.05675	6.48065
ENSMUSG00000053693.16	Mast1	70.9664	-2.64253	0.524979	-5.03359	4.81e-07	2.94e-05	1.60343	1.65421	0.193139	0.278269
ENSMUSG00000027907.4	S100a11	881.928	-1.11205	0.22104	-5.03098	4.88e-07	2.97e-05	166.562	138.306	58.6784	70.4511
ENSMUSG00000063430.9	Wscd2	102.672	-2.12154	0.421861	-5.029	4.93e-07	2.99e-05	2.8019	2.25588	0.571624	0.480579
ENSMUSG00000060402.7	Chst8	140.447	-1.81565	0.361239	-5.02618	5e-07	3.03e-05	5.67795	6.21598	1.58639	1.52587
ENSMUSG00000023022.13	Lima1	3902.69	-0.788026	0.15689	-5.0228	5.09e-07	3.07e-05	83.1277	75.0071	45.5338	38.7852
ENSMUSG00000039257.11	Vstm2b	110.398	-1.97395	0.393044	-5.02221	5.11e-07	3.07e-05	5.06451	4.81956	1.20519	1.12341
ENSMUSG00000089645.3	Gm5766	32.3733	-5.09291	1.01454	-5.01993	5.17e-07	3.09e-05	5.3989	4.20571	0.169835	0.086115
ENSMUSG00000019785.13	Clvs2	45.1986	3.76392	0.751599	5.00788	5.5e-07	3.27e-05	0.209752	0.106366	1.61803	2.05682
ENSMUSG00000079022.9	Col22a1	396.196	1.39314	0.278154	5.00852	5.49e-07	3.27e-05	1.55947	2.01939	4.18276	4.57278
ENSMUSG00000048387.7	Osr1	1104.75	1.6785	0.335826	4.99811	5.79e-07	3.43e-05	11.537	21.7895	56.3951	43.3232
ENSMUSG00000028212.16	Ccne2	2214.41	0.942342	0.189041	4.98485	6.2e-07	3.65e-05	35.2999	34.9997	56.5913	67.5418
ENSMUSG00000044033.16	Ccdc141	759.307	0.953606	0.191304	4.98477	6.2e-07	3.65e-05	7.44594	6.77086	12.9448	12.3521
ENSMUSG00000063052.9	Lrrc40	2695.69	0.881273	0.17707	4.97697	6.46e-07	3.79e-05	34.7453	37.3405	67.1581	55.5686
ENSMUSG00000075270.11	Pde11a	150.546	-1.9079	0.3835	-4.97497	6.53e-07	3.82e-05	6.23312	7.4011	1.46019	1.89045
ENSMUSG00000036782.13	Klhl13	2537.32	0.796728	0.160634	4.95991	7.05e-07	4.11e-05	42.6871	45.3428	71.9306	69.2319
ENSMUSG00000033016.15		202.716	-1.66469	0.335694	-4.95894	7.09e-07	4.12e-05	4.92538	3.70113	1.12975	1.35274
ENSMUSG00000034771.15	Tle2	296.775	-1.6177	0.32632	-4.95739	7.14e-07	4.14e-05	17.8577	14.9312	3.96488	5.83495
ENSMUSG00000027221.5	Chst1	159.921	-1.75056	0.353292	-4.95498	7.23e-07	4.18e-05	6.82172	5.10822	1.69688	1.54595
ENSMUSG00000059481.4	Plg	200.783	23.6843	4.78497	4.94972	7.43e-07	4.28e-05	0	0	17.672	0
ENSMUSG00000066366.14	Serpina1a	85.7932	3.30674	0.668321	4.94783	7.5e-07	4.3e-05	0.395069	0.958525	8.71155	4.05435
ENSMUSG00000085399.7	Foxd2os	158.732	1.97048	0.398735	4.94181	7.74e-07	4.42e-05	1.51391	2.20252	6.09796	7.5172
ENSMUSG00000045136.5	Tubb2b	7820.94	-0.697971	0.141451	-4.93438	8.04e-07	4.58e-05	320.698	327.663	189.019	179.249
ENSMUSG00000000385.7	Tmprss2	472.678	1.9037	0.386063	4.93105	8.18e-07	4.63e-05	4.52228	3.65262	19.3663	8.84991
ENSMUSG00000052854.15	Nrk	1293.87	1.35689	0.275155	4.93137	8.17e-07	4.63e-05	7.06141	6.44903	20.2054	11.771
ENSMUSG00000034595.17	Ppp1r18	1903.39	-0.823612	0.167445	-4.9187	8.71e-07	4.92e-05	54.8579	46.3324	27.2787	25.244
ENSMUSG00000083773.4	Gm13394	7379.6	0.971056	0.197461	4.91771	8.76e-07	4.93e-05	284.852	355.265	553.986	604.173
ENSMUSG00000074115.3	Saa1	50.5664	3.19507	0.650413	4.91238	9e-07	5.05e-05	1.30369	0.873621	8.40333	9.38122
ENSMUSG00000038126.17	Mphosph9	1617.62	0.881649	0.179546	4.91045	9.09e-07	5.08e-05	18.8167	15.7857	28.3234	30.0712
ENSMUSG00000067608.4	Pcna-ps2	4943.94	0.711506	0.145079	4.90425	9.38e-07	5.23e-05	191.17	192.933	290.191	289.016
ENSMUSG00000108555.1	RP23-137A24.3	72.8671	-4.13261	0.842811	-4.90336	9.42e-07	5.23e-05	3.14476	1.43506	0.026932	0.205442
ENSMUSG00000046318.15	Ccbe1	207.142	-1.85579	0.378678	-4.90072	9.55e-07	5.29e-05	3.52311	4.45702	1.27149	0.781081
ENSMUSG00000022404.7	Slc25a17	2229.42	0.886677	0.181033	4.89788	9.69e-07	5.35e-05	62.8803	58.1881	95.1578	110.353
ENSMUSG00000028405.9	Aco1	4130.2	0.748391	0.153228	4.88417	1.04e-06	5.72e-05	52.8421	53.7181	80.6915	84.1141
ENSMUSG00000025085.16	Ablim1	559.185	1.89984	0.389053	4.88326	1.04e-06	5.73e-05	3.58178	5.88948	11.8997	20.7679
ENSMUSG00000042751.14	Nmnat2	137.856	-2.18896	0.448519	-4.88042	1.06e-06	5.79e-05	2.47198	3.89175	0.76793	0.534114
ENSMUSG00000020566.18	Atp6v1c2	44.0334	-3.36395	0.689391	-4.8796	1.06e-06	5.8e-05	2.98255	3.5872	0.364839	0.223557
ENSMUSG00000066258.13	Trim12a	35.0916	-4.56365	0.935662	-4.87745	1.07e-06	5.84e-05	3.07422	1.31147	0.064229	0.10488
ENSMUSG00000086825.1	Gm15675	117.715	2.25522	0.463074	4.87011	1.12e-06	6.05e-05	0.893005	0.556569	2.62533	3.61344
ENSMUSG00000028444.17	Cntfr	1185.55	-1.00491	0.206783	-4.85973	1.18e-06	6.35e-05	56.5443	49.0795	27.52	20.9698
ENSMUSG00000028137.9	Celf3	218.294	-1.5579	0.320771	-4.85672	1.19e-06	6.43e-05	8.68021	6.53261	2.21247	2.49783
ENSMUSG00000023055.9	Calcoco1	1652.78	-0.920454	0.189616	-4.85429	1.21e-06	6.49e-05	58.6379	45.2031	25.8535	24.4389
ENSMUSG00000054863.8	Fam19a5	336.938	-1.37301	0.283075	-4.85034	1.23e-06	6.59e-05	12.0261	12.2685	5.07153	3.60023
ENSMUSG00000105816.4	D030025E07Rik	194.715	3.22914	0.665782	4.85016	1.23e-06	6.59e-05	0.337593	2.16251	11.6639	11.0959
ENSMUSG00000021359.15	Tfap2a	564.275	-1.54455	0.318579	-4.84824	1.25e-06	6.63e-05	19.7618	15.8045	7.23131	4.02259
ENSMUSG00000025348.8	Itga7	44.7506	-3.39405	0.700571	-4.84469	1.27e-06	6.73e-05	1.01466	1.58897	0.117791	0.112907
ENSMUSG00000037034.15	Pax1	410.441	-4.62218	0.954351	-4.84327	1.28e-06	6.76e-05	30.0537	9.6718	1.08292	0.400433
ENSMUSG00000037211.12	Spry1	848.519	-1.36092	0.281214	-4.83946	1.3e-06	6.85e-05	32.5581	25.5745	12.9436	7.89395
ENSMUSG00000039477.16	Tnrc18	5137.17	-0.953446	0.197013	-4.8395	1.3e-06	6.85e-05	62.1633	47.3441	29.176	22.8019
ENSMUSG00000029819.6	Npy	23.4843	-8.20484	1.69761	-4.83318	1.34e-06	7.03e-05	4.42759	6.24685	0	0
ENSMUSG00000067438.5	Hmx1	154.793	-7.14767	1.47871	-4.83371	1.34e-06	7.03e-05	15.635	10.5505	0	0.165444
ENSMUSG00000022875.17	Kng1	131.465	23.0995	4.7851	4.82737	1.38e-06	7.21e-05	0	0	15.8206	0
ENSMUSG00000041378.1	Cldn5	791.24	-1.29352	0.268235	-4.82233	1.42e-06	7.38e-05	44.4953	57.5043	22.5553	16.0922
ENSMUSG00000039395.8	Mreg	383.931	-1.65804	0.343986	-4.82006	1.44e-06	7.41e-05	16.7971	16.0823	6.32949	3.33734
ENSMUSG00000043004.13	Gng2	2110.79	-0.763689	0.158431	-4.82032	1.43e-06	7.41e-05	44.1551	45.2597	24.7585	23.7771
ENSMUSG00000053368.13	Rxfp2	94.4406	-2.07717	0.430972	-4.81972	1.44e-06	7.41e-05	4.02023	3.61422	0.783706	0.873197
ENSMUSG00000075232.4	Amd1	4520.01	0.852983	0.177144	4.81519	1.47e-06	7.56e-05	63.1683	66.1453	99.5328	115.365
ENSMUSG00000063531.7	Sema3e	191.074	2.27389	0.472353	4.81396	1.48e-06	7.58e-05	0.665075	0.769196	2.06317	4.30571
ENSMUSG00000063605.5	Ccdc102a	707.452	-1.04303	0.216815	-4.81071	1.5e-06	7.68e-05	28.7044	25.9587	13.7022	10.7342
ENSMUSG00000029570.5	Lfng	330.699	-1.34228	0.279287	-4.80609	1.54e-06	7.84e-05	12.5156	15.4194	5.37365	4.85202
ENSMUSG00000042099.15	Kank3	494.335	-1.29027	0.268505	-4.80538	1.54e-06	7.85e-05	34.0776	40.0287	16.2196	11.8353
ENSMUSG00000029816.10	Gpnmb	30.1418	-6.17478	1.28539	-4.80382	1.56e-06	7.88e-05	1.35259	0.932607	0.028467	0
ENSMUSG00000069911.10	Fam196b	99.1791	-2.14612	0.447399	-4.79687	1.61e-06	8.14e-05	2.05064	1.82749	0.494295	0.317758
ENSMUSG00000054932.6	Afp	16831.6	10.3791	2.16537	4.79324	1.64e-06	8.26e-05	1.00766	0.875643	2357.75	17.4006
ENSMUSG00000036006.19	Fam65b	191.141	-1.84738	0.385571	-4.79128	1.66e-06	8.32e-05	3.87008	6.08369	1.35775	1.21828
ENSMUSG00000027833.16	Shox2	694.299	-1.21474	0.253714	-4.78785	1.69e-06	8.44e-05	25.3897	22.4467	11.3525	7.6673
ENSMUSG00000021508.10	Cxcl14	59.1135	-2.66411	0.556825	-4.78446	1.71e-06	8.55e-05	3.86057	3.34634	0.602582	0.440952
ENSMUSG00000069372.2	Ctxn3	267.083	-2.97097	0.621012	-4.78408	1.72e-06	8.55e-05	21.339	20.1171	4.17748	0.751913
ENSMUSG00000019900.17	Rfx6	169.049	2.35938	0.493442	4.78148	1.74e-06	8.64e-05	0.660379	1.56753	4.81454	6.08096
ENSMUSG00000023025.15	Larp4	4126.67	0.895502	0.187467	4.77684	1.78e-06	8.8e-05	30.5128	26.5773	43.9838	53.3324
ENSMUSG00000038402.2	Foxf2	415.648	4.82483	1.01007	4.77671	1.78e-06	8.8e-05	0.24053	1.23985	20.342	20.0039
ENSMUSG00000029765.12	Plxna4	1103.45	-1.06871	0.223777	-4.7758	1.79e-06	8.81e-05	7.09764	8.16472	3.82682	2.90896
ENSMUSG00000042514.11	Klhl14	264.791	-2.41042	0.504761	-4.77537	1.79e-06	8.81e-05	8.99841	4.3658	1.63813	0.663862
ENSMUSG00000022619.5	Mapk8ip2	233.65	-1.49012	0.312314	-4.77124	1.83e-06	8.97e-05	6.48108	5.62002	1.75082	2.20204
ENSMUSG00000063953.2	Amd2	2408.94	0.866862	0.181971	4.76374	1.9e-06	9.28e-05	33.4114	35.1732	53.8096	61.3265
ENSMUSG00000028633.7	Ctps	5424.79	0.686027	0.144056	4.76221	1.91e-06	9.33e-05	101.379	100.221	148.035	150.466
ENSMUSG00000002930.6	Ppp1r17	106.943	-3.08223	0.647711	-4.75865	1.95e-06	9.47e-05	6.72759	7.26464	1.25523	0.287384
ENSMUSG00000034610.14	Zcchc11	5387.75	0.906359	0.190565	4.75616	1.97e-06	9.56e-05	71.565	54.521	101.747	114.572
ENSMUSG00000035969.15	Rusc2	366.528	-1.21789	0.256238	-4.75298	2e-06	9.68e-05	8.57325	7.30053	3.4646	2.80973
ENSMUSG00000032303.6	Chrna3	545.541	-1.58179	0.333266	-4.74633	2.07e-06	9.98e-05	15.4501	18.2176	6.80117	3.66005
ENSMUSG00000053137.6	Mapk11	248.954	-1.46965	0.309989	-4.74098	2.13e-06	0.000102189	11.1404	8.28664	3.55191	2.85949
ENSMUSG00000022797.15	Tfrc	5347.27	0.802671	0.169386	4.73871	2.15e-06	0.000103059	75.0399	72.2463	109.383	126.634
ENSMUSG00000087022.4	9130024F11Rik	53.9747	2.74716	0.581051	4.72792	2.27e-06	0.000108397	0.414395	0.369575	2.30187	2.42509
ENSMUSG00000030249.15	Abcc9	124.946	-2.7063	0.572726	-4.72529	2.3e-06	0.000109517	1.67359	2.06176	0.404807	0.127664
ENSMUSG00000024479.2	Mal2	889.133	1.50324	0.31818	4.72451	2.31e-06	0.000109644	8.8182	12.5395	22.0894	33.8855
ENSMUSG00000027596.10	a	22.3631	-8.11714	1.71906	-4.72186	2.34e-06	0.000110785	6.65749	3.6803	0	0
ENSMUSG00000067860.11	Zic3	31.4342	-5.15077	1.09135	-4.71965	2.36e-06	0.000111698	1.09332	0.942626	0	0.051146
ENSMUSG00000015134.14	Aldh1a3	60.3389	-3.75777	0.79678	-4.7162	2.4e-06	0.000112861	3.99469	1.12631	0.143894	0.202879
ENSMUSG00000029267.17	Mtf2	6027.53	0.916459	0.194329	4.71602	2.41e-06	0.000112861	102.23	76.1083	145.195	162.764
ENSMUSG00000074657.4	Kif5a	563.89	-1.08138	0.229305	-4.71592	2.41e-06	0.000112861	7.68499	7.94612	3.80692	3.01786
ENSMUSG00000053716.9	Dusp7	1880.41	-0.824558	0.174932	-4.7136	2.43e-06	0.000113858	51.3672	45.9408	27.6824	22.8994
ENSMUSG00000074274.7	D930028M14Rik	116.44	-2.18565	0.463806	-4.71241	2.45e-06	0.000114221	9.97893	14.3726	3.02307	1.95329
ENSMUSG00000032553.14	Srprb	1322.13	-0.893162	0.189556	-4.71187	2.45e-06	0.000114228	37.3591	36.2998	20.3435	16.2252
ENSMUSG00000056917.12	Sipa1	1453.22	-0.895802	0.190187	-4.71011	2.48e-06	0.000114915	30.8926	32.1244	17.3427	13.9388
ENSMUSG00000028978.12	Nos3	552.942	-1.03976	0.220807	-4.70894	2.49e-06	0.000115075	11.8285	12.2706	5.87865	4.95417
ENSMUSG00000056973.6	Ces1d	188.219	1.73986	0.369494	4.70877	2.49e-06	0.000115075	2.98717	3.92709	9.5947	11.8845
ENSMUSG00000032177.16	Pde4a	239.762	-1.40771	0.29929	-4.70349	2.56e-06	0.000117787	6.21531	4.82153	2.02694	1.76985
ENSMUSG00000033792.12	Atp7a	2189.89	1.19606	0.254369	4.70207	2.58e-06	0.000118299	17.597	17.6222	29.4191	44.5652
ENSMUSG00000027273.13	Snap25	81.7868	-2.54278	0.541099	-4.69929	2.61e-06	0.000119616	4.69525	5.60475	1.10547	0.535523
ENSMUSG00000059921.15	Unc5c	4986.35	0.977566	0.20805	4.6987	2.62e-06	0.000119652	27.9266	23.3968	40.1981	52.3159
ENSMUSG00000017491.8	Rarb	1997.44	1.29138	0.275154	4.69329	2.69e-06	0.000122546	19.271	29.5604	49.8357	60.8575
ENSMUSG00000012520.10	Phox2b	1203.67	-1.13236	0.241429	-4.69025	2.73e-06	0.000123643	38.9963	35.645	18.9748	12.4576
ENSMUSG00000032537.14	Ephb1	370.934	-1.15331	0.245913	-4.6899	2.73e-06	0.000123643	6.84441	7.37796	2.9725	2.92685
ENSMUSG00000055148.7	Klf2	270.537	-1.37135	0.292342	-4.6909	2.72e-06	0.000123643	13.8047	13.4021	5.59668	4.13781
ENSMUSG00000054364.4	Rhob	3130.4	-0.866084	0.184705	-4.68901	2.75e-06	0.000123866	126.297	108.503	66.7821	51.8327
ENSMUSG00000091705.8	H2-Q2	58.2298	3.26292	0.697025	4.68121	2.85e-06	0.000128348	0.688498	0.543589	7.30757	3.33422
ENSMUSG00000055782.8	Abcd2	515.164	-1.02754	0.219559	-4.68	2.87e-06	0.00012878	8.69734	7.45277	3.61403	3.65711
ENSMUSG00000004651.5	Tyr	20.7443	-8.01733	1.71404	-4.67744	2.9e-06	0.00013007	0.859027	0.759508	0	0
ENSMUSG00000000202.9	Btbd17	89.7411	-2.81078	0.601207	-4.67523	2.94e-06	0.000131148	4.66162	4.77426	0.964767	0.320623
ENSMUSG00000025991.8	Cps1	35.125	5.14502	1.10062	4.67466	2.94e-06	0.000131187	0	0.034683	0.520551	0.933576
ENSMUSG00000006457.3	Actn3	185.878	-1.53357	0.328404	-4.66976	3.02e-06	0.000134017	8.12409	6.5547	2.20327	2.45159
ENSMUSG00000006386.15	Tek	1654.14	-0.9755	0.209477	-4.65684	3.21e-06	0.000141993	29.3079	36.6726	15.3832	15.6275
ENSMUSG00000027249.15	F2	92.7863	22.2844	4.78525	4.6569	3.21e-06	0.000141993	0	0	11.1924	0
ENSMUSG00000058145.15	Adamts17	326.571	-1.23723	0.265779	-4.65511	3.24e-06	0.000142834	6.18883	7.14451	2.6637	2.56402
ENSMUSG00000025907.14	Rb1cc1	1990.76	1.18979	0.255832	4.65068	3.31e-06	0.000145579	30.8418	20.13	46.7379	59.1806
ENSMUSG00000040710.10	St8sia4	675.637	1.24262	0.267638	4.6429	3.44e-06	0.000150801	5.6353	3.71302	9.3435	10.7471
ENSMUSG00000020876.14	Snx11	381.319	-1.18306	0.25507	-4.6382	3.51e-06	0.000153884	23.3403	23.0738	10.6049	8.26056
ENSMUSG00000039934.12	Gsap	104.611	-1.8886	0.407782	-4.63139	3.63e-06	0.00015865	2.79047	2.39606	0.678244	0.609065
ENSMUSG00000058355.6	Abce1	10645.8	0.812781	0.17567	4.62675	3.71e-06	0.00016145	138.769	122.66	192.123	228.991
ENSMUSG00000074766.10	Ism1	246.169	-1.75315	0.378906	-4.62687	3.71e-06	0.00016145	10.7883	5.85596	2.10127	2.3768
ENSMUSG00000045763.7	Basp1	9557.73	-0.6695	0.144986	-4.6177	3.88e-06	0.000168241	424.101	395.302	254.385	220.098
ENSMUSG00000050965.14	Prkca	294.925	1.25579	0.27249	4.60858	4.05e-06	0.000175357	1.55001	1.76511	3.70608	3.65209
ENSMUSG00000038252.13	Ncapd2	6008.78	-0.76712	0.16659	-4.60485	4.13e-06	0.0001781	196.85	158.365	93.6877	97.7119
ENSMUSG00000087691.1	Gm15674	63.9492	2.66044	0.57787	4.60387	4.15e-06	0.000178506	0.452999	0.457121	2.20019	3.14726
ENSMUSG00000025504.12	Eps8l2	1193.45	1.10169	0.239398	4.60193	4.19e-06	0.000179745	34.8384	23.7071	53.7611	60.7223
ENSMUSG00000001552.14	Jup	1948.28	-0.83229	0.181041	-4.59724	4.28e-06	0.000183391	52.5497	55.4049	30.7361	25.2454
ENSMUSG00000041703.7	Zic5	29.004	-4.66943	1.01626	-4.59473	4.33e-06	0.00018517	1.02367	0.499139	0.033151	0.015889
ENSMUSG00000025743.14	Sdc3	3028.76	-0.86649	0.188783	-4.58987	4.44e-06	0.000189078	60.3782	45.5869	28.4431	24.8768
ENSMUSG00000024663.17	Rab3il1	840.711	-0.883342	0.19255	-4.58759	4.48e-06	0.000190293	45.0662	40.9734	20.732	22.0576
ENSMUSG00000026768.10	Itga8	705.577	0.917459	0.19999	4.58753	4.49e-06	0.000190293	7.08528	7.11178	12.4388	12.3678
ENSMUSG00000091243.1	Vgll3	61.3383	-2.47828	0.54066	-4.58381	4.57e-06	0.000193253	1.96471	2.08033	0.306505	0.364269
ENSMUSG00000011256.16	Adam19	1885.06	-0.746036	0.162779	-4.58312	4.58e-06	0.00019343	28.2789	25.1612	15.4563	13.844
ENSMUSG00000031074.14	Fgf3	98.9801	-2.32044	0.506529	-4.58106	4.63e-06	0.000193964	4.60675	4.62929	1.16155	0.546445
ENSMUSG00000038408.13	1700018A04Rik	22.6141	7.74033	1.68939	4.58174	4.61e-06	0.000193964	0	0	3.14949	2.73653
ENSMUSG00000046668.8	Cxxc5	2126.75	-0.912945	0.19928	-4.58122	4.62e-06	0.000193964	86.3904	71.6366	43.8724	33.3644
ENSMUSG00000033857.12	Engase	228.259	-1.30011	0.283904	-4.5794	4.66e-06	0.000195055	9.47969	9.01666	3.45547	3.43845
ENSMUSG00000020052.7	Ascl1	157.6	1.91023	0.41764	4.57387	4.79e-06	0.000199803	1.28267	2.08376	6.81846	5.16237
ENSMUSG00000025202.7	Scd3	46.5802	2.96552	0.648855	4.57038	4.87e-06	0.000202679	0.197082	0.194144	1.38391	1.44494
ENSMUSG00000034037.14	Fgd5	1143.42	-1.49427	0.327039	-4.56908	4.9e-06	0.000203464	25.3193	28.3238	11.8692	5.83431
ENSMUSG00000035451.6	Foxa1	1227.91	1.20004	0.262934	4.56404	5.02e-06	0.000207934	14.4902	15.5664	25.6328	37.7793
ENSMUSG00000057722.17	Lepr	300.433	1.50122	0.329032	4.56253	5.05e-06	0.000208943	2.42697	2.1148	4.74967	6.9815
ENSMUSG00000027612.7	Mmp24	56.5169	-4.48831	0.984494	-4.55901	5.14e-06	0.000211988	1.68887	2.20816	0.1596	0
ENSMUSG00000045103.17	Dmd	467.414	1.94011	0.426023	4.554	5.26e-06	0.0002166	1.91932	3.6628	7.1746	12.5601
ENSMUSG00000032013.5	Trim29	127.154	2.12885	0.467659	4.55214	5.31e-06	0.000218016	1.40319	0.791532	3.57599	5.03602
ENSMUSG00000017943.15	Gdap1l1	121.653	-1.71167	0.376296	-4.54874	5.4e-06	0.000221057	5.4091	5.32229	1.55961	1.46629
ENSMUSG00000024647.14	Cbln2	59.9845	-2.41987	0.532692	-4.54272	5.55e-06	0.000226946	2.76518	2.52261	0.451622	0.451904
ENSMUSG00000025630.8	Hprt	1513.21	0.77033	0.16967	4.54017	5.62e-06	0.000229177	55.7462	56.0202	86.3475	89.161
ENSMUSG00000068154.5	Insm1	338.478	-1.74695	0.385064	-4.53679	5.71e-06	0.000232347	12.4303	9.33134	4.03569	1.95676
ENSMUSG00000023087.15	Noct	692.206	1.11031	0.244778	4.53598	5.73e-06	0.00023271	5.16234	5.14255	12.1091	8.49013
ENSMUSG00000010505.15	Myt1	160.938	-2.07099	0.456646	-4.53521	5.75e-06	0.000233026	2.62253	4.4972	0.984261	0.602952
ENSMUSG00000098975.7	Gm27177	88.8687	-2.61108	0.576598	-4.52843	5.94e-06	0.000240084	4.97713	5.78706	1.21465	0.438551
ENSMUSG00000069045.11	Ddx3y	1036.5	1.129	0.249391	4.52702	5.98e-06	0.000241148	14.2223	11.6318	31.1091	20.903
ENSMUSG00000017493.12	Igfbp4	7005.12	-1.55314	0.343179	-4.52574	6.02e-06	0.000241518	119.499	252.253	66.9614	51.1552
ENSMUSG00000036412.5	Arsi	83.8187	-2.54838	0.56306	-4.52595	6.01e-06	0.000241518	3.98652	2.26339	0.633905	0.337868
ENSMUSG00000019909.3	Fam162b	47.6635	2.89379	0.640647	4.51698	6.27e-06	0.000251147	1.31876	1.10928	7.877	8.63647
ENSMUSG00000038733.13	Wdr26	4261.39	-0.64938	0.143844	-4.51447	6.35e-06	0.000253478	71.258	65.9417	40.1139	40.2971
ENSMUSG00000046634.12	Pkd1l1	136.233	1.85443	0.410811	4.51407	6.36e-06	0.000253478	0.386636	0.588145	1.64837	1.68036
ENSMUSG00000019814.4	Ltv1	2230.82	0.765852	0.169806	4.51015	6.48e-06	0.000257635	59.0608	61.326	90.9511	97.6069
ENSMUSG00000033419.15	Snap91	244.128	-1.3122	0.291104	-4.50766	6.55e-06	0.000260099	6.27416	6.37396	2.61235	2.09467
ENSMUSG00000020682.17	Mmp28	146.766	-1.71131	0.38014	-4.50179	6.74e-06	0.000266784	3.95059	5.21252	1.29997	1.29819
ENSMUSG00000042286.13	Stab1	1221.54	-0.788333	0.175227	-4.49892	6.83e-06	0.000269809	20.5331	18.1614	10.1951	10.3755
ENSMUSG00000021474.8	Sfxn1	3272.88	0.742362	0.165238	4.49269	7.03e-06	0.000277215	54.7734	57.3382	83.1832	89.5419
ENSMUSG00000027984.8	Hadh	5026.67	0.681394	0.151761	4.48992	7.13e-06	0.000280225	141.334	135.043	196.72	210.762
ENSMUSG00000033499.13	Larp4b	3703.58	0.655012	0.146001	4.48634	7.25e-06	0.000284342	38.1387	36.8086	56.9321	51.7726
ENSMUSG00000022211.8	Lrrc16b	382.096	-1.14764	0.255996	-4.48302	7.36e-06	0.000288166	8.01609	6.83101	3.44244	2.72509
ENSMUSG00000025995.16	Wdr75	3622.82	0.696654	0.155466	4.48106	7.43e-06	0.000290183	82.2652	75.0666	113.421	120.766
ENSMUSG00000038521.17	C1s1	27.8076	-5.37124	1.2007	-4.47344	7.7e-06	0.00030007	1.50373	0.888655	0	0.05119
ENSMUSG00000015484.3	Fam163a	129.06	-1.77416	0.39674	-4.47186	7.75e-06	0.000301635	3.69203	2.9558	1.04234	0.740363
ENSMUSG00000026509.15	Capn2	3060.25	-0.770739	0.172628	-4.46475	8.02e-06	0.000310381	88.2843	72.1959	46.4596	39.9643
ENSMUSG00000035305.5	Ror1	677.175	-1.05956	0.237338	-4.46434	8.03e-06	0.000310381	11.9855	8.58705	4.65141	4.37427
ENSMUSG00000039936.18	Pik3cd	284.415	-1.19638	0.267953	-4.46488	8.01e-06	0.000310381	5.9286	5.55241	2.20445	2.39425
ENSMUSG00000048281.8	Dleu7	50.3724	2.98845	0.669652	4.46269	8.09e-06	0.000312111	0.342794	0.67553	4.38163	3.63502
ENSMUSG00000028480.14	Glipr2	2248.59	-0.699836	0.156898	-4.46046	8.18e-06	0.000314692	79.1784	75.4696	43.0266	44.5204
ENSMUSG00000068220.5	Lgals1	3946.9	-0.766273	0.172196	-4.45	8.59e-06	0.000329699	413.015	388.163	200.142	232.412
ENSMUSG00000020027.18	Socs2	928.95	-1.03997	0.233877	-4.44667	8.72e-06	0.00033413	44.3759	31.4699	16.1101	17.563
ENSMUSG00000031278.12	Acsl4	1562.73	0.829786	0.186817	4.44171	8.92e-06	0.000341191	14.6624	13.2199	21.184	24.2659
ENSMUSG00000081169.1	Gm12551	20.6554	7.60963	1.71377	4.44029	8.98e-06	0.000342716	0	0	3.105	3.59877
ENSMUSG00000021381.4	Barx1	292.98	-1.44735	0.326067	-4.43879	9.05e-06	0.000344364	18.9242	20.5317	8.23165	5.14968
ENSMUSG00000028080.15	Lrba	2254.25	-0.846473	0.191146	-4.42841	9.49e-06	0.000360184	22.3019	16.9343	9.787	10.1972
ENSMUSG00000039155.15	Cdh26	31.0097	4.5847	1.03534	4.42819	9.5e-06	0.000360184	0	0.099159	1.2949	1.586
ENSMUSG00000046182.8	Gsg1l	77.7711	-2.82962	0.639506	-4.4247	9.66e-06	0.000365284	2.66329	1.83161	0.437385	0.138493
ENSMUSG00000034714.9	Ttyh2	343.81	-1.3199	0.29844	-4.42267	9.75e-06	0.000367953	11.1327	7.43702	3.66062	3.12895
ENSMUSG00000026414.13	Tnnt2	174.303	-2.1798	0.493451	-4.41747	9.99e-06	0.00037612	10.3933	20.599	2.46818	3.89584
ENSMUSG00000040037.13	Negr1	140.838	-1.58528	0.358904	-4.417	1e-05	0.000376136	2.98365	2.66285	0.95068	0.770426
ENSMUSG00000057751.14	Megf6	2016.86	-0.982835	0.222903	-4.40926	1.04e-05	0.000389019	33.5601	23.7144	14.8178	11.7682
ENSMUSG00000033955.12	Tnks1bp1	1922.5	-0.852746	0.193467	-4.4077	1.04e-05	0.000390995	43.8564	36.9879	23.1451	18.0395
ENSMUSG00000095486.1	Vmn2r22	20.0026	7.5633	1.71932	4.39901	1.09e-05	0.000406135	0	0	0.895673	0.938825
ENSMUSG00000026473.15	Glul	4175.81	0.722682	0.16433	4.39775	1.09e-05	0.000407637	79.2122	73.3771	127.751	104.262
ENSMUSG00000025370.6	Cdh9	102.46	1.99088	0.453568	4.38937	1.14e-05	0.00042278	0.672132	0.93993	2.82236	3.23828
ENSMUSG00000054072.11	Iigp1	221.102	2.41377	0.550032	4.38842	1.14e-05	0.000423739	2.00373	0.934613	4.03801	9.95208
ENSMUSG00000041353.12	Tmem29	653.883	1.2853	0.293161	4.38429	1.16e-05	0.000430959	20.6889	17.4786	53.5304	32.1918
ENSMUSG00000006651.7	Aplp1	1053.74	-0.847371	0.193422	-4.38096	1.18e-05	0.000436697	34.8798	37.9769	20.0039	17.422
ENSMUSG00000048458.8	Fam212b	150.681	-1.64045	0.374554	-4.37974	1.19e-05	0.000438232	3.45905	2.80765	1.08516	0.760034
ENSMUSG00000045333.15	Zfp423	1733.67	-0.945103	0.216063	-4.37419	1.22e-05	0.000448594	36.2166	25.9312	16.1419	13.4453
ENSMUSG00000022351.14	Sqle	3562.94	0.640178	0.146624	4.36612	1.26e-05	0.00046452	68.4162	61.7064	93.9395	92.418
ENSMUSG00000046613.18	Vwa5b2	51.2284	-2.53506	0.580773	-4.36498	1.27e-05	0.000465994	1.41093	1.61891	0.258655	0.230894
ENSMUSG00000040653.5	Ppp1r14c	117.362	-1.86223	0.426737	-4.36389	1.28e-05	0.000467357	3.87908	5.45524	1.1863	1.20619
ENSMUSG00000086141.7	9030622O22Rik	75.0874	2.53267	0.580506	4.36287	1.28e-05	0.000468586	0.880094	1.43304	4.93352	7.9332
ENSMUSG00000018750.14	Zbtb4	359.568	-1.07427	0.246548	-4.35725	1.32e-05	0.000477838	4.3072	3.75584	1.71452	1.79693
ENSMUSG00000026980.15	Ly75	784.854	1.10626	0.253842	4.35807	1.31e-05	0.000477838	5.40048	4.02432	10.7975	7.80863
ENSMUSG00000032083.8	Apoa1	1250.19	8.88598	2.03924	4.3575	1.32e-05	0.000477838	0.328905	0.32576	287.461	4.59564
ENSMUSG00000008398.14	Elk3	2418.48	-0.672049	0.154406	-4.35248	1.35e-05	0.000487347	49.0869	48.0946	29.5785	26.6324
ENSMUSG00000038526.14	Car14	1731.34	0.744029	0.171056	4.34962	1.36e-05	0.000492745	55.8604	50.3967	78.7773	84.5493
ENSMUSG00000035783.8	Acta2	4196.52	-0.720864	0.165869	-4.34597	1.39e-05	0.000499987	179.42	197.817	103.769	107.242
ENSMUSG00000029223.12	Uchl1	1898.99	-0.877296	0.202159	-4.33964	1.43e-05	0.000512674	177.054	153.762	73.8054	91.1721
ENSMUSG00000042842.10	Serpinb6b	98.1224	1.8868	0.434789	4.33958	1.43e-05	0.000512674	1.29519	1.15792	3.87537	4.45761
ENSMUSG00000038517.15	Tbkbp1	764.281	-0.897022	0.206914	-4.33524	1.46e-05	0.000521834	20.6704	19.1945	10.9226	8.80168
ENSMUSG00000018604.18	Tbx3	1415.78	-0.911407	0.210327	-4.33328	1.47e-05	0.000525459	31.2819	22.8361	14.0258	12.3326
ENSMUSG00000006403.12	Adamts4	216.572	-1.40993	0.325532	-4.33115	1.48e-05	0.000529235	5.59964	3.96461	1.73776	1.5448
ENSMUSG00000040093.15	Bmf	2241.08	-1.09697	0.253293	-4.33082	1.49e-05	0.000529235	59.2645	35.5406	19.993	20.4541
ENSMUSG00000044345.9	Marveld1	1127.24	-0.822786	0.1902	-4.32591	1.52e-05	0.000540082	30.4649	28.9096	17.0851	13.8715
ENSMUSG00000038005.14	2700029M09Rik	1941.8	0.670285	0.155346	4.31479	1.6e-05	0.000566854	99.8173	92.7131	143.292	138.507
ENSMUSG00000031453.15	Rasa3	1302.76	-0.852171	0.197556	-4.31357	1.61e-05	0.000568853	28.0968	27.2473	12.8662	15.2924
ENSMUSG00000021453.2	Gadd45g	203.646	-1.40668	0.326249	-4.31168	1.62e-05	0.000571475	21.4868	16.3398	7.25016	5.84232
ENSMUSG00000030606.8	Hapln3	155.009	1.59402	0.369687	4.3118	1.62e-05	0.000571475	1.26325	1.66558	4.314	3.9458
ENSMUSG00000025964.15	Adam23	296.272	-1.17404	0.272338	-4.31096	1.63e-05	0.000572186	10.6294	9.21432	3.77434	4.28452
ENSMUSG00000042282.4	Gucy2f	33.6868	5.05176	1.17221	4.30959	1.64e-05	0.00057462	0.042101	0	0.466369	0.479654
ENSMUSG00000025665.16	Rps6ka6	6249.42	0.988325	0.229582	4.30489	1.67e-05	0.000585798	78.2364	57.2686	105.72	139.81
ENSMUSG00000020806.15	Rhbdf2	271.845	-1.35134	0.314126	-4.30192	1.69e-05	0.000592547	9.68278	8.34769	2.74762	3.74233
ENSMUSG00000042258.13	Isl1	3207.68	0.860753	0.200287	4.2976	1.73e-05	0.000601834	68.2917	57.2832	93.0839	115.716
ENSMUSG00000061887.14	Ssbp3	7042.42	-0.987267	0.229725	-4.29761	1.73e-05	0.000601834	267.217	203.712	130.922	87.8323
ENSMUSG00000087497.7	2810001G20Rik	393.474	1.06051	0.24737	4.28715	1.81e-05	0.000629604	17.8639	18.5452	33.3786	36.5856
ENSMUSG00000027950.7	Chrnb2	203.094	-1.50672	0.351625	-4.28502	1.83e-05	0.000633524	3.53444	3.54815	1.41602	0.895837
ENSMUSG00000055407.13	Map6	286.011	-1.88626	0.44021	-4.2849	1.83e-05	0.000633524	5.47896	9.10484	2.47926	1.21735
ENSMUSG00000020312.11	Shc2	1309.15	-0.77174	0.180362	-4.27884	1.88e-05	0.000647245	34.8168	29.612	18.4588	16.2178
ENSMUSG00000021374.9	Nup153	6252.39	0.70516	0.16477	4.27968	1.87e-05	0.000647245	58.2241	60.3325	84.0307	93.8292
ENSMUSG00000050271.12	D8Ertd82e	1088.7	-0.77949	0.182159	-4.27917	1.88e-05	0.000647245	19.7101	17.6053	10.7065	9.30019
ENSMUSG00000070407.5	Hs3st3b1	904.44	0.792915	0.185492	4.27465	1.91e-05	0.000658251	9.29114	8.12651	14.0719	13.6158
ENSMUSG00000053024.14	Cntn2	284.595	-1.46483	0.342764	-4.27358	1.92e-05	0.000660146	6.37208	9.37564	2.43367	2.8773
ENSMUSG00000079015.2	Serpina1c	50.5436	3.64855	0.854313	4.27074	1.95e-05	0.000667328	0.291438	0.420057	6.3326	1.92655
ENSMUSG00000056870.9	Gulp1	1344.34	0.983283	0.230415	4.26745	1.98e-05	0.000675934	21.0789	17.8296	30.3086	40.048
ENSMUSG00000027931.12	Npr1	790.538	-0.875775	0.205361	-4.26456	2e-05	0.000683436	20.8524	21.9977	11.7216	9.82421
ENSMUSG00000069601.13	Ank3	2140.22	-0.718921	0.168862	-4.25744	2.07e-05	0.000704194	42.8571	39.3817	25.1033	20.9396
ENSMUSG00000037994.14	Slc9b2	73.2461	-2.29537	0.539376	-4.25561	2.08e-05	0.000708636	2.16684	3.58846	0.511593	0.580747
ENSMUSG00000042489.15	Clspn	2499.03	0.66981	0.157551	4.25139	2.12e-05	0.000720746	28.7861	29.2118	44.8595	40.2342
ENSMUSG00000048904.4	Neurog1	55.7872	-2.92297	0.687683	-4.25047	2.13e-05	0.000722341	3.32982	4.31238	0.69348	0.239836
ENSMUSG00000061086.12	Myl4	156.212	-2.12305	0.499586	-4.24962	2.14e-05	0.000723711	11.1184	24.701	3.75658	3.91425
ENSMUSG00000097072.7	Foxl2os	75.3988	-2.83883	0.668171	-4.24866	2.15e-05	0.000725442	4.13021	3.38317	0.76331	0.204758
ENSMUSG00000022096.14	Hr	33.8564	-3.12839	0.736562	-4.24729	2.16e-05	0.000728502	0.690231	0.704644	0.076098	0.071591
ENSMUSG00000034586.14	Hid1	330.286	-1.05071	0.247419	-4.24666	2.17e-05	0.000729161	13.3326	12.718	5.83798	5.74242
ENSMUSG00000033788.15	Dysf	866.754	-1.0364	0.244137	-4.24514	2.18e-05	0.000732741	13.1912	10.7088	6.31645	4.40826
ENSMUSG00000048489.12	8430408G22Rik	364.397	1.02579	0.241756	4.24311	2.2e-05	0.000738021	11.6079	11.6009	22.5106	21.0291
ENSMUSG00000043391.9	2510009E07Rik	576.865	-0.993529	0.23423	-4.24168	2.22e-05	0.000741337	9.21837	9.9074	4.98487	3.90076
ENSMUSG00000102976.5	Zc3h11a	1754.3	1.08951	0.256935	4.24042	2.23e-05	0.000744106	51.0768	44.837	116.763	71.3229
ENSMUSG00000027894.14	Slc6a17	361.412	-1.27769	0.301751	-4.23426	2.29e-05	0.000763353	5.94237	6.53533	2.88655	1.88952
ENSMUSG00000096722.1	Hmgb1-ps9	236.378	1.3249	0.313011	4.23277	2.31e-05	0.000767012	15.7231	11.4578	29.4629	32.1515
ENSMUSG00000054074.9	Skida1	284.894	-1.94171	0.458944	-4.23081	2.33e-05	0.000772266	34.334	14.4006	6.57126	4.88461
ENSMUSG00000001248.14	Gramd1a	2449.01	-0.759483	0.179587	-4.22905	2.35e-05	0.000776894	89.131	77.1024	50.0979	40.267
ENSMUSG00000015094.16	Npdc1	369.328	-1.0292	0.243631	-4.22444	2.4e-05	0.000791501	28.4078	28.0503	12.2669	13.1508
ENSMUSG00000032291.8	Crabp1	5306.12	-0.924404	0.218906	-4.22283	2.41e-05	0.0007957	522.138	592.291	321.582	222.138
ENSMUSG00000026343.6	Gpr39	29.8721	4.60666	1.09107	4.22216	2.42e-05	0.000796584	0	0.095993	1.62086	0.9468
ENSMUSG00000027525.17	Phactr3	376.42	-2.11222	0.500606	-4.21932	2.45e-05	0.000805191	15.2142	14.8381	5.03978	1.45699
ENSMUSG00000052727.5	Map1b	4599.27	-0.652417	0.15474	-4.21621	2.48e-05	0.000814865	29.9733	31.0916	17.5059	18.2697
ENSMUSG00000031969.15	Acad8	1197.76	-0.800383	0.189966	-4.21329	2.52e-05	0.00082396	58.2934	46.5783	27.8252	27.2914
ENSMUSG00000041453.12	Rpl21	5697.47	1.01911	0.242091	4.2096	2.56e-05	0.000835982	213.172	279.328	546.526	379.658
ENSMUSG00000028631.7	Kcnq4	60.1739	-2.25637	0.536248	-4.2077	2.58e-05	0.000841491	1.56509	1.69624	0.295716	0.334304
ENSMUSG00000031451.5	Gas6	180.399	-1.45519	0.345953	-4.20633	2.6e-05	0.000845057	7.71112	5.51342	2.12039	2.28042
ENSMUSG00000023411.11	Nfatc4	3551.17	-0.76269	0.181509	-4.20194	2.65e-05	0.000860043	89.8951	70.7554	47.1724	39.8067
ENSMUSG00000031928.14	Mre11a	2534.76	0.862933	0.205421	4.2008	2.66e-05	0.000862827	45.6587	44.819	88.7571	63.3254
ENSMUSG00000028834.13	Trim63	33.4448	-3.61291	0.86055	-4.19837	2.69e-05	0.000869174	2.74082	1.71474	0.248027	0.078727
ENSMUSG00000038418.7	Egr1	117.14	-1.75458	0.417926	-4.19831	2.69e-05	0.000869174	2.81033	2.38581	0.854938	0.56229
ENSMUSG00000066232.3	Ipo7	7707.08	0.810376	0.193248	4.19344	2.75e-05	0.00088644	124.545	107.306	165.071	207.428
ENSMUSG00000055639.16	Dach1	2069.17	-0.678877	0.162108	-4.18782	2.82e-05	0.00090705	33.5178	31.0921	19.8986	17.2642
ENSMUSG00000049537.10	Tecrl	308.903	1.61804	0.386475	4.18666	2.83e-05	0.000910046	2.91181	5.26751	10.3434	13.1886
ENSMUSG00000020679.11	Hnf1b	79.425	2.93099	0.70022	4.18582	2.84e-05	0.000911766	0.165247	0.780976	3.50272	3.66307
ENSMUSG00000004110.14	Cacna1e	43.7967	-2.94682	0.704238	-4.1844	2.86e-05	0.000915817	0.409543	0.262801	0.028244	0.050761
ENSMUSG00000058297.16	Spock2	836.136	-0.799539	0.191236	-4.18091	2.9e-05	0.00092832	13.8734	13.3383	6.97279	7.39731
ENSMUSG00000036202.15	Rif1	5125.77	1.03278	0.247238	4.17727	2.95e-05	0.000940679	62.8952	42.6004	84.3854	112.545
ENSMUSG00000106795.1	Gm43050	42.6538	3.90214	0.934178	4.17709	2.95e-05	0.000940679	0	1.09882	9.11986	9.54801
ENSMUSG00000015944.9	Gatsl2	1133.16	-0.945681	0.226457	-4.17599	2.97e-05	0.000943511	15.1015	11.7309	7.31276	5.48556
ENSMUSG00000020108.3	Ddit4	1504.84	-0.985707	0.236091	-4.17511	2.98e-05	0.000945504	64.1213	88.0334	37.4566	33.7674
ENSMUSG00000062961.6	Ccdc177	72.1165	-2.05835	0.493383	-4.17191	3.02e-05	0.000957162	1.51486	1.15212	0.288514	0.295457
ENSMUSG00000019929.15	Dcn	2674.39	1.21779	0.292056	4.16969	3.05e-05	0.000964797	43.589	65.5769	96.4967	137.905
ENSMUSG00000071658.4	Gng3	256.493	-1.23164	0.295653	-4.16584	3.1e-05	0.000979486	12.8459	14.4083	4.98254	5.69321
ENSMUSG00000028525.16	Pde4b	418.401	1.24451	0.299286	4.15826	3.21e-05	0.00101077	5.33363	6.1607	10.5539	14.56
ENSMUSG00000022367.7	Has2	1877.82	1.18926	0.286316	4.15366	3.27e-05	0.00102951	14.5223	20.0826	29.491	43.3166
ENSMUSG00000038065.13	Mturn	640.393	-0.862203	0.207741	-4.15038	3.32e-05	0.0010425	10.464	10.3235	5.05549	5.46603
ENSMUSG00000031673.5	Cdh11	12331.9	0.836106	0.201472	4.14997	3.33e-05	0.00104252	122.592	147.262	202.176	241.655
ENSMUSG00000023007.15	Prpf40b	1055.32	-0.837401	0.201825	-4.14914	3.34e-05	0.00104449	41.6969	35.6813	22.1416	17.7075
ENSMUSG00000030226.12	Lmo3	105.739	-1.6486	0.397403	-4.14844	3.35e-05	0.00104585	3.94292	3.47273	1.10742	1.08024
ENSMUSG00000093954.8	Gm16867	80.2611	-2.58132	0.622322	-4.14788	3.36e-05	0.00104655	4.68505	3.80697	1.00049	0.313315
ENSMUSG00000034168.6	Irf2bpl	1078.29	-1.00189	0.241611	-4.14672	3.37e-05	0.00105006	22.9951	22.0815	12.5105	8.29155
ENSMUSG00000091625.8	Lsm5	655.432	-0.956372	0.230691	-4.14568	3.39e-05	0.00105296	97.2779	117.995	52.7117	49.9739
ENSMUSG00000056174.8	Col8a2	597.677	-1.44876	0.349517	-4.14504	3.4e-05	0.00105406	9.10905	16.8889	4.25492	4.603
ENSMUSG00000030683.11	Sez6l2	107.161	-2.78604	0.672491	-4.14286	3.43e-05	0.0010623	5.20019	2.69651	0.830167	0.215035
ENSMUSG00000024304.14	Cdh2	4938.58	-0.613349	0.148106	-4.14128	3.45e-05	0.00106777	85.9177	74.1245	48.9033	47.1994
ENSMUSG00000030123.15	Plxnd1	5326.2	-0.790855	0.191445	-4.13097	3.61e-05	0.00111488	64.9998	68.1933	40.8545	30.3031
ENSMUSG00000079560.13	Hoxa3	1152.08	-0.918752	0.222507	-4.12909	3.64e-05	0.0011221	43.8854	33.4656	21.1346	16.4247
ENSMUSG00000022822.15	Abcc5	2475.62	-0.716609	0.17362	-4.12746	3.67e-05	0.00112786	65.0594	61.5254	39.329	31.6659
ENSMUSG00000032269.7	Htr3a	65.4804	-3.59987	0.872249	-4.12711	3.67e-05	0.00112786	3.17131	4.29129	0.530658	0.048182
ENSMUSG00000022025.13	Lect1	20.7125	-4.53695	1.09999	-4.12455	3.71e-05	0.00113851	1.99789	1.73779	0.077354	0.070473
ENSMUSG00000023886.9	Smoc2	812.951	0.897185	0.217696	4.12128	3.77e-05	0.00115085	12.8285	12.9712	25.0888	19.3425
ENSMUSG00000032531.15	Amotl2	3034.95	-0.637878	0.154773	-4.12136	3.77e-05	0.00115085	61.8177	54.7105	36.3996	32.4683
ENSMUSG00000025647.16	Shisa5	851.617	-0.842193	0.204489	-4.11852	3.81e-05	0.00116074	52.1111	50.2198	29.2987	23.37
ENSMUSG00000052516.17	Robo2	1782.99	1.17709	0.285785	4.11879	3.81e-05	0.00116074	11.8708	17.8142	26.5134	35.4934
ENSMUSG00000045932.12	Ifit2	652.847	1.11176	0.270192	4.11469	3.88e-05	0.00117813	6.68689	7.22228	11.5553	16.0801
ENSMUSG00000038528.14	BC021785	20.7371	7.61826	1.85293	4.11146	3.93e-05	0.00119271	0	0	2.23572	0.471797
ENSMUSG00000026994.9	Galnt3	839.606	-1.63528	0.397901	-4.10977	3.96e-05	0.00119942	28.706	22.6722	11.0422	4.26383
ENSMUSG00000054618.8	Gm9951	16.7394	7.30637	1.7783	4.10863	3.98e-05	0.00120331	0	0	1.33022	0.909186
ENSMUSG00000022658.10	Tagln3	720.005	-0.94887	0.231115	-4.10561	4.03e-05	0.00121707	44.1809	53.9787	25.116	22.0369
ENSMUSG00000031073.5	Fgf15	95.1743	-1.74081	0.424802	-4.09793	4.17e-05	0.00125605	5.02541	5.37697	1.54106	1.33793
ENSMUSG00000055053.17	Nfic	706.399	-0.83389	0.203541	-4.09691	4.19e-05	0.00125942	15.8074	13.1587	7.71239	7.21054
ENSMUSG00000001630.13	Stk38l	700.9	1.02827	0.251028	4.09622	4.2e-05	0.00126105	7.69461	5.60557	11.2578	13.437
ENSMUSG00000022621.16	Rabl2	578.679	-0.860355	0.210111	-4.09475	4.23e-05	0.00126693	33.6625	34.8728	18.2055	16.6507
ENSMUSG00000026797.15	Stxbp1	1012.87	-0.881297	0.215646	-4.08679	4.37e-05	0.00130901	24.203	20.9518	12.9003	9.66337
ENSMUSG00000025427.14	Rnf165	819.602	-0.773775	0.189437	-4.08461	4.42e-05	0.0013191	15.8144	14.1179	8.43098	7.65731
ENSMUSG00000036611.5	Eepd1	230.062	-1.18977	0.291393	-4.08306	4.44e-05	0.00132352	8.24209	6.93344	3.23644	2.88336
ENSMUSG00000039116.4	Adgrg6	328.272	-1.13476	0.277911	-4.08317	4.44e-05	0.00132352	4.79503	4.15423	1.6648	2.06244
ENSMUSG00000029919.5	Hpgds	116.39	1.80752	0.443093	4.07932	4.52e-05	0.0013427	1.25631	1.84737	4.44298	5.48807
ENSMUSG00000022957.19	Itsn1	3532.17	-0.626525	0.153691	-4.07653	4.57e-05	0.00135663	70.4718	60.2055	39.5951	38.1523
ENSMUSG00000034687.8	Fras1	4138.57	0.582228	0.142958	4.07273	4.65e-05	0.00137666	14.4601	13.8216	19.5314	19.4229
ENSMUSG00000041119.11	Pde9a	646.552	1.054	0.258927	4.07066	4.69e-05	0.00138667	16.2268	18.3782	28.7747	37.41
ENSMUSG00000063884.6	Ptcd3	4153.57	0.639237	0.157113	4.06864	4.73e-05	0.0013964	99.8101	97.3284	135.331	147.011
ENSMUSG00000041789.7	2700046A07Rik	48.729	2.9788	0.732436	4.06698	4.76e-05	0.00140407	0.213847	0.687753	3.25155	3.58805
ENSMUSG00000031543.18	Ank1	576.4	0.857626	0.21104	4.0638	4.83e-05	0.00141862	5.48675	5.62461	9.22815	9.3448
ENSMUSG00000079277.9	Hoxd3	749.392	-0.787841	0.19386	-4.06396	4.82e-05	0.00141862	24.3828	22.8325	12.3265	12.8029
ENSMUSG00000027546.15	Atp9a	962.825	-0.846197	0.208402	-4.06041	4.9e-05	0.00143463	26.2496	19.9458	11.9603	11.5626
ENSMUSG00000030849.17	Fgfr2	2468.5	0.770652	0.189788	4.0606	4.89e-05	0.00143463	42.1088	33.195	55.6578	61.9507
ENSMUSG00000034295.9	Fhod3	327.552	-1.1147	0.27477	-4.05683	4.97e-05	0.00145441	6.03323	4.69279	2.4962	2.04305
ENSMUSG00000027257.13	Pacsin3	543.502	-1.16727	0.287853	-4.0551	5.01e-05	0.0014628	49.4292	33.8335	14.7482	19.0511
ENSMUSG00000028780.13	Sema3c	3864.42	0.936082	0.231033	4.05173	5.08e-05	0.00148162	33.99	31.3549	47.0418	67.4628
ENSMUSG00000025089.15	Gfra1	1569.73	-0.784404	0.193643	-4.05077	5.1e-05	0.00148526	34.482	37.8268	21.4081	17.4037
ENSMUSG00000026185.8	Igfbp5	46713.7	-0.837437	0.206905	-4.04744	5.18e-05	0.00149677	778.36	518.939	336.637	328.182
ENSMUSG00000041773.7	Enc1	1807.7	-0.741237	0.183136	-4.04748	5.18e-05	0.00149677	34.3546	27.3281	17.8918	15.9596
ENSMUSG00000062991.6	Nrg1	95.0803	-1.70101	0.420242	-4.0477	5.17e-05	0.00149677	4.39604	4.50098	1.30244	1.22853
ENSMUSG00000106736.1	Gm42573	370.852	1.02228	0.252528	4.0482	5.16e-05	0.00149677	36.8643	29.4432	61.4076	61.7065
ENSMUSG00000082127.2	Gm13577	221.302	1.38084	0.341364	4.04507	5.23e-05	0.00150953	47.5184	30.922	86.548	97.5328
ENSMUSG00000027009.18	Itga4	1972.1	1.07555	0.266018	4.04314	5.27e-05	0.00151952	9.39706	8.43449	13.3762	21.0073
ENSMUSG00000042498.16	D330045A20Rik	204.731	1.42017	0.351589	4.03929	5.36e-05	0.00154219	2.38226	1.52499	4.49539	4.92427
ENSMUSG00000058254.12	Tspan7	1321.85	-0.735034	0.182131	-4.03574	5.44e-05	0.00156318	62.4402	55.2031	35.367	29.6719
ENSMUSG00000079654.3	Prrt4	84.8099	-1.81974	0.450974	-4.03512	5.46e-05	0.0015648	2.68263	2.33162	0.728439	0.574953
ENSMUSG00000030207.15	Fam234b	712.65	-0.93818	0.232606	-4.03335	5.5e-05	0.00157411	16.9321	12.254	7.0014	6.92719
ENSMUSG00000042029.6	Ncapg2	2758.17	0.923992	0.229343	4.02886	5.6e-05	0.00160188	21.0986	16.2081	27.8075	36.841
ENSMUSG00000037010.7	Apln	176.415	-1.38783	0.344653	-4.02675	5.66e-05	0.00161369	5.73092	4.76387	2.12919	1.5543
ENSMUSG00000055322.14	Tns1	1707.13	-0.945277	0.234874	-4.02461	5.71e-05	0.00162585	24.2634	16.4844	10.7958	8.59705
ENSMUSG00000030500.5	Slc17a6	49.2677	-2.83358	0.70454	-4.02189	5.77e-05	0.00164211	1.07812	1.48737	0.241496	0.093528
ENSMUSG00000004098.7	Col5a3	76.924	-2.07816	0.51715	-4.01849	5.86e-05	0.00165803	1.30022	1.32261	0.373848	0.205638
ENSMUSG00000022836.10	Mylk	676.661	0.914301	0.227506	4.0188	5.85e-05	0.00165803	4.0999	3.74529	6.15281	7.40288
ENSMUSG00000029093.14	Sorcs2	896.29	0.780755	0.194289	4.01852	5.86e-05	0.00165803	7.49156	8.02523	12.1614	12.4552
ENSMUSG00000036446.4	Lum	543.18	1.21253	0.3019	4.01633	5.91e-05	0.0016706	9.20181	10.9925	17.5427	25.7073
ENSMUSG00000018411.17	Mapt	75.5677	-2.26218	0.563301	-4.01593	5.92e-05	0.0016708	3.80383	2.83822	0.871899	0.408255
ENSMUSG00000020469.8	Myl7	209.626	-2.1605	0.538126	-4.01485	5.95e-05	0.0016758	18.7298	55.0629	7.99513	7.4619
ENSMUSG00000035640.18	Cbarp	550.821	-0.886262	0.22079	-4.01406	5.97e-05	0.00167881	22.1591	24.5487	11.9784	11.381
ENSMUSG00000045827.10	Serpinb9	222.555	1.69682	0.422879	4.01253	6.01e-05	0.00168703	1.37703	2.44167	4.79785	6.81371
ENSMUSG00000031939.15	Taf1d	1761.68	0.772859	0.192659	4.01153	6.03e-05	0.0016915	69.7652	57.5852	92.931	106.212
ENSMUSG00000024451.8	Arap3	1208.16	-0.770547	0.192228	-4.00851	6.11e-05	0.0017106	18.1983	19.3268	11.1114	9.20816
ENSMUSG00000032411.15	Tfdp2	693.175	0.891997	0.222587	4.00741	6.14e-05	0.00171586	18.1382	15.17	26.2699	30.1653
ENSMUSG00000030521.11	Mphosph10	2234.5	0.766184	0.191558	3.99975	6.34e-05	0.00176961	52.4381	46.2619	69.9507	83.8978
ENSMUSG00000038375.15	Trp53inp2	1611.8	-0.693673	0.173466	-3.9989	6.36e-05	0.00177319	36.3225	32.3356	21.0841	17.9684
ENSMUSG00000032549.7	Rab6b	187.854	-1.72138	0.430665	-3.99704	6.41e-05	0.0017844	3.88787	4.35417	1.58481	0.756577
ENSMUSG00000018547.8	Pip4k2b	2550.33	-0.723011	0.180923	-3.99624	6.44e-05	0.0017848	42.4664	39.6863	25.7795	20.0991
ENSMUSG00000024256.6	Adcyap1	37.0365	-3.09409	0.774207	-3.99646	6.43e-05	0.0017848	1.47241	2.579	0.277517	0.169279
ENSMUSG00000031709.15	Tbc1d9	372.954	-1.08808	0.272366	-3.9949	6.47e-05	0.00178775	8.72093	6.2564	3.28941	3.14306
ENSMUSG00000035401.9	2210018M11Rik	3484.26	0.661637	0.165627	3.99474	6.48e-05	0.00178775	56.3523	46.3558	73.3003	75.5924
ENSMUSG00000036699.12	Zcchc12	209.549	-1.30019	0.325471	-3.99478	6.48e-05	0.00178775	8.02746	9.38785	2.98564	3.54887
ENSMUSG00000022261.5	Sdc2	1832.75	0.884456	0.221433	3.99424	6.49e-05	0.00178838	23.449	26.3948	37.2154	47.4727
ENSMUSG00000041075.8	Fzd7	3028.46	-0.744856	0.186497	-3.99393	6.5e-05	0.00178838	59.7901	48.3779	32.9231	26.4277
ENSMUSG00000019874.11	Fabp7	176.592	-1.30354	0.326535	-3.99202	6.55e-05	0.0018	22.3964	17.9756	7.70253	7.21122
ENSMUSG00000034908.15	Sidt2	1737.69	-0.653868	0.163825	-3.99125	6.57e-05	0.0018031	48.8086	45.0107	26.8669	27.9173
ENSMUSG00000004356.7	Utp20	3774.16	0.634404	0.159201	3.98491	6.75e-05	0.00184905	21.9562	21.2032	29.4285	32.1635
ENSMUSG00000071553.10	Cpa2	451.961	1.50943	0.378896	3.98376	6.78e-05	0.00185522	17.9162	9.03241	28.373	40.7039
ENSMUSG00000048015.3	Neurod4	397.635	-3.87132	0.97224	-3.98186	6.84e-05	0.00186723	16.2834	12.4841	1.50676	0.315483
ENSMUSG00000021775.10	Nr1d2	557.29	0.861883	0.216488	3.9812	6.86e-05	0.00186955	5.78895	5.77472	9.36051	10.0032
ENSMUSG00000025352.6	Gdf11	1569.18	-0.768956	0.193204	-3.98002	6.89e-05	0.00187309	35.3864	27.5841	18.1358	15.7765
ENSMUSG00000078495.10	Gm13157	957.75	0.909733	0.228596	3.97966	6.9e-05	0.00187309	19.3137	14.1171	27.0194	30.3148
ENSMUSG00000094439.1	Gm21969	20.0329	-5.49748	1.38139	-3.97968	6.9e-05	0.00187309	0.551193	0.603254	0.022706	0
ENSMUSG00000090231.10	Cfb	195.277	2.31149	0.581464	3.97529	7.03e-05	0.00190487	2.13693	1.63679	13.5723	3.74243
ENSMUSG00000055531.12	Cpsf6	8980.57	0.868532	0.218568	3.97373	7.08e-05	0.00191448	87.4726	108.956	147.032	183.531
ENSMUSG00000053747.9	Sox14	23.6517	-5.72306	1.44305	-3.96594	7.31e-05	0.00197511	2.26081	0.674245	0	0.048904
ENSMUSG00000026821.15	Ralgds	1211.86	-0.692677	0.174731	-3.96426	7.36e-05	0.00198308	34.5993	34.0599	20.7767	18.3811
ENSMUSG00000046782.14	4921506M07Rik	157.195	1.91396	0.482781	3.96445	7.36e-05	0.00198308	0.613176	1.27755	2.84022	3.82516
ENSMUSG00000026955.13	Sapcd2	610.678	-1.03637	0.261705	-3.96006	7.49e-05	0.00201505	29.8086	38.9929	17.26	13.9397
ENSMUSG00000035189.16	Ano4	357.846	1.95406	0.493485	3.95972	7.5e-05	0.00201505	1.26565	3.91723	8.93401	9.96498
ENSMUSG00000024172.10	St6gal2	695.945	0.884759	0.223723	3.95471	7.66e-05	0.00205458	6.41792	5.03074	9.2204	10.0466
ENSMUSG00000025738.7	Fbxl16	261.234	-1.26393	0.31963	-3.95435	7.67e-05	0.0020546	7.30608	6.38538	3.17053	2.09213
ENSMUSG00000044548.11	Dact1	3253.99	-0.644376	0.162972	-3.95392	7.69e-05	0.00205525	78.8849	67.3213	46.0724	39.9375
ENSMUSG00000026880.11	Stom	765.593	-0.761462	0.192751	-3.9505	7.8e-05	0.0020817	24.2313	21.9496	12.3636	12.6648
ENSMUSG00000084129.1	Hmgb1-ps1	791.713	0.818544	0.207222	3.95009	7.81e-05	0.00208215	59.3047	57.1113	88.3594	100.443
ENSMUSG00000071178.11	Serpina1b	82.1745	2.98868	0.75688	3.94868	7.86e-05	0.0020913	0.798672	0.653401	8.59027	1.97485
ENSMUSG00000020393.16	Kremen1	1030.13	-0.859627	0.217917	-3.94474	7.99e-05	0.00212275	20.7594	15.0404	9.21995	8.83982
ENSMUSG00000002885.14	Adgre5	512.012	-1.08634	0.275515	-3.94293	8.05e-05	0.00213252	27.3591	17.7515	9.80967	9.51626
ENSMUSG00000016984.7	Etaa1	2290.03	0.76	0.192739	3.94316	8.04e-05	0.00213252	27.6442	24.7938	36.8115	44.6032
ENSMUSG00000048450.10	Msx1	923.612	-3.03218	0.769649	-3.93969	8.16e-05	0.00215828	74.6382	36.3077	9.01856	3.46725
ENSMUSG00000041609.16	Ccdc64	175.985	-1.24779	0.317144	-3.93446	8.34e-05	0.00220251	8.85873	8.15202	3.44016	3.12941
ENSMUSG00000021149.7	Gtpbp4	5968.95	0.648947	0.165037	3.93214	8.42e-05	0.00222064	100.638	100.493	135.854	154.117
ENSMUSG00000032841.15	Prr5l	512.509	-0.874372	0.222425	-3.93108	8.46e-05	0.00222538	12.5088	12.0601	6.73147	5.62466
ENSMUSG00000038736.9	Nudcd1	1888.99	0.824522	0.209753	3.93091	8.46e-05	0.00222538	26.5501	24.4622	36.3224	46.516
ENSMUSG00000024427.6	Spry4	273.463	-1.59594	0.406151	-3.92943	8.51e-05	0.00222927	5.45104	6.07574	2.42607	1.11973
ENSMUSG00000024598.8	Fbn2	10730.6	0.544552	0.138591	3.92919	8.52e-05	0.00222927	53.263	54.0106	73.2528	70.8744
ENSMUSG00000029730.16	Mcm7	11509.4	0.568836	0.144775	3.9291	8.53e-05	0.00222927	214.209	225.349	309.706	291.373
ENSMUSG00000090602.2	Gm5611	1331.05	0.749149	0.190668	3.92907	8.53e-05	0.00222927	85.7822	71.053	131.556	110.428
ENSMUSG00000048349.9	Pou4f1	51.6075	-2.35303	0.599152	-3.92726	8.59e-05	0.00224288	1.12278	1.37003	0.271626	0.186179
ENSMUSG00000000902.13	Smarcb1	3417.63	-0.626641	0.159777	-3.92197	8.78e-05	0.00228264	151.796	139.524	82.9248	90.3713
ENSMUSG00000032181.6	Scg3	170.624	-1.58056	0.402964	-3.92234	8.77e-05	0.00228264	6.82808	7.76808	2.90719	1.64932
ENSMUSG00000083899.2	Gm12346	9905.39	0.668367	0.170412	3.92206	8.78e-05	0.00228264	223.228	214.138	292.822	345.462
ENSMUSG00000036990.13	Otud4	5015.94	0.585799	0.149425	3.92037	8.84e-05	0.0022945	41.204	37.7989	53.0632	55.8759
ENSMUSG00000045287.6	Rtn4rl1	98.2839	-1.64099	0.418805	-3.91826	8.92e-05	0.00231072	2.5846	2.84559	0.789644	0.821862
ENSMUSG00000047842.6	Diras2	69.5517	-2.38504	0.608745	-3.91797	8.93e-05	0.00231072	2.43424	1.0611	0.308781	0.304029
ENSMUSG00000012422.14	Tmem167	5974.76	0.70176	0.179393	3.91185	9.16e-05	0.00236661	34.4711	36.8753	49.2544	57.52
ENSMUSG00000025777.8	Gdap1	63.068	-2.12349	0.543014	-3.91056	9.21e-05	0.00237586	1.6324	1.81327	0.444881	0.288327
ENSMUSG00000038119.14	Cdon	1450.67	-0.988397	0.253121	-3.90484	9.43e-05	0.00242922	22.0887	15.5246	10.2679	7.16838
ENSMUSG00000020886.16	Dlg4	1002.74	-1.23608	0.316949	-3.89992	9.62e-05	0.0024755	67.8056	35.4314	22.454	17.4306
ENSMUSG00000042367.12	Gjb3	109.334	-1.69897	0.435875	-3.89784	9.71e-05	0.00249326	6.70455	4.7978	1.89902	1.33897
ENSMUSG00000031731.16	Ap1g1	5417.36	0.566944	0.145566	3.89476	9.83e-05	0.00252156	53.2914	46.734	68.4541	67.6662
ENSMUSG00000096942.1	Rps19-ps6	2814.47	0.688235	0.176825	3.89219	9.93e-05	0.00254474	296.233	336.271	498.914	443.185
ENSMUSG00000027217.13	Tspan18	1028.18	-0.973766	0.250314	-3.89017	0.000100174	0.00255494	25.3855	26.6313	14.8375	9.68489
ENSMUSG00000029754.13	Dlx6	168.153	-2.17986	0.560279	-3.89067	0.0001	0.00255494	16.257	10.7716	4.23017	1.29645
ENSMUSG00000035299.16	Mid1	1353.9	0.868438	0.223228	3.89037	0.000100092	0.00255494	17.0147	20.1652	35.7633	27.2149
ENSMUSG00000028439.14	Fam219a	252.331	-1.31367	0.337969	-3.88695	0.000101511	0.00258408	7.54896	7.79231	3.52655	2.17299
ENSMUSG00000040699.13	Limd2	4288.71	-0.562486	0.14472	-3.88672	0.000101607	0.00258408	130.63	117.527	80.2612	74.2775
ENSMUSG00000020695.14	Mrc2	2933.99	-0.668711	0.17211	-3.88537	0.000102173	0.00259475	47.3453	42.7125	28.8889	23.3035
ENSMUSG00000067786.16	Nnat	7580.84	-0.821954	0.211628	-3.88396	0.000102769	0.00260616	702.843	948.701	445.448	418.964
ENSMUSG00000096210.1	H1f0	9467.67	-0.556156	0.143234	-3.88285	0.000103241	0.00261441	340.158	295.949	206.877	190.841
ENSMUSG00000047446.18	Arl4a	897.41	1.15827	0.298558	3.87954	0.000104654	0.00264643	10.5384	16.591	32.0018	24.3126
ENSMUSG00000024593.15	Megf10	554.7	-0.867997	0.223777	-3.87885	0.000104953	0.00265021	6.37363	6.40605	3.56896	2.89393
ENSMUSG00000032423.12	Syncrip	11811.4	1.01087	0.260942	3.87393	0.000107092	0.0027004	78.5963	66.9162	102.364	165.608
ENSMUSG00000038267.14	Slc22a23	660.002	-0.845335	0.218482	-3.86913	0.000109226	0.00275029	10.6561	10.031	5.94553	4.66463
ENSMUSG00000032744.4	Heyl	831.591	-0.765913	0.19801	-3.86805	0.000109707	0.0027585	14.6667	15.2941	8.75353	7.52041
ENSMUSG00000044562.10	Rasip1	735.61	-0.908268	0.234843	-3.86755	0.000109934	0.00276031	17.3163	21.1771	10.3356	8.66883
ENSMUSG00000039037.5	St6galnac5	150.69	-1.41383	0.365597	-3.86718	0.000110102	0.00276062	2.90567	2.56092	1.10737	0.78614
ENSMUSG00000021701.7	Plk2	3680.84	-0.69529	0.179885	-3.86519	0.000111001	0.00277926	118.065	91.9413	57.7606	61.072
ENSMUSG00000034993.7	Vat1	1384.92	-0.706803	0.182919	-3.86402	0.000111534	0.0027874	39.6957	40.2859	24.7254	20.5037
ENSMUSG00000045005.9	Fzd5	296.405	1.04549	0.270587	3.86379	0.00011164	0.0027874	1.75246	1.92893	3.4696	3.56455
ENSMUSG00000027796.2	Smad9	508.007	0.969998	0.251312	3.85973	0.000113511	0.00283014	4.60468	3.67992	8.40168	6.47689
ENSMUSG00000037315.14	Jade3	1464.9	0.711927	0.184517	3.85834	0.000114162	0.00284238	15.2581	15.282	21.6621	24.3296
ENSMUSG00000033953.10	Ppp3r1	3405.71	0.58714	0.152248	3.85646	0.000115042	0.00286029	61.3698	63.7465	89.1034	84.2272
ENSMUSG00000030393.8	Zik1	2992.14	0.78661	0.204175	3.85262	0.00011686	0.00290143	33.9208	33.4462	46.6424	60.0583
ENSMUSG00000021824.12	Ap3m1	4075.19	0.74503	0.193439	3.8515	0.000117398	0.00291071	38.9227	31.7087	61.7757	47.1196
ENSMUSG00000032068.14	Plet1	246.212	-1.9125	0.496659	-3.85072	0.000117771	0.00291589	15.6181	14.3758	5.56956	1.8308
ENSMUSG00000020863.15	Luc7l3	9851.39	0.668713	0.173675	3.85038	0.000117936	0.00291592	182.252	150.119	226.602	257.619
ENSMUSG00000009378.3	Slc16a12	260.958	1.86725	0.485595	3.84528	0.000120417	0.002969	1.03615	2.4488	4.61994	7.35884
ENSMUSG00000028248.15	Pnisr	6930.96	0.795041	0.206741	3.84559	0.000120263	0.002969	121.466	92.7536	152.014	187.995
ENSMUSG00000057541.14	Pus7	1339.08	0.856266	0.222705	3.84484	0.000120629	0.00297012	22.605	24.2374	34.2514	43.8246
ENSMUSG00000031838.7	Ifi30	573.907	1.12489	0.292665	3.84362	0.000121235	0.0029809	24.344	23.0241	59.5	36.1298
ENSMUSG00000091183.5	Gm5141	307.323	0.97349	0.253472	3.84062	0.000122726	0.00301341	5.59362	5.22911	9.94968	9.58813
ENSMUSG00000059022.14	Kcp	887.119	-1.26404	0.329336	-3.83815	0.000123962	0.00303956	47.3566	32.4395	19.9573	10.6717
ENSMUSG00000018593.12	Sparc	11422	-0.51008	0.132944	-3.8368	0.00012465	0.00305221	411.886	390.634	265.554	253.042
ENSMUSG00000043168.12	4930426D05Rik	118.904	-3.01508	0.785953	-3.8362	0.000124951	0.00305271	17.3825	3.24997	1.67933	0.665312
ENSMUSG00000049928.15	Glp2r	27.6825	3.75431	0.978683	3.83608	0.000125014	0.00305271	0.069545	0.039537	0.429321	0.849616
ENSMUSG00000004655.5	Aqp1	169.324	-1.39466	0.363726	-3.83436	0.00012589	0.00306989	5.62475	6.36394	1.80285	2.40057
ENSMUSG00000028517.8	Ppap2b	2382.65	-0.605838	0.158017	-3.83401	0.000126071	0.00307009	59.7908	57.5416	37.9181	33.1156
ENSMUSG00000039081.9	Zfp503	3752.13	-0.830084	0.21653	-3.83357	0.000126297	0.00307139	85.1045	62.3851	43.5592	32.6884
ENSMUSG00000027460.7	Angpt4	56.589	2.18256	0.569535	3.83218	0.000127014	0.00308039	0.482926	0.615259	2.58081	2.17313
ENSMUSG00000093930.1	Hmgcs1	12323.7	0.766108	0.199897	3.83251	0.000126845	0.00308039	160.796	201.681	268.742	299.941
ENSMUSG00000019055.15	Plod1	1510.51	-0.696537	0.181814	-3.83105	0.000127597	0.00309031	36.4428	37.9416	23.0767	19.3113
ENSMUSG00000024299.16	Adamts10	1943.78	-0.701285	0.183197	-3.82803	0.000129171	0.00312419	52.0393	41.052	27.7265	24.7855
ENSMUSG00000001493.9	Meox1	911.645	-0.733983	0.19176	-3.82762	0.000129389	0.00312521	35.9746	30.069	18.9391	17.4896
ENSMUSG00000039485.7	Tspyl4	1764.19	-0.609789	0.159381	-3.82599	0.000130249	0.00314171	35.629	35.1525	21.4791	21.2254
ENSMUSG00000046844.6	Vat1l	455.441	-0.94967	0.248484	-3.82185	0.000132452	0.00319052	11.2887	12.6061	6.35878	5.10619
ENSMUSG00000010529.5	Gm266	671.053	-0.843737	0.220989	-3.81801	0.000134532	0.00323624	42.7025	48.6276	25.25	21.8686
ENSMUSG00000037362.8	Nov	116.358	-1.59041	0.416687	-3.8168	0.000135193	0.00324773	3.32283	4.4581	1.1707	1.22963
ENSMUSG00000056220.14	Pla2g4a	645.362	1.02824	0.269437	3.81624	0.000135502	0.00325077	11.2181	8.08094	15.7194	20.0961
ENSMUSG00000041762.16	Gpr155	122.575	1.88238	0.493435	3.81485	0.000136263	0.00326462	0.7174	0.891052	1.94966	3.58743
ENSMUSG00000031103.12	Elf4	443.654	-0.87153	0.228494	-3.81423	0.000136607	0.00326845	5.90389	6.2295	3.12118	2.99039
ENSMUSG00000043673.10	Kcns3	160.118	1.56084	0.409422	3.8123	0.000137678	0.00328965	1.43267	2.0648	5.78097	3.95673
ENSMUSG00000032564.15	Cpne4	83.8351	-2.40125	0.630052	-3.8112	0.000138295	0.00329744	3.2901	1.36286	0.528713	0.265455
ENSMUSG00000046230.9	Vps13a	1084.06	1.14306	0.299959	3.81072	0.000138561	0.00329744	5.36233	3.71531	7.14576	11.0799
ENSMUSG00000059013.12	Sh2d3c	1035	-0.81387	0.213556	-3.81104	0.000138384	0.00329744	35.6193	27.6179	18.1369	14.8795
ENSMUSG00000100826.6	Snhg14	1105.38	1.33628	0.350885	3.8083	0.000139923	0.00332543	0.2673	0.19762	0.301178	0.175181
ENSMUSG00000062960.10	Kdr	3295.03	-0.721548	0.189566	-3.80632	0.000141052	0.00334776	40.6343	49.4621	25.4675	25.0197
ENSMUSG00000025020.11	Slit1	164.472	-1.74194	0.458405	-3.8	0.000144696	0.00342969	2.79253	4.57164	1.30239	0.75083
ENSMUSG00000030074.9	Gxylt2	293.335	-1.09942	0.289437	-3.79848	0.000145585	0.00344617	4.64203	3.82369	1.62739	1.99172
ENSMUSG00000027804.13	Ppid	6597.55	0.844316	0.222336	3.79748	0.000146177	0.00345557	127.613	143.293	189.608	257.533
ENSMUSG00000037236.14	Matr3	16063.9	0.983954	0.259237	3.79559	0.000147296	0.00347739	185.09	120.176	230.267	320.22
ENSMUSG00000027495.4	Fam210b	1204.07	0.651953	0.171876	3.79315	0.000148747	0.00350235	17.2295	16.1551	24.0078	24.2337
ENSMUSG00000066894.14	Vsig10	332.285	-1.38605	0.36538	-3.79345	0.000148571	0.00350235	11.7597	6.26713	3.55971	2.71287
ENSMUSG00000004113.18	Cacna1b	155.186	-1.52456	0.40217	-3.79083	0.000150143	0.00353054	1.82673	1.24439	0.588255	0.388624
ENSMUSG00000016087.13	Fli1	2290.46	-0.642051	0.169427	-3.78954	0.000150926	0.00354426	59.6565	55.4682	32.1084	35.6503
ENSMUSG00000047146.15	Tet1	1527.7	0.670466	0.177014	3.78765	0.000152078	0.00356661	8.08949	8.85864	12.6689	12.235
ENSMUSG00000078502.10	Gm13212	675.392	0.870265	0.230011	3.78358	0.000154591	0.00362078	9.47999	8.13515	13.3999	16.0697
ENSMUSG00000020609.14	Apob	5714.39	8.19947	2.16778	3.78243	0.000155307	0.00363275	0.203843	0.161913	100.398	0.710885
ENSMUSG00000026676.7	Ccdc3	85.0964	-1.72643	0.456541	-3.78153	0.000155864	0.003641	3.02009	3.25893	0.786287	0.968818
ENSMUSG00000027200.17	Sema6d	693.786	-0.83521	0.221094	-3.77762	0.000158331	0.00369378	10.8248	12.1191	5.6325	6.22948
ENSMUSG00000020388.12	Pdlim4	544.329	0.798289	0.211358	3.77696	0.000158756	0.00369884	21.6851	21.655	34.8419	34.5599
ENSMUSG00000028478.18	Clta	4086.79	-0.596775	0.158034	-3.77625	0.00015921	0.00370455	292.326	282.283	166.819	182.495
ENSMUSG00000078794.4	Dact3	2519.2	-0.645397	0.17108	-3.77249	0.000161628	0.0037559	70.3453	62.3511	42.8012	35.2874
ENSMUSG00000021087.17	Rtn1	395.993	-1.76964	0.469379	-3.77017	0.000163139	0.00378113	25.9201	13.0667	7.49027	3.08659
ENSMUSG00000038916.6	Soga3	270.261	-1.14461	0.303585	-3.7703	0.000163049	0.00378113	6.37373	5.78857	2.99324	2.0795
ENSMUSG00000001288.14	Rarg	1505.31	-0.667647	0.177124	-3.76937	0.00016366	0.00378826	51.1341	42.2634	27.026	26.9045
ENSMUSG00000000359.3	Rem1	138.7	1.86088	0.493941	3.7674	0.000164955	0.00380243	1.40862	3.25474	7.71027	8.53089
ENSMUSG00000021536.7	Adcy2	68.075	-2.06721	0.548732	-3.76724	0.000165063	0.00380243	2.07215	1.29952	0.432665	0.298173
ENSMUSG00000028977.16	Casz1	132.755	-1.39818	0.371151	-3.76714	0.000165128	0.00380243	1.83256	1.71648	0.565473	0.673944
ENSMUSG00000031111.16	Igsf1	56.5932	-2.37003	0.629101	-3.76734	0.000164998	0.00380243	1.75662	1.93742	0.223229	0.456477
ENSMUSG00000026692.12	Fmo4	20.4389	7.59408	2.01625	3.76643	0.000165599	0.00380835	0	0	1.73617	0.131488
ENSMUSG00000033900.13	Map9	771.354	0.903518	0.239945	3.76551	0.000166206	0.00381738	5.6855	5.68438	8.51079	11.0295
ENSMUSG00000006678.6	Pola1	3703.75	0.768668	0.204203	3.76423	0.000167064	0.00383213	35.0007	31.3006	45.081	58.4023
ENSMUSG00000052698.14	Tln2	2769.92	-0.569458	0.151352	-3.76248	0.000168238	0.00385408	18.5747	16.6295	11.3188	10.4936
ENSMUSG00000059475.13	Zfp426	1197.71	0.936234	0.249065	3.75899	0.000170602	0.00390321	17.4527	23.4059	33.1563	39.1459
ENSMUSG00000096225.7	Lhx8	190.801	-1.70811	0.454613	-3.75729	0.000171764	0.00392473	12.5517	10.7139	4.62227	1.95709
ENSMUSG00000024087.3	Cyp1b1	845.195	-0.858629	0.228686	-3.75462	0.000173606	0.00395159	13.0646	14.2583	7.99467	5.95392
ENSMUSG00000024777.9	Ppp2r5b	667.654	-0.770169	0.205101	-3.75508	0.00017329	0.00395159	23.5607	20.9836	12.9318	11.1024
ENSMUSG00000025213.11	Kazald1	81.958	-3.38206	0.900728	-3.7548	0.000173477	0.00395159	6.23038	5.63493	1.00234	0.05966
ENSMUSG00000033737.14	Fndc3c1	7994.77	0.94827	0.252614	3.75384	0.000174147	0.00395883	98.9206	64.4997	123.178	164.338
ENSMUSG00000024054.13	Smchd1	5583.39	0.605274	0.161295	3.75259	0.000175017	0.00397353	47.4596	41.524	59.1347	65.074
ENSMUSG00000025026.14	Add3	3666.36	0.684662	0.182671	3.74807	0.000178204	0.00404072	39.8503	40.5532	54.2618	64.5503
ENSMUSG00000021680.7	Crhbp	24.67	3.53483	0.943333	3.74717	0.00017884	0.00404999	0.20281	0.114273	1.67844	1.50742
ENSMUSG00000022240.9	Ctnnd2	725.382	-1.04501	0.278935	-3.74642	0.000179378	0.004057	13.3226	8.12538	4.59558	4.875
ENSMUSG00000032348.5	Gsta4	2901.25	0.708026	0.189043	3.74531	0.000180171	0.00406976	151.493	145.249	200.565	244.458
ENSMUSG00000030930.13	Chst15	524.041	-0.879754	0.235375	-3.73767	0.000185731	0.00419003	8.96498	8.64141	4.99004	3.84176
ENSMUSG00000041187.16	Prkd2	580.736	-0.801097	0.21439	-3.73664	0.000186498	0.004202	18.163	16.8977	10.0882	8.45383
ENSMUSG00000022033.9	Pbk	2025.5	0.763873	0.204448	3.73627	0.000186772	0.00420285	54.2076	58.0696	78.6666	96.7513
ENSMUSG00000026479.13	Lamc2	829.538	-1.24826	0.334281	-3.73416	0.000188345	0.00423288	23.9368	11.6703	6.59539	7.01317
ENSMUSG00000038077.7	Kcna6	316.807	-0.996825	0.267364	-3.72834	0.000192748	0.00432637	6.26971	7.17701	3.2489	2.98953
ENSMUSG00000033257.14	Ttll4	3507.99	0.620566	0.166475	3.72768	0.000193253	0.00433224	28.7422	24.6054	36.0341	39.1734
ENSMUSG00000033597.8	Caskin1	135.212	-1.40644	0.377511	-3.72557	0.000194875	0.00435759	2.27691	1.84124	0.811277	0.613773
ENSMUSG00000069227.4	Gprin1	280.061	-0.983686	0.264026	-3.72571	0.000194763	0.00435759	5.82243	5.51297	2.79255	2.48677
ENSMUSG00000046417.14	Lrrc75a	638.014	-0.798275	0.214324	-3.72461	0.000195614	0.00436862	29.0815	23.7305	13.7288	14.0829
ENSMUSG00000024601.8	Isoc1	3952.22	0.618204	0.166022	3.72362	0.000196385	0.00438035	78.5297	78.1799	104.224	116.97
ENSMUSG00000031734.12	Irx3	748.026	-0.730436	0.196273	-3.72153	0.000198022	0.00441133	22.7969	23.4697	13.4988	12.2188
ENSMUSG00000046351.10	Zfp322a	2286.62	1.06108	0.285152	3.72109	0.000198364	0.00441341	24.9015	40.2612	56.9911	69.2481
ENSMUSG00000059857.15	Ntng1	258.196	1.01587	0.273088	3.71993	0.000199277	0.00442819	2.17163	2.03265	3.93227	3.87976
ENSMUSG00000040860.16	Crocc	1206.7	-0.92571	0.248889	-3.71937	0.000199724	0.00443188	27.7598	18.2169	12.2357	9.9111
ENSMUSG00000041057.9	Wdr43	5581.92	0.597134	0.160559	3.71909	0.000199942	0.00443188	79.0016	86.6453	114.506	116.516
ENSMUSG00000033904.15	Ccp110	3068.47	0.630696	0.169814	3.71404	0.000203978	0.00451571	26.8817	25.1253	34.6637	39.2806
ENSMUSG00000026872.16	Zeb2	2400.21	0.600282	0.161642	3.71365	0.000204288	0.00451696	27.2717	23.7094	34.9184	36.0242
ENSMUSG00000024112.16	Cacna1h	798.796	-1.17871	0.317484	-3.71267	0.000205087	0.00452899	19.5028	10.1069	5.95359	5.93677
ENSMUSG00000025212.16	Sfxn3	445.692	-0.94423	0.254663	-3.70776	0.000209097	0.0046061	14.2718	11.3236	6.82065	5.37394
ENSMUSG00000057465.4	Saa2	51.0473	3.54403	0.955779	3.708	0.000208903	0.0046061	0	1.4992	8.1148	10.2252
ENSMUSG00000096740.7	Lbhd1	772.735	-1.55127	0.419249	-3.70013	0.000215493	0.00474111	56.351	81.7933	12.7268	30.0485
ENSMUSG00000033006.9	Sox10	997.878	-0.952713	0.257559	-3.69901	0.000216444	0.00475616	33.9934	28.6493	18.1949	11.6579
ENSMUSG00000024076.9	Vit	93.689	1.6222	0.438747	3.69735	0.000217864	0.00477878	0.993328	1.15349	2.96271	3.20315
ENSMUSG00000073010.9	Gm5127	323.697	4.10322	1.10983	3.69718	0.000218012	0.00477878	0.378039	2.1569	17.0191	24.2963
ENSMUSG00000020627.9	Klhl29	519.673	-0.833153	0.225451	-3.6955	0.000219456	0.00480452	6.76659	5.45769	3.21042	3.0788
ENSMUSG00000044220.13	Nkx2-3	125.597	-1.63402	0.442209	-3.69514	0.000219768	0.00480542	7.49858	4.19719	1.76624	1.66144
ENSMUSG00000006567.11	Atp7b	391.676	1.1132	0.30129	3.6948	0.000220059	0.00480589	2.54399	2.36606	5.98716	3.82772
ENSMUSG00000010021.13	Kif19a	57.674	-2.05079	0.555163	-3.69403	0.000220724	0.00481449	3.81424	3.26491	0.849514	0.691923
ENSMUSG00000027985.14	Lef1	777.276	-0.874845	0.236917	-3.69262	0.000221957	0.00483546	23.6777	16.7978	10.7876	9.425
ENSMUSG00000043496.7	Tril	2168.53	-0.687262	0.186142	-3.69214	0.000222374	0.00483861	36.0404	28.4547	19.8377	16.9336
ENSMUSG00000080776.1	Gm12174	3496.88	0.66797	0.181007	3.6903	0.000223986	0.00486772	202.692	224.562	294.925	330.563
ENSMUSG00000058975.6	Kcnc1	43.1565	-2.67358	0.724627	-3.6896	0.000224607	0.00487527	0.754445	0.544268	0.135604	0.051975
ENSMUSG00000043929.16	Klhl15	444.944	0.866848	0.235029	3.68827	0.000225788	0.00489491	5.19926	4.38352	7.751	8.26091
ENSMUSG00000014725.14	Adam28	30.6998	3.70587	1.0051	3.68708	0.000226841	0.00490244	0.109947	0.081736	0.547695	1.65001
ENSMUSG00000025949.15	Pikfyve	1603.94	0.704342	0.19101	3.68746	0.000226503	0.00490244	10.8825	8.81322	13.9686	15.3902
ENSMUSG00000039137.18	Whrn	672.492	0.796535	0.216042	3.68694	0.000226962	0.00490244	11.2685	12.8878	19.5692	19.2583
ENSMUSG00000018865.8	Sult4a1	119.217	-1.39657	0.378887	-3.68598	0.000227826	0.00491513	4.75048	4.61794	1.55877	1.69258
ENSMUSG00000027962.14	Vcam1	2424.85	-0.842639	0.228717	-3.6842	0.000229422	0.00493949	62.9237	56.1915	25.3779	35.4209
ENSMUSG00000031827.12	Cotl1	3186.31	-0.697671	0.189373	-3.6841	0.000229511	0.00493949	161.489	164.065	105.754	79.6533
ENSMUSG00000006800.13	Sulf2	8026.13	-0.662097	0.179929	-3.67977	0.000233448	0.00501431	186.726	151.755	109.656	87.1287
ENSMUSG00000097545.7	Mir124a-1hg	70.7517	-1.98104	0.538376	-3.67965	0.000233552	0.00501431	1.57841	1.94779	0.52344	0.308154
ENSMUSG00000029755.10	Dlx5	224.02	-2.06915	0.562461	-3.67874	0.000234391	0.00502626	19.9525	13.0372	5.70645	1.56258
ENSMUSG00000038034.15	Igsf8	653.608	-0.860812	0.23402	-3.67838	0.000234723	0.00502731	29.6017	24.0841	15.3332	11.8301
ENSMUSG00000017057.9	Il13ra1	660.276	1.07978	0.29358	3.67797	0.000235093	0.00502918	6.41434	8.21078	11.8496	16.7172
ENSMUSG00000029304.14	Spp1	130.557	-1.61662	0.439696	-3.67667	0.000236296	0.00504884	9.30956	7.86824	3.3442	1.82167
ENSMUSG00000066477.13	Gm16551	39.7765	-3.09712	0.842467	-3.67625	0.000236687	0.00505112	1.07419	3.15911	0.315766	0.158001
ENSMUSG00000019979.12	Apaf1	1760.34	-0.7252	0.197285	-3.6759	0.000237016	0.00505208	27.7197	22.8839	15.7864	12.3602
ENSMUSG00000091400.1	Gm6356	146.676	1.40634	0.382999	3.67192	0.000240737	0.00512524	2.67101	3.16909	6.42288	7.97259
ENSMUSG00000034457.10	Eda2r	147.683	1.61199	0.439277	3.66965	0.000242881	0.00516472	0.923118	1.20963	2.32714	3.68043
ENSMUSG00000026657.16	Frmd4a	2306.21	-0.636679	0.173534	-3.6689	0.000243598	0.00517376	50.6387	44.8529	31.0562	25.4944
ENSMUSG00000049511.5	Htr1b	62.2715	-2.18258	0.595088	-3.66766	0.000244785	0.00519277	1.54705	1.96829	0.249625	0.455823
ENSMUSG00000018474.17	Chd3	6533.94	0.623817	0.170123	3.66686	0.00024555	0.0052028	94.1836	93.1534	149.018	117.387
ENSMUSG00000097346.1	Gm26619	5119.2	0.821876	0.224169	3.66633	0.00024606	0.00520739	183.91	257.984	366.876	356.289
ENSMUSG00000038390.11	Gpr162	380.448	-0.993562	0.271049	-3.66561	0.000246746	0.00521569	10.6162	8.4653	4.99927	3.78591
ENSMUSG00000040276.14	Pacsin1	96.8575	-1.75965	0.480325	-3.66345	0.000248842	0.00525376	4.34299	4.17534	1.51671	0.802913
ENSMUSG00000023473.11	Celsr3	234.34	-1.7293	0.472125	-3.66281	0.000249465	0.00526066	2.04279	4.74657	1.039	0.870758
ENSMUSG00000018362.14	Kpna2	9062.5	0.592373	0.161808	3.66095	0.00025128	0.00529267	223.288	246.232	318.866	333.537
ENSMUSG00000024500.18	Ppp2r2b	431.138	-0.847386	0.231508	-3.66028	0.000251941	0.00530029	15.9887	16.1236	7.98713	8.4472
ENSMUSG00000045930.2	Clec14a	602.601	-0.807987	0.220927	-3.65725	0.000254937	0.00535698	11.5534	10.261	5.33378	6.08725
ENSMUSG00000022269.13	2020-03-11	35.4925	-2.56802	0.702259	-3.6568	0.00025538	0.00535998	2.68693	2.86509	0.53756	0.324012
ENSMUSG00000022103.9	Gfra2	210.584	-1.32754	0.363376	-3.65334	0.000258849	0.00542637	5.77766	5.45918	2.60174	1.53493
ENSMUSG00000042581.14	Thsd7b	419.224	-3.41158	0.933916	-3.65299	0.000259204	0.00542741	7.4729	9.87933	1.24001	0.285699
ENSMUSG00000082896.1	Gm5844	5847.26	0.66385	0.18196	3.64832	0.000263956	0.00552041	135.352	130.826	174.61	212.594
ENSMUSG00000002308.15	Cd320	1271.96	-0.610444	0.167356	-3.64758	0.000264726	0.00553	62.7661	58.4097	37.2318	35.7278
ENSMUSG00000004952.13	Rasa4	94.8537	-1.7742	0.486471	-3.64708	0.000265242	0.00553428	3.50842	5.50275	1.11665	1.32373
ENSMUSG00000047879.16	Usp14	4973.21	0.548197	0.150415	3.64457	0.000267837	0.00558187	143.315	126.407	177.892	184.23
ENSMUSG00000024542.8	Cep192	3803.98	0.802398	0.220243	3.64324	0.000269232	0.00560438	25.2324	19.1042	30.9815	39.6704
ENSMUSG00000027598.16	Itch	3743.52	0.70969	0.194843	3.64237	0.000270144	0.00561679	38.5537	42.315	55.1146	66.5949
ENSMUSG00000034329.16	Brip1	725.076	0.766185	0.210539	3.63916	0.00027353	0.00567887	5.61629	5.07173	7.83604	8.84864
ENSMUSG00000037071.2	Scd1	1320.32	0.673364	0.185044	3.63893	0.000273769	0.00567887	12.9981	14.0604	19.4199	20.3796
ENSMUSG00000045114.10	Prrt2	16.8947	-6.31797	1.73649	-3.63836	0.000274378	0.00568488	0.626861	1.0056	0.00157	0.015827
ENSMUSG00000033411.16	Ctdspl2	3702.15	0.682724	0.187812	3.63515	0.00027782	0.00574949	43.2711	36.8759	53.6017	64.2793
ENSMUSG00000031285.14	Dcx	896.498	-1.02561	0.282223	-3.63403	0.000279033	0.00576117	10.9879	15.8625	7.04982	5.22463
ENSMUSG00000095440.1	Fignl2	2211.63	-0.673178	0.185236	-3.63416	0.000278885	0.00576117	44.2055	39.2059	27.0577	21.132
ENSMUSG00000027715.9	Ccna2	8838.9	0.550281	0.151451	3.63339	0.000279721	0.00576868	157.731	163.209	210.511	222.138
ENSMUSG00000021139.17	Gm20498	239.84	1.93458	0.532733	3.63143	0.000281857	0.00580599	7.19922	5.31209	10.9661	31.9339
ENSMUSG00000032334.9	Loxl1	495.837	-0.790948	0.217892	-3.62999	0.000283431	0.00583166	11.9948	12.2494	6.70325	6.21129
ENSMUSG00000035085.5	1700020L24Rik	31.9659	-2.75145	0.758407	-3.62794	0.000285693	0.00586462	6.62369	6.02298	1.09527	0.666476
ENSMUSG00000040329.14	Il7	45.8122	-2.18295	0.601663	-3.62819	0.000285412	0.00586462	1.09584	0.895876	0.20516	0.194989
ENSMUSG00000002718.14	Cse1l	13025.4	0.768142	0.211857	3.62576	0.000288118	0.00589398	258.758	289.565	369.991	488.432
ENSMUSG00000008136.14	Fhl2	420.096	0.894931	0.246792	3.62625	0.000287566	0.00589398	11.5715	12.5402	19.6866	21.7769
ENSMUSG00000014767.16	Tbp	1832.52	1.10463	0.304646	3.62594	0.000287913	0.00589398	14.4502	24.2381	45.0145	32.42
ENSMUSG00000040680.8	Kremen2	18.4605	-6.37667	1.75941	-3.62432	0.00028972	0.00591995	1.55317	0.68796	0	0.028635
ENSMUSG00000021367.7	Edn1	860.846	-0.864111	0.238486	-3.62332	0.000290841	0.00592921	29.2987	31.6635	18.1616	12.8664
ENSMUSG00000038349.10	Plcl1	248.832	1.31139	0.361924	3.62338	0.000290777	0.00592921	1.36518	1.58611	2.69399	4.08609
ENSMUSG00000027797.15	Dclk1	888.499	-0.704867	0.194579	-3.62253	0.000291735	0.00594063	15.2604	14.7769	8.05496	8.87767
ENSMUSG00000030077.11	Chl1	210.341	1.20638	0.333252	3.62002	0.000294581	0.00599172	1.0396	1.30014	2.33273	2.6725
ENSMUSG00000040479.11	Dgkz	2862.41	-0.651532	0.180008	-3.61945	0.000295225	0.00599796	78.2838	83.5924	52.6858	42.5138
ENSMUSG00000013611.14	Snx31	19.9678	-4.4605	1.23492	-3.61198	0.000303872	0.00615963	1.43039	1.02603	0.097696	0
ENSMUSG00000024030.6	Abcg1	301.911	-1.06295	0.294299	-3.61181	0.000304066	0.00615963	8.7146	6.08018	3.22624	3.24021
ENSMUSG00000026202.13	Tuba4a	403.356	-1.01686	0.281548	-3.61168	0.000304222	0.00615963	12.9696	16.8466	6.47553	7.13562
ENSMUSG00000005846.11	Rsl1d1	8765.86	0.566597	0.156929	3.61054	0.000305564	0.00617977	238.014	242.971	312.687	342.682
ENSMUSG00000025532.13	Crcp	624.484	0.740251	0.205106	3.60911	0.000307253	0.00620686	29.0953	27.6352	43.1085	44.0126
ENSMUSG00000037005.16	Xpnpep2	111.891	-1.92675	0.534063	-3.60772	0.000308898	0.006233	3.51726	3.06275	1.16591	0.443827
ENSMUSG00000042529.14	Kcnj12	54.1772	-2.22588	0.617246	-3.60615	0.000310775	0.00626377	2.16944	2.48157	0.616583	0.305052
ENSMUSG00000037386.15	Rims2	104.374	-1.51016	0.418877	-3.60526	0.000311846	0.00627824	1.97336	2.17159	0.599469	0.732999
ENSMUSG00000040721.9	Zfhx2	992.027	-0.656202	0.182104	-3.60345	0.000314026	0.00631498	8.45666	7.85299	5.07377	4.45798
ENSMUSG00000052921.13	Arhgef15	521.676	-0.886101	0.245981	-3.60232	0.000315392	0.00633528	11.0617	10.5627	6.23341	4.56957
ENSMUSG00000023192.12	Grm2	18.483	-4.90997	1.36319	-3.60183	0.00031599	0.00634012	0.360977	0.731999	0.033546	0
ENSMUSG00000004040.16	Stat3	743.355	-1.19816	0.332725	-3.60104	0.000316945	0.00634497	31.9963	15.8843	10.1086	8.85041
ENSMUSG00000052387.15	Trpm3	89.0144	-1.67439	0.464963	-3.60112	0.000316844	0.00634497	2.05597	1.66683	0.447311	0.620453
ENSMUSG00000022864.13	D16Ertd472e	388.106	1.00211	0.278314	3.60065	0.00031742	0.00634732	7.01747	6.79684	11.0218	14.3902
ENSMUSG00000024797.12	Vps51	1123.07	-0.703207	0.19536	-3.59955	0.000318769	0.00636714	67.3913	57.8293	38.9376	31.7657
ENSMUSG00000041431.16	Ccnb1	6836.77	0.503427	0.139909	3.59825	0.000320366	0.00639185	169.783	169.54	229.187	214.017
ENSMUSG00000011254.16	Thg1l	1125.81	0.653069	0.181518	3.59782	0.000320897	0.00639527	29.3311	28.0488	44.7258	38.4133
ENSMUSG00000016349.10	Eef1a2	16.6827	-5.2314	1.45484	-3.59585	0.00032333	0.00643336	0.817469	1.18889	0	0.048135
ENSMUSG00000022636.13	Alcam	1417.42	-0.91748	0.255161	-3.59569	0.000323532	0.00643336	44.7876	42.8667	17.1361	25.381
ENSMUSG00000040624.17	Plekhg1	889.781	-0.833586	0.231863	-3.59516	0.000324187	0.00643918	14.5308	11.6468	6.00662	7.43756
ENSMUSG00000041881.12	Ndufa7	1736.8	0.675396	0.187882	3.59479	0.000324648	0.00644115	136.469	158.729	219.045	217.083
ENSMUSG00000010122.14	Slc47a1	23.8561	5.596	1.5572	3.59363	0.000326099	0.00646272	0	0.032035	1.59803	0.286924
ENSMUSG00000015961.8	Adss	6028.42	0.572217	0.159306	3.59194	0.00032823	0.00649772	114.818	114.516	148.784	164.795
ENSMUSG00000028158.14	Mttp	662.706	1.3086	0.364366	3.59143	0.000328867	0.00650308	7.6558	6.51419	22.2752	10.2156
ENSMUSG00000053046.14	Brsk2	98.3884	-1.52187	0.424063	-3.58878	0.000332235	0.00655509	2.88847	3.07195	1.09047	0.847029
ENSMUSG00000059412.6	Fxyd2	47.7754	4.40607	1.22772	3.58884	0.000332155	0.00655509	0	0.75399	15.5388	1.99204
ENSMUSG00000029802.13	Abcg2	2978.38	1.11118	0.309726	3.58762	0.000333714	0.00657698	28.7759	29.8731	40.3015	75.7189
ENSMUSG00000001794.12	Capns1	3302.76	-0.892763	0.248933	-3.58636	0.000335325	0.0066014	240.351	143.143	97.532	91.2777
ENSMUSG00000049929.7	Lpar4	1988.96	0.912059	0.254359	3.58571	0.000336161	0.00661054	24.4962	17.6807	30.3451	42.0485
ENSMUSG00000004044.9	Ptrf	1262.02	-0.718205	0.200473	-3.58255	0.000340256	0.00668368	26.631	31.5704	16.8939	15.8193
ENSMUSG00000027253.15	Lrp4	1599.96	-0.746784	0.208544	-3.58094	0.000342356	0.00671751	20.9439	15.7616	11.042	9.02444
ENSMUSG00000027660.16	Skil	4586.69	0.718056	0.200667	3.57835	0.000345772	0.00677002	36.9617	34.1917	46.7763	60.5405
ENSMUSG00000075592.9	Nynrin	6904.77	-0.585712	0.163683	-3.57833	0.000345794	0.00677002	78.1847	66.1961	48.2223	40.2787
ENSMUSG00000000308.14	Ckmt1	108.109	-1.47434	0.412127	-3.57739	0.000347037	0.00678219	9.16291	7.60984	3.13683	2.39998
ENSMUSG00000061535.11	C1qtnf7	44.5947	-2.69736	0.754067	-3.57709	0.000347446	0.00678219	2.32145	0.893919	0.175819	0.258954
ENSMUSG00000097375.2	6720427I07Rik	417.57	1.15402	0.322624	3.577	0.00034756	0.00678219	7.42674	7.0807	11.4492	18.1109
ENSMUSG00000020799.16	Tekt1	173.893	1.26269	0.353054	3.57648	0.000348246	0.00678813	4.99691	4.40165	9.07425	11.5777
ENSMUSG00000001786.14	Fbxo7	608.104	-0.90719	0.253801	-3.57442	0.000351008	0.00683206	17.4206	17.064	10.0579	6.9603
ENSMUSG00000020649.11	Rrm2	8246.45	0.527522	0.147591	3.57422	0.000351269	0.00683206	210.774	200.834	263.518	281.881
ENSMUSG00000035722.15	Abca7	405.63	-0.85102	0.238162	-3.57328	0.000352544	0.00684937	4.92992	5.13554	2.75823	2.39678
ENSMUSG00000024423.5	Impact	3519.8	0.583404	0.163436	3.56961	0.000357512	0.00693831	54.3519	51.4802	69.0112	76.6971
ENSMUSG00000026426.10	Arl8a	792.443	-0.68406	0.191674	-3.56886	0.000358531	0.00695051	42.2561	36.9981	23.5666	21.7632
ENSMUSG00000057706.6	Mex3b	3463.71	-0.537781	0.150766	-3.56699	0.0003611	0.00699268	81.9228	73.6021	51.9998	46.5634
ENSMUSG00000027201.16	Myef2	7820.19	0.567453	0.159114	3.56634	0.000362006	0.00700259	160.876	140.607	195.193	214.776
ENSMUSG00000021932.13	Rnaseh2b	1245.65	0.624463	0.175129	3.56572	0.000362853	0.00701134	41.9117	39.7561	56.438	59.293
ENSMUSG00000026837.15	Col5a1	6155.77	-0.518587	0.145489	-3.56444	0.000364628	0.007038	59.7214	51.7908	36.8536	34.6828
ENSMUSG00000043670.4	Diras1	37.5074	-2.48892	0.698543	-3.56302	0.000366617	0.00706872	1.57736	1.20352	0.285182	0.170306
ENSMUSG00000027793.6	Ccna1	42.9734	-2.21408	0.622153	-3.55874	0.000372638	0.00717702	4.39766	3.82887	0.920564	0.702571
ENSMUSG00000027823.9	Gmps	9842.72	0.687509	0.193428	3.55433	0.00037894	0.00729049	65.8878	54.3058	79.1682	98.0843
ENSMUSG00000053199.13	Arhgap20	168.413	1.20533	0.339323	3.55215	0.000382093	0.00734321	1.04865	0.916258	1.92781	2.21721
ENSMUSG00000004791.6	Pgf	486.253	1.20033	0.337953	3.55176	0.000382665	0.00734627	8.88548	14.8681	22.8899	27.9238
ENSMUSG00000098387.2	Pet117	121.769	-1.75176	0.49342	-3.55025	0.00038487	0.00738061	11.6641	22.837	4.76412	4.77374
ENSMUSG00000020894.16	Vamp2	896.317	-0.862388	0.242988	-3.5491	0.000386553	0.00740491	54.1541	36.2996	23.1457	22.3494
ENSMUSG00000026109.14	Tmeff2	120.42	-1.61163	0.454145	-3.54871	0.000387128	0.00740794	3.78998	3.25909	1.39561	0.73632
ENSMUSG00000021567.14	Nkd2	336.495	-1.07448	0.303019	-3.54592	0.000391245	0.00747854	8.95862	5.89816	3.47971	2.96957
ENSMUSG00000025592.17	Dach2	328.005	1.03855	0.292909	3.54564	0.000391659	0.00747854	3.68273	3.27381	5.66171	7.41078
ENSMUSG00000074863.4	Platr25	61.0474	2.13607	0.602536	3.54514	0.000392406	0.00748476	1.12397	0.517611	2.88042	3.34528
ENSMUSG00000030655.14	Smg1	4933.47	0.655836	0.185044	3.54422	0.000393772	0.00750277	22.6622	17.5452	27.5195	30.4882
ENSMUSG00000015957.11	Wnt11	175.309	1.42667	0.402593	3.54371	0.000394538	0.00750931	3.18547	5.32517	11.8727	9.73152
ENSMUSG00000049556.4	Lingo1	88.6569	-1.5998	0.45149	-3.54338	0.000395037	0.00751077	2.54065	3.21816	0.919631	0.83617
ENSMUSG00000028822.11	Tmem50a	1467.2	-0.574973	0.162328	-3.54205	0.000397032	0.00753258	97.7564	92.1445	60.1952	57.1073
ENSMUSG00000071604.4	Fam189a2	131.419	-1.29273	0.364955	-3.54215	0.00039688	0.00753258	5.06247	4.40144	1.91701	1.61626
ENSMUSG00000001555.10	Fkbp10	1851.01	-0.569194	0.160757	-3.54072	0.000399044	0.00756269	66.5066	58.4875	39.5614	37.8428
ENSMUSG00000022672.8	Prkdc	1741.49	0.72484	0.204765	3.53986	0.000400332	0.00757903	7.9266	6.14623	9.88929	11.3728
ENSMUSG00000042129.8	Rassf4	950.92	0.835292	0.236085	3.5381	0.000403012	0.00762165	6.19346	8.22265	12.0698	11.8081
ENSMUSG00000030760.14	Acer3	612.111	0.76191	0.215386	3.53741	0.000404065	0.00763344	2.83418	2.61243	4.01797	4.4553
ENSMUSG00000030929.16	Eri2	1562.02	0.690367	0.195346	3.53408	0.0004092	0.00772224	16.348	17.1034	22.8936	26.7864
ENSMUSG00000034255.17	Arhgap27	415.869	-0.855316	0.242188	-3.53161	0.000413033	0.00778631	12.5898	10.0979	5.96729	5.51243
ENSMUSG00000054667.7	Irs4	734.292	-1.52217	0.431254	-3.52965	0.000416115	0.00783609	16.1961	6.38406	4.55749	2.61501
ENSMUSG00000031231.4	Cox7b	3274.19	0.610848	0.173076	3.52936	0.000416571	0.00783639	214.943	239.711	312.035	328.16
ENSMUSG00000014329.14	Bicc1	1115.14	0.944035	0.267678	3.52676	0.000420684	0.00787294	7.78688	11.7966	17.2764	17.7336
ENSMUSG00000029326.13	Enoph1	1092.88	0.628181	0.178119	3.52675	0.000420697	0.00787294	36.3754	34.0938	49.0964	50.9997
ENSMUSG00000029547.10	Ints1	3099.1	-0.515464	0.146159	-3.52673	0.000420729	0.00787294	58.8453	54.7393	36.8975	36.1789
ENSMUSG00000034640.9	Tiparp	2320.53	0.661011	0.187402	3.52723	0.000419928	0.00787294	27.8141	28.8437	37.9087	44.503
ENSMUSG00000041390.18	Mdfic	1219.77	1.24471	0.352856	3.52754	0.000419448	0.00787294	13.3802	19.457	25.2591	46.4383
ENSMUSG00000040565.7	Btaf1	3659.23	0.644373	0.182735	3.52626	0.000421466	0.00787844	25.8733	25.2089	33.3044	40.0136
ENSMUSG00000048965.8	Mrgpre	103.731	-1.52479	0.432533	-3.52526	0.000423071	0.00790013	2.75199	2.52973	1.01927	0.669843
ENSMUSG00000003153.10	Slc2a3	3570.73	-0.733684	0.208159	-3.52463	0.000424077	0.00791062	70.7739	63.2794	43.8072	30.532
ENSMUSG00000027977.15	Ndst3	157.136	-1.32514	0.376115	-3.52322	0.000426332	0.00793603	3.07925	2.35849	1.178	0.814513
ENSMUSG00000036002.12	Fam214b	382.696	-0.863807	0.245166	-3.52336	0.000426111	0.00793603	15.4675	12.5816	7.28165	6.82828
ENSMUSG00000019066.13	Rab3d	245.276	-0.970898	0.275621	-3.52258	0.000427365	0.00794156	6.32417	6.00828	2.94631	2.84874
ENSMUSG00000022475.18	Hdac7	2318.76	-0.662693	0.188132	-3.52248	0.000427523	0.00794156	80.8001	71.0575	49.8888	38.4776
ENSMUSG00000004207.14	Psap	6003.81	-0.550175	0.156223	-3.52172	0.000428754	0.00795612	174.177	172.601	118.902	99.5207
ENSMUSG00000034220.7	Gpc1	4452.46	-0.676024	0.191996	-3.52104	0.000429866	0.00796843	101.036	75.0377	54.713	46.4418
ENSMUSG00000046280.9	She	700.484	-0.887268	0.252047	-3.52025	0.000431145	0.00798382	9.07088	11.6683	5.75123	4.656
ENSMUSG00000029822.15	Osbpl3	488.143	-0.764147	0.217119	-3.51948	0.000432387	0.00799849	10.1986	10.0645	5.47661	5.5044
ENSMUSG00000095118.1	Snord14d	16.9277	4.87543	1.38548	3.51894	0.000433274	0.00800656	0.803234	0.436854	25.2245	20.0707
ENSMUSG00000021929.8	Kpna3	6169.4	0.668104	0.189953	3.5172	0.000436124	0.00805086	81.1469	66.6113	97.4576	117.572
ENSMUSG00000022061.8	Nkx3-1	200.511	-1.38159	0.392974	-3.51572	0.000438568	0.00808757	7.1843	4.5992	2.547	1.59324
ENSMUSG00000035407.8	Kank4	846.386	-0.720435	0.205114	-3.51237	0.00044413	0.00817512	15.5173	12.8666	8.58561	7.23118
ENSMUSG00000062373.7	Tmem65	1847.41	-0.582931	0.165968	-3.51231	0.000444235	0.00817512	40.1123	36.1756	25.0855	21.7945
ENSMUSG00000024942.16	Capn1	391.859	-0.84146	0.239754	-3.50968	0.000448645	0.00824774	10.4008	10.489	5.1903	5.54842
ENSMUSG00000045008.1	9030612E09Rik	42.1209	-2.22545	0.634341	-3.5083	0.000450987	0.00828222	2.78929	2.05999	0.502503	0.431327
ENSMUSG00000020116.7	Pno1	2727.54	0.584357	0.166638	3.50673	0.000453641	0.00832237	88.0238	95.1746	124.854	128.452
ENSMUSG00000032555.9	Topbp1	7445.7	0.595941	0.170006	3.50541	0.000455904	0.00834666	94.923	92.5911	120.011	140.353
ENSMUSG00000037892.13	Pcdh18	6266.06	0.633765	0.180793	3.50546	0.000455812	0.00834666	60.5889	63.6168	81.0015	96.2167
ENSMUSG00000020075.7	Ddx21	7341.46	0.605124	0.172643	3.50506	0.0004565	0.00834833	73.7998	84.0982	107.227	114.201
ENSMUSG00000036644.15	Tbc1d9b	1939.8	-0.58399	0.166625	-3.50481	0.000456934	0.00834833	41.4108	34.8734	24.021	22.6992
ENSMUSG00000042873.11	Lhfpl4	84.6353	-1.59641	0.455569	-3.5042	0.000457976	0.00835876	1.59946	1.90059	0.58208	0.488599
ENSMUSG00000071177.4	Serpina1d	37.2692	3.42233	0.976928	3.50316	0.000459779	0.00838308	0.110108	0.452266	4.34482	1.55482
ENSMUSG00000035891.16	Cerk	697.092	-0.789821	0.225503	-3.50248	0.000460942	0.00839567	14.7147	11.0095	7.0935	6.52647
ENSMUSG00000040891.6	Foxa3	24.4346	4.34643	1.24157	3.50076	0.000463925	0.00844134	0	0.116021	2.06022	0.690433
ENSMUSG00000061517.8	Sox21	357.821	-0.973148	0.278019	-3.50029	0.000464747	0.00844767	8.57787	7.53632	3.29018	4.23016
ENSMUSG00000036834.16	Plch1	676.028	-0.886323	0.253494	-3.49643	0.000471533	0.00856226	12.2874	11.0246	4.91552	6.64991
ENSMUSG00000022752.8	Tomm70a	7614.7	0.514691	0.147255	3.49524	0.000473636	0.00858715	107.113	106.704	136.932	144.121
ENSMUSG00000029309.7	Sparcl1	3297.65	0.585915	0.167639	3.49511	0.00047387	0.00858715	60.3117	62.9329	92.9357	77.8713
ENSMUSG00000020572.7	Nampt	3010.14	0.62533	0.179016	3.49315	0.000477367	0.0086417	32.389	34.6076	44.6261	50.5234
ENSMUSG00000070691.10	Runx3	37.3267	-3.02032	0.865287	-3.49054	0.000482047	0.00871755	0.730514	1.57296	0.202718	0.064828
ENSMUSG00000045534.4	Kcna5	187.89	-1.11268	0.3188	-3.49021	0.000482639	0.00871938	6.16198	5.41235	2.72383	2.19899
ENSMUSG00000019960.7	Dusp6	3387.13	-0.598722	0.171567	-3.48972	0.000483533	0.00872667	91.094	96.6877	62.617	51.9026
ENSMUSG00000050272.9	Dscam	26.7805	-2.84284	0.814822	-3.48891	0.000484994	0.00874415	0.465159	0.339093	0.048534	0.053515
ENSMUSG00000020182.16	Ddc	652.321	0.950464	0.272569	3.48706	0.000488361	0.00879594	13.1207	18.5709	27.1114	29.7064
ENSMUSG00000004018.9	Fancl	1712.19	0.697197	0.200085	3.4845	0.000493053	0.00887146	33.0178	32.8413	44.1507	53.9644
ENSMUSG00000037012.18	Hk1	1311.15	-0.607647	0.174485	-3.48252	0.000496723	0.00892847	26.2108	27.537	16.4489	16.0733
ENSMUSG00000027433.5	Xrn2	6972.27	0.676746	0.194425	3.48076	0.000499996	0.00897821	118.824	95.4275	141.486	172.063
ENSMUSG00000021990.15	Spata13	776.797	-0.759092	0.2181	-3.48047	0.000500526	0.00897867	14.8402	11.695	7.82786	6.54294
ENSMUSG00000001930.17	Vwf	1410.5	-0.731229	0.210185	-3.47898	0.000503323	0.00901973	15.4903	18.8224	10.334	8.80606
ENSMUSG00000035863.13	Palm	2670.84	-0.586849	0.168754	-3.47755	0.000506025	0.00905171	87.3008	76.4518	54.6596	45.653
ENSMUSG00000066000.12	2610305D13Rik	661.612	0.784598	0.225622	3.47749	0.000506126	0.00905171	13.7973	10.5458	18.7497	19.5526
ENSMUSG00000034112.8	Atp2c2	240.149	1.48404	0.426851	3.47673	0.000507568	0.00906837	2.17113	2.84753	4.52335	8.43281
ENSMUSG00000029670.12	Ing3	1415.44	0.882546	0.253945	3.47534	0.000510206	0.00910212	26.7223	23.7059	34.4906	50.6113
ENSMUSG00000086290.8	Snhg12	672.477	0.792619	0.228079	3.4752	0.00051048	0.00910212	40.1223	47.8144	75.4	66.0048
ENSMUSG00000026193.15	Fn1	25150.5	-0.761286	0.219082	-3.47489	0.000511058	0.00910329	488.205	387.909	284.451	191.838
ENSMUSG00000041058.15	Wwp1	2106.39	0.714398	0.205611	3.4745	0.000511798	0.00910734	18.618	15.2612	22.8587	28.0137
ENSMUSG00000032374.14	Plod2	4193.66	0.710944	0.204651	3.47393	0.00051289	0.00911764	58.4658	66.0126	83.5931	103.919
ENSMUSG00000028618.11	Tmem59	3170.75	-0.512428	0.147567	-3.47251	0.000515625	0.00915711	153.109	151.394	101.864	94.7697
ENSMUSG00000062393.13	Dgkk	288.583	-1.16971	0.336893	-3.47205	0.000516501	0.00916352	4.56266	2.6969	1.52683	1.41291
ENSMUSG00000026764.15	Kif5c	1720.05	-0.577759	0.166419	-3.47171	0.00051715	0.00916588	21.1894	20.9463	12.6765	13.3019
ENSMUSG00000052125.16	F730043M19Rik	89.7603	1.63661	0.471495	3.4711	0.00051834	0.00917782	0.753436	0.942376	2.8883	2.07751
ENSMUSG00000001076.6	C1ql4	17.33	-4.68309	1.34939	-3.47052	0.000519452	0.00918835	2.14395	2.82603	0.189479	0
ENSMUSG00000025666.16	Tmem47	2078.23	0.694794	0.200374	3.46749	0.000525334	0.00928317	27.8695	23.312	34.3069	41.534
ENSMUSG00000020546.14	Stxbp4	1957.17	0.574334	0.165724	3.46561	0.000529036	0.00933003	19.4969	18.2001	24.9283	26.6558
ENSMUSG00000081865.1	Gm15484	437.012	0.949942	0.274087	3.46585	0.000528564	0.00933003	23.3129	23.0652	48.9254	33.8921
ENSMUSG00000011832.15	Evi5l	617.773	-0.799005	0.230682	-3.46367	0.000532863	0.00938822	25.7056	21.4718	11.434	13.3947
ENSMUSG00000033102.14	Cdc14b	2009.86	0.623759	0.18011	3.46321	0.000533769	0.00939487	18.9484	20.3967	26.6869	29.1956
ENSMUSG00000026418.16	Tnni1	503.023	-1.45165	0.419293	-3.46215	0.000535875	0.00941345	32.3186	76.1816	18.0876	18.9354
ENSMUSG00000029486.13	Mrpl1	1197.37	0.721995	0.208544	3.46207	0.000536047	0.00941345	24.5702	18.0719	32.5659	31.68
ENSMUSG00000038379.15	Ttk	2641.48	0.684286	0.197663	3.46188	0.000536414	0.00941345	49.7879	45.9137	62.6499	78.3921
ENSMUSG00000026204.15	Ptprn	98.9298	-1.63829	0.47341	-3.46062	0.000538939	0.00944844	2.45404	3.77173	1.04733	0.816641
ENSMUSG00000049932.3	H2afx	4869.44	-0.520019	0.150283	-3.46025	0.000539666	0.00945187	281.409	253.451	183.267	160.01
ENSMUSG00000051747.14	Ttn	103.287	-1.47461	0.42622	-3.45975	0.000540674	0.00946019	0.084928	0.11045	0.033688	0.032376
ENSMUSG00000036902.9	Neto2	1583.75	0.747654	0.216177	3.45853	0.000543136	0.00949393	15.4247	11.8528	19.0409	22.8085
ENSMUSG00000017291.13	Taok1	4893.32	0.784637	0.226891	3.45821	0.000543771	0.00949569	22.6605	16.1982	26.9373	34.1955
ENSMUSG00000057278.8	Snrpg	3717.64	0.699652	0.202374	3.45722	0.000545781	0.00952143	254.369	301.367	469.571	366.2
ENSMUSG00000000531.4	Grasp	328.383	-0.924608	0.26778	-3.45287	0.000554656	0.00966644	14.3539	13.1725	7.55145	5.82443
ENSMUSG00000028468.15	Rgp1	1792.4	-0.76386	0.221241	-3.45262	0.00055518	0.00966644	38.1946	30.7854	16.1901	20.9567
ENSMUSG00000000093.6	Tbx2	2740.15	-0.948736	0.275093	-3.44878	0.00056312	0.00979509	76.8114	52.1191	37.9898	23.4682
ENSMUSG00000041817.13	Fam169a	1029.58	0.696667	0.202044	3.44809	0.000564558	0.0098105	11.2426	10.9932	15.2966	17.8247
ENSMUSG00000083282.2	Ctsf	503.205	-0.91829	0.266369	-3.44743	0.000565938	0.00982488	25.8006	17.4041	10.5665	10.3075
ENSMUSG00000021116.9	Eif2s1	7239.56	0.603846	0.17528	3.44504	0.000570976	0.00989303	101.318	115.622	145.952	157.982
ENSMUSG00000037622.14	Wdtc1	1456.64	-0.578097	0.167797	-3.44521	0.000570606	0.00989303	29.0138	27.0744	18.3468	16.2459
ENSMUSG00000021464.14	Ror2	1302.62	-0.931797	0.270558	-3.44399	0.000573202	0.00991226	30.9176	24.6806	16.7464	10.1274
ENSMUSG00000027716.13	Trpc3	156.834	-1.39002	0.403579	-3.44423	0.000572685	0.00991226	5.0092	4.68135	2.1866	1.24941
ENSMUSG00000036109.17	Mbnl3	398.549	1.01894	0.295962	3.44282	0.000575684	0.00994552	4.43542	3.56543	6.22393	8.52852
ENSMUSG00000028676.17	Srsf10	3516.93	0.654876	0.190233	3.4425	0.000576359	0.00994751	112.893	110.871	144.921	178.635
ENSMUSG00000022382.14	Wnt7b	395.507	1.43209	0.416086	3.4418	0.000577855	0.00996366	2.71435	5.26877	7.86705	12.2068
ENSMUSG00000026640.12	Plxna2	2891.33	-0.540608	0.157131	-3.44049	0.000580658	0.0100023	21.4414	20.9756	14.4202	12.4615
ENSMUSG00000058672.6	Tubb2a	3866.61	-0.545235	0.158499	-3.43998	0.000581749	0.0100114	179.27	193.472	118.534	117
ENSMUSG00000029169.11	Dhx15	13866.7	0.555513	0.161527	3.43914	0.000583573	0.0100331	254.23	250.707	318.498	363.535
ENSMUSG00000037474.13	Dtl	4094.16	0.702278	0.204471	3.43461	0.000593398	0.0101921	44.5082	52.1305	65.6464	79.2107
ENSMUSG00000079614.3	Seh1l	6541.46	0.605316	0.176275	3.43393	0.000594896	0.010208	89.8765	99.9328	125.479	140.474
ENSMUSG00000060477.14	Irak2	123.814	-1.36238	0.396934	-3.43227	0.000598559	0.0102609	8.92018	9.47419	3.90764	2.73986
ENSMUSG00000022098.9	Bmp1	3183.89	-0.637038	0.185787	-3.42885	0.000606137	0.0103808	74.9901	58.3843	42.8074	35.96
ENSMUSG00000002393.14	Nr2f6	1891.19	-0.676876	0.197465	-3.42783	0.000608419	0.0104099	83.6383	70.7341	50.3679	38.5441
ENSMUSG00000108218.1	Olfr1372-ps1	70.0295	1.79142	0.522963	3.42552	0.000613615	0.0104887	1.81977	1.1413	4.30922	4.85613
ENSMUSG00000055538.7	Zcchc24	1577.11	-0.626554	0.182981	-3.42415	0.000616727	0.0105318	27.4781	29.8756	18.4463	15.8639
ENSMUSG00000024799.14	Tm7sf2	446.246	-0.77064	0.225139	-3.42295	0.000619464	0.0105582	31.7708	31.6522	18.106	16.1876
ENSMUSG00000037149.9	Ddx1	9610.31	0.52077	0.152134	3.4231	0.000619117	0.0105582	203.7	201.992	256.353	278.912
ENSMUSG00000098948.1	Gm27640	30.3341	-5.0955	1.48882	-3.42251	0.000620462	0.0105651	1.49083	48.7648	0.6307	0.594379
ENSMUSG00000032215.15	Rsl24d1	3551.96	0.534013	0.156078	3.42145	0.000622884	0.0105962	121.854	120.937	156.652	166.803
ENSMUSG00000019792.7	Trmt11	691.908	0.791865	0.231531	3.42012	0.000625937	0.0106379	15.9801	11.867	21.3126	22.6876
ENSMUSG00000050244.8	Heatr1	5182.17	0.606435	0.177343	3.41957	0.000627211	0.0106494	38.3999	42.4414	53.3934	59.9628
ENSMUSG00000041763.14	Tpp2	5495.22	0.55151	0.161322	3.41869	0.000629229	0.0106735	73.3969	63.0276	87.9272	95.5001
ENSMUSG00000001119.7	Col6a1	551.19	-0.867064	0.253784	-3.41654	0.000634221	0.0107451	13.7716	10.7767	7.0632	5.29808
ENSMUSG00000022935.14	Grik1	55.696	-2.99808	0.877567	-3.41635	0.000634663	0.0107451	2.59608	1.95408	0.475598	0.054701
ENSMUSG00000022610.9	Mapk12	711.616	-0.671245	0.196539	-3.41533	0.000637055	0.0107754	30.0134	29.6205	16.9894	17.4684
ENSMUSG00000057378.14	Ryr3	287.046	2.07934	0.608912	3.41485	0.000638163	0.0107839	0.493798	2.2285	7.07838	4.06928
ENSMUSG00000002068.16	Ccne1	2294.1	0.522114	0.152966	3.41327	0.000641886	0.0108057	63.2529	61.4385	85.7134	79.2001
ENSMUSG00000004562.16	Arhgef40	2764.41	-0.827174	0.242301	-3.41382	0.000640578	0.0108057	89.3047	63.9362	47.0714	32.3456
ENSMUSG00000026245.16	Farsb	3602.78	0.492513	0.144286	3.41346	0.000641434	0.0108057	101.622	95.1114	128.137	126.418
ENSMUSG00000089762.3	Ier5l	1065.66	-0.618909	0.181318	-3.41339	0.000641601	0.0108057	31.8999	30.1232	19.9653	17.2457
ENSMUSG00000075394.4	Hoxc4	420.318	0.920004	0.269865	3.40913	0.000651714	0.0109608	8.01128	10.4189	16.2128	16.2353
ENSMUSG00000022321.15	Cdh10	242.433	1.42598	0.418511	3.40727	0.000656153	0.011022	2.09538	3.7785	6.09824	8.61804
ENSMUSG00000042590.16	Ipo11	5284.14	0.670312	0.19674	3.40709	0.000656597	0.011022	60.0441	69.381	86.3863	103.328
ENSMUSG00000004031.13	Brinp2	45.1532	-2.23501	0.656214	-3.40592	0.000659404	0.0110483	0.880432	1.18804	0.259311	0.148615
ENSMUSG00000020032.14	Nuak1	2943	-0.907798	0.266519	-3.40612	0.000658923	0.0110483	59.6983	33.7547	22.2509	23.1903
ENSMUSG00000096847.1	Tmem151b	723.181	-0.6718	0.197328	-3.40448	0.000662912	0.0110966	12.5212	11.1212	6.71227	6.90705
ENSMUSG00000034031.5	Ccdc182	15.9129	-4.11125	1.20803	-3.40326	0.000665862	0.0111355	1.70022	1.51645	0.131257	0.041938
ENSMUSG00000032449.13	Slc25a36	4063.66	0.734916	0.216069	3.40129	0.000670676	0.0112055	67.0486	50.3973	79.2986	99.3447
ENSMUSG00000029313.18	Aff1	1011.15	-0.81422	0.239481	-3.39993	0.00067402	0.0112508	12.8187	8.98593	6.31114	5.04671
ENSMUSG00000020811.16	Wscd1	107.368	-1.53076	0.450392	-3.39872	0.000677016	0.0112902	5.17411	3.12562	1.25423	1.33216
ENSMUSG00000086096.1	Gm12688	127.395	1.32555	0.390111	3.39789	0.000679071	0.0113138	6.00083	7.20634	17.0337	13.9077
ENSMUSG00000026113.17	Inpp4a	696.407	-0.908387	0.267398	-3.39714	0.000680947	0.0113239	15.889	15.838	9.52777	6.06833
ENSMUSG00000026814.16	Eng	1047.47	-0.803656	0.236557	-3.3973	0.000680547	0.0113239	25.503	33.9831	15.7945	15.7648
ENSMUSG00000022438.6	Parvb	1659.55	-0.712383	0.20979	-3.3957	0.000684545	0.011373	37.1437	35.9574	23.9754	17.2284
ENSMUSG00000002107.18	Celf2	2281.23	-0.642589	0.189349	-3.39368	0.000689597	0.0114463	29.6336	33.8888	20.4949	17.1317
ENSMUSG00000025105.8	Bnc1	363.865	-1.24909	0.368181	-3.3926	0.000692317	0.0114807	5.3197	8.75465	3.3074	2.22968
ENSMUSG00000022754.5	Tmem45a	301.138	1.00897	0.297504	3.39145	0.000695235	0.0115184	4.7717	6.03463	11.1341	9.10767
ENSMUSG00000032852.3	Rspo4	25.5826	-3.40956	1.00576	-3.39002	0.000698882	0.011568	1.96647	0.608625	0.133305	0.085185
ENSMUSG00000073436.11	Eme2	844.523	-0.653459	0.193034	-3.3852	0.000711259	0.0117619	18.6966	18.7864	10.6449	11.2909
ENSMUSG00000038456.9	Dennd2a	2208.87	-0.577697	0.170734	-3.38361	0.000715395	0.0118193	49.3543	42.3963	30.516	26.0057
ENSMUSG00000026443.3	Lrrn2	107.066	-1.34459	0.39767	-3.38116	0.000721816	0.0119143	3.04875	2.72584	1.13531	0.953699
ENSMUSG00000053166.14	Cdh22	33.21	-2.4275	0.718054	-3.38067	0.000723105	0.0119245	1.06156	0.896356	0.198645	0.134467
ENSMUSG00000008475.13	Arpc5	1696.22	-1.32245	0.391405	-3.37874	0.000728197	0.0119974	127.691	47.4762	35.7992	27.9832
ENSMUSG00000029101.14	Rgs12	1908.74	-0.530521	0.157083	-3.37734	0.000731917	0.0120363	48.3202	43.7647	29.7108	28.8927
ENSMUSG00000070576.4	Mn1	1443.79	-0.789433	0.233741	-3.37738	0.000731799	0.0120363	21.1588	14.0051	9.7877	8.82608
ENSMUSG00000030519.14	Apba2	380.776	-0.793989	0.235131	-3.3768	0.000733356	0.0120489	10.7309	10.6632	5.71197	5.66108
ENSMUSG00000059493.13	Nhs	848.315	0.773371	0.229162	3.37478	0.000738757	0.0121264	5.3468	3.87917	6.92586	7.45293
ENSMUSG00000045658.16	Pid1	299.545	-0.919322	0.272453	-3.37424	0.000740187	0.0121387	9.16299	10.439	4.73618	4.83955
ENSMUSG00000016763.14	Scube1	2774.95	-0.784937	0.232796	-3.37178	0.000746828	0.0122363	35.0602	25.7782	19.0723	13.3946
ENSMUSG00000021950.15	Anxa8	192.19	1.46293	0.433974	3.37101	0.000748935	0.0122595	2.96669	3.96088	6.45173	11.2794
ENSMUSG00000057967.12	Fgf18	49.8711	-1.92164	0.570193	-3.37015	0.000751266	0.0122863	4.50178	4.83197	1.15653	1.13143
ENSMUSG00000029430.13	Ran	23249.9	0.525963	0.156122	3.36893	0.000754615	0.0123298	487.201	528.637	656.954	690.369
ENSMUSG00000066720.6	Cldn9	307.294	-0.868823	0.258197	-3.36497	0.000765526	0.0124966	18.5353	17.1889	9.69468	8.30696
ENSMUSG00000037674.15	Rfx7	2906.9	0.65515	0.194761	3.36387	0.000768584	0.012535	24.3647	19.5593	29.0774	34.2195
ENSMUSG00000070394.10	Tmem256	711.167	0.718016	0.213481	3.36337	0.000769965	0.012546	61.4375	51.7391	93.4457	77.6202
ENSMUSG00000021711.16	Trappc13	2201	0.566226	0.168387	3.36264	0.000772011	0.0125627	46.627	40.1603	57.1832	60.6622
ENSMUSG00000040263.16	Klhdc4	702.515	-0.897927	0.267062	-3.36225	0.00077311	0.0125627	41.9142	29.7017	20.4944	14.7846
ENSMUSG00000078612.9	1700024P16Rik	51.5538	-2.34745	0.698173	-3.36228	0.000773019	0.0125627	1.71088	1.82172	0.490925	0.161012
ENSMUSG00000031438.11	Rnf128	637.85	0.699161	0.207992	3.36148	0.000775264	0.0125775	11.4648	11.3959	18.4187	15.8313
ENSMUSG00000078937.8	Cpt1b	86.5847	-2.9277	0.870973	-3.36142	0.000775438	0.0125775	2.11691	6.13125	0.913977	0.132301
ENSMUSG00000020949.8	Fkbp3	6702.75	0.623074	0.18541	3.36053	0.000777944	0.0126067	329.966	386.138	481.637	535.197
ENSMUSG00000028121.8	Bcar3	355.161	-0.950251	0.282847	-3.35959	0.000780572	0.0126377	15.5574	14.2671	8.40248	5.82526
ENSMUSG00000032796.7	Lama1	1742	0.577745	0.172008	3.35882	0.000782749	0.0126499	9.71748	9.22267	14.1532	11.8899
ENSMUSG00000042379.8	Esm1	52.3937	2.07659	0.618205	3.35906	0.000782075	0.0126499	0.431928	0.752463	2.27626	2.54016
ENSMUSG00000028339.17	Col15a1	957.108	-0.804694	0.239634	-3.35801	0.000785064	0.0126758	15.3117	18.6869	10.2669	7.76707
ENSMUSG00000026519.16	Tmem63a	190.576	-1.16391	0.346636	-3.35772	0.000785872	0.0126774	6.70815	6.19395	3.20409	2.13007
ENSMUSG00000006589.7	Aprt	2643.25	0.58121	0.173148	3.35673	0.000788709	0.0127116	147.597	166.748	224.161	210.249
ENSMUSG00000036502.14	Tmem255a	1116.49	0.862538	0.25706	3.3554	0.000792506	0.0127612	12.5652	18.1136	24.9865	26.7837
ENSMUSG00000028600.15	Podn	49.9295	-2.75382	0.82099	-3.35427	0.000795753	0.0128019	2.53049	0.782302	0.31677	0.124984
ENSMUSG00000026321.7	Tnfrsf11a	71.9788	-1.63068	0.486234	-3.3537	0.000797379	0.0128165	2.52169	1.87827	0.69577	0.592449
ENSMUSG00000024986.11	Hhex	193.734	-1.34968	0.402615	-3.35228	0.000801492	0.0128593	13.0537	7.06296	3.9697	3.20259
ENSMUSG00000038331.15	Satb2	346.543	0.838075	0.249987	3.35247	0.000800946	0.0128593	3.00755	2.5735	4.83769	4.3285
ENSMUSG00000021262.14	Evl	3485.86	-0.570686	0.170291	-3.35124	0.000804512	0.0128961	131.117	120.535	86.648	69.4899
ENSMUSG00000020024.6	Cep83	1788.67	0.6701	0.200068	3.34937	0.000809962	0.0129631	33.0445	26.7276	40.1315	46.9085
ENSMUSG00000057113.13	Npm1	41927	0.59062	0.176341	3.3493	0.000810151	0.0129631	1771.11	1594.33	2099.74	2548.71
ENSMUSG00000054280.14	Prr14l	2195.92	0.554382	0.165616	3.3474	0.000815726	0.0130406	12.5599	12.392	16.2298	17.4832
ENSMUSG00000021108.17	Prkch	540.406	-0.899428	0.268722	-3.34706	0.000816737	0.013045	13.8542	11.8218	7.58959	5.09276
ENSMUSG00000004558.14	Ndrg2	292.708	-1.05072	0.314067	-3.34555	0.000821203	0.0131046	14.0202	9.77501	4.71504	5.73188
ENSMUSG00000022965.7	Ifngr2	677.911	-0.685942	0.205051	-3.34523	0.000822156	0.013108	17.9487	15.2729	9.32487	9.59702
ENSMUSG00000005354.15	Txn2	1250.79	0.756472	0.226166	3.34476	0.00082353	0.0131182	58.8379	77.0288	105.508	106.985
ENSMUSG00000019789.8	Hey2	518.66	-0.767893	0.229655	-3.34368	0.000826754	0.0131455	16.5292	16.4641	8.31277	9.5226
ENSMUSG00000032135.14	Mcam	1766.84	-0.565275	0.16907	-3.34344	0.000827463	0.0131455	46.9702	47.5406	31.5892	27.3436
ENSMUSG00000096006.1	Gm21596	3088.4	0.573892	0.171624	3.34388	0.000826147	0.0131455	120.799	122.075	156.171	176.376
ENSMUSG00000050069.3	Grem2	33.4997	2.80266	0.83835	3.34307	0.000828571	0.0131513	0.060869	0.205096	1.02139	0.844749
ENSMUSG00000025001.11	Hells	5954.22	0.6384	0.191027	3.34193	0.00083198	0.0131937	57.6439	60.2102	75.3294	93.2712
ENSMUSG00000101013.1	A630072M18Rik	43.6492	-3.00702	0.899986	-3.34118	0.000834231	0.0132176	1.52146	0.364763	0.066862	0.135394
ENSMUSG00000025374.13	Nabp2	861.304	-0.611499	0.183103	-3.33965	0.000838834	0.0132787	59.8927	57.8749	35.754	35.1601
ENSMUSG00000029195.10	Klb	57.2737	3.79178	1.13551	3.33929	0.000839934	0.0132843	0.12879	0.178616	3.77323	0.222579
ENSMUSG00000028960.18	Ube4b	5588.57	-0.484283	0.145073	-3.3382	0.000843219	0.0133244	98.8181	89.1777	65.2344	58.4167
ENSMUSG00000031078.15	Cttn	6425.64	-0.509873	0.152937	-3.33388	0.000856436	0.0135212	200.776	167.152	121.024	116.239
ENSMUSG00000078903.10	Gm14391	226.917	1.2837	0.385098	3.33343	0.000857836	0.0135313	4.28379	6.35525	9.94244	13.9452
ENSMUSG00000030268.17	Bcat1	3144.16	0.677476	0.20329	3.33255	0.000860532	0.013558	65.8765	49.1198	93.8133	74.9749
ENSMUSG00000034701.9	Neurod1	610.62	-3.119	0.935968	-3.33238	0.000861054	0.013558	26.2646	25.45	4.52743	1.01542
ENSMUSG00000029094.11	Afap1	1997.35	-0.698621	0.209666	-3.33207	0.00086202	0.0135612	27.8782	22.2146	16.2315	12.1546
ENSMUSG00000030782.15	Tgfb1i1	488.078	-0.728609	0.218723	-3.33119	0.000864764	0.0135923	14.255	14.4111	8.33756	7.60929
ENSMUSG00000022360.7	Atad2	6372.98	0.670263	0.201318	3.32937	0.000870417	0.0136589	59.7918	51.9413	70.9921	91.8593
ENSMUSG00000039781.14	Cep131	1417.02	-0.736555	0.221232	-3.32933	0.000870537	0.0136589	58.0363	43.7601	31.7141	24.3758
ENSMUSG00000029638.17	Glcci1	617.259	-0.844714	0.253819	-3.32802	0.000874661	0.0137115	10.6492	13.2697	5.72494	6.60133
ENSMUSG00000029012.11	Orc5	1827.97	0.570516	0.171512	3.32638	0.000879812	0.013768	45.3247	47.5909	62.1282	65.0324
ENSMUSG00000079487.11	Med12	2502.7	-0.527496	0.158569	-3.32661	0.000879104	0.013768	49.6589	46.5095	32.9515	28.508
ENSMUSG00000032312.6	Csk	3278.15	-0.651014	0.195743	-3.32586	0.000881453	0.0137774	99.2894	88.7747	63.7596	46.6644
ENSMUSG00000078864.10	Gm14322	92.2914	1.52052	0.457202	3.3257	0.000881963	0.0137774	3.71506	2.45974	7.5844	8.36695
ENSMUSG00000079391.10	Gm2974	184.725	1.07574	0.32352	3.32512	0.000883797	0.0137939	3.75139	3.948	7.12973	7.81565
ENSMUSG00000026383.14	Epb41l5	2129.8	0.600134	0.1805	3.32485	0.000884653	0.0137952	19.7853	19.093	25.1279	29.0249
ENSMUSG00000047496.6	Rnf152	123.902	1.64248	0.494073	3.32437	0.000886171	0.0138067	0.509317	0.406034	0.893679	1.70753
ENSMUSG00000022020.14	Naa16	1130.79	0.630289	0.189612	3.32411	0.000887025	0.0138079	17.0967	14.6398	21.5991	23.4081
ENSMUSG00000028445.7	Enho	369.315	-0.789257	0.237498	-3.32321	0.000889869	0.013828	23.8245	23.6935	12.8475	12.4935
ENSMUSG00000092116.1	Gm10320	74.1103	3.28401	0.988169	3.32333	0.000889506	0.013828	1.77973	1.61711	2.59602	27.0716
ENSMUSG00000052137.11	Rbm12b2	1619.61	0.595741	0.179336	3.32193	0.000893969	0.0138674	25.4613	26.3304	34.4282	37.6305
ENSMUSG00000060510.13	Zfp266	10836.8	0.643278	0.193645	3.32195	0.000893907	0.0138674	90.197	83.4566	108.855	139.854
ENSMUSG00000028577.13	Plaa	5046.8	0.548094	0.165067	3.32043	0.000898789	0.01393	89.5828	89.6606	113.27	127.707
ENSMUSG00000010086.17	Rnf112	112.713	-1.78521	0.537859	-3.31911	0.000903056	0.013984	2.93496	4.1619	1.35256	0.571397
ENSMUSG00000019841.15	Rev3l	3378.76	0.852325	0.256869	3.31813	0.000906208	0.0140084	23.6537	15.5398	27.635	36.8546
ENSMUSG00000046861.9	Hectd3	942.563	-0.707439	0.213194	-3.31829	0.000905711	0.0140084	20.7518	16.7294	11.7072	9.38768
ENSMUSG00000050989.9	Sepn1	2430.21	-0.555277	0.167486	-3.31537	0.000915223	0.0141355	61.0968	51.8615	37.7662	32.8939
ENSMUSG00000090386.9	Mir99ahg	439.665	0.866926	0.261524	3.3149	0.000916747	0.0141467	12.951	10.7704	17.7849	21.6879
ENSMUSG00000047832.8	Cdca4	4148.32	0.504706	0.152265	3.31466	0.000917553	0.0141469	98.8327	84.4431	120.375	118.366
ENSMUSG00000090112.8	Shprh	2745.49	0.844333	0.254829	3.31333	0.00092193	0.014202	19.7141	13.0053	23.1911	30.3555
ENSMUSG00000063796.8	Slc22a8	17.3843	7.3609	2.22192	3.31285	0.000923503	0.014214	0	0	1.17897	0.027874
ENSMUSG00000026470.14	Stx6	842.39	-0.642013	0.193861	-3.31171	0.00092726	0.0142594	39.6958	42.4003	24.6356	23.956
ENSMUSG00000006930.15	Hap1	307.215	-0.940878	0.284177	-3.31089	0.000929992	0.0142891	11.5113	8.40952	4.99376	4.50252
ENSMUSG00000042372.4	Dmrt3	41.1116	-2.28868	0.691561	-3.30944	0.000934818	0.0143508	2.14339	1.55792	0.240687	0.441131
ENSMUSG00000079396.4	Gm3411	249.695	0.984994	0.297696	3.30872	0.000937237	0.0143756	5.53488	5.29101	8.97852	10.7543
ENSMUSG00000001025.8	S100a6	86.4692	-1.50419	0.454693	-3.30813	0.000939203	0.0143809	10.0871	12.2741	4.01725	3.30452
ENSMUSG00000001985.9	Grik3	138.209	-1.32025	0.399091	-3.30815	0.000939161	0.0143809	1.72352	1.12708	0.576624	0.465713
ENSMUSG00000055027.17	Smyd1	343.573	0.89759	0.271356	3.3078	0.000940327	0.0143857	4.28514	5.01683	8.76056	7.33317
ENSMUSG00000032254.9	Kif23	3901.48	0.506476	0.153135	3.30738	0.000941735	0.0143949	60.2917	60.9697	77.6555	80.9383
ENSMUSG00000006050.11	Sra1	1962.82	0.695943	0.210706	3.3029	0.000956893	0.014614	63.7103	77.8818	117.335	95.2154
ENSMUSG00000026784.14	Pdss1	478.588	0.749174	0.226919	3.3015	0.000961699	0.0146748	14.8236	13.1643	20.8665	22.294
ENSMUSG00000002319.15	Ipo4	2618.42	-0.885975	0.268411	-3.30082	0.00096403	0.0146858	137.948	83.6131	63.6107	46.2437
ENSMUSG00000021270.13	Hsp90aa1	28602.8	0.600756	0.182003	3.30081	0.000964074	0.0146858	458.66	455.288	568.497	704.238
ENSMUSG00000020124.9	Usp15	3286	0.609784	0.184792	3.29984	0.000967402	0.0147239	53.554	50.4109	65.9669	79.6304
ENSMUSG00000009654.4	Oit3	46.2945	-2.92441	0.887247	-3.29605	0.000980536	0.0148896	0.837886	2.98533	0.347297	0.13009
ENSMUSG00000038784.13	Cnot4	1615.71	0.610168	0.185106	3.29632	0.000979617	0.0148896	26.1531	23.1802	32.3072	36.7282
ENSMUSG00000079553.10	Kifc1	1336.03	-0.805264	0.244317	-3.29598	0.000980801	0.0148896	52.3878	49.2909	32.7421	21.0218
ENSMUSG00000031292.14	Cdkl5	482.276	0.860603	0.261193	3.29489	0.000984592	0.0149344	2.55039	2.03949	3.40651	4.204
ENSMUSG00000023008.18	Fmnl3	2491.41	-0.583347	0.17716	-3.29278	0.000992037	0.0150345	53.0854	42.1565	30.7926	27.5616
ENSMUSG00000057561.9	Eif1a	4552.39	0.52363	0.159236	3.2884	0.00100759	0.0152572	81.5969	85.3976	107.155	113.912
ENSMUSG00000048997.17	Atxn7l2	643.336	-0.650649	0.197935	-3.28719	0.00101194	0.0153099	19.7106	18.5556	11.6351	10.7933
ENSMUSG00000033307.6	Mif	10184.6	0.711272	0.216422	3.28651	0.00101437	0.0153337	751.471	1036.27	1360.32	1347.23
ENSMUSG00000038058.14	Nod1	99.0601	-1.41101	0.429488	-3.28532	0.00101865	0.0153723	1.89516	2.37775	0.78899	0.698366
ENSMUSG00000054150.11	Syne3	54.9973	2.50737	0.763157	3.28553	0.00101792	0.0153723	0.062903	0.300431	1.05149	0.99894
ENSMUSG00000007682.5	Dio2	243.928	1.08077	0.32918	3.28322	0.00102628	0.0154743	1.74926	1.72435	2.83196	3.89598
ENSMUSG00000079491.9	H2-T10	187.507	1.67124	0.509123	3.2826	0.00102856	0.0154955	1.66119	2.91669	9.53481	4.28267
ENSMUSG00000032113.15	Chek1	2712.69	0.750196	0.228616	3.28147	0.00103269	0.0155445	48.1779	43.0499	58.622	81.9457
ENSMUSG00000028496.17	Mllt3	2110.84	0.990308	0.301834	3.28097	0.0010345	0.0155587	18.2696	18.5801	23.9637	43.0801
ENSMUSG00000030741.15	Spns1	1386.13	-0.579048	0.176525	-3.28027	0.00103709	0.0155843	55.3844	46.7188	32.8336	29.907
ENSMUSG00000074892.9	B3galt5	32.07	2.93073	0.893554	3.27985	0.00103861	0.0155941	0.064737	0.109377	0.923774	0.361605
ENSMUSG00000022361.14	Zhx1	2173.46	1.00291	0.306338	3.27388	0.00106081	0.015914	29.2938	16.993	34.0858	50.1716
ENSMUSG00000061808.3	Ttr	576.931	9.48591	2.89997	3.27104	0.00107152	0.0160611	0.187004	0	112.288	2.19316
ENSMUSG00000026739.13	Bmi1	3739.11	0.585726	0.179089	3.27059	0.00107325	0.0160735	54.9124	60.8407	75.7308	84.3372
ENSMUSG00000024892.15	Pcx	860.058	-0.733475	0.224445	-3.26795	0.00108328	0.0161963	16.9169	16.4376	10.7159	7.81675
ENSMUSG00000028373.16	Astn2	182.152	-1.08316	0.331436	-3.26809	0.00108276	0.0161963	3.53817	2.9894	1.28481	1.53309
ENSMUSG00000022674.14	Ube2v2	385.811	0.802141	0.245489	3.26752	0.00108494	0.0162076	16.1509	13.5654	25.4908	22.1202
ENSMUSG00000029771.12	Irf5	249.348	-1.12059	0.343046	-3.26658	0.00108856	0.0162368	15.0891	10.7109	6.51142	4.3734
ENSMUSG00000044477.10	Zfand3	3111.04	-0.528159	0.161688	-3.26653	0.00108873	0.0162368	94.631	86.5334	62.8874	52.8149
ENSMUSG00000025986.6	Slc39a10	7073.48	0.610013	0.186789	3.26579	0.00109158	0.0162658	67.6337	74.3831	91.0343	108.421
ENSMUSG00000012296.15	Tjap1	628.542	-1.49302	0.457306	-3.26481	0.00109536	0.0163084	12.0411	33.4483	8.63945	6.51091
ENSMUSG00000031636.6	Pdlim3	645.305	-0.780381	0.239049	-3.26453	0.00109647	0.0163113	34.8409	31.8758	20.8036	15.0128
ENSMUSG00000038366.15	Lasp1	4133.71	-0.553464	0.169581	-3.26372	0.00109961	0.0163442	109.27	86.8829	64.4037	58.299
ENSMUSG00000041797.7	Abca9	55.6494	-2.23412	0.68468	-3.26301	0.00110237	0.0163717	0.795846	1.04486	0.097918	0.264629
ENSMUSG00000032006.14	Pdgfd	261.259	1.0587	0.324646	3.2611	0.00110982	0.0164685	4.88889	3.91065	7.14443	9.49676
ENSMUSG00000037852.7	Cpe	1895.55	-0.524889	0.161032	-3.25954	0.00111593	0.0165454	72.6115	65.6287	43.6362	44.6501
ENSMUSG00000039913.12	Pak7	164.069	1.24504	0.382063	3.25874	0.00111907	0.0165505	1.17732	1.72283	3.075	3.38089
ENSMUSG00000042035.11	Igsf3	2766.07	-0.552354	0.169487	-3.25898	0.00111813	0.0165505	34.3665	28.7965	21.2851	18.3062
ENSMUSG00000090063.5	Dlx6os1	481.202	-3.24852	0.996854	-3.25877	0.00111897	0.0165505	15.466	9.70113	2.02258	0.430898
ENSMUSG00000041842.15	Fhdc1	510.708	-0.692762	0.212635	-3.25799	0.00112206	0.0165809	9.59861	9.15301	5.34169	5.32735
ENSMUSG00000033316.14	Galnt9	45.8799	-2.38573	0.732396	-3.25743	0.00112428	0.0165999	2.11063	1.3946	0.163473	0.435987
ENSMUSG00000063108.14	Zfp26	3484.7	0.82033	0.252215	3.2525	0.00114394	0.0168762	33.3867	23.2214	38.3368	52.8318
ENSMUSG00000021268.17	Meg3	6972.96	-0.691733	0.212721	-3.25183	0.00114664	0.0169019	212.781	246.057	153.557	109.406
ENSMUSG00000001089.14	Luzp1	5789.74	0.487002	0.149775	3.25156	0.00114772	0.0169039	43.5588	44.3235	55.5484	57.8345
ENSMUSG00000021678.8	F2rl1	75.9601	1.59422	0.490392	3.25091	0.00115038	0.0169291	0.819457	0.934169	2.83142	2.10457
ENSMUSG00000042626.13	Shc1	3409.58	-0.527117	0.162206	-3.24968	0.00115534	0.016988	95.1325	78.6763	57.8553	52.9041
ENSMUSG00000049999.4	Ppp1r3d	397.126	-0.818946	0.252054	-3.24909	0.00115775	0.0170093	9.35369	10.5834	5.64197	4.82957
ENSMUSG00000024287.7	Thoc1	4585.36	0.624416	0.192217	3.2485	0.00116015	0.0170295	66.0786	54.8395	77.0566	93.6524
ENSMUSG00000027680.15	Fxr1	8452.82	0.498036	0.153323	3.24828	0.00116104	0.0170295	164.189	156.347	198.191	217.794
ENSMUSG00000027706.8	Sec62	5259.28	0.456418	0.140523	3.24799	0.00116222	0.0170328	79.7215	72.8939	97.2387	95.3052
ENSMUSG00000017499.15	Cdc6	2422.28	0.704298	0.216965	3.24613	0.00116984	0.0171303	29.1663	31.0702	39.043	51.184
ENSMUSG00000040111.14	Gramd1b	381.882	1.26563	0.38999	3.24529	0.00117331	0.017167	3.24969	5.01993	11.887	6.49888
ENSMUSG00000044288.6	Cnr1	673.866	-0.67625	0.208414	-3.24474	0.00117557	0.0171859	8.97074	9.79299	5.42894	5.4097
ENSMUSG00000021733.9	Slc4a7	2661.6	0.674315	0.207836	3.24446	0.00117673	0.0171887	20.4433	15.4757	23.9865	28.41
ENSMUSG00000026377.12	Nifk	3258.83	0.60045	0.18523	3.24164	0.00118844	0.0173456	85.0986	91.3434	113.612	132.59
ENSMUSG00000032966.14	Fkbp1a	2867.83	-0.955073	0.294692	-3.24092	0.00119147	0.0173612	276.928	140.71	102.413	94.2318
ENSMUSG00000072066.6	6720489N17Rik	572.148	0.931124	0.287294	3.24102	0.00119103	0.0173612	12.2648	7.7526	15.9512	18.7058
ENSMUSG00000059474.13	Mbtd1	4953.17	0.965062	0.297802	3.24062	0.00119271	0.0173651	38.9833	68.7925	89.2574	105.801
ENSMUSG00000038510.12	Rpf2	1400.83	0.963348	0.297399	3.23924	0.00119847	0.0174347	24.3687	41.5573	57.4356	61.9924
ENSMUSG00000028223.8	Decr1	1928.3	0.523502	0.16171	3.23728	0.00120674	0.0175264	36.034	33.3612	44.9465	46.7202
ENSMUSG00000042349.13	Ikbke	102.813	-1.9647	0.606894	-3.2373	0.00120668	0.0175264	2.11107	3.7854	0.415299	0.978171
ENSMUSG00000027223.15	Mapk8ip1	1776.04	-0.576084	0.177969	-3.23698	0.001208	0.0175303	44.9779	49.455	30.9216	27.59
ENSMUSG00000020866.17	Cacna1g	763.729	-1.0861	0.335571	-3.23658	0.0012097	0.0175358	22.3862	13.162	9.60342	5.77691
ENSMUSG00000021182.14	Ccdc88c	1110.62	-0.675583	0.208758	-3.2362	0.00121134	0.0175358	15.8362	12.2503	8.78548	7.34609
ENSMUSG00000041734.15	Kirrel	3944.95	-0.621882	0.192161	-3.23625	0.00121109	0.0175358	47.1614	39.4078	29.5008	22.2856
ENSMUSG00000033717.5	Adra2a	87.0128	-1.61273	0.498887	-3.23267	0.0012264	0.0177394	2.87271	1.60528	0.6595	0.663681
ENSMUSG00000033965.10	Slc16a2	371.253	-1.3362	0.413417	-3.2321	0.00122886	0.0177512	12.3482	5.19205	3.44911	2.85483
ENSMUSG00000052105.16	Mtcl1	739.585	-0.96776	0.299429	-3.23201	0.00122921	0.0177512	13.5112	9.49824	6.69781	4.11206
ENSMUSG00000038872.9	Zfhx3	4347.01	-0.694595	0.214945	-3.23149	0.00123145	0.0177588	26.5264	18.2949	13.9523	11.4529
ENSMUSG00000068457.14	Uty	710.704	0.894492	0.27681	3.23143	0.00123174	0.0177588	7.07962	8.11226	15.944	10.2923
ENSMUSG00000031403.14	Dkc1	3935.95	0.511616	0.158376	3.23039	0.00123621	0.0178089	85.3503	92.1127	121.268	112.214
ENSMUSG00000034685.4	Fam171a2	1379.54	-0.610191	0.188929	-3.22973	0.00123907	0.0178211	37.9241	35.2557	24.627	19.5648
ENSMUSG00000059810.18	Rgs3	1336.13	-0.668368	0.206931	-3.22991	0.00123828	0.0178211	43.6196	40.9189	28.1998	20.8808
ENSMUSG00000021338.17	Lrrc16a	909.666	-0.900475	0.278869	-3.22903	0.00124212	0.0178506	25.287	15.3589	11.0892	8.81472
ENSMUSG00000056025.12	Clca3a1	36.7473	2.80962	0.870246	3.22853	0.00124427	0.0178671	0.06002	0.226059	0.739582	1.27391
ENSMUSG00000028005.13	Gucy1b3	631.13	1.05856	0.328191	3.22545	0.00125776	0.0180316	7.35566	11.0582	14.5817	20.9524
ENSMUSG00000062963.10	Ufc1	1602.86	-0.553923	0.171726	-3.22561	0.00125704	0.0180316	115.275	120.695	73.038	75.0137
ENSMUSG00000004661.15	Arid3b	1958.28	-0.727377	0.225539	-3.22506	0.00125946	0.0180414	57.1518	38.671	25.4448	27.4092
ENSMUSG00000078881.10	Gm14434	264.281	1.66499	0.516316	3.22474	0.00126085	0.0180469	8.82663	2.60982	15.6089	16.7859
ENSMUSG00000079509.10	Zfx	3321.2	0.664512	0.20609	3.22438	0.00126247	0.0180554	28.1445	24.168	33.2162	42.7236
ENSMUSG00000063273.11	Naa15	7492.68	0.606017	0.187968	3.22404	0.00126395	0.0180621	76.2121	57.5185	88.442	97.895
ENSMUSG00000037428.14	Vgf	31.079	-2.33747	0.72525	-3.22299	0.0012686	0.018114	1.28592	1.13441	0.222805	0.215977
ENSMUSG00000023387.7	Kcnk16	32.0661	3.38779	1.05135	3.22232	0.00127156	0.0181417	0	0.720179	3.50946	4.40252
ENSMUSG00000036916.13	Zfp280c	1997.11	0.767947	0.23836	3.2218	0.0012739	0.0181605	31.4779	20.6043	37.9543	42.9335
ENSMUSG00000039883.5	Lrrc17	300.05	-0.925624	0.287382	-3.22088	0.00127797	0.0182038	13.6695	9.98321	5.54509	5.82002
ENSMUSG00000026841.7	Fibcd1	46.9587	-2.00644	0.623161	-3.21978	0.00128289	0.0182593	1.07509	0.961763	0.176369	0.284881
ENSMUSG00000050550.7	Gm11868	442.293	0.873767	0.271432	3.21911	0.00128591	0.0182877	11.7886	15.2047	21.8835	24.0893
ENSMUSG00000029276.13	Glmn	1240.5	0.650686	0.202153	3.21878	0.00128739	0.0182941	41.5557	31.8952	51.3776	54.0678
ENSMUSG00000022206.6	Npr3	1413.58	0.713892	0.221809	3.21849	0.00128867	0.0182977	9.83089	10.0766	13.0497	16.9435
ENSMUSG00000037621.8	Atoh8	493.799	-0.729685	0.226751	-3.218	0.00129088	0.0183144	16.9273	16.776	10.2695	8.50313
ENSMUSG00000025196.4	Cpn1	150.768	2.51568	0.782818	3.21363	0.00131071	0.0185809	0.279286	2.63721	9.78512	6.34927
ENSMUSG00000021703.8	Serinc5	1843.86	0.612593	0.190668	3.21288	0.00131411	0.0186143	16.3371	18.8929	24.159	25.5766
ENSMUSG00000027820.12	Mme	1609.36	0.877356	0.273101	3.21256	0.00131556	0.01862	13.6834	9.31269	15.9376	22.5817
ENSMUSG00000026646.16	Suv39h2	1572.91	0.531583	0.165518	3.21163	0.00131983	0.0186656	29.6427	30.3544	40.8278	39.1131
ENSMUSG00000017978.18	Cadps2	122.941	-1.22912	0.382785	-3.211	0.00132275	0.0186875	2.74946	2.16596	0.917318	0.997436
ENSMUSG00000066113.15	Adamtsl1	116.338	1.24327	0.387211	3.21084	0.00132348	0.0186875	0.816416	0.703208	1.58799	1.70015
ENSMUSG00000039706.11	Ldb2	747.51	-0.860138	0.267997	-3.2095	0.00132965	0.0187449	30.5419	21.3423	11.4499	14.6007
ENSMUSG00000042473.8	Tbc1d8b	229.937	1.30907	0.407846	3.2097	0.00132871	0.0187449	2.50897	1.21677	3.82783	4.47336
ENSMUSG00000001510.8	Dlx3	79.8248	-2.40595	0.750381	-3.20631	0.00134449	0.0189301	4.87977	1.82391	0.903895	0.251531
ENSMUSG00000025037.6	Maoa	1794.03	0.588421	0.183525	3.20622	0.00134493	0.0189301	23.0478	21.298	28.4386	32.7776
ENSMUSG00000046223.10	Plaur	155.486	1.93252	0.602809	3.20586	0.00134659	0.0189385	1.13932	4.1435	11.2323	8.0091
ENSMUSG00000017466.9	Timp2	2678.33	-0.483461	0.150819	-3.20556	0.00134799	0.0189432	57.3416	51.3804	36.4625	35.0178
ENSMUSG00000044167.6	Foxo1	1184.37	0.586441	0.183097	3.2029	0.0013605	0.019104	6.82251	7.22791	9.56748	9.89551
ENSMUSG00000024109.18	Nrxn1	86.3242	-1.99522	0.623251	-3.20132	0.00136801	0.0191942	0.805702	2.18631	0.333519	0.364034
ENSMUSG00000038193.3	Hand2	1905.11	-0.726571	0.227358	-3.19571	0.00139487	0.0195557	82.4395	55.2259	40.8189	35.388
ENSMUSG00000081603.1	Gm14681	6030.66	0.517095	0.161901	3.19389	0.00140368	0.0196636	862.149	697.824	1018.64	1029.06
ENSMUSG00000040997.13	Abhd4	1437.52	-0.641668	0.200963	-3.19296	0.00140823	0.0197119	51.8647	39.4412	26.0543	27.4949
ENSMUSG00000020385.16	Clk4	2880.21	0.565027	0.176995	3.19234	0.00141126	0.0197387	102.118	82.6578	120.535	129.856
ENSMUSG00000039628.8	Hs3st6	61.8633	-2.30834	0.72322	-3.19176	0.0014141	0.0197629	4.19263	6.60019	1.59085	0.455642
ENSMUSG00000027416.2	Otor	102.633	-1.33744	0.419081	-3.19137	0.00141602	0.0197742	9.82292	10.1089	4.20904	3.07395
ENSMUSG00000039841.14	Zfp800	449.19	0.728375	0.228316	3.19021	0.0014217	0.0198224	6.22566	5.98601	8.99298	9.58858
ENSMUSG00000108046.1	RP23-318B18.1	26.7625	2.7872	0.87366	3.19026	0.00142144	0.0198224	0.328281	0.194217	1.2425	1.92085
ENSMUSG00000038175.9	Mylip	739.299	-0.657294	0.2061	-3.1892	0.00142666	0.019876	18.1453	19.8631	11.7426	10.5255
ENSMUSG00000043557.15	Mdga1	213.017	-1.15309	0.361699	-3.18799	0.00143266	0.019944	2.97263	3.78588	1.18616	1.63872
ENSMUSG00000020173.17	Cobl	372.3	0.789583	0.247721	3.18739	0.00143563	0.019954	3.7866	3.33615	6.15404	5.19024
ENSMUSG00000021095.5	Gsc	39.4548	-2.15736	0.6768	-3.18759	0.00143461	0.019954	4.09653	2.45742	0.673082	0.676963
ENSMUSG00000024539.17	Ptpn2	1828.79	0.537204	0.168673	3.18489	0.00144809	0.0201115	59.143	56.4507	74.1776	80.0574
ENSMUSG00000022180.6	Slc7a8	137.387	2.40404	0.755135	3.1836	0.00145457	0.02017	0.864427	0.53377	5.92287	0.981073
ENSMUSG00000042757.15	Tmem108	346.074	-0.940654	0.295468	-3.18361	0.00145451	0.02017	9.13515	12.2458	5.54289	4.80777
ENSMUSG00000016344.14	Ppdpf	1698.46	0.599453	0.188318	3.1832	0.00145655	0.0201817	102.816	117.366	150.523	157.556
ENSMUSG00000035203.15	Epn1	2610.97	-0.481714	0.151352	-3.18274	0.00145889	0.0201984	95.3911	86.3499	62.1334	57.556
ENSMUSG00000021832.7	Psmc6	6932.93	0.582158	0.182935	3.18233	0.00146098	0.0202115	251.953	206.764	289.394	339.69
ENSMUSG00000018042.17	Cyb5r3	3984.99	-0.452732	0.142288	-3.1818	0.00146365	0.0202328	125.424	119.648	83.158	81.5819
ENSMUSG00000058291.14	Zfp68	2012.61	0.64378	0.202347	3.18156	0.00146482	0.0202331	35.0974	27.739	41.3236	48.4938
ENSMUSG00000024376.6	Epb41l4a	777.891	-0.710707	0.223412	-3.18115	0.00146689	0.0202461	18.4877	13.9453	8.78228	9.34559
ENSMUSG00000019917.9	2020-09-10	1697.58	0.592607	0.18634	3.18025	0.00147148	0.0202937	33.9468	34.6981	44.4061	50.8413
ENSMUSG00000038976.12	Ppp1r9b	3830.88	-0.515868	0.162241	-3.17964	0.00147458	0.0203206	65.1722	64.6245	45.7557	37.972
ENSMUSG00000063727.3	Tnfrsf11b	68.2574	-1.87532	0.590016	-3.17843	0.00148077	0.0203901	2.94506	1.97667	0.839954	0.392528
ENSMUSG00000024897.8	Apba1	93.9396	-1.3484	0.424306	-3.17791	0.00148343	0.0204109	1.28369	1.32625	0.521907	0.426773
ENSMUSG00000001376.17	Ccdc132	2144.66	0.546294	0.172	3.17613	0.00149256	0.0205208	33.8218	28.7051	40.506	43.2198
ENSMUSG00000028549.17	Itgb3bp	466.767	0.905741	0.285207	3.17573	0.00149461	0.020533	13.5105	9.01023	21.4837	16.9284
ENSMUSG00000071653.9	1810009A15Rik	794.949	1.33667	0.420944	3.17542	0.00149622	0.0205392	34.1947	38.8824	126.356	45.8323
ENSMUSG00000026034.17	Clk1	5050.67	0.47708	0.150288	3.17444	0.00150128	0.020563	175.238	159.648	208.179	219.982
ENSMUSG00000029695.13	Aass	216.335	1.82263	0.574163	3.17441	0.00150142	0.020563	1.68347	1.63109	8.62212	2.31789
ENSMUSG00000038765.13	Lmx1b	43.1194	-1.93657	0.609974	-3.17484	0.00149918	0.020563	0.994004	0.848685	0.229774	0.209704
ENSMUSG00000049001.5	Ndnf	591.041	-0.863164	0.271989	-3.17352	0.00150603	0.0206102	6.96965	4.56515	2.74165	3.03054
ENSMUSG00000024053.10	Emilin2	448.189	-0.789856	0.24896	-3.17262	0.00151072	0.0206123	9.94814	8.81375	5.67465	4.31294
ENSMUSG00000039943.16	Plcb4	691.483	0.648662	0.204418	3.17321	0.00150763	0.0206123	13.8139	12.2495	18.0972	19.3291
ENSMUSG00000087178.7	A230056P14Rik	69.0961	-1.53139	0.482694	-3.1726	0.00151082	0.0206123	3.12453	3.31694	1.095	0.975071
ENSMUSG00000097679.1	Rps19-ps5	378.271	0.826615	0.260525	3.17288	0.00150936	0.0206123	39.434	47.3591	74.1045	68.654
ENSMUSG00000020687.13	Cdc27	7103.95	0.623796	0.196695	3.17139	0.0015171	0.0206822	76.3748	61.2428	87.1443	106.966
ENSMUSG00000034813.16	Grip1	454.907	-0.78667	0.24811	-3.17065	0.001521	0.0207194	8.24093	8.63807	5.10867	3.94124
ENSMUSG00000022032.14	Scara5	95.3019	1.37565	0.434203	3.16823	0.00153372	0.0208767	1.01421	0.799126	2.3653	1.93895
ENSMUSG00000027082.15	Tfpi	1141.58	0.625234	0.197478	3.16609	0.00154501	0.0210143	32.9704	37.0693	53.6777	46.3045
ENSMUSG00000030352.14	Tspan9	1878.73	-0.654731	0.20685	-3.16524	0.00154956	0.0210159	70.3825	63.1947	45.4073	32.8401
ENSMUSG00000032207.9	Lipc	22.5497	5.55155	1.75394	3.16518	0.00154986	0.0210159	0	0.049195	2.64298	0.157874
ENSMUSG00000035226.5	Rims4	23.8658	-2.66417	0.841684	-3.16528	0.00154933	0.0210159	0.504735	0.561062	0.08493	0.070282
ENSMUSG00000075467.4	Dnlz	1010.88	-0.586779	0.185381	-3.16526	0.00154943	0.0210159	28.6808	25.5897	17.8184	15.4195
ENSMUSG00000103436.1	Gm36995	150.868	-1.77583	0.561314	-3.1637	0.0015578	0.0211074	4.04971	1.29113	0.668089	0.7293
ENSMUSG00000024583.2	Txnl1	6226.52	0.484062	0.15303	3.16319	0.00156052	0.0211282	129.536	131.821	162.905	173.51
ENSMUSG00000027018.11	Hat1	4697.43	0.540529	0.170914	3.16258	0.00156378	0.0211402	148.821	166.34	205.067	217.521
ENSMUSG00000029674.13	Limk1	931.96	-0.694842	0.219723	-3.16236	0.00156497	0.0211402	23.7194	22.7623	11.7214	14.6333
ENSMUSG00000040693.7	Slco4c1	42.2766	3.72972	1.17935	3.16252	0.00156411	0.0211402	0.139338	0.029442	1.7399	0.184635
ENSMUSG00000020577.15	Tspan13	2426.49	-0.477181	0.151011	-3.15992	0.00157815	0.0212925	95.6932	93.4498	64.5938	60.5508
ENSMUSG00000022199.10	Slc22a17	1421.77	-0.578604	0.183126	-3.1596	0.00157984	0.0212925	50.5767	45.2342	32.4224	26.632
ENSMUSG00000029669.14	Tspan12	2747.77	0.511452	0.161864	3.15977	0.00157895	0.0212925	65.5352	62.8488	80.6968	87.5232
ENSMUSG00000002413.15	Braf	2099.69	0.521244	0.165027	3.15854	0.0015856	0.0213378	15.755	13.2526	19.592	18.6237
ENSMUSG00000027004.3	Frzb	959.998	-0.59784	0.189269	-3.15868	0.00158485	0.0213378	25.0037	23.0599	15.8629	13.3845
ENSMUSG00000027428.9	Rbbp9	1991.25	0.580576	0.183824	3.15832	0.0015868	0.0213378	45.3118	50.7578	64.0409	68.4605
ENSMUSG00000009555.16	Cdk9	1598.49	-0.524335	0.166044	-3.1578	0.00158967	0.0213602	78.008	68.0944	48.2802	45.0594
ENSMUSG00000032407.13	U2surp	7106.28	0.999596	0.316781	3.15548	0.00160233	0.0215141	62.0237	44.4215	67.2308	126.524
ENSMUSG00000036390.8	Gadd45a	366.887	-0.835167	0.264737	-3.1547	0.00160662	0.0215553	29.9981	24.6651	15.7875	12.3679
ENSMUSG00000027674.16	Pex5l	53.8419	-2.09124	0.663008	-3.15416	0.00160959	0.0215761	2.07524	0.997208	0.408227	0.24152
ENSMUSG00000063382.5	Bcl9l	1251.03	-0.648641	0.205658	-3.15398	0.00161059	0.0215761	20.9351	16.3209	11.9517	9.86653
ENSMUSG00000024937.14	Ehbp1l1	669.123	-0.636537	0.202043	-3.1505	0.00162992	0.0217857	8.513	8.30448	5.33938	4.62788
ENSMUSG00000043336.14	Filip1l	1662.2	-0.581816	0.184662	-3.1507	0.00162878	0.0217857	34.135	28.4277	18.2599	20.0567
ENSMUSG00000101939.1	Gm28438	11037.8	0.49253	0.15633	3.15059	0.00162943	0.0217857	1632.56	1787.28	2197.53	2237.37
ENSMUSG00000027162.7	Lin7c	5715.91	0.602192	0.191191	3.14968	0.00163448	0.0218303	76.7217	63.9403	88.0752	107.51
ENSMUSG00000015112.15	Slc25a13	2778.82	0.472972	0.150187	3.14921	0.00163711	0.0218491	52.1048	48.3529	63.9008	64.2864
ENSMUSG00000028544.14	Slc5a9	22.3501	3.31299	1.05216	3.14877	0.00163961	0.0218659	0.19794	0.053279	0.949353	0.934835
ENSMUSG00000022016.15	Akap11	3561.24	0.724823	0.230232	3.14823	0.00164263	0.0218898	20.8985	16.1188	23.7872	32.1049
ENSMUSG00000013736.16	Trnt1	2172.33	0.61815	0.196398	3.14743	0.00164712	0.0219171	54.4801	44.7038	63.8865	75.4647
ENSMUSG00000032018.13	Sc5d	1065.98	0.692703	0.220086	3.14743	0.00164714	0.0219171	21.2855	25.2173	32.4065	36.9949
ENSMUSG00000054115.11	Skp2	5599.9	0.4978	0.158205	3.14656	0.00165205	0.021966	94.1012	93.6379	116.101	127.727
ENSMUSG00000030795.18	Fus	12568.1	-0.421479	0.13402	-3.14491	0.0016614	0.0220738	469.458	430.453	313.35	304.565
ENSMUSG00000034258.3	Mfsd7c	89.1355	2.21399	0.704224	3.14387	0.00166728	0.0221353	0.492787	0.672264	4.06741	1.06995
ENSMUSG00000026458.13	Ppfia4	154.532	-1.09673	0.348898	-3.14343	0.00166982	0.0221525	3.23991	2.95255	1.51545	1.14942
ENSMUSG00000022562.13	Oplah	337.675	-0.934978	0.297565	-3.1421	0.00167739	0.0222199	17.0484	11.3753	7.2644	6.33722
ENSMUSG00000048440.15	Cyp4f16	350.976	-0.834954	0.265729	-3.14213	0.00167723	0.0222199	25.95	29.2127	13.4139	15.1449
ENSMUSG00000025962.15	Fastkd2	1287.79	0.583532	0.185741	3.14164	0.00168002	0.0222381	24.9732	21.8071	30.6202	33.6299
ENSMUSG00000023033.14	Scn8a	350.745	-0.912228	0.290535	-3.13982	0.00169052	0.0223488	10.6677	7.22072	4.55193	4.12661
ENSMUSG00000041115.16	Iqsec2	196.974	-0.951332	0.302996	-3.13975	0.0016909	0.0223488	3.37016	3.48297	1.65339	1.6246
ENSMUSG00000038264.7	Sema7a	171.881	-1.15601	0.368303	-3.13874	0.00169674	0.0223962	5.58406	3.77434	2.15932	1.6705
ENSMUSG00000038555.7	Reep2	90.9089	-1.42451	0.453853	-3.1387	0.00169701	0.0223962	5.28666	3.64187	1.42042	1.59398
ENSMUSG00000031442.20	Mcf2l	456.039	-0.922999	0.294108	-3.1383	0.00169929	0.0224097	15.1779	10.1982	7.04244	5.22896
ENSMUSG00000026234.12	Ncl	38726.8	0.424421	0.135305	3.13678	0.00170816	0.02251	296.109	287.002	355.769	364.078
ENSMUSG00000003573.15	Homer3	3219.29	-0.503623	0.160675	-3.13442	0.00172195	0.0226749	128.886	126.388	90.1319	75.8809
ENSMUSG00000069833.12	Ahnak	3473.23	-0.625585	0.19961	-3.13404	0.00172418	0.0226875	15.4222	15.2989	8.02889	10.2508
ENSMUSG00000039461.12	Tcta	377.463	-0.75493	0.240966	-3.13293	0.00173071	0.0227397	20.5331	17.7159	10.9895	9.82917
ENSMUSG00000040808.4	S100g	159.232	8.5188	2.71903	3.13303	0.0017301	0.0227397	0	0.152929	78.7855	1.34126
ENSMUSG00000050288.6	Fzd2	4944.9	-0.457249	0.145969	-3.13251	0.0017332	0.0227556	107.639	93.9997	68.8798	66.073
ENSMUSG00000024081.8	Cebpz	4560.3	0.525293	0.167722	3.13193	0.00173661	0.0227835	60.0333	58.2379	72.9646	83.4539
ENSMUSG00000014226.10	Cacybp	7205.41	0.631771	0.201775	3.13106	0.00174175	0.0228341	152.638	196.026	242.761	256.233
ENSMUSG00000029260.15	Ugt2b34	40.5238	4.25693	1.35984	3.13047	0.00174529	0.0228637	0.105731	0.033511	2.26034	0.080877
ENSMUSG00000031391.18	L1cam	463.328	-0.903672	0.28881	-3.12895	0.00175432	0.022965	17.0503	11.7816	6.27507	7.79491
ENSMUSG00000033735.9	Spr	746.463	-0.601127	0.192148	-3.12846	0.00175726	0.0229866	49.0076	48.1224	30.9151	28.0633
ENSMUSG00000062202.13	Btbd9	1051.25	-0.600964	0.192139	-3.12775	0.00176151	0.0230253	13.245	10.8978	7.76168	6.85278
ENSMUSG00000046667.14	Rbm12b1	1132.27	0.597402	0.191032	3.12724	0.00176454	0.0230479	19.9808	17.9347	24.836	27.7885
ENSMUSG00000035726.7	Supt16	18266.6	0.565518	0.180946	3.12534	0.00177599	0.0231804	206.683	215.628	259.576	314.887
ENSMUSG00000047996.16	Prrg1	494.304	0.898542	0.287609	3.12418	0.00178299	0.0232515	6.40855	5.75554	8.51107	12.2507
ENSMUSG00000098206.1	A430106G13Rik	105.869	1.36345	0.436443	3.12401	0.00178405	0.0232515	1.10839	1.13487	3.19612	2.15765
ENSMUSG00000026175.12	Vil1	83.3716	5.96585	1.91002	3.12345	0.00178745	0.0232629	0.072969	0.046254	6.61975	0.225206
ENSMUSG00000102252.5	Snrpn	1091.78	0.555006	0.177691	3.12343	0.00178754	0.0232629	30.2042	27.7924	38.5822	39.7004
ENSMUSG00000029291.11	Rufy3	1137.36	-0.591559	0.189485	-3.12193	0.00179667	0.0233135	29.0219	26.2842	18.5834	15.2051
ENSMUSG00000030351.5	Tspan11	192.815	-1.16848	0.374244	-3.12223	0.00179485	0.0233135	4.11097	2.57491	1.22143	1.47986
ENSMUSG00000047604.2	Frat2	319.074	-0.926571	0.296792	-3.12195	0.00179656	0.0233135	14.2416	10.8771	7.00546	5.11417
ENSMUSG00000055799.13	Tcf7l1	2125.15	-0.60401	0.193437	-3.12251	0.00179314	0.0233135	63.6306	51.9922	39.0931	30.8756
ENSMUSG00000054690.17	Emcn	1377.64	-0.640595	0.205252	-3.12101	0.00180233	0.0233698	52.5698	63.5215	36.5405	32.4131
ENSMUSG00000028001.16	Fga	474.689	12.1319	3.88765	3.12061	0.00180474	0.023384	0	0	49.3596	0.822429
ENSMUSG00000031539.5	Ap3m2	258.065	-0.872724	0.279714	-3.12006	0.00180816	0.0234046	5.91757	6.46213	3.28151	2.97638
ENSMUSG00000037234.16	Hook3	3616.57	0.631542	0.202422	3.11993	0.00180896	0.0234046	19.5804	16.4096	22.5194	28.5367
ENSMUSG00000052087.13	Rgs14	24.3064	2.86772	0.919814	3.11772	0.00182259	0.0235637	0.096756	0.204439	0.933149	1.22031
ENSMUSG00000026094.14	Stk17b	579.104	0.733583	0.235351	3.11697	0.0018272	0.0236062	8.19987	9.06611	12.32	14.155
ENSMUSG00000032228.16	Tcf12	8199.06	0.541934	0.173926	3.11588	0.00183395	0.0236762	87.0857	102.799	131.565	123.763
ENSMUSG00000081999.3	Gm13461	2819.33	0.523822	0.16819	3.11447	0.00184275	0.0237726	215.918	233.501	291.142	304.489
ENSMUSG00000027405.16	Nop56	4445.27	0.631773	0.202865	3.11425	0.00184412	0.0237729	183.803	208.146	250.167	308.743
ENSMUSG00000047036.7	Zfp445	2321.09	0.676907	0.217382	3.1139	0.00184631	0.023784	40.1399	37.6403	48.7728	65.224
ENSMUSG00000039960.5	Rhou	1851.28	-0.628151	0.201781	-3.11303	0.00185176	0.0238369	48.2898	39.1455	29.3581	22.6806
ENSMUSG00000044499.11	Hs3st5	22.9868	-3.8196	1.22734	-3.11208	0.00185772	0.0238964	0.88268	0.905106	0.119116	0
ENSMUSG00000039197.9	Adk	2789.83	0.56864	0.182807	3.1106	0.00186707	0.0239992	75.275	86.8272	108.014	113.866
ENSMUSG00000039579.15	Grin3a	97.8765	-1.28292	0.412469	-3.11034	0.00186875	0.0240034	1.26636	1.26723	0.516747	0.444528
ENSMUSG00000038047.18	Haus6	3025.59	0.66175	0.212801	3.10971	0.00187274	0.0240374	30.4988	25.5902	35.2678	45.9603
ENSMUSG00000018209.15	Stk4	3367.68	0.497666	0.160223	3.10608	0.00189589	0.0241773	39.152	41.0154	50.9661	53.3236
ENSMUSG00000021413.8	Prpf4b	7258.66	0.639089	0.205675	3.10728	0.00188817	0.0241773	91.0269	73.2668	102.785	131.356
ENSMUSG00000027168.21	Pax6	48.0984	-1.816	0.584547	-3.10668	0.00189203	0.0241773	1.58839	1.6652	0.387044	0.465426
ENSMUSG00000027699.19	Ect2	4093.23	0.618457	0.1991	3.10627	0.00189463	0.0241773	77.7289	55.3292	91.928	94.9286
ENSMUSG00000032080.6	Apoa4	928.088	13.0991	4.21603	3.10697	0.00189014	0.0241773	0	0	123.014	0.911015
ENSMUSG00000037138.16	Aff3	2304.17	-0.655777	0.211105	-3.10641	0.00189377	0.0241773	35.0741	27.813	21.1066	15.6105
ENSMUSG00000041870.16	Ankrd13a	2687.21	-0.486415	0.156551	-3.10707	0.00188949	0.0241773	63.0739	54.2677	39.5266	37.4208
ENSMUSG00000042978.10	Sbk1	6655.12	-0.532232	0.171321	-3.10664	0.00189225	0.0241773	140.456	109.814	84.0765	74.839
ENSMUSG00000049313.8	Sorl1	2143.68	0.71662	0.230594	3.10772	0.0018854	0.0241773	12.7987	9.70177	14.678	19.0824
ENSMUSG00000060475.12	Wtap	3403.48	0.500158	0.161037	3.10586	0.00189725	0.0241774	99.0694	91.8335	135.384	113.321
ENSMUSG00000029843.4	Slc13a4	93.2839	3.28506	1.05807	3.10475	0.00190437	0.0242507	0.208867	0.447438	5.79497	0.321938
ENSMUSG00000009207.15	Lnp	1352.31	0.867876	0.279556	3.10448	0.00190617	0.0242562	24.3864	15.6069	28.1903	38.2114
ENSMUSG00000048583.16	Igf2	46771.8	-0.913643	0.294328	-3.10417	0.00190813	0.0242574	1222.21	594.734	448	431.83
ENSMUSG00000097910.1	5033428I22Rik	122.516	-1.20464	0.388089	-3.10404	0.00190899	0.0242574	6.13624	4.69193	2.04811	2.25921
ENSMUSG00000057657.3	Rps18-ps3	2113.21	0.632476	0.203789	3.10358	0.00191197	0.0242779	218.028	274.208	355.35	350.534
ENSMUSG00000031922.12	Cep57	2181.16	0.682285	0.219889	3.10286	0.00191662	0.0243195	67.8281	46.1693	81.3079	85.7382
ENSMUSG00000026761.12	Orc4	2276.69	0.699931	0.225637	3.10202	0.00192203	0.0243708	52.1905	36.0644	60.7508	70.1037
ENSMUSG00000018001.18	Cyth3	1617	-0.516627	0.166641	-3.10024	0.00193364	0.0244657	34.7125	31.8426	22.8035	20.0077
ENSMUSG00000031465.6	Angpt2	322.82	-0.959378	0.30945	-3.10026	0.00193348	0.0244657	8.78987	7.36586	4.63289	3.01647
ENSMUSG00000044763.8	Trmt10c	1357.53	0.577155	0.186154	3.10042	0.00193249	0.0244657	23.4782	23.2818	30.1793	33.9673
ENSMUSG00000072620.3	Slfn2	83.5906	1.58325	0.51075	3.09986	0.00193615	0.0244801	1.42839	1.76936	3.53001	5.38172
ENSMUSG00000084131.1	Rpl3-ps2	3752.77	0.468529	0.15117	3.09934	0.0019395	0.024505	164.266	169.555	213.268	212.431
ENSMUSG00000022469.16	Rapgef3	136.232	-1.24192	0.400774	-3.0988	0.00194303	0.0245147	5.99761	6.14461	2.91285	1.82949
ENSMUSG00000034412.13	Tbc1d10a	583.408	-0.696382	0.224725	-3.09881	0.00194299	0.0245147	27.0488	26.016	16.9055	13.3103
ENSMUSG00000011884.13	Gltp	637.852	-0.687633	0.221974	-3.09781	0.00194955	0.0245796	32.5472	25.2619	16.42	16.4277
ENSMUSG00000002763.16	Pex6	1554.04	-0.539029	0.174019	-3.09754	0.00195136	0.0245849	41.6201	35.0187	25.4028	23.0353
ENSMUSG00000038677.13	Scube3	3215.97	-0.473461	0.152926	-3.09602	0.00196137	0.0246818	43.0093	37.2085	27.3434	25.7477
ENSMUSG00000051329.13	Nup160	4022.23	0.507969	0.164087	3.09574	0.00196321	0.0246818	43.9546	42.2896	53.1313	59.5786
ENSMUSG00000089922.2	3110039M20Rik	33.5363	3.25043	1.04991	3.09592	0.00196202	0.0246818	0	0.186544	0.880842	0.980623
ENSMUSG00000019256.17	Ahr	357.647	-0.759324	0.245322	-3.09521	0.00196672	0.0246909	5.79843	5.49676	2.95404	3.17386
ENSMUSG00000079043.2	Fastkd5	976.096	0.60349	0.194972	3.09526	0.00196641	0.0246909	19.6318	20.1347	26.5194	29.1273
ENSMUSG00000073164.11	2410018L13Rik	50.2242	-1.84209	0.595432	-3.09369	0.00197681	0.0248002	2.49842	1.95649	0.466958	0.647489
ENSMUSG00000035310.15	Lin54	1159.76	0.595166	0.192505	3.09169	0.00199019	0.0249503	13.7434	13.7887	17.9642	20.2884
ENSMUSG00000025402.12	Nab2	731.017	-0.718666	0.232494	-3.09112	0.00199403	0.0249619	28.3343	21.3045	15.197	12.4801
ENSMUSG00000040044.11	Orc3	2997.82	0.560575	0.18136	3.09095	0.00199517	0.0249619	92.5634	89.2292	112.645	133.532
ENSMUSG00000046873.18	Mbtps2	981.591	0.705984	0.228405	3.09093	0.00199533	0.0249619	15.9181	13.7715	19.5106	24.7999
ENSMUSG00000033039.9	Micall1	1157.04	-0.54269	0.175595	-3.09058	0.00199767	0.0249736	14.1126	12.3195	8.46184	8.20472
ENSMUSG00000042628.7	Zfyve1	1500.96	-0.549978	0.178015	-3.0895	0.00200497	0.0250473	32.3972	27.1575	19.8176	17.5463
ENSMUSG00000021714.14	Cenpk	987.601	0.572508	0.185333	3.08908	0.00200776	0.0250645	45.3165	38.5973	57.8155	56.653
ENSMUSG00000016252.7	Atp5e	2432.29	0.885308	0.286693	3.088	0.00201509	0.0251188	130.033	147.562	307.769	168.628
ENSMUSG00000028850.2	Gpatch3	236.336	-1.01641	0.329189	-3.08761	0.00201773	0.0251188	13.4033	8.91232	4.85624	5.18134
ENSMUSG00000031503.13	Col4a2	8703.29	-0.682219	0.22091	-3.08823	0.00201353	0.0251188	131.938	91.0359	72.3106	55.2915
ENSMUSG00000039704.6	Lmbrd2	464.849	0.716042	0.231908	3.08761	0.00201775	0.0251188	6.51614	5.27337	8.98091	8.73616
ENSMUSG00000025724.12	Sec11a	2527.44	0.663	0.214785	3.08681	0.00202316	0.0251684	135.839	141.937	174.793	229.408
ENSMUSG00000014956.15	Ppp1cb	15329.9	0.595123	0.192867	3.08567	0.00203097	0.0252187	139.948	136.492	167.65	215.556
ENSMUSG00000042106.5	Fam212a	830.96	-0.590973	0.191539	-3.08539	0.00203288	0.0252187	66.6389	59.3796	40.9183	36.0183
ENSMUSG00000049482.15	Ctu2	568.572	-0.86387	0.279986	-3.0854	0.00203276	0.0252187	41.4873	32.3545	22.5021	14.8898
ENSMUSG00000057594.12	Arl16	386.536	0.78532	0.254523	3.08546	0.00203239	0.0252187	16.3668	15.9639	23.498	27.6545
ENSMUSG00000021392.7	Nol8	1659.49	0.791895	0.256689	3.08503	0.00203529	0.0252311	22.4263	14.724	25.9426	32.678
ENSMUSG00000062329.4	Cytl1	34.8516	-2.84211	0.921412	-3.08451	0.00203887	0.0252578	4.49713	4.11521	0.975969	0.155524
ENSMUSG00000052713.8	Zfp608	2295.6	-0.500478	0.162304	-3.08359	0.00204517	0.0253182	29.5796	27.1886	17.8191	19.0421
ENSMUSG00000031352.10	Hccs	1050.55	0.556854	0.180642	3.08264	0.00205175	0.025382	22.5686	23.1307	32.444	29.6028
ENSMUSG00000020561.7	Twistnb	1378.94	0.698005	0.226553	3.08098	0.00206318	0.0255057	31.5355	26.9208	37.5501	49.209
ENSMUSG00000021112.8	Mpp5	2670.82	0.731744	0.23764	3.07921	0.0020755	0.0256402	27.7476	19.4322	31.4425	40.0601
ENSMUSG00000030061.16	Uba3	2502.06	0.504509	0.163904	3.07808	0.00208336	0.0257193	63.3489	53.5061	75.3175	76.7257
ENSMUSG00000051579.10	Tceal8	6022.33	0.489289	0.159005	3.07719	0.0020896	0.0257785	253.359	260.209	317.27	346.158
ENSMUSG00000034981.9	Parm1	2035.06	-0.583242	0.189576	-3.07656	0.00209406	0.0258156	33.8896	28.3198	17.6647	20.383
ENSMUSG00000024064.13	Galnt14	44.9619	-2.18693	0.711013	-3.07579	0.00209942	0.0258638	1.95617	1.33488	0.470148	0.185537
ENSMUSG00000040929.16	Rfx3	1822.77	0.95794	0.311544	3.07481	0.00210636	0.0259312	11.4374	7.80832	12.6145	21.41
ENSMUSG00000000555.6	Itga5	2081.1	-0.56048	0.182351	-3.07364	0.00211468	0.0260156	38.9165	34.1978	25.3943	20.2444
ENSMUSG00000089715.11	Cbx6	1268.62	-0.725779	0.23617	-3.07312	0.00211834	0.0260426	32.4753	27.2061	19.8223	13.448
ENSMUSG00000027423.15	Snx5	9319.61	0.468652	0.15255	3.07212	0.00212547	0.0260978	227.645	242.348	295.155	304.014
ENSMUSG00000058966.13	Fam57b	40.9685	-2.05922	0.670301	-3.07208	0.00212576	0.0260978	1.50731	2.2258	0.491552	0.339492
ENSMUSG00000002603.15	Tgfb1	564.767	-0.842335	0.274317	-3.07066	0.00213586	0.0261913	21.5388	23.5186	14.0373	9.2474
ENSMUSG00000029163.9	Emilin1	3997.23	-0.556636	0.18128	-3.0706	0.00213632	0.0261913	83.639	78.5277	57.7141	43.9851
ENSMUSG00000046768.13	Rhoj	752.863	-0.724068	0.235943	-3.06882	0.00214904	0.0263291	25.4571	25.822	12.52	16.0506
ENSMUSG00000023039.16	Krt7	1763.17	0.744636	0.242713	3.06797	0.0021552	0.0263863	20.6327	26.8682	32.7337	40.7458
ENSMUSG00000034584.3	Exph5	232.397	1.37825	0.449295	3.06759	0.00215796	0.0264019	1.81682	1.07312	2.35346	4.43393
ENSMUSG00000025584.17	Pde8a	347.982	-0.810276	0.264296	-3.06579	0.00217093	0.0265363	7.57359	7.57005	4.51903	3.46995
ENSMUSG00000028995.14	Fam126a	2169.77	0.53752	0.175336	3.06566	0.00217192	0.0265363	24.3711	25.0978	31.3365	34.7661
ENSMUSG00000040957.14	Cables1	347.436	-0.740318	0.241535	-3.06506	0.0021763	0.0265714	8.56962	8.12114	4.76731	4.44377
ENSMUSG00000019467.13	Arhgef25	1930.25	-0.53847	0.175759	-3.06368	0.00218635	0.0266759	69.2474	61.254	39.079	43.3663
ENSMUSG00000025930.6	Msc	224.536	1.94934	0.636357	3.06329	0.00218921	0.0266925	1.3337	6.63611	18.7973	11.2251
ENSMUSG00000069793.11	Slfn9	1022.72	0.967343	0.315988	3.06133	0.00220357	0.0268491	15.6342	10.2045	17.7081	28.124
ENSMUSG00000022865.13	Cxadr	3456.39	0.600576	0.196313	3.05927	0.00221875	0.0269788	33.8585	33.8008	41.7491	52.4686
ENSMUSG00000024234.6	Mtpap	1701.33	0.572477	0.187129	3.05927	0.00221877	0.0269788	32.9632	33.4617	42.2305	48.6575
ENSMUSG00000063428.7	Ddo	37.7224	2.05327	0.671118	3.05948	0.00221718	0.0269788	0.303944	0.320678	1.13691	1.25695
ENSMUSG00000102918.1	Pcdhgc3	2282.46	-0.592237	0.193609	-3.05893	0.0022213	0.0269911	58.3043	45.4973	34.7324	28.4983
ENSMUSG00000021198.16	Unc79	39.1685	-1.95835	0.640356	-3.05822	0.00222657	0.0270078	0.449291	0.480108	0.117273	0.101703
ENSMUSG00000025219.13	Fgf8	134.51	-2.03208	0.664505	-3.05803	0.00222799	0.0270078	17.6696	10.4259	5.24277	1.15629
ENSMUSG00000039753.16	Fbxl5	2841.26	0.557041	0.182163	3.05793	0.00222875	0.0270078	54.0203	49.4879	63.9769	75.7365
ENSMUSG00000039904.9	Gpr37	51.6139	1.83786	0.600943	3.05829	0.00222601	0.0270078	0.388332	0.287863	1.30367	0.899165
ENSMUSG00000020357.3	Flt4	660.715	-0.699917	0.228927	-3.05738	0.00223284	0.0270314	8.1421	8.80816	5.42903	4.2274
ENSMUSG00000027800.14	Tm4sf1	194.449	-1.00439	0.328527	-3.05726	0.00223374	0.0270314	7.54494	5.88332	2.82462	3.28121
ENSMUSG00000030641.9	Ddias	876.311	0.747789	0.24483	3.05432	0.00225575	0.0272792	14.6495	10.6834	17.4889	21.2797
ENSMUSG00000020328.10	Nudcd2	2724.86	0.496742	0.16267	3.05368	0.00226056	0.0273188	101.742	107.526	134.112	138.045
ENSMUSG00000029999.14	Tgfa	330.085	-0.861042	0.282029	-3.05303	0.00226544	0.0273592	6.99936	5.60515	3.63707	2.73131
ENSMUSG00000021288.18	Klc1	2980.45	-0.454418	0.148907	-3.05169	0.00227555	0.0274626	123.91	122.3	86.0964	79.4681
ENSMUSG00000027860.15	Vangl1	604.427	0.690373	0.226356	3.04995	0.00228881	0.0275852	10.9554	10.364	14.5225	17.0827
ENSMUSG00000076437.10	2700094K13Rik	2473.89	0.639007	0.209511	3.05	0.00228841	0.0275852	176.559	166.42	289.513	203.511
ENSMUSG00000022129.3	Dct	162.452	-6.20309	2.0345	-3.04895	0.00229646	0.0276212	10.5957	7.74944	0	0.223324
ENSMUSG00000029121.15	Crmp1	2039.75	-0.651485	0.213652	-3.04928	0.00229389	0.0276212	66.4066	57.289	42.5024	30.0728
ENSMUSG00000051397.5	Tacstd2	150.957	-1.31749	0.432084	-3.04914	0.00229497	0.0276212	10.0696	6.07159	2.39292	3.45393
ENSMUSG00000032536.9	Trak1	843.633	-0.601989	0.197583	-3.04676	0.00231323	0.0277932	14.5004	12.4114	8.75209	7.54069
ENSMUSG00000040612.13	Ildr2	227.473	-1.14254	0.375014	-3.04667	0.00231389	0.0277932	2.43825	2.52323	1.34461	0.737546
ENSMUSG00000021458.16	2010111I01Rik	1078.87	0.591664	0.194228	3.04623	0.00231727	0.0277963	17.1062	18.4109	23.7522	25.6057
ENSMUSG00000026229.17	Psmd1	9988.63	0.441391	0.144889	3.04642	0.00231585	0.0277963	179.001	178.257	217.954	228.359
ENSMUSG00000041272.11	Tox	513.884	-0.683682	0.224509	-3.04523	0.00232505	0.027852	11.8767	9.68408	6.18589	6.10225
ENSMUSG00000068617.4	Efcab1	317.111	0.878011	0.288311	3.04536	0.00232405	0.027852	5.74678	5.78017	8.58278	10.9061
ENSMUSG00000051220.2	Ercc6l	2663.24	0.673613	0.221218	3.04501	0.00232671	0.0278532	22.6298	27.0824	32.4067	40.6666
ENSMUSG00000090555.1	Gm8893	29.2763	3.2759	1.07599	3.04454	0.00233036	0.0278781	0.067298	0.438328	4.01963	1.12466
ENSMUSG00000034591.5	Slc41a2	20.9573	-3.23886	1.06404	-3.04392	0.00233519	0.027917	1.01128	0.28278	0.055544	0.063747
ENSMUSG00000043501.4	Lgals2	42.304	4.07705	1.33962	3.04343	0.00233896	0.0279434	1.02574	0.182051	15.5081	0.765675
ENSMUSG00000103585.1	Pcdhgb4	124.368	-1.12303	0.369065	-3.0429	0.0023431	0.027974	2.41556	2.29372	1.07032	0.924829
ENSMUSG00000058927.5	Gm10053	1152.42	0.585858	0.192575	3.04224	0.00234823	0.0280165	58.9578	65.7741	85.0705	87.819
ENSMUSG00000030341.17	Tnfrsf1a	896.387	-0.569863	0.187373	-3.04133	0.00235535	0.0280825	35.4597	32.9733	22.7185	19.7481
ENSMUSG00000028127.10	Abcd3	2518.38	0.497677	0.163668	3.04077	0.00235973	0.0281159	38.8049	40.3641	50.3007	52.6674
ENSMUSG00000026273.13	Mterf4	702.465	0.761221	0.25049	3.03893	0.00237423	0.0282697	16.3469	21.8313	29.8844	30.1474
ENSMUSG00000000787.12	Ddx3x	27978.4	0.749266	0.246713	3.03699	0.0023895	0.0283376	357.051	266.337	387.485	569.234
ENSMUSG00000027577.14	Chrna4	247.015	-0.983526	0.323834	-3.03713	0.00238843	0.0283376	5.42165	4.15228	2.60862	1.8345
ENSMUSG00000030615.11	Tmem126a	833.561	0.59235	0.195019	3.03739	0.00238635	0.0283376	54.5173	55.3864	74.1332	78.5033
ENSMUSG00000030852.15	Tacc2	1978.06	-0.556919	0.183338	-3.03766	0.00238422	0.0283376	26.6498	22.2359	16.7629	13.7886
ENSMUSG00000034684.12	Sema3f	1945.04	-0.818538	0.26952	-3.03702	0.0023893	0.0283376	102.273	60.7614	47.6924	36.9016
ENSMUSG00000054889.9	Dsp	2118.76	0.741547	0.244098	3.0379	0.0023823	0.0283376	10.4561	13.4801	16.1326	20.7963
ENSMUSG00000024589.15	Nedd4l	848.933	-0.63729	0.210013	-3.03453	0.00240909	0.0285319	9.20219	7.16382	4.75604	4.87286
ENSMUSG00000031871.8	Cdh5	4023.73	-0.481856	0.158786	-3.03462	0.00240839	0.0285319	72.8337	78.5465	52.2361	47.7887
ENSMUSG00000024640.9	Psat1	3785.8	0.460382	0.151736	3.03411	0.00241249	0.0285531	101.832	105.069	137.265	125.266
ENSMUSG00000026435.15	Slc45a3	150.671	-1.16815	0.385033	-3.03389	0.0024142	0.0285544	4.20289	3.8725	2.04136	1.2842
ENSMUSG00000034485.9	Uaca	2565.88	0.563938	0.1859	3.03355	0.00241693	0.0285677	27.6659	32.3884	43.6518	38.491
ENSMUSG00000055210.4	Foxd2	158.937	1.2121	0.399613	3.03318	0.00241991	0.0285839	1.79118	2.87286	5.37035	4.85792
ENSMUSG00000051390.9	Zbtb22	985.906	-0.560464	0.184793	-3.03293	0.00242196	0.0285891	31.3286	26.7872	18.7387	17.4419
ENSMUSG00000035325.16	Sec31a	4501.36	-0.471832	0.155623	-3.03188	0.00243034	0.0286689	145.001	127.608	87.4766	92.99
ENSMUSG00000028901.13	Gmeb1	1633.02	-0.806394	0.266569	-3.02509	0.00248561	0.0293015	49.8358	28.8313	21.0473	19.9852
ENSMUSG00000033166.10	Dis3	3198	0.441196	0.145914	3.02367	0.00249729	0.0294197	47.9038	46.0405	60.787	56.6514
ENSMUSG00000020273.13	Papolg	1555.02	0.616826	0.204044	3.02301	0.00250277	0.0294566	23.1558	21.4536	28.06	34.6927
ENSMUSG00000044864.16	Ankrd50	2742.6	-0.730068	0.241513	-3.02289	0.00250373	0.0294566	48.9831	30.1591	22.081	21.4969
ENSMUSG00000033377.14	Palmd	125.864	-1.18315	0.391512	-3.02199	0.00251116	0.0295049	4.73563	4.28212	2.1448	1.49705
ENSMUSG00000093738.2	AI606473	20.1915	-2.81363	0.931008	-3.02214	0.00250996	0.0295049	1.21954	1.51068	0.150723	0.204191
ENSMUSG00000061603.7	Akap6	247.93	-0.928236	0.307227	-3.02134	0.0025166	0.0295492	1.80418	2.2608	0.977283	1.00455
ENSMUSG00000046402.10	Rbp1	6004.96	0.541802	0.179339	3.0211	0.0025186	0.0295532	108.187	128.736	167.2	151.582
ENSMUSG00000038084.16	Opa1	4200.35	0.578108	0.191416	3.02016	0.0025264	0.0296252	48.4617	46.617	57.9451	72.3479
ENSMUSG00000061315.13	Naca	18398.8	0.427328	0.141513	3.0197	0.00253024	0.0296506	863.913	865.607	1050.73	1089.48
ENSMUSG00000031647.10	Mfap3l	130.689	1.11936	0.370757	3.01912	0.00253512	0.0296883	0.82499	0.84182	1.59123	1.76511
ENSMUSG00000010609.15	Psen2	217.404	-1.08181	0.358397	-3.01846	0.0025406	0.0297329	16.4462	10.409	6.58023	4.96729
ENSMUSG00000021752.12	Kctd6	303.437	-0.803882	0.266397	-3.01761	0.00254774	0.0297968	11.6472	10.151	6.27492	5.19229
ENSMUSG00000029581.14	Fscn1	6241	-0.712895	0.236309	-3.01679	0.00255469	0.0298585	205.052	177.607	132.784	82.774
ENSMUSG00000001674.11	Ddx18	3529.11	0.479212	0.15892	3.01542	0.00256621	0.0299734	83.2638	89.738	112.26	110.2
ENSMUSG00000001785.11	Pwp1	3740.81	0.444129	0.147364	3.01383	0.00257973	0.030109	80.9657	81.3742	102.102	101.31
ENSMUSG00000029545.13	Acads	768.987	-0.759652	0.25207	-3.01366	0.00258121	0.030109	28.5009	37.048	19.9753	15.9546
ENSMUSG00000040797.16	Iqsec3	22.9988	-2.59491	0.861347	-3.01262	0.00259004	0.0301922	0.366152	0.313104	0.063236	0.040499
ENSMUSG00000048012.18	Zfp473	236.638	-1.04794	0.348028	-3.01107	0.0026033	0.0303269	4.00887	4.06948	2.25538	1.37968
ENSMUSG00000010760.4	Phlda2	63.9646	3.14531	1.04473	3.01064	0.00260699	0.03035	0.752832	1.3998	16.9924	1.39985
ENSMUSG00000031578.4	Mak16	2469.11	0.528007	0.175584	3.00715	0.00263709	0.0306657	66.7066	73.2952	90.1795	95.9888
ENSMUSG00000038323.3	1700066M21Rik	560.678	0.693964	0.230775	3.0071	0.00263756	0.0306657	9.34671	10.0536	13.5933	15.3741
ENSMUSG00000003779.15	Kif20a	7618.32	0.451111	0.150092	3.00556	0.00265091	0.0307417	112.379	119.863	147.384	145.281
ENSMUSG00000018846.8	Pank3	4674.94	0.553976	0.184321	3.00549	0.00265152	0.0307417	32.7784	33.3638	40.4004	48.8396
ENSMUSG00000021806.3	Nid2	2565.7	-0.764684	0.254441	-3.00535	0.00265274	0.0307417	43.4294	41.8145	29.1003	17.3184
ENSMUSG00000074071.9	Fam169b	38.1337	-2.00314	0.666383	-3.00598	0.00264726	0.0307417	1.60371	1.18731	0.378219	0.261035
ENSMUSG00000085893.1	Gm12091	305.475	-0.77797	0.258819	-3.00585	0.0026484	0.0307417	32.1382	27.9057	15.8111	16.283
ENSMUSG00000030220.13	Arhgdib	532.808	-0.635828	0.211738	-3.0029	0.00267418	0.0309436	35.6007	35.4488	22.0449	20.1295
ENSMUSG00000049807.16	Arhgap23	987.751	-0.588815	0.196091	-3.00277	0.00267538	0.0309436	23.12	20.8929	14.8787	12.0814
ENSMUSG00000074656.12	Eif2s2	5893.23	0.499413	0.166298	3.00312	0.00267223	0.0309436	130.873	116.616	150.244	170.785
ENSMUSG00000042719.17	Naa25	1868.79	0.577087	0.192298	3.00101	0.00269085	0.0311022	22.8198	25.3435	31.1366	35.1193
ENSMUSG00000046470.5	Sox18	520.142	-0.873893	0.291268	-3.0003	0.00269715	0.0311547	23.6157	29.6805	16.1146	10.897
ENSMUSG00000042595.7	Fam199x	2107.16	0.761321	0.253872	2.99884	0.00271008	0.0312838	14.2482	10.1634	15.8686	21.8556
ENSMUSG00000031333.7	Abcb7	1959.3	0.701285	0.233877	2.99852	0.00271298	0.031297	19.556	14.609	22.0738	28.6321
ENSMUSG00000025133.9	Ints4	3495.42	0.558851	0.186392	2.99825	0.00271531	0.0313016	109.152	86.4126	123.994	139.666
ENSMUSG00000025318.13	Jph3	82.8173	-1.32686	0.442571	-2.99806	0.00271701	0.0313016	2.29638	2.00389	0.788305	0.787695
ENSMUSG00000058407.12	Txndc9	2409.29	0.556882	0.185759	2.99788	0.00271866	0.0313016	41.2607	48.739	63.5184	58.8753
ENSMUSG00000078578.9	Ube2d3	11337.1	0.599133	0.199895	2.99723	0.00272442	0.0313476	216.697	190.298	245.17	319.67
ENSMUSG00000000435.1	Myf5	63.0544	-1.67638	0.559398	-2.99676	0.00272869	0.0313764	3.22831	2.71776	0.631898	1.06712
ENSMUSG00000033306.14	Lpp	4079.3	0.593658	0.198126	2.99637	0.00273218	0.0313962	14.9822	11.8837	16.8285	20.273
ENSMUSG00000075415.13	Fnbp1	1527.39	-0.736513	0.245846	-2.99583	0.002737	0.031411	31.7386	20.9622	16.2404	12.7319
ENSMUSG00000103189.1	Gm37092	33.3311	-2.27632	0.759807	-2.99591	0.00273623	0.031411	3.17159	1.58565	0.473337	0.39694
ENSMUSG00000059796.16	Eif4a1	27519.2	0.517781	0.172884	2.99496	0.00274485	0.0314808	919.338	711.663	1036.09	1104.15
ENSMUSG00000050397.3	Foxl2	33.0361	-2.39667	0.800928	-2.99236	0.00276827	0.0317289	4.08891	1.69687	0.493527	0.48771
ENSMUSG00000032175.10	Tyk2	641.656	-0.657738	0.219821	-2.99216	0.00277012	0.0317297	11.2856	10.6429	7.17612	5.63543
ENSMUSG00000022892.10	App	6861.71	-0.432386	0.144568	-2.99088	0.00278173	0.0318216	174.299	151.014	113.473	108.043
ENSMUSG00000036913.14	Trim67	51.2077	-1.79572	0.600378	-2.99098	0.00278087	0.0318216	0.46458	0.691483	0.173	0.136469
ENSMUSG00000103979.1	Gm20305	56.8265	2.12487	0.710558	2.99043	0.00278589	0.0318487	4.58491	10.2364	42.4567	20.3546
ENSMUSG00000053613.6	Notumos	32.6942	-2.1832	0.730739	-2.98766	0.0028112	0.0321174	1.55245	1.07683	0.217923	0.31143
ENSMUSG00000039990.15	Edrf1	1419.38	0.54734	0.183221	2.98732	0.00281438	0.0321258	22.627	20.8379	32.2007	26.3134
ENSMUSG00000061306.15	Slc38a10	3127.1	-0.5105	0.170897	-2.98719	0.00281555	0.0321258	88.5745	80.9862	60.7528	48.9137
ENSMUSG00000039981.5	Zc3h12d	28.3942	2.35664	0.789066	2.98662	0.0028208	0.0321651	0.166712	0.12976	0.616227	0.749897
ENSMUSG00000002504.14	Slc9a3r2	876.029	-0.552053	0.184925	-2.98527	0.00283326	0.0322819	32.5003	31.8172	21.2331	19.1683
ENSMUSG00000027887.11	Sypl2	66.4435	-1.55032	0.519383	-2.98492	0.00283649	0.0322819	1.46399	1.7484	0.600331	0.419322
ENSMUSG00000048232.12	Fbxo10	865.717	-0.577423	0.193435	-2.9851	0.00283487	0.0322819	15.6182	13.5521	9.59874	8.36423
ENSMUSG00000028357.12	Kif12	27.461	2.50909	0.840956	2.98362	0.00284861	0.0323943	0.103304	0.21239	0.973396	0.817432
ENSMUSG00000030663.12	1110004F10Rik	5850.58	0.412993	0.138427	2.98347	0.00285001	0.0323943	227.286	219.701	282.762	265.239
ENSMUSG00000035762.10	Tmem161b	608.914	0.730474	0.244907	2.98266	0.00285757	0.0324387	12.4783	10.5173	15.5499	19.3857
ENSMUSG00000042271.13	Nxt2	463.541	0.816289	0.273666	2.98279	0.00285631	0.0324387	8.89757	8.65191	12.0848	16.285
ENSMUSG00000022257.3	Laptm4b	2837.8	-0.450289	0.151097	-2.98013	0.00288125	0.0326867	111.313	111.178	75.0628	74.8939
ENSMUSG00000070544.6	Top1	12798.9	0.521113	0.174904	2.97942	0.00288791	0.0327413	196.104	168.795	220.284	259.821
ENSMUSG00000023150.14	Ivns1abp	12872.8	0.534912	0.179591	2.9785	0.00289659	0.0328127	192.024	219.04	257.959	290.66
ENSMUSG00000028175.15	Depdc1a	1410.25	0.761333	0.255655	2.97798	0.00290159	0.0328127	34.2375	22.6047	39.238	48.5028
ENSMUSG00000040841.5	Six5	1367.68	-0.509643	0.171132	-2.97807	0.00290069	0.0328127	36.9974	32.0031	22.6884	21.8067
ENSMUSG00000060128.5	Gm2710	300.238	0.834736	0.280298	2.97803	0.00290111	0.0328127	24.7315	21.5049	34.5449	40.9253
ENSMUSG00000003228.8	Grk5	522.059	-0.646727	0.217216	-2.97735	0.00290753	0.032859	13.2739	12.6691	8.21508	7.04941
ENSMUSG00000071172.12	Srsf3	30563.4	0.471839	0.158513	2.97665	0.00291414	0.0329127	549.492	578.564	685.017	754.624
ENSMUSG00000034601.16	2700049A03Rik	1571.3	0.831506	0.279563	2.97431	0.00293651	0.0331444	14.4317	20.2355	23.9137	33.0037
ENSMUSG00000031565.17	Fgfr1	4265.69	-0.628108	0.211209	-2.97387	0.00294071	0.0331706	104.839	89.0452	68.2764	47.3775
ENSMUSG00000030022.14	Adamts9	2364.09	-0.507701	0.17076	-2.97319	0.0029472	0.0332205	28.7077	29.6006	18.0319	19.7244
ENSMUSG00000061242.6	Gm9104	884.051	0.65256	0.219494	2.97302	0.00294887	0.0332205	85.2296	97.5161	147.315	118.866
ENSMUSG00000037608.15	Bclaf1	12552.4	0.627777	0.211181	2.9727	0.00295194	0.0332341	161.624	121.687	177.034	223.289
ENSMUSG00000030397.9	Mark4	970.538	-0.6033	0.202974	-2.9723	0.00295581	0.0332566	37.4682	29.521	21.4261	19.0227
ENSMUSG00000045302.13	Preb	1301.63	-0.510484	0.1718	-2.97139	0.00296457	0.033334	47.3564	43.8915	31.3282	27.6557
ENSMUSG00000040034.15	Nup43	1984.3	0.520205	0.175117	2.97062	0.00297197	0.0333961	78.7982	85.053	105.438	111.238
ENSMUSG00000036820.11	Amdhd2	470.982	-0.672235	0.226333	-2.97011	0.00297693	0.0334308	30.2125	27.8395	18.2019	15.3776
ENSMUSG00000020130.8	Tbc1d15	2424.97	0.524852	0.176788	2.96882	0.0029895	0.0335508	36.483	31.5702	42.2745	47.5149
ENSMUSG00000036040.14	Adamtsl2	59.9758	-1.83462	0.618096	-2.96818	0.00299569	0.0335989	2.97836	2.26504	0.452044	0.932659
ENSMUSG00000029110.13	Rnf4	7811.83	0.476007	0.160391	2.96779	0.0029995	0.0336205	178.053	155.195	201.982	223.262
ENSMUSG00000016018.3	Skiv2l2	5800.38	0.495666	0.167106	2.96617	0.00301534	0.0337767	94.0925	93.3052	113.205	129.678
ENSMUSG00000053656.6	Dancr	197.93	1.52452	0.514031	2.96582	0.00301879	0.0337941	5.91535	16.2286	26.7283	33.6009
ENSMUSG00000022337.6	Emc2	1509.18	0.602891	0.203299	2.96553	0.00302161	0.0337947	68.297	56.1487	79.3138	93.5974
ENSMUSG00000030283.7	St8sia1	307.394	-0.836264	0.282005	-2.96543	0.00302265	0.0337947	2.66183	3.01942	1.36053	1.57877
ENSMUSG00000039942.15	Ptger4	46.641	-1.81023	0.610501	-2.96516	0.00302523	0.0338023	1.61367	1.12417	0.41708	0.305507
ENSMUSG00000035041.8	Creb3l3	71.4412	3.21064	1.08288	2.96491	0.00302775	0.0338092	0.59159	0.274354	6.9261	0.416131
ENSMUSG00000036745.15	Ttll7	354.718	-0.95973	0.323879	-2.96323	0.00304425	0.0339509	5.08475	7.79599	3.2048	2.95232
ENSMUSG00000051251.3	Nhlh1	146.661	-4.32834	1.46066	-2.96328	0.00304376	0.0339509	7.591	7.0295	0.637664	0.040985
ENSMUSG00000038729.20	Akap2	1808.72	-0.942586	0.31818	-2.96243	0.00305219	0.034018	29.7158	15.1969	9.27481	11.9677
ENSMUSG00000028179.12	Cth	624.204	0.788451	0.266185	2.96204	0.00305611	0.0340289	13.6321	19.0436	25.8493	26.64
ENSMUSG00000068923.14	Syt11	1506.25	-0.853188	0.28805	-2.96195	0.00305699	0.0340289	31.8185	24.8665	10.8867	17.7354
ENSMUSG00000006906.10	Stambp	441.934	-0.78039	0.263516	-2.96146	0.00306186	0.0340618	17.707	12.4369	7.98637	7.99537
ENSMUSG00000038604.8	Fam65a	1100.49	-0.602972	0.203645	-2.9609	0.00306745	0.0341026	22.0372	19.6537	14.2564	11.0196
ENSMUSG00000024462.17	Gabbr1	1200.57	-0.52196	0.176401	-2.95895	0.00308691	0.0342972	36.7729	37.0302	25.1496	22.278
ENSMUSG00000030057.15	Cnbp	20390.5	0.398173	0.134574	2.95876	0.00308881	0.0342972	700.688	702.552	870.527	832.652
ENSMUSG00000004633.17	Chn2	379.445	0.902929	0.305244	2.95806	0.00309583	0.0343323	5.32025	7.5856	10.586	11.9234
ENSMUSG00000027379.13	Bub1	5317.65	0.65584	0.2217	2.95823	0.00309414	0.0343323	98.3625	73.9904	107.996	140.167
ENSMUSG00000005360.14	Slc1a3	509.932	0.652061	0.220552	2.95649	0.00311162	0.0344858	7.38774	6.81282	9.92396	10.5664
ENSMUSG00000050310.8	Rictor	2194.65	0.717857	0.242835	2.95615	0.00311505	0.0345023	13.2856	9.79385	14.7564	19.8815
ENSMUSG00000042066.15	Tmcc2	940.476	-0.637714	0.21579	-2.95526	0.00312411	0.0345811	25.0989	20.6748	15.2113	11.8354
ENSMUSG00000032878.16	Ccdc85a	130.68	-1.19209	0.403471	-2.95458	0.00313096	0.0345923	2.2388	2.55763	1.18059	0.77916
ENSMUSG00000039316.14	Rftn1	334.925	-0.748	0.253157	-2.95469	0.00312988	0.0345923	7.85471	7.82326	4.12683	4.49045
ENSMUSG00000064289.15	Tank	907.849	0.668689	0.226299	2.95489	0.00312779	0.0345923	22.9554	16.8012	27.5738	30.0767
ENSMUSG00000029720.9	Gm20605	400.348	-1.59494	0.540031	-2.95342	0.00314271	0.0347006	3.95654	13.1455	2.08991	3.1842
ENSMUSG00000049288.4	Lix1l	1672.39	-0.535173	0.181221	-2.95315	0.00314552	0.03471	44.1553	36.954	27.8319	23.6112
ENSMUSG00000002477.4	Snrpd1	5616.56	0.463937	0.15713	2.95256	0.00315148	0.0347112	349.325	376.426	456.454	466.074
ENSMUSG00000032998.16	Foxj3	1213.69	0.63345	0.214531	2.95272	0.00314991	0.0347112	18.352	16.3236	28.5629	20.9994
ENSMUSG00000040003.17	Magi2	120.596	-1.19271	0.403913	-2.95288	0.0031482	0.0347112	2.04978	1.53822	0.635462	0.792493
ENSMUSG00000028832.11	Stmn1	8086.88	-0.399154	0.135211	-2.95207	0.00315648	0.0347232	661.977	618.125	458.142	435.061
ENSMUSG00000061882.12	Ccdc62	73.902	-1.69365	0.573694	-2.95218	0.0031554	0.0347232	3.65957	3.04447	0.620527	1.28183
ENSMUSG00000036777.7	Anln	4747.2	0.534017	0.180917	2.95172	0.00316005	0.034741	45.5382	46.5801	55.9498	66.6707
ENSMUSG00000030814.17	Bcl7c	1988.84	-0.538776	0.182553	-2.95135	0.00316391	0.0347619	63.2236	49.6581	37.3569	33.9149
ENSMUSG00000042182.16	Bend6	58.9742	-1.71235	0.580401	-2.95028	0.00317483	0.0348604	2.30817	2.63062	0.908818	0.497385
ENSMUSG00000001995.8	Sipa1l2	1308.59	-0.554083	0.187836	-2.94982	0.0031796	0.0348913	17.1851	14.4053	10.7173	9.06218
ENSMUSG00000012848.14	Rps5	35285.5	0.486392	0.164909	2.94945	0.00318341	0.0349114	2585.54	2827.87	3322.45	3659.9
ENSMUSG00000041237.12	Pklr	328.597	1.06659	0.361671	2.94906	0.00318745	0.0349342	3.56107	6.19541	8.90904	10.1993
ENSMUSG00000078695.8	Cisd3	176.423	-0.985157	0.334084	-2.94883	0.0031898	0.0349385	18.9996	21.8252	9.08508	10.0069
ENSMUSG00000027582.16	Zgpat	821.222	-0.645562	0.219035	-2.9473	0.00320562	0.0350901	23.3161	17.5105	12.57	11.2985
ENSMUSG00000043192.3	Gm1840	224.424	-0.869198	0.295035	-2.94608	0.0032183	0.0352073	13.8985	12.6114	7.35775	5.98657
ENSMUSG00000038910.6	Plcl2	1011.98	-0.547516	0.185873	-2.94564	0.00322284	0.0352116	19.6115	18.6364	13.0478	11.0698
ENSMUSG00000051515.8	Fam181b	170.167	-0.950665	0.322735	-2.94565	0.00322279	0.0352116	7.95184	7.78241	3.64912	3.85843
ENSMUSG00000054321.6	Taf4b	351.207	0.721505	0.244954	2.94547	0.00322465	0.0352116	3.50282	3.15671	5.31267	4.76459
ENSMUSG00000070462.4	Mesdc1	1817.82	-0.531558	0.180496	-2.94499	0.00322962	0.0352443	33.3413	29.2236	21.9446	17.8888
ENSMUSG00000030282.14	Cmas	2330.29	-0.514243	0.174677	-2.94397	0.00324035	0.0353397	95.2346	106.987	65.5701	65.0825
ENSMUSG00000036306.11	Lzts1	274.824	-0.811301	0.27571	-2.94259	0.00325483	0.0354759	4.7925	4.76922	2.77231	2.25453
ENSMUSG00000000305.12	Cdh4	129.93	-1.05893	0.359951	-2.94188	0.00326222	0.0355346	1.97269	1.83895	0.89273	0.787913
ENSMUSG00000097277.7	2900076A07Rik	323.64	0.746411	0.253913	2.93963	0.00328608	0.0357726	21.4892	20.801	31.8025	33.5413
ENSMUSG00000028693.15	Nasp	27219.6	0.532092	0.181026	2.93931	0.00328944	0.0357872	643.868	634.921	759.548	938.363
ENSMUSG00000045455.7	Gm9797	866.491	0.630309	0.214468	2.93894	0.00329336	0.035808	34.3705	39.5126	50.6367	55.0307
ENSMUSG00000057672.15	Pkn1	1219.95	-0.578456	0.196894	-2.93791	0.00330428	0.0359048	39.7295	36.5462	26.4535	20.6363
ENSMUSG00000020190.13	Mknk2	4960.32	-0.433614	0.147613	-2.93752	0.00330853	0.0359289	133.096	117.52	89.6621	81.0086
ENSMUSG00000021835.14	Bmp4	1491.97	-0.512256	0.174425	-2.93683	0.00331586	0.0359295	63.8907	54.0627	37.6821	38.1901
ENSMUSG00000022956.10	Atp5o	6177.7	0.506889	0.172584	2.93705	0.00331353	0.0359295	595.689	463.786	679.952	699.603
ENSMUSG00000035614.10	Fam179b	1759.6	0.49595	0.168877	2.93675	0.00331666	0.0359295	15.452	13.8427	18.3967	19.5201
ENSMUSG00000095115.1	Itpripl2	738.534	-0.586137	0.199567	-2.93704	0.00331362	0.0359295	8.56796	8.08278	4.89531	5.29787
ENSMUSG00000035944.17	Ttc38	232.922	-0.959602	0.326788	-2.93646	0.00331977	0.0359412	6.04635	4.57377	2.90192	2.10368
ENSMUSG00000042363.14	Lgalsl	1392.96	0.567262	0.193208	2.93602	0.00332454	0.035971	20.8474	23.459	29.2346	31.3631
ENSMUSG00000054871.4	Tmem158	239.723	1.14346	0.389635	2.9347	0.00333873	0.0361025	5.17424	5.87187	14.8098	7.95613
ENSMUSG00000057886.5	Cbx3-ps6	1008.08	0.606547	0.206718	2.93417	0.00334439	0.0361199	97.3042	89.5269	119.313	141.565
ENSMUSG00000067071.8	Hes6	1368.38	-0.568002	0.193572	-2.93432	0.00334278	0.0361199	85.3221	65.8581	47.657	45.785
ENSMUSG00000022673.4	Mcm4	10419.1	0.447419	0.152496	2.93397	0.00334661	0.0361219	155.498	160.79	192.038	204.917
ENSMUSG00000000317.11	Bcl6b	358.6	-0.852651	0.290801	-2.93208	0.00336702	0.036275	8.80814	8.9137	5.4334	3.64008
ENSMUSG00000024391.7	Apom	224.23	5.64574	1.92543	2.9322	0.0033657	0.036275	0.242313	0.853393	50.8071	1.72598
ENSMUSG00000026914.15	Psmd14	4968.45	0.431427	0.147173	2.93144	0.003374	0.036275	183.085	176.15	217.953	227.56
ENSMUSG00000031824.14	6430548M08Rik	175.857	-1.23958	0.42272	-2.93239	0.00336361	0.036275	3.49722	2.92741	1.6685	0.840777
ENSMUSG00000040703.11	Cyp2s1	201.821	1.00518	0.3429	2.93141	0.00337425	0.036275	2.93196	3.31769	6.85139	4.8406
ENSMUSG00000044098.14	Rsbn1	1423.63	0.739084	0.252108	2.93161	0.00337208	0.036275	11.929	11.8802	14.7942	21.6427
ENSMUSG00000073791.11	Efcab7	388.397	0.778555	0.265598	2.93134	0.00337508	0.036275	15.2779	13.4078	25.9614	19.3664
ENSMUSG00000024319.17	Vps52	1544.66	-0.530458	0.180989	-2.93088	0.00338004	0.0363063	45.7736	45.1841	31.9754	26.1252
ENSMUSG00000026064.15	Ptp4a1	2650.03	0.563119	0.192216	2.92961	0.00339389	0.0364316	39.0545	38.6722	47.4227	58.0395
ENSMUSG00000039242.9	B3galnt2	2204.01	0.446858	0.152541	2.92943	0.0033958	0.0364316	33.204	32.1162	41.5624	40.3822
ENSMUSG00000004891.16	Nes	6803.41	-0.438508	0.14971	-2.92905	0.00340003	0.036455	84.7429	85.1639	61.9515	53.6565
ENSMUSG00000032333.5	Stoml1	353.905	-0.776459	0.265144	-2.92845	0.00340661	0.0365035	16.1154	12.9771	7.27508	8.26293
ENSMUSG00000061981.14	Flot2	1345.21	-0.495447	0.169311	-2.92625	0.00343079	0.0367405	40.9862	36.5333	25.2881	25.2096
ENSMUSG00000041238.15	Rbbp8	2077.26	0.741965	0.253656	2.92508	0.00344364	0.0368457	32.0888	23.5866	35.3473	49.6124
ENSMUSG00000065228.1	Gm25789	25.6383	5.43494	1.85811	2.92498	0.00344476	0.0368457	1.41264	0.847347	0.855462	75.5895
ENSMUSG00000027763.13	Mbnl1	1299.99	0.872958	0.29853	2.92419	0.00345351	0.0369115	18.3806	12.6024	20.1426	31.4826
ENSMUSG00000028369.15	Svep1	987.291	0.774946	0.265042	2.92386	0.00345715	0.0369115	3.42464	4.90514	7.33226	5.91901
ENSMUSG00000082585.3	Gm15387	1924.72	0.56094	0.19184	2.92399	0.00345573	0.0369115	154.048	154.954	191.196	227.936
ENSMUSG00000022322.7	Shcbp1	2764.62	0.56054	0.19186	2.92162	0.00348222	0.0371569	73.8532	61.5623	83.5705	99.3158
ENSMUSG00000030983.4	Bccip	3304.07	0.441402	0.151124	2.9208	0.00349137	0.0372322	155.644	158.774	197.19	196.175
ENSMUSG00000026452.15	Syt2	184.597	-1.07057	0.366695	-2.91951	0.00350579	0.0372965	2.34155	2.75529	1.359	0.894329
ENSMUSG00000032349.13	Elovl5	4495.69	0.551267	0.188815	2.91962	0.00350459	0.0372965	78.3795	90.5552	106.989	121.194
ENSMUSG00000039200.15	Atf7ip2	199.006	1.01136	0.346384	2.91976	0.00350303	0.0372965	3.87591	2.7677	5.46584	6.65818
ENSMUSG00000047497.9	Adamts12	423.279	0.977928	0.334905	2.92002	0.00350009	0.0372965	2.36466	3.47983	4.49815	6.17263
ENSMUSG00000020453.17	Patz1	2087.51	-0.599138	0.205254	-2.91901	0.00351141	0.0373117	76.7584	55.2987	42.4347	37.4211
ENSMUSG00000033147.16	Slc22a15	198.664	-0.956595	0.327694	-2.91917	0.00350965	0.0373117	4.99011	4.26878	2.53448	1.85522
ENSMUSG00000033831.5	Fgb	358.981	11.7288	4.01954	2.91794	0.00352357	0.0374185	0	0	22.5537	0.27831
ENSMUSG00000033883.11	D3Ertd254e	1074.02	0.759363	0.26034	2.91681	0.00353634	0.0374478	9.0213	6.74684	10.25	14.0819
ENSMUSG00000033991.8	Ttc37	1690.58	0.688541	0.236074	2.91663	0.0035383	0.0374478	14.6604	16.2722	19.4586	26.3874
ENSMUSG00000035960.13	Apex1	6333.15	0.540367	0.185238	2.91714	0.00353255	0.0374478	252.033	308.636	380.524	372.724
ENSMUSG00000042613.9	Pbxip1	1043.16	-0.632508	0.216803	-2.91743	0.00352931	0.0374478	20.9293	15.8071	11.8787	9.84983
ENSMUSG00000068922.14	Msto1	1003.39	-0.683193	0.234245	-2.91658	0.00353897	0.0374478	40.4849	29.0518	22.0464	17.6684
ENSMUSG00000079641.3	Rpl39	7511.32	0.428656	0.146956	2.9169	0.00353529	0.0374478	656.999	691.544	860.772	812.911
ENSMUSG00000066551.12	Hmgb1	7026.34	0.506491	0.173672	2.91636	0.00354141	0.0374513	160.97	167.026	198.034	230.488
ENSMUSG00000048490.13	Nrip1	2745.4	0.54622	0.187314	2.91606	0.00354485	0.0374654	18.8501	19.0064	23.1123	27.7049
ENSMUSG00000037601.11	Nme1	6497.04	0.453473	0.155595	2.91445	0.00356319	0.0376368	111.751	121.295	147.272	146.962
ENSMUSG00000019433.8	Gipc1	2269.45	-0.44593	0.153017	-2.91425	0.00356541	0.037638	107.218	101.739	73.7505	67.4564
ENSMUSG00000020814.13	Mxra7	484.616	-0.689097	0.236508	-2.91364	0.00357244	0.0376898	19.6994	22.4995	12.777	11.446
ENSMUSG00000037166.4	Ppp1r14a	288	-0.980748	0.336636	-2.91338	0.00357545	0.0376991	44.4582	48.1393	27.1464	16.3126
ENSMUSG00000040907.15	Atp1a3	39.0281	-2.03323	0.697952	-2.91314	0.00357819	0.0377057	1.31275	1.05252	0.185815	0.342963
ENSMUSG00000026775.9	Yme1l1	8566.71	0.603102	0.207045	2.9129	0.00358087	0.0377116	110.483	87.0283	120.772	153.701
ENSMUSG00000000552.9	Zfp385a	1182.33	-0.62826	0.215717	-2.91243	0.00358631	0.0377464	46.4115	34.68	26.3379	21.7913
ENSMUSG00000021843.16	Ktn1	5363.17	0.678802	0.233122	2.91178	0.00359371	0.0377802	91.9527	60.5468	101.829	121.048
ENSMUSG00000100862.1	Gm10925	128165	0.511525	0.175674	2.91178	0.00359377	0.0377802	10296.1	9797.32	11836.8	14454.8
ENSMUSG00000027602.9	Map1lc3a	714.66	-0.558269	0.191854	-2.90987	0.00361583	0.0379449	60.6896	57.9773	38.2428	35.9152
ENSMUSG00000030751.17	Psma1	6937.93	0.49008	0.16841	2.91004	0.00361387	0.0379449	319.015	314.735	378.966	438.971
ENSMUSG00000059714.13	Flot1	623.411	-0.676411	0.23245	-2.90992	0.00361523	0.0379449	35.9684	39.5705	24.4853	19.2437
ENSMUSG00000007880.16	Arid1a	8439.53	-0.531226	0.182592	-2.90937	0.00362161	0.0379615	99.7804	78.4319	52.9395	60.0086
ENSMUSG00000052299.8	Ltn1	3260.61	0.505629	0.173794	2.90936	0.00362168	0.0379615	23.5355	21.3951	27.2112	31.3335
ENSMUSG00000060073.9	Psma3	6153.49	0.6611	0.227292	2.90859	0.00363065	0.038033	163.844	165.006	293.113	188.095
ENSMUSG00000029913.14	Prdm5	685.682	0.598713	0.205857	2.90839	0.00363297	0.0380349	19.2832	17.316	24.4098	26.4313
ENSMUSG00000025223.14	Ldb1	5529.45	-0.476631	0.163966	-2.9069	0.00365033	0.0381942	231.181	206.205	159.475	129.999
ENSMUSG00000003534.17	Ddr1	1836.68	-0.658562	0.226631	-2.90588	0.00366228	0.0382741	50.1262	34.9808	22.8999	26.337
ENSMUSG00000043716.13	Rpl7	38862.7	0.90491	0.311395	2.90599	0.00366093	0.0382741	1550.93	2220.49	2369.42	4124.04
ENSMUSG00000031558.15	Slit2	3090.64	-0.514825	0.177391	-2.9022	0.00370552	0.0387033	38.9736	33.2852	25.7848	20.753
ENSMUSG00000022856.8	Tmem41a	477.142	-0.673452	0.232126	-2.90124	0.00371694	0.0387998	29.9376	25.8066	17.565	14.5766
ENSMUSG00000032231.14	Anxa2	3795.89	-0.557228	0.192118	-2.90044	0.00372636	0.0388753	136.995	141.631	77.9832	96.0575
ENSMUSG00000027358.6	Bmp2	180.776	1.10479	0.380973	2.89992	0.00373257	0.0388958	1.60009	2.49973	4.03183	4.23814
ENSMUSG00000029862.15	Clcn1	66.9911	-1.75863	0.606441	-2.89991	0.0037327	0.0388958	3.75603	1.80685	0.941574	0.56423
ENSMUSG00000022949.9	Clic6	275.103	0.859909	0.296781	2.89745	0.00376206	0.0391787	3.65101	3.09212	6.43124	4.78187
ENSMUSG00000005681.12	Apoa2	220.997	11.0289	3.80667	2.89726	0.00376434	0.0391795	0	0	101.307	2.01584
ENSMUSG00000039058.11	Ak5	109.585	1.1689	0.403479	2.89705	0.00376692	0.0391834	1.94448	1.59072	3.94419	3.35811
ENSMUSG00000021111.15	Papola	6708.56	0.513961	0.177431	2.89669	0.00377127	0.0392057	124.195	137.624	161.562	182.697
ENSMUSG00000040943.12	Tet2	1879.6	0.9354	0.322963	2.89631	0.00377582	0.0392085	19.8913	13.1726	20.8776	36.605
ENSMUSG00000094870.7	Zfp131	2359.35	0.511474	0.176596	2.8963	0.00377595	0.0392085	42.9465	40.5475	50.9198	58.4051
ENSMUSG00000018417.14	Myo1b	6215.26	0.478354	0.16519	2.89578	0.00378217	0.0392502	83.1472	77.0526	95.5812	109.323
ENSMUSG00000003226.6	Ranbp2	9999.67	0.803765	0.277687	2.8945	0.00379767	0.0393881	61.778	37.8986	65.1451	93.3191
ENSMUSG00000022641.15	Bbx	2159.77	0.773323	0.267245	2.89368	0.00380751	0.0394246	22.0416	15.4707	23.8904	34.5787
ENSMUSG00000025171.1	Ubtd1	345.478	-0.755185	0.260996	-2.89347	0.00381006	0.0394246	17.6236	18.9236	11.0549	9.01056
ENSMUSG00000074030.2	Exoc8	688.097	-0.680267	0.235061	-2.894	0.0038037	0.0394246	8.59608	6.21765	4.45066	4.00775
ENSMUSG00000075054.4	Yae1d1	1227.44	0.5979	0.206637	2.89348	0.00381003	0.0394246	17.2037	19.2978	23.7592	27.2172
ENSMUSG00000047139.8	Cd24a	26752.9	0.47903	0.165704	2.89088	0.00384169	0.0397287	810.786	778.309	936.875	1097.29
ENSMUSG00000040415.15	Dtx3	2363.7	-0.461576	0.159692	-2.8904	0.00384747	0.0397654	100.413	91.6366	68.6377	59.7213
ENSMUSG00000025982.13	Sf3b1	22138.5	0.553511	0.191525	2.89002	0.00385222	0.0397914	222.115	182.649	242.98	301.066
ENSMUSG00000038260.9	Trpm4	652.455	-0.624452	0.216092	-2.88975	0.00385545	0.0398016	13.4562	10.6603	7.1937	7.13021
ENSMUSG00000026087.11	Mrpl30	1786.58	0.540505	0.187109	2.88871	0.00386822	0.0399102	165.326	142.936	191.332	219.492
ENSMUSG00000000957.9	Mmp14	3048.58	-0.463409	0.160466	-2.8879	0.00387822	0.0399902	98.3018	81.9004	61.1479	58.826
ENSMUSG00000050855.16	Zfp940	549.017	0.684808	0.23723	2.88669	0.00389321	0.0401215	10.2042	11.3065	14.87	17.0103
ENSMUSG00000021796.14	Bmpr1a	9492.28	0.593318	0.205627	2.88541	0.00390909	0.0402611	88.8784	78.3075	99.2057	131.839
ENSMUSG00000049892.7	Rasd1	42.0496	-1.76326	0.611132	-2.88523	0.00391129	0.0402611	2.68097	2.51782	0.761229	0.662381
ENSMUSG00000004665.10	Cnn2	6887.8	-0.412299	0.142923	-2.88476	0.00391711	0.0402978	217.376	195.124	149.877	135.308
ENSMUSG00000049538.14	Adamts16	24.0837	-2.36181	0.819102	-2.88342	0.00393387	0.0404467	0.556811	0.467168	0.097573	0.088738
ENSMUSG00000038216.7	Pnmt	16.2129	-3.06563	1.06349	-2.88261	0.00394398	0.0405273	1.37222	1.83259	0.136944	0.217026
ENSMUSG00000015627.5	Gata5	647.348	0.904751	0.313978	2.88158	0.00395693	0.0406368	6.51666	11.026	15.6539	14.9653
ENSMUSG00000046410.9	Kcnk6	177.748	-0.929467	0.322627	-2.88094	0.00396496	0.0406958	3.50587	3.81574	1.89752	1.66262
ENSMUSG00000028218.19	Fam92a	1768.06	0.577792	0.200609	2.88019	0.00397433	0.0407214	63.4232	74.0125	89.4357	99.6855
ENSMUSG00000034245.10	Hdac11	314.861	-0.766392	0.266061	-2.88052	0.00397024	0.0407214	18.3431	17.6439	9.04683	10.4051
ENSMUSG00000035000.8	Dpp4	82.3817	2.49061	0.8647	2.88031	0.00397279	0.0407214	0.086545	0.568532	2.68622	0.908107
ENSMUSG00000020218.11	Wif1	26.9001	-3.66427	1.2728	-2.8789	0.00399066	0.0408652	2.03073	0.79326	0.206364	0
ENSMUSG00000071713.4	Csf2rb	153.809	1.10631	0.384459	2.87757	0.0040075	0.041014	1.06874	1.52365	2.50279	2.74691
ENSMUSG00000035898.13	Uba6	3785.23	0.588291	0.204509	2.8766	0.00401981	0.0411163	34.3251	26.9762	37.8609	46.4616
ENSMUSG00000044927.6	H1fx	2820.77	-0.549634	0.191085	-2.87638	0.00402264	0.0411216	199.149	156.933	123.627	99.9033
ENSMUSG00000020290.14	Xpo1	20108.1	0.52617	0.182958	2.87591	0.0040287	0.0411362	199.768	166.798	219.291	264.407
ENSMUSG00000036768.5	Kif15	4742.61	0.597327	0.207696	2.87597	0.00402789	0.0411362	57.0078	44.3646	62.4248	77.8473
ENSMUSG00000061136.13	Prpf40a	9319.52	0.562201	0.195552	2.87494	0.00404109	0.0412391	74.3292	60.6062	81.3897	101.022
ENSMUSG00000073530.11	Pappa2	128.94	1.0871	0.378246	2.87405	0.00405239	0.0413129	0.699186	0.535613	1.14006	1.23771
ENSMUSG00000102070.1	Gm28661	81081	0.443322	0.154252	2.87401	0.00405298	0.0413129	6587.93	6416.53	7652.4	8597.79
ENSMUSG00000022553.15	Maf1	1589.15	-0.47343	0.164782	-2.87308	0.00406496	0.0414114	79.5908	81.1411	53.9758	52.7111
ENSMUSG00000048007.4	Timm8a1	1070.58	0.603712	0.210169	2.87251	0.0040723	0.0414624	35.3123	41.4505	51.8366	55.9728
ENSMUSG00000045854.4	Lyrm2	476.882	-0.737174	0.256748	-2.87119	0.00408929	0.0416115	47.2635	59.9699	30.9125	28.768
ENSMUSG00000033860.13	Fgg	357.758	8.47213	2.95364	2.86837	0.00412598	0.0419608	0	0.136115	49.5523	0.403715
ENSMUSG00000003865.14	Gys1	1209.21	-0.539826	0.188224	-2.868	0.00413076	0.0419854	28.0308	28.0462	16.7388	18.7425
ENSMUSG00000013089.15	Etv5	1719.89	-0.455133	0.158746	-2.86706	0.00414304	0.0420861	32.6419	31.8432	21.9149	21.3872
ENSMUSG00000039456.9	Morc3	1894.65	0.523433	0.182588	2.86674	0.00414719	0.0421043	31.3797	28.0239	36.5038	41.798
ENSMUSG00000005442.13	Cic	2943.12	-0.494569	0.172554	-2.86618	0.00415463	0.0421557	52.2324	46.7905	35.8241	28.9089
ENSMUSG00000037572.16	Wdhd1	4050.58	0.481882	0.168154	2.86572	0.00416059	0.0421922	50.9262	52.9053	63.143	70.3191
ENSMUSG00000026792.16	Lrsam1	350.211	-0.703183	0.245406	-2.86539	0.00416498	0.0422126	8.8845	8.49089	5.26445	4.56637
ENSMUSG00000020439.17	Smtn	1273.6	-0.620955	0.216748	-2.86488	0.00417173	0.0422328	41.195	29.2026	21.4152	20.4234
ENSMUSG00000050812.18	AI314180	5392.66	0.456851	0.159459	2.86501	0.00417	0.0422328	67.9699	58.4817	86.2255	73.4295
ENSMUSG00000046694.6	Fam46b	37.6688	-1.92366	0.671659	-2.86405	0.00418262	0.042319	1.93836	1.42427	0.47995	0.33
ENSMUSG00000029007.8	Agtrap	463.086	-0.653776	0.228332	-2.86328	0.00419286	0.0423703	9.85535	9.01455	6.00028	5.04293
ENSMUSG00000034675.17	Dbn1	10225.1	-0.422654	0.14762	-2.86313	0.00419485	0.0423703	324.229	277.518	216.876	195.871
ENSMUSG00000035775.2	Krt20	162.159	1.06422	0.371697	2.86314	0.00419465	0.0423703	3.05994	3.88293	6.07349	7.44309
ENSMUSG00000049811.15	Fam161a	157.197	1.24866	0.43626	2.8622	0.0042071	0.04247	3.63613	3.97425	6.01254	10.5703
ENSMUSG00000073295.4	Nudt11	745	-0.558024	0.194993	-2.86176	0.004213	0.0425054	18.59	19.0373	12.3147	11.2534
ENSMUSG00000035293.13	G2e3	3710.3	0.663797	0.232121	2.8597	0.00424035	0.0427571	35.6238	25.2182	38.658	49.3256
ENSMUSG00000003949.16	Hlf	199.52	1.39884	0.489232	2.85926	0.00424635	0.0427933	1.06157	2.05747	5.14286	2.63272
ENSMUSG00000038415.9	Foxq1	101.155	1.18824	0.415653	2.85872	0.00425356	0.0428416	1.41546	1.55845	3.40621	2.90206
ENSMUSG00000096606.2	Gm4980	53.1561	-2.444	0.85502	-2.85841	0.00425774	0.0428595	1.83553	1.98052	0.570589	0.083097
ENSMUSG00000034040.16	Wbscr17	152.327	-1.05643	0.369663	-2.85782	0.00426564	0.0429147	2.1601	1.62156	0.754851	0.912951
ENSMUSG00000033416.14	Gucd1	1192.87	-0.551399	0.193181	-2.85431	0.00431309	0.043343	38.5169	31.4967	23.653	20.2116
ENSMUSG00000033799.9	Fam208b	4481.27	0.797074	0.279241	2.85443	0.00431145	0.043343	32.0366	18.9369	34.3144	46.3072
ENSMUSG00000035561.5	Aldh1b1	295.703	0.931553	0.326471	2.8534	0.00432539	0.0433931	4.68216	6.63088	11.3049	8.82954
ENSMUSG00000038298.14	Pdzk1	57.7222	3.6288	1.2717	2.8535	0.00432405	0.0433931	0.336346	0.161301	5.56699	0.142544
ENSMUSG00000063171.4	Rps4l	983.237	-0.591224	0.207197	-2.85344	0.00432488	0.0433931	97.5634	94.0247	66.395	50.9792
ENSMUSG00000031749.12	St3gal2	2067.57	-0.549672	0.192666	-2.85298	0.00433117	0.0434266	39.8244	34.5117	26.4586	20.3087
ENSMUSG00000038172.14	Ttc39b	212.585	1.19752	0.419805	2.85256	0.00433686	0.043459	0.790558	1.42784	2.80021	1.97575
ENSMUSG00000020253.14	Ppm1m	534.106	-0.687	0.240853	-2.85236	0.00433954	0.0434614	32.9075	27.44	15.7214	18.6261
ENSMUSG00000026098.13	Pms1	822.619	0.648662	0.227469	2.85165	0.00434932	0.0435349	17.7777	16.0161	21.5784	26.9962
ENSMUSG00000026785.14	Pkn3	391.732	-0.659483	0.231305	-2.85115	0.00435619	0.0435545	17.2267	16.2465	9.94956	9.55256
ENSMUSG00000078134.1	Gm12355	3380.27	0.452633	0.158749	2.85125	0.00435479	0.0435545	138.847	141.484	171.274	181.868
ENSMUSG00000038224.12	Serpinf2	189.494	8.24339	2.8917	2.85071	0.00436222	0.0435904	0	0.065921	20.7451	0.183361
ENSMUSG00000000142.15	Axin2	758.642	-1.03802	0.364163	-2.85043	0.00436604	0.043604	29.0533	18.5363	14.2956	7.03805
ENSMUSG00000028435.8	Aqp3	158.7	1.7763	0.623328	2.8497	0.00437603	0.0436792	3.08482	3.09228	15.6567	3.9507
ENSMUSG00000054702.14	Ap1s3	395.892	1.03271	0.362505	2.84883	0.00438807	0.0437749	5.83997	8.38029	10.4619	16.4906
ENSMUSG00000031109.16	Enox2	444.079	0.6366	0.223516	2.84813	0.00439775	0.0438222	7.20698	7.1497	10.5814	9.98072
ENSMUSG00000091898.8	Tnnc1	53.5615	-1.55963	0.54759	-2.84816	0.00439722	0.0438222	7.99486	6.41704	2.29999	2.18013
ENSMUSG00000022142.7	Nup155	6902.84	0.50966	0.179071	2.84613	0.00442535	0.0439945	54.8293	59.6299	69.4887	80.5013
ENSMUSG00000024845.17	Tmem134	944.712	-0.578334	0.203236	-2.84563	0.00443236	0.0439945	42.314	46.4618	29.8679	25.1
ENSMUSG00000027810.14	Eif2a	4180.11	0.473838	0.1665	2.84587	0.00442905	0.0439945	107.398	100.637	124.232	141.081
ENSMUSG00000038127.14	Ccdc50	7697.66	0.508604	0.178694	2.84623	0.00442403	0.0439945	62.1779	56.6641	70.2444	84.8571
ENSMUSG00000038524.13	Fchsd1	302.971	-0.82917	0.291371	-2.84575	0.0044307	0.0439945	9.12148	6.61412	3.83879	4.23165
ENSMUSG00000040147.14	Maob	297.255	1.35852	0.477279	2.84639	0.00442178	0.0439945	5.16679	3.82024	15.5713	5.65348
ENSMUSG00000041303.7	Gtf3c3	3151.54	0.530198	0.186268	2.84642	0.0044214	0.0439945	41.1151	35.4076	46.2901	54.9892
ENSMUSG00000036766.12	Dner	29.4688	-2.0797	0.730888	-2.84544	0.00443501	0.0439962	0.874089	0.824179	0.187389	0.179248
ENSMUSG00000022780.5	Mfi2	28.5825	4.9806	1.75071	2.8449	0.0044425	0.0440459	0	0.046461	1.60732	0.024434
ENSMUSG00000016262.14	Sertad4	1074.8	-0.590993	0.207778	-2.84435	0.00445027	0.0440984	28.8168	21.6648	16.0097	14.6931
ENSMUSG00000100615.1	Gm5511	899.464	0.604178	0.212428	2.84415	0.00445303	0.0441011	59.5308	55.239	72.9156	87.2118
ENSMUSG00000024697.3	Gna14	423.598	1.31797	0.46392	2.84094	0.00449812	0.0445229	2.45455	6.59981	9.26287	11.9284
ENSMUSG00000036144.6	Meox2	278.64	0.981821	0.34563	2.84067	0.00450184	0.0445349	4.23654	5.87434	7.96507	10.6222
ENSMUSG00000010064.15	Slc38a3	119.328	-1.08916	0.383474	-2.84025	0.00450785	0.0445696	5.24145	5.72219	2.60972	2.16127
ENSMUSG00000016346.17	Kcnq2	84.7355	-1.51737	0.534454	-2.83911	0.00452391	0.0447035	0.759135	1.32506	0.403903	0.28519
ENSMUSG00000041608.7	Entpd3	175.133	1.13639	0.400359	2.83844	0.00453349	0.0447732	2.00636	2.70701	3.9728	5.65467
ENSMUSG00000025921.7	Rdh10	2228.71	0.449136	0.158307	2.83711	0.00455233	0.0449344	34.8132	34.9169	46.2256	41.5478
ENSMUSG00000017146.12	Brca1	3220.62	0.566028	0.199546	2.83657	0.00456004	0.0449855	27.7726	28.1293	33.5663	42.4417
ENSMUSG00000021952.15	Xpo4	1501.37	0.656932	0.23162	2.83625	0.00456472	0.0450067	15.9944	16.3791	19.8993	26.9674
ENSMUSG00000028318.14	Polr1e	897.317	0.582728	0.205482	2.83591	0.00456955	0.0450293	26.2255	22.9279	31.4877	35.9482
ENSMUSG00000064128.6	Cenpj	1171.29	0.67111	0.236753	2.83464	0.00458772	0.0451833	14.1916	12.5565	16.5661	22.4082
ENSMUSG00000021953.14	Tdh	30.3854	4.18947	1.47854	2.83352	0.00460378	0.0453164	0	0.31125	5.14779	0.442209
ENSMUSG00000035954.9	Dock4	707.449	0.639444	0.225703	2.83312	0.00460955	0.045323	3.9721	4.82311	6.56413	6.13983
ENSMUSG00000037172.14	E330009J07Rik	1783.32	0.509616	0.179876	2.83315	0.00460916	0.045323	15.0349	15.0613	18.536	20.8713
ENSMUSG00000054252.17	Fgfr3	200.971	0.961674	0.339496	2.83265	0.00461638	0.045365	4.01686	4.87546	7.22426	8.8105
ENSMUSG00000028356.4	Ambp	80.7619	6.97162	2.46148	2.83229	0.00462158	0.0453884	0	0.113957	14.7958	0.515554
ENSMUSG00000071042.11	Rasgrp3	976.77	0.586986	0.207259	2.83213	0.00462386	0.0453884	9.84536	11.6502	15.3415	14.5298
ENSMUSG00000089824.10	Rbm12	2686.85	0.461064	0.16284	2.83138	0.0046347	0.0454697	21.8372	21.9328	26.7191	28.7195
ENSMUSG00000044641.7	Pard6b	618.627	-0.613884	0.21687	-2.83066	0.00464523	0.0455479	15.7136	12.7345	9.00725	8.05201
ENSMUSG00000034387.12	Ssu2	31.0552	2.56439	0.906019	2.83039	0.00464912	0.0455609	0.146785	0.610791	1.78677	2.64824
ENSMUSG00000028868.13	Wasf2	3597.51	-0.408114	0.144224	-2.82973	0.00465872	0.0456298	54.7224	50.1207	36.9952	35.6618
ENSMUSG00000030067.17	Foxp1	3698.2	0.851947	0.301126	2.8292	0.00466646	0.0456553	34.2705	61.7173	89.2445	72.2549
ENSMUSG00000038022.11	Fam188b	545.717	0.69118	0.244295	2.82928	0.00466526	0.0456553	6.33584	7.76436	10.2945	10.7807
ENSMUSG00000037887.11	Dusp8	248.485	-0.837393	0.296024	-2.8288	0.0046723	0.0456873	4.91188	3.67641	2.22217	2.16325
ENSMUSG00000102496.1	Gm36989	281.781	1.21203	0.428518	2.82843	0.00467765	0.0457145	7.22781	3.10581	9.59452	11.8959
ENSMUSG00000030555.15	Ttc23	1320.07	0.541207	0.191442	2.82701	0.00469853	0.0458712	41.5215	35.4781	48.42	54.2553
ENSMUSG00000033540.18	Idua	83.9147	-1.25516	0.443992	-2.82699	0.00469885	0.0458712	5.14598	4.73268	2.12481	1.6924
ENSMUSG00000048332.13	Lhfp	556.995	-0.610321	0.215924	-2.82656	0.0047051	0.045907	20.0886	20.8813	12.0849	12.6418
ENSMUSG00000023852.13	Chd1	7044.13	0.462624	0.163753	2.82514	0.00472599	0.0460855	51.1388	39.7832	51.5526	53.3586
ENSMUSG00000001467.5	Cyp51	5201.98	0.509033	0.180192	2.82496	0.00472872	0.0460869	67.1616	77.2192	90.6214	98.8238
ENSMUSG00000023026.15	Dip2b	2186.57	-0.433472	0.153493	-2.82404	0.00474219	0.0461824	19.9525	18.1794	13.1694	12.7921
ENSMUSG00000037062.13	Sh3glb1	5528.01	-0.436961	0.154741	-2.82382	0.00474552	0.0461824	85.7942	75.3197	58.8869	50.6063
ENSMUSG00000037722.7	Gnpnat1	1166.85	0.519935	0.184128	2.82376	0.00474632	0.0461824	23.9814	23.0254	29.5705	32.3769
ENSMUSG00000055409.13	Nell1	118.657	1.08853	0.385535	2.82343	0.00475127	0.0462053	0.9709	0.884327	1.71412	1.91768
ENSMUSG00000024991.7	Eif3a	20922.5	0.564195	0.199845	2.82317	0.00475517	0.046218	233.422	188.025	251.699	318.697
ENSMUSG00000032253.13	Phip	9126.15	0.846336	0.299812	2.82288	0.00475937	0.0462335	60.7602	32.7091	64.2558	88.5689
ENSMUSG00000005667.8	Mthfd2	1583.09	0.484133	0.171515	2.82268	0.00476241	0.0462378	52.6225	44.6531	62.5457	62.157
ENSMUSG00000025140.15	Pycr1	359.666	-1.23285	0.43692	-2.82168	0.00477723	0.046331	7.29626	17.167	4.65598	5.0495
ENSMUSG00000097777.7	Gm16794	49.6029	1.61826	0.573492	2.82177	0.00477598	0.046331	0.791213	0.812284	2.19943	2.40565
ENSMUSG00000050379.15	2020-09-06	3045.99	-0.442503	0.156973	-2.81897	0.00481783	0.0466993	59.1378	57.0403	38.0054	40.5942
ENSMUSG00000021676.9	Iqgap2	1251.93	0.596387	0.211592	2.81857	0.0048238	0.0467318	12.6065	9.75693	17.2027	13.807
ENSMUSG00000047731.17	Wbp1l	2572.02	-0.508213	0.180369	-2.81763	0.00483792	0.046843	57.3045	46.7525	36.6701	30.5661
ENSMUSG00000022139.16	Mbnl2	2691.98	0.655042	0.232497	2.81742	0.00484107	0.046848	34.9383	24.6544	38.0394	47.6077
ENSMUSG00000015396.3	Cd83	551.227	0.871623	0.309538	2.81588	0.00486432	0.0470217	9.7965	13.4688	16.5106	22.858
ENSMUSG00000022300.9	Dcaf13	2328.54	0.4342	0.154189	2.81602	0.00486222	0.0470217	84.2449	80.4099	101.479	103.109
ENSMUSG00000052825.6	Gm9892	1798.1	0.563711	0.200236	2.81524	0.00487412	0.0470653	104.646	84.4985	117.931	137.891
ENSMUSG00000061119.6	Prcp	1780.3	-0.463818	0.16475	-2.81529	0.00487337	0.0470653	45.7147	44.2528	29.2406	30.7608
ENSMUSG00000052133.16	Sema5b	65.0782	-1.77453	0.630419	-2.81485	0.00488005	0.047097	4.3826	1.90453	1.01604	0.639096
ENSMUSG00000024140.9	Epas1	764.291	-0.617133	0.219333	-2.81368	0.00489778	0.0472424	10.561	11.8424	7.44468	6.07716
ENSMUSG00000055917.14	Zfp277	1113.44	0.802447	0.285218	2.81345	0.00490131	0.0472508	28.2349	22.4298	31.387	49.1979
ENSMUSG00000057666.18	Gapdh	3197.43	0.992133	0.352667	2.81323	0.0049047	0.047258	50.2034	108.742	164.191	130.521
ENSMUSG00000020516.15	Rps6kb1	3093.7	0.464691	0.165205	2.81281	0.00491112	0.0472941	35.8541	32.8309	41.2822	45.7509
ENSMUSG00000021175.15	Cdca7l	1688.48	0.522072	0.18579	2.81001	0.00495395	0.0476398	32.2403	35.0781	42.5268	46.5893
ENSMUSG00000022793.16	B4galt4	725.189	-0.536349	0.19086	-2.81018	0.00495143	0.0476398	27.2055	25.794	17.2292	16.3929
ENSMUSG00000034127.14	Tspan8	49.1402	2.60941	0.928634	2.80994	0.00495505	0.0476398	0.373439	0.756698	5.6365	1.07136
ENSMUSG00000066191.11	Anks6	180.049	-1.03891	0.369897	-2.80866	0.00497484	0.0478042	5.43455	6.52916	3.25508	2.15502
ENSMUSG00000060096.4	Amd-ps3	545.423	0.703005	0.250409	2.80742	0.00499396	0.047962	16.6361	18.9899	24.3821	29.1524
ENSMUSG00000095134.2	Gm21857	339.044	0.702348	0.250193	2.80723	0.00499699	0.0479652	13.5695	13.04	21.4243	18.5445
ENSMUSG00000053469.13	Tg	16.8052	3.52883	1.25756	2.80609	0.00501462	0.0481084	0	0.033045	0.235619	0.202337
ENSMUSG00000085741.8	5430405H02Rik	369.987	-1.01057	0.36016	-2.8059	0.0050176	0.0481111	14.8934	22.6843	7.03704	10.2187
ENSMUSG00000030662.9	Ipo5	19722.9	0.480307	0.171255	2.80463	0.0050375	0.0482758	217.572	243.817	281.616	311.219
ENSMUSG00000038371.14	Sbf2	2972.8	0.701253	0.250061	2.80432	0.00504224	0.0482952	28.6617	26.3834	32.4994	49.4587
ENSMUSG00000031955.9	Bcar1	2206.19	-0.559155	0.199432	-2.80373	0.00505146	0.0483575	56.9403	50.0514	38.4501	28.4553
ENSMUSG00000066278.6	Vps37b	794.209	-0.595178	0.212519	-2.80058	0.00510104	0.0488058	27.2411	22.191	16.407	13.6135
ENSMUSG00000041406.14	BC055324	2086.54	0.491498	0.17551	2.8004	0.00510391	0.048807	41.8323	35.2859	47.7454	51.6259
ENSMUSG00000024190.6	Dusp1	441.373	-0.631255	0.225445	-2.80004	0.00510969	0.048836	18.9405	17.3265	10.6015	10.9017
ENSMUSG00000041959.14	S100a10	1022.31	-0.546197	0.195097	-2.79962	0.00511624	0.0488723	107.206	120.623	74.2187	69.9778
ENSMUSG00000032109.14	Nlrx1	108.336	-1.30149	0.464978	-2.79904	0.00512554	0.0489349	3.4803	1.95278	1.09669	0.909842
ENSMUSG00000102428.1	Pcdhga12	285.6	-0.861391	0.307796	-2.79858	0.00513283	0.0489782	5.94465	4.42743	3.01957	2.22053
ENSMUSG00000016253.12	Nelfcd	3154.09	-0.481297	0.172013	-2.79802	0.00514164	0.0490114	147.886	120.064	94.2764	82.0128
ENSMUSG00000034738.8	Nostrin	20.6647	3.43703	1.22838	2.79801	0.00514183	0.0490114	0	0.212922	1.71484	0.804631
ENSMUSG00000023919.7	Cenpq	1259.25	0.540836	0.193323	2.79758	0.00514874	0.049051	39.2104	31.9236	45.5699	49.2187
ENSMUSG00000026728.9	Vim	15840	-0.412586	0.147551	-2.79623	0.00517027	0.0492297	533.182	551.265	366.485	383.469
ENSMUSG00000031805.17	Jak3	272.521	-0.749645	0.268233	-2.79475	0.00519398	0.049429	5.5962	5.84692	3.16134	3.11401
ENSMUSG00000020719.14	Ddx5	42389.9	0.420552	0.150512	2.79414	0.00520372	0.0494952	724.628	666.591	813.036	897.161
ENSMUSG00000030093.7	Wnt7a	19.8304	-2.57921	0.923187	-2.79381	0.00520911	0.0495199	0.822144	0.566145	0.099643	0.11143
ENSMUSG00000050714.9	Zbtb26	1624.91	0.615831	0.220469	2.79327	0.00521774	0.0495755	16.3198	15.2772	19.1275	25.2682
ENSMUSG00000009828.15	Ick	1378.77	-0.593311	0.212522	-2.79176	0.00524216	0.0497809	25.6623	18.6186	14.3185	12.5614
ENSMUSG00000042323.16	Pbrm1	7368.76	0.450347	0.161382	2.79056	0.0052617	0.0499398	63.456	57.5556	71.3597	80.4122
ENSMUSG00000028051.10	Hcn3	96.6374	-1.54517	0.554209	-2.78807	0.00530224	0.0502441	1.70396	3.66932	0.998625	0.722036
ENSMUSG00000029830.15	Svopl	36.0781	-1.98371	0.711461	-2.78822	0.00529988	0.0502441	1.09821	1.82071	0.338954	0.351646
ENSMUSG00000030811.14	Fbxl19	3900.33	-0.671376	0.240789	-2.78823	0.00529961	0.0502441	105.491	90.2139	69.9044	43.5167
ENSMUSG00000062444.14	Ap3b2	221.089	-1.19164	0.427471	-2.78765	0.00530923	0.0502835	4.34892	6.34794	2.88411	1.49537
ENSMUSG00000007039.12	Ddah2	5939.05	-0.430543	0.154512	-2.78646	0.00532865	0.050431	368.083	306.743	230.404	229.193
ENSMUSG00000034926.3	Dhcr24	4932.18	0.568631	0.204077	2.78635	0.00533048	0.050431	58.2311	68.4895	98.9658	75.0564
ENSMUSG00000002059.17	Rab34	1871.14	0.468075	0.168013	2.78594	0.00533727	0.050463	88.2181	87.2565	107.924	115.487
ENSMUSG00000039263.16	Npepl1	1155.46	-0.511089	0.183462	-2.7858	0.00533954	0.050463	43.7733	37.5174	27.9349	24.4741
ENSMUSG00000006219.12	Fblim1	2534.15	-0.428223	0.153743	-2.78531	0.00534768	0.0505132	70.0839	63.6823	45.3293	46.028
ENSMUSG00000020074.6	Ccar1	8524.35	0.539584	0.193906	2.7827	0.00539082	0.0508936	112.549	88.05	121.617	145.294
ENSMUSG00000070867.4	Trabd2b	219.336	-1.20295	0.432546	-2.7811	0.00541754	0.0511187	2.70386	3.23129	1.64757	0.753727
ENSMUSG00000041420.18	Meis3	899.111	-0.517056	0.18594	-2.78076	0.00542313	0.0511443	42.0598	41.4379	28.5507	25.2431
ENSMUSG00000028063.15	Lmna	504.349	-0.605805	0.217943	-2.77965	0.00544183	0.0512934	19.313	16.9737	11.5404	10.3792
ENSMUSG00000040112.9	Mrps35	1526.69	0.460049	0.165565	2.77866	0.00545829	0.0514157	20.3911	20.5535	26.9738	24.9573
ENSMUSG00000042396.9	Rbm7	2921.04	0.516653	0.185945	2.77853	0.00546058	0.0514157	89.2987	83.0779	102.627	123.67
ENSMUSG00000022454.16	Nell2	511.016	0.593661	0.213736	2.77755	0.00547709	0.0515438	8.19321	7.42808	10.9686	10.6766
ENSMUSG00000049916.9	2610318N02Rik	1354.22	-0.483463	0.174107	-2.77681	0.00548949	0.0516332	78.3761	82.2555	55.1922	50.8485
ENSMUSG00000020277.9	Pfkl	6273.79	-0.479317	0.172628	-2.77658	0.00549335	0.0516421	122.514	138.141	93.2721	79.4786
ENSMUSG00000019913.3	Sim1	58.6508	1.81374	0.653472	2.77555	0.00551085	0.0517793	0.232245	0.22222	0.456756	1.00519
ENSMUSG00000020415.16	Pttg1	2170.47	0.446134	0.16079	2.77465	0.0055262	0.0518413	131.292	114.682	152.952	154.729
ENSMUSG00000030401.15	Rtn2	278.373	-0.789047	0.284364	-2.77478	0.00552397	0.0518413	10.6874	12.5537	6.10948	6.31323
ENSMUSG00000034973.16	Dopey1	780.921	0.696501	0.251011	2.77478	0.00552389	0.0518413	12.2965	16.1636	20.0542	22.5739
ENSMUSG00000023964.15	Calcr	150.858	-1.36509	0.492295	-2.77292	0.00555561	0.0520895	2.52779	5.49902	1.39817	1.50209
ENSMUSG00000036564.16	Ndrg4	311.037	-0.935366	0.337343	-2.77275	0.00555852	0.0520895	11.1625	9.55491	3.85149	6.06705
ENSMUSG00000067367.9	Lyar	1950.2	0.476992	0.172047	2.77244	0.00556372	0.0521108	76.6455	68.5771	88.6529	96.8845
ENSMUSG00000049336.16	Tenm2	105.138	-1.20125	0.433412	-2.77161	0.00557807	0.0522176	0.860512	1.03762	0.33077	0.430869
ENSMUSG00000015733.13	Capza2	7626.26	0.475564	0.171612	2.77116	0.00558565	0.0522611	158.517	168.541	195.497	222.941
ENSMUSG00000036955.15	Kif1bp	1210.44	-0.486912	0.175739	-2.77066	0.00559429	0.0523	41.4052	41.9697	28.9826	25.9057
ENSMUSG00000078670.3	Fam174b	1123.53	0.641172	0.231422	2.77058	0.0055957	0.0523	18.4896	23.7856	29.0466	31.9748
ENSMUSG00000022912.8	Pros1	889.022	-0.531029	0.191688	-2.77027	0.00560097	0.0523218	22.4413	19.0413	13.0619	13.26
ENSMUSG00000106926.1	Rpl7-ps7	2622.24	0.474438	0.171302	2.7696	0.0056126	0.0524029	169.744	183.572	219.498	233.016
ENSMUSG00000029366.10	Dck	2972.67	0.456467	0.164846	2.76904	0.00562212	0.0524367	52.1555	54.867	65.6108	69.6677
ENSMUSG00000031538.5	Plat	2570.08	0.663949	0.239774	2.76906	0.00562183	0.0524367	41.1381	59.4663	73.3281	74.3953
ENSMUSG00000039220.16	Ppp1r10	2018.89	-0.515031	0.186039	-2.76841	0.00563302	0.0525109	41.4697	38.1955	28.9077	22.4621
ENSMUSG00000024201.12	Kdm4b	1729.92	-0.611268	0.220836	-2.76798	0.00564052	0.0525532	37.018	29.1571	23.0586	16.777
ENSMUSG00000074934.3	Grem1	525.577	-0.588544	0.212657	-2.76757	0.00564758	0.0525914	9.82505	9.76587	6.30119	5.72697
ENSMUSG00000028224.14	Nbn	1490.25	0.547603	0.19799	2.76581	0.00567811	0.0527497	38.8866	37.7908	46.7485	56.2044
ENSMUSG00000039191.12	Rbpj	2419.93	0.489692	0.177067	2.76558	0.00568223	0.0527497	43.5324	48.3849	57.8496	61.1221
ENSMUSG00000044393.15	Dsg2	1485.78	0.586922	0.212235	2.76544	0.00568465	0.0527497	14.1818	14.2941	17.361	21.9346
ENSMUSG00000044576.6	Gareml	53.9323	-1.6097	0.582072	-2.76547	0.00568405	0.0527497	1.56022	1.15532	0.325108	0.480591
ENSMUSG00000046157.13	Tmem229b	150.801	-0.935854	0.338317	-2.76621	0.00567124	0.0527497	3.39208	3.49577	1.66507	1.64688
ENSMUSG00000053289.7	Ddx10	2028.99	0.461863	0.167015	2.7654	0.00568534	0.0527497	34.7338	30.7052	40.1052	42.588
ENSMUSG00000101335.1	Gm28229	229.304	1.02324	0.369978	2.76569	0.00568034	0.0527497	5.90806	3.25938	8.26534	8.57896
ENSMUSG00000007827.10	Ankrd26	1625.72	0.698718	0.252682	2.76521	0.00568858	0.0527521	16.8862	10.5212	19.1771	21.3405
ENSMUSG00000018263.11	Tbx5	525.457	2.50894	0.907572	2.76445	0.00570185	0.0527926	1.21918	4.7076	19.3832	12.6467
ENSMUSG00000030499.9	Kctd15	2119.14	-0.539078	0.194999	-2.76452	0.00570069	0.0527926	76.772	63.1362	49.7432	38.8148
ENSMUSG00000044573.14	Acp1	2113.27	-0.496992	0.179767	-2.76464	0.00569856	0.0527926	48.9558	53.4291	32.0729	34.7995
ENSMUSG00000036620.14	Mgat4b	1589.2	-0.627741	0.227117	-2.76395	0.00571064	0.0528465	72.5782	52.1329	41.6908	32.3682
ENSMUSG00000070605.4	Gm13251	690.47	0.703023	0.254418	2.76326	0.00572277	0.0529311	8.80882	6.16649	10.3078	11.9213
ENSMUSG00000082454.3	Gm12183	4221.59	0.465706	0.168562	2.76281	0.00573059	0.0529759	128.645	118.83	146.334	167.419
ENSMUSG00000044461.5	Shisa2	2562.88	-0.499984	0.181012	-2.76216	0.00574206	0.0530544	69.4919	54.0065	42.0697	38.0504
ENSMUSG00000024491.15	Rbm27	2313.78	0.508052	0.183983	2.7614	0.00575534	0.0531285	21.5022	18.0086	24.1081	27.3742
ENSMUSG00000029177.9	Cenpa	4115.14	0.466549	0.168956	2.76136	0.00575606	0.0531285	172.464	169.592	241.903	194.161
ENSMUSG00000021271.4	Zfp839	270.798	-0.791785	0.286901	-2.75979	0.00578391	0.0532749	6.73207	5.201	3.39137	2.9203
ENSMUSG00000027677.17	Ttc14	3082.17	0.605474	0.219356	2.76023	0.00577598	0.0532749	36.9694	24.8061	41.758	44.1162
ENSMUSG00000044948.16	Cfap43	789.741	-0.624026	0.226086	-2.76012	0.00577793	0.0532749	18.9779	13.9369	10.3549	9.19446
ENSMUSG00000072582.9	Ptrh2	2052.88	0.480158	0.173982	2.75981	0.00578342	0.0532749	34.7232	37.3297	45.0618	47.6255
ENSMUSG00000087143.9	A830082K12Rik	523.392	-0.948783	0.343812	-2.7596	0.00578724	0.0532779	37.8651	34.4337	23.1242	11.6341
ENSMUSG00000032440.12	Tgfbr2	793.683	-0.580983	0.210613	-2.75853	0.00580626	0.053369	13.4887	12.4795	8.95915	7.03718
ENSMUSG00000037942.5	Crp	28.8856	-2.68343	0.972818	-2.75841	0.0058084	0.053369	1.40944	2.35137	0.465761	0.089369
ENSMUSG00000039621.13	Prex1	1516.79	-1.02413	0.371282	-2.75836	0.00580913	0.053369	38.7499	16.616	14.8831	9.96068
ENSMUSG00000044254.6	Pcsk9	71.4339	1.56239	0.566402	2.75845	0.00580769	0.053369	0.448881	0.8369	2.13029	1.50572
ENSMUSG00000070003.6	Ssbp4	1299.12	-0.54207	0.196571	-2.75763	0.00582215	0.0534609	69.1921	65.5044	48.1096	37.2361
ENSMUSG00000034391.10	Fbxo15	31.962	2.99631	1.08687	2.75682	0.00583662	0.0535109	0	0.56248	2.45745	2.28131
ENSMUSG00000040938.16	Slc16a11	45.6249	-1.66226	0.602933	-2.75696	0.00583411	0.0535109	3.32317	2.28229	0.840718	0.757401
ENSMUSG00000079003.1	Samd1	2274.49	-0.51858	0.188104	-2.75688	0.00583563	0.0535109	82.0068	84.5484	60.4802	46.9153
ENSMUSG00000031697.11	Orc6	2576.91	0.427116	0.154946	2.75654	0.00584166	0.0535295	85.6936	85.9771	105.526	107.06
ENSMUSG00000030281.16	Il17rc	51.2068	-1.53441	0.556709	-2.75622	0.00584742	0.0535547	2.56902	2.74172	0.804775	0.88256
ENSMUSG00000100980.1	Gm29100	123.586	-2.2372	0.811808	-2.75583	0.00585432	0.0535903	5.40758	0.687211	0.703167	0.457685
ENSMUSG00000030890.15	Ilk	2489.71	-0.428037	0.155335	-2.75557	0.00585893	0.0536048	152.415	136.559	103.826	93.7186
ENSMUSG00000030264.14	Thumpd3	1762.46	0.490999	0.178225	2.75493	0.00587039	0.0536269	51.0276	50.1892	61.6323	69.1204
ENSMUSG00000033282.13	Rpgrip1l	1063.88	0.6468	0.234769	2.75505	0.00586828	0.0536269	7.4971	8.17329	9.82335	12.7465
ENSMUSG00000063047.8	Zfp780b	757.826	0.794095	0.288218	2.75519	0.00586582	0.0536269	13.6099	9.59999	15.1452	21.4866
ENSMUSG00000026971.15	Itgb6	67.5884	-1.46866	0.533183	-2.75452	0.00587784	0.053645	1.67396	1.00007	0.470878	0.407646
ENSMUSG00000089998.2	Phtf1os	582.696	0.593814	0.215581	2.75449	0.00587841	0.053645	7.89819	6.93498	11.1068	9.45696
ENSMUSG00000102049.1	Zbed6	1479.94	0.642303	0.233258	2.75362	0.00589399	0.0537596	13.2042	16.4109	19.2037	23.4687
ENSMUSG00000031990.14	Jam3	2710	0.414718	0.150634	2.75316	0.00590237	0.0538034	78.3395	77.6413	99.3872	92.2338
ENSMUSG00000035476.9	Tab3	1086.35	0.585572	0.212702	2.75302	0.00590485	0.0538034	10.5982	7.90138	12.3451	13.0238
ENSMUSG00000072849.10	Serpina1e	17.4741	3.44289	1.25092	2.75228	0.00591811	0.0538967	0.04342	0.137617	1.95121	0.523522
ENSMUSG00000001227.11	Sema6b	154.285	-0.973302	0.353832	-2.75075	0.00594593	0.0541223	3.79193	3.07618	1.80803	1.40407
ENSMUSG00000031358.17	Msl3	1311.34	0.598091	0.217454	2.75042	0.00595182	0.0541482	37.9549	37.9979	46.3951	59.1898
ENSMUSG00000059741.13	Myl3	32.8419	-3.32894	1.21069	-2.74963	0.00596629	0.0542521	4.95361	4.26473	0.878297	0
ENSMUSG00000027552.14	E2f5	2403.82	0.499675	0.181759	2.74911	0.0059757	0.0543099	66.5449	77.2319	93.9432	93.874
ENSMUSG00000041354.15	Rgl2	1283.09	-0.510802	0.185835	-2.74868	0.00598351	0.0543531	39.8699	41.2611	28.658	23.9151
ENSMUSG00000001833.16	2020-09-07	10320	0.570832	0.207749	2.7477	0.00600143	0.0544787	242.455	181.629	258.117	317.983
ENSMUSG00000018160.15	Med1	3780.09	0.435337	0.158443	2.74759	0.00600354	0.0544787	45.102	47.0108	55.9854	58.7451
ENSMUSG00000031906.8	Smpd3	160.195	-0.964283	0.350977	-2.74742	0.00600654	0.0544787	2.59937	2.70381	1.44663	1.07093
ENSMUSG00000002250.15	Ppard	280.002	-0.856115	0.311666	-2.7469	0.00601623	0.0545387	9.46345	12.0766	6.25857	4.85871
ENSMUSG00000030031.14	Kbtbd8	646.006	0.692914	0.252336	2.746	0.00603277	0.0546608	7.54663	5.61003	8.77747	10.5974
ENSMUSG00000057156.10	Homez	224.193	-1.13413	0.413064	-2.74565	0.00603917	0.0546717	5.95233	11.0582	3.47547	3.77968
ENSMUSG00000097330.2	Gm26672	151.353	-1.07285	0.390753	-2.7456	0.00604013	0.0546717	5.40171	3.36712	2.03337	1.75544
ENSMUSG00000043458.5	Pcdhb12	15.6827	-3.72255	1.35627	-2.7447	0.00605667	0.0547936	1.07263	0.175793	0.034493	0.058249
ENSMUSG00000026360.9	Rgs2	1532.43	-0.490034	0.178562	-2.74433	0.00606342	0.0548268	52.9427	44.4323	31.0406	32.5019
ENSMUSG00000001729.14	Akt1	6526.04	-0.439607	0.160201	-2.74409	0.00606783	0.0548387	217.658	177.288	140.399	127.078
ENSMUSG00000004328.15	Hif3a	1009.98	-0.580193	0.211466	-2.74367	0.00607572	0.0548542	14.4897	15.1542	10.3733	7.95631
ENSMUSG00000019894.13	Slc6a15	282.745	-0.954792	0.347986	-2.74376	0.00607392	0.0548542	8.54246	4.86314	3.13165	3.14536
ENSMUSG00000081026.1	Gm11855	16.6576	4.54829	1.65803	2.74319	0.00608458	0.0549064	0	0.090198	1.89798	0.200641
ENSMUSG00000062981.4	Mrpl42	1623.86	0.556747	0.20301	2.74247	0.00609799	0.0549747	118.523	134.918	159.904	184.036
ENSMUSG00000102700.1	Gm38312	66.0618	1.43553	0.52345	2.74245	0.00609833	0.0549747	1.55514	1.11302	2.95861	3.56651
ENSMUSG00000081738.1	Hmgb1-ps2	1377.33	0.563138	0.205358	2.74223	0.00610236	0.0549831	107.46	117.222	140.293	165.635
ENSMUSG00000090862.3	Rps13	10180.6	0.529398	0.193095	2.74164	0.00611338	0.0550545	671.618	851.724	1019.38	1011.82
ENSMUSG00000038151.12	Prdm1	830.203	-0.848529	0.309641	-2.74036	0.00613713	0.0552404	18.3836	13.8793	10.6059	5.91101
ENSMUSG00000039756.12	Dnttip2	2884.29	0.531337	0.193918	2.74001	0.00614369	0.0552714	72.0123	56.6002	79.1115	90.9764
ENSMUSG00000042328.13	Hps4	725.563	-0.731458	0.267027	-2.73926	0.00615777	0.0553421	37.0662	23.7739	18.1605	15.3047
ENSMUSG00000047648.13	Fbxo30	2705.33	0.537201	0.196107	2.73932	0.00615658	0.0553421	29.8949	26.4127	33.4784	41.4066
ENSMUSG00000028161.17	Ppp3ca	2585.92	-0.415139	0.151595	-2.73848	0.00617244	0.0554459	46.2604	41.7752	31.5031	29.2264
ENSMUSG00000031197.11	Vbp1	3434.67	0.478958	0.174985	2.73713	0.00619779	0.0556174	124.503	110.469	139.558	160.805
ENSMUSG00000060675.13	Pla2g16	216.304	-0.937867	0.342645	-2.73714	0.00619766	0.0556174	9.53838	12.9277	5.07245	5.8104
ENSMUSG00000018820.13	Zfyve27	445.368	-0.678517	0.247953	-2.73648	0.00621009	0.0556716	29.2606	28.2316	18.8333	14.3125
ENSMUSG00000044551.13	9930012K11Rik	314.436	-0.791785	0.289333	-2.73659	0.00620795	0.0556716	13.9268	14.4712	8.85892	6.30172
ENSMUSG00000074846.3	Gm10774	16.2723	5.9106	2.16029	2.73602	0.00621872	0.0557208	0.267445	0.145726	18.9382	0.138011
ENSMUSG00000028019.9	Pdgfc	3630.7	0.512373	0.187303	2.73553	0.00622796	0.0557755	71.3016	54.9369	78.6265	86.2234
ENSMUSG00000024245.4	Tmem178	97.6346	-1.2293	0.449446	-2.73516	0.00623504	0.0558108	5.79303	4.64392	2.47942	1.59896
ENSMUSG00000029361.18	Nos1	50.4571	-1.82044	0.665698	-2.73464	0.00624489	0.0558615	0.604254	0.400495	0.180814	0.079342
ENSMUSG00000029510.15	Gpc2	1707.57	-0.4795	0.175364	-2.73432	0.00625099	0.0558615	81.8482	67.3016	51.2966	46.9019
ENSMUSG00000050511.1	Oprd1	58.5275	-1.44693	0.529177	-2.7343	0.00625125	0.0558615	1.55336	1.20201	0.448392	0.475676
ENSMUSG00000078887.10	Gm6710	191.29	0.853424	0.31213	2.7342	0.00625327	0.0558615	6.88306	6.06863	10.3713	11.1083
ENSMUSG00000029729.12	Zkscan1	4903.7	0.648203	0.237112	2.73374	0.00626189	0.0558832	26.8148	35.7908	40.1759	50.3151
ENSMUSG00000040550.16	Otud6b	2793	0.498365	0.182302	2.73374	0.00626199	0.0558832	48.5875	45.9635	56.0922	66.5463
ENSMUSG00000029375.6	Cxcl15	70.949	1.48465	0.543176	2.73328	0.00627066	0.0559217	1.0241	1.22842	2.2714	3.53098
ENSMUSG00000045330.8	4933402E13Rik	96.8457	4.76367	1.7429	2.73318	0.00627259	0.0559217	0.172029	0.268947	10.9894	0.486651
ENSMUSG00000004056.15	Akt2	2610.45	-0.458185	0.167664	-2.73275	0.00628083	0.0559671	55.8946	51.0778	39.2721	32.4704
ENSMUSG00000026207.16	Speg	824.177	-0.523716	0.191691	-2.73208	0.00629352	0.056052	28.1651	29.4069	18.5772	18.3824
ENSMUSG00000025575.14	Cant1	1384.86	-0.455852	0.166888	-2.73148	0.00630507	0.0560706	25.0503	24.8617	17.4424	16.1099
ENSMUSG00000035342.13	Lzts2	3550.64	-0.423076	0.154885	-2.73155	0.00630367	0.0560706	100.591	87.3094	67.9985	60.8374
ENSMUSG00000096793.7	Gm3002	82.0524	1.46851	0.537608	2.73156	0.00630355	0.0560706	3.03729	1.39329	5.2862	5.39604
[truncated: 24,518 more rows]

## Sheet: DEGs (padj<0.05)
gene_id	gene_name	baseMean	log2FoldChange	lfcSE	stat	pvalue	padj	TPM.Shh1	TPM.Shh2	TPM.WT4	TPM.WT6
ENSMUSG00000006057.15	Atp5g1	2167.32	-2.3086	0.160058	-14.4235	3.68e-47	6.55e-43	122.443	117.625	23.7133	20.9281
ENSMUSG00000021466.11	Ptch1	3992.91	2.19035	0.156769	13.9718	2.32e-44	2.06e-40	12.9276	13.8412	57.7523	55.0726
ENSMUSG00000026344.9	Lypd1	289.564	-5.2961	0.40568	-13.0549	5.96e-39	3.53e-35	6.00712	6.22428	0.203084	0.089529
ENSMUSG00000047423.9	AI837181	354.523	7.50844	0.612603	12.2566	1.55e-34	6.88e-31	0.374602	0.050337	28.9758	25.6888
ENSMUSG00000024987.5	Cyp26a1	454.493	-3.52182	0.301283	-11.6894	1.44e-31	5.13e-28	36.979	24.1552	2.49899	2.35073
ENSMUSG00000027500.10	Stmn2	1781.4	-2.24989	0.193681	-11.6164	3.4e-31	1.01e-27	89.0678	103.199	18.1956	19.1028
ENSMUSG00000097336.8	Fendrr	734.26	4.956	0.428152	11.5753	5.5e-31	1.4e-27	0.668438	2.13279	52.3267	35.8223
ENSMUSG00000030905.5	Crym	689.871	-3.16179	0.273985	-11.54	8.29e-31	1.84e-27	69.6073	46.0776	6.52102	5.3085
ENSMUSG00000010476.13	Ebf3	2201.56	-1.8423	0.160772	-11.4591	2.12e-30	4.18e-27	47.8301	41.7877	11.9758	10.9928
ENSMUSG00000040310.12	Alx4	630.231	-4.57159	0.400658	-11.4102	3.72e-30	6.61e-27	16.7453	10.8397	0.765684	0.312293
ENSMUSG00000022053.13	Ebf2	497.037	-2.66869	0.234222	-11.3939	4.49e-30	7.25e-27	15.5239	13.3854	2.23169	1.93548
ENSMUSG00000078190.6	Dnm3os	1104.57	-4.36502	0.385343	-11.3276	9.58e-30	1.42e-26	19.6698	14.7026	0.447035	1.07219
ENSMUSG00000010607.8	Pigyl	198.243	-6.65215	0.588411	-11.3053	1.24e-29	1.69e-26	32.7669	39.7978	0.390094	0.301503
ENSMUSG00000025359.9	Pmel	275.606	-4.66412	0.427184	-10.9183	9.43e-28	1.2e-24	19.0393	13.1781	0.35877	0.777421
ENSMUSG00000051367.8	Six1	1290.05	-2.76813	0.254614	-10.8719	1.57e-27	1.86e-24	55.4805	45.7549	8.38585	5.30673
ENSMUSG00000059173.19	Pde1a	286.248	4.07977	0.391804	10.4128	2.17e-25	2.41e-22	0.721313	0.585351	12.9193	7.37887
ENSMUSG00000040274.11	Cdk6	1367.38	1.97457	0.190521	10.3641	3.61e-25	3.78e-22	4.90169	5.48057	19.8431	17.6964
ENSMUSG00000053093.15	Myh7	793.76	-2.39669	0.2328	-10.2951	7.42e-25	7.33e-22	16.7906	12.5558	2.7904	2.32355
ENSMUSG00000028519.16	Dab1	291.571	-2.85111	0.279823	-10.189	2.22e-24	2.08e-21	11.2824	11.3092	1.40183	1.49606
ENSMUSG00000064080.12	Fbln2	1244.11	-1.92012	0.190372	-10.0862	6.36e-24	5.65e-21	67.1857	54.5397	15.5487	13.9765
ENSMUSG00000038530.11	Rgs4	1251.14	-2.66482	0.26513	-10.051	9.09e-24	7.7e-21	48.0543	46.6534	8.66242	5.15682
ENSMUSG00000064325.3	Hhip	313.421	5.32853	0.53318	9.99388	1.62e-23	1.31e-20	0.149252	0.6348	11.2538	15.2467
ENSMUSG00000062380.3	Tubb3	3277.32	-2.60544	0.267943	-9.72384	2.39e-22	1.84e-19	184.331	203.397	37.5996	21.501
ENSMUSG00000001280.12	Sp1	1713.95	2.00378	0.211213	9.487	2.38e-21	1.76e-18	12.9226	15.3841	49.6492	55.9235
ENSMUSG00000089726.2	Mir17hg	2496.5	1.51509	0.161638	9.37333	7.03e-21	5e-18	22.8261	24.2378	63.0573	61.0794
ENSMUSG00000022055.7	Nefl	4323.01	-2.43064	0.262706	-9.2523	2.2e-20	1.5e-17	127.158	150.177	29.9384	17.791
ENSMUSG00000053930.13	Shisa6	170.88	-3.66966	0.402294	-9.12185	7.38e-20	4.86e-17	3.47347	2.56359	0.261404	0.173603
ENSMUSG00000035799.5	Twist1	2314.88	-1.47404	0.161975	-9.10043	9e-20	5.71e-17	146.981	125.029	46.0909	43.831
ENSMUSG00000052957.7	Gas1	4356.6	-1.78687	0.19739	-9.05248	1.4e-19	8.57e-17	158.284	136.228	45.536	33.1139
ENSMUSG00000029005.4	Draxin	978.616	-2.06598	0.228941	-9.02407	1.81e-19	1.07e-16	21.9658	17.3085	4.9193	3.69962
ENSMUSG00000040752.15	Myh6	423.703	-2.15861	0.240476	-8.97642	2.8e-19	1.6e-16	8.1014	7.59446	1.54358	1.69275
ENSMUSG00000055254.14	Ntrk2	740.62	-2.18211	0.244346	-8.9304	4.24e-19	2.36e-16	9.73422	12.104	2.1011	2.34784
ENSMUSG00000044338.9	Aplnr	1586.33	-1.6087	0.180431	-8.91584	4.84e-19	2.61e-16	39.5875	43.4878	13.203	11.9533
ENSMUSG00000034336.3	Ina	534.089	-2.47535	0.278109	-8.90062	5.55e-19	2.9e-16	16.3135	19.5805	3.52226	2.46192
ENSMUSG00000025215.10	Tlx1	167.717	-4.02599	0.453061	-8.8862	6.32e-19	3.21e-16	9.96664	9.90395	0.802906	0.337438
ENSMUSG00000038248.8	Sobp	708.812	-1.94603	0.219547	-8.86385	7.73e-19	3.82e-16	16.8446	13.6467	3.94518	3.31637
ENSMUSG00000033227.7	Wnt6	317.973	-2.47411	0.282401	-8.76097	1.94e-18	9.3e-16	20.5422	15.7329	3.13203	2.84167
ENSMUSG00000051920.6	Rspo2	1054.39	1.66664	0.1907	8.73957	2.34e-18	1.09e-15	10.7519	8.91118	29.9672	27.2472
ENSMUSG00000035566.6	Pcdh17	493.418	-1.98978	0.229261	-8.67911	3.99e-18	1.82e-15	5.18296	5.48869	1.31204	1.1685
ENSMUSG00000061524.8	Zic2	117.791	-6.6628	0.77189	-8.6318	6.04e-18	2.68e-15	8.88714	6.29785	0.112039	0.041388
ENSMUSG00000020950.10	Foxg1	869.626	1.64265	0.190531	8.62142	6.61e-18	2.87e-15	7.00073	6.89757	21.0962	18.9155
ENSMUSG00000091462.1	Gm17084	119.837	-3.91567	0.456086	-8.58539	9.05e-18	3.83e-15	15.3831	13.5857	0.715224	1.04667
ENSMUSG00000000296.7	Tpd52l1	352.502	2.17244	0.256029	8.48511	2.16e-17	8.71e-15	6.42953	6.56423	27.423	26.6305
ENSMUSG00000027338.16	Prnd	96.003	4.61515	0.543808	8.48674	2.13e-17	8.71e-15	0.175131	0.191794	4.57947	4.09569
ENSMUSG00000057098.14	Ebf1	891.708	-1.62921	0.192664	-8.45623	2.76e-17	1.09e-14	19.9275	19.2542	6.31456	5.3542
ENSMUSG00000048540.8	Nhlh2	738.032	-3.77375	0.44999	-8.38629	5.02e-17	1.94e-14	26.4958	28.6947	2.88625	0.884067
ENSMUSG00000025216.9	Lbx1	99.8727	-4.69493	0.564262	-8.32049	8.76e-17	3.31e-14	6.07643	3.97841	0.191145	0.162078
ENSMUSG00000003410.7	Elavl3	632.716	-2.35065	0.283948	-8.27843	1.25e-16	4.62e-14	14.1938	12.9577	3.06964	1.85035
ENSMUSG00000044155.11	Lsm8	2739.34	-1.24411	0.150454	-8.26903	1.35e-16	4.9e-14	162.828	161.052	65.2555	60.7274
ENSMUSG00000027832.5	Ptx3	1231.87	-1.8994	0.230586	-8.23728	1.76e-16	6.26e-14	64.0424	69.8639	19.5153	13.7191
ENSMUSG00000097084.1	Foxl1	193.619	3.51072	0.427603	8.21023	2.21e-16	7.69e-14	0.461815	0.940872	8.42893	7.25718
ENSMUSG00000022054.11	Nefm	7129.46	-2.51494	0.308187	-8.16043	3.34e-16	1.14e-13	221.828	246.421	51.3282	24.7677
ENSMUSG00000059049.14	Frem1	2419.88	1.46847	0.181594	8.0866	6.14e-16	2.06e-13	10.7406	11.4683	26.6446	29.9788
ENSMUSG00000028261.13	Ndufaf4	731.959	-1.62692	0.20136	-8.07965	6.5e-16	2.14e-13	30.1391	31.506	9.15953	9.23079
ENSMUSG00000091695.1	Gm17669	432.62	-2.40977	0.301007	-8.00571	1.19e-15	3.84e-13	82.5632	118.122	17.6155	17.4479
ENSMUSG00000048758.13	Rpl29	1680.27	-1.85762	0.233446	-7.95739	1.76e-15	5.58e-13	194.358	266.478	59.8467	57.8591
ENSMUSG00000004415.15	Col26a1	5553.88	-1.30095	0.163718	-7.94628	1.92e-15	5.99e-13	212.364	196.241	84.5219	68.3178
ENSMUSG00000040260.7	Daam2	1457.02	-1.86173	0.235676	-7.89954	2.8e-15	8.58e-13	28.1923	20.7257	7.14651	5.21992
ENSMUSG00000020000.7	Moxd1	1975.15	1.56165	0.197978	7.88798	3.07e-15	9.25e-13	21.9307	20.1997	51.3235	62.7622
ENSMUSG00000027750.16	Postn	2316.52	-2.22563	0.282969	-7.86528	3.68e-15	1.09e-12	118.765	67.7584	16.2382	20.0735
ENSMUSG00000033740.17	St18	317.768	-3.42787	0.437194	-7.8406	4.48e-15	1.31e-12	7.15892	8.45784	0.977877	0.375359
ENSMUSG00000000120.6	Ngfr	1291.89	-1.71002	0.218877	-7.81267	5.6e-15	1.61e-12	38.531	35.5248	12.2349	8.66389
ENSMUSG00000051022.7	Hs3st1	170.889	-2.65762	0.341624	-7.77938	7.29e-15	2.06e-12	11.9324	11.3118	1.83925	1.55294
ENSMUSG00000057777.4	Mab21l2	888.348	-2.61009	0.337474	-7.73421	1.04e-14	2.89e-12	47.8181	26.5263	6.88215	4.28363
ENSMUSG00000005220.10	Corin	499.318	-2.75391	0.35631	-7.72896	1.08e-14	2.92e-12	17.866	11.3913	1.49253	2.47248
ENSMUSG00000042607.15	Asb4	4095.16	-1.14815	0.148554	-7.72884	1.09e-14	2.92e-12	114.175	108.87	45.3387	47.2123
ENSMUSG00000074622.4	Mafb	646.829	-1.61859	0.210361	-7.69437	1.42e-14	3.77e-12	18.9303	18.4429	5.33973	5.85402
ENSMUSG00000107591.1	RP23-252F4.4	76.9721	-5.62824	0.732086	-7.68795	1.5e-14	3.91e-12	23.7649	18.9235	0.244472	0.519298
ENSMUSG00000073889.10	Il11ra1	782.234	-1.4583	0.19023	-7.66601	1.77e-14	4.57e-12	57.8376	52.2692	18.662	18.1649
ENSMUSG00000029675.12	Eln	634.976	-1.5347	0.202704	-7.57113	3.7e-14	9.4e-12	18.9438	17.1556	5.75838	5.69211
ENSMUSG00000040610.7	Tlx3	137.216	-4.48198	0.60011	-7.46861	8.1e-14	2.03e-11	12.6088	9.53557	0.7401	0.164688
ENSMUSG00000069171.13	Nr2f1	4650.34	-1.23026	0.164945	-7.45861	8.74e-14	2.16e-11	152.085	127.504	59.1775	50.4003
ENSMUSG00000027220.2	Syt13	416.245	-2.90786	0.390866	-7.43954	1.01e-13	2.46e-11	13.9397	11.2929	2.17677	0.934257
ENSMUSG00000048978.13	Nrsn1	157.089	-2.65498	0.358974	-7.39601	1.4e-13	3.37e-11	8.87685	7.27253	1.22773	1.10804
ENSMUSG00000037610.15	Kcnmb2	220.644	-2.90181	0.393953	-7.36587	1.76e-13	4.17e-11	7.82351	9.32561	1.39776	0.741517
ENSMUSG00000048126.16	Col6a3	538.217	-2.71037	0.369258	-7.34005	2.14e-13	4.93e-11	8.85123	6.37684	0.723722	1.39921
ENSMUSG00000062432.4	Cyp26c1	88.2745	-6.64471	0.905108	-7.34135	2.11e-13	4.93e-11	8.15059	4.82497	0	0.115612
ENSMUSG00000073489.5	Ifi204	331.101	1.95478	0.269001	7.26681	3.68e-13	8.39e-11	3.58222	4.10481	14.4363	13.3494
ENSMUSG00000032318.12	Isl2	341.09	-2.2051	0.304116	-7.25086	4.14e-13	9.32e-11	27.6604	21.992	5.9046	3.98037
ENSMUSG00000007946.10	Phox2a	326.113	-2.76925	0.382815	-7.23391	4.69e-13	1.04e-10	22.3452	23.1872	4.23473	1.98604
ENSMUSG00000027868.11	Tbx15	160.106	-2.80198	0.388545	-7.21147	5.54e-13	1.21e-10	6.03186	4.1272	0.632843	0.696497
ENSMUSG00000099032.2	Tcf24	161.391	-2.6148	0.37031	-7.0611	1.65e-12	3.58e-10	5.48016	6.54215	0.989152	0.826792
ENSMUSG00000068327.5	Tlx2	224.354	-2.42771	0.3439	-7.05935	1.67e-12	3.58e-10	15.1545	18.9915	3.41176	2.50716
ENSMUSG00000031595.9	Pdgfrl	349.356	-1.75515	0.251071	-6.99066	2.74e-12	5.79e-10	23.9124	20.5238	6.30242	5.77912
ENSMUSG00000047686.9	Zcchc5	217.176	2.83156	0.405469	6.98342	2.88e-12	6.03e-10	0.91812	1.35152	6.21222	9.07489
ENSMUSG00000053825.14	Ppfia2	250.905	2.05458	0.294309	6.98102	2.93e-12	6.06e-10	0.974419	1.07358	4.07769	3.8225
ENSMUSG00000048251.15	Bcl11b	902.325	-1.7298	0.249971	-6.91999	4.52e-12	9.23e-10	14.9166	10.6082	4.02702	3.03825
ENSMUSG00000106885.1	Eif3s6-ps4	138.722	10.3572	1.49893	6.90976	4.85e-12	9.81e-10	0	0	10.2836	13.3417
ENSMUSG00000060548.12	Tnfrsf19	2137.71	1.27537	0.185181	6.88715	5.69e-12	1.14e-09	16.8947	17.7521	36.0206	41.2316
ENSMUSG00000037025.11	Foxa2	641.475	2.35585	0.343569	6.857	7.03e-12	1.39e-09	5.33544	9.12188	29.1675	39.7894
ENSMUSG00000056222.14	Spock1	292.928	-2.29688	0.339063	-6.77419	1.25e-11	2.44e-09	6.49329	8.81359	1.70032	1.19371
ENSMUSG00000034324.16	Tmem132c	2168.79	-1.45046	0.214398	-6.76526	1.33e-11	2.57e-09	50.0262	35.7993	15.8229	12.9899
ENSMUSG00000030653.16	Pde2a	693.04	-1.71331	0.253357	-6.76246	1.36e-11	2.59e-09	14.3444	17.9861	5.13564	4.01316
ENSMUSG00000022220.13	Adcy4	699.711	-1.49156	0.220651	-6.7598	1.38e-11	2.61e-09	20.0391	18.0281	7.0261	5.43252
ENSMUSG00000045515.3	Pou3f3	108.008	-2.97964	0.440877	-6.75844	1.39e-11	2.61e-09	1.59554	1.72953	0.226856	0.162473
ENSMUSG00000025407.6	Gli1	1316.97	2.76439	0.409295	6.75402	1.44e-11	2.66e-09	3.20371	8.44549	41.6646	32.8808
ENSMUSG00000027581.12	Stmn3	285.139	-2.04191	0.302895	-6.74131	1.57e-11	2.88e-09	22.8332	28.9566	6.1711	5.49739
ENSMUSG00000019817.18	Plagl1	6689.94	1.59305	0.23675	6.72886	1.71e-11	3.1e-09	56.8964	45.7859	116.073	167.063
ENSMUSG00000031375.17	Bgn	1331.47	-1.11568	0.166137	-6.71542	1.88e-11	3.37e-09	51.5327	48.454	21.5193	20.9324
ENSMUSG00000047261.9	Gap43	1859.8	-1.17929	0.175717	-6.71132	1.93e-11	3.43e-09	116.77	117.247	52.2418	43.1356
ENSMUSG00000030350.8	Prmt8	75.2258	-5.60127	0.839136	-6.67505	2.47e-11	4.35e-09	3.11168	3.85068	0.144705	0
ENSMUSG00000030825.17	Hsd17b14	71.3445	-3.90754	0.586054	-6.66755	2.6e-11	4.51e-09	7.51222	6.94935	0.599524	0.287572
ENSMUSG00000037306.13	Man1c1	593.198	-1.58049	0.237069	-6.6668	2.61e-11	4.51e-09	14.9505	11.7781	4.53501	3.66791
ENSMUSG00000017897.18	Eya2	418.892	-1.62568	0.243997	-6.6627	2.69e-11	4.55e-09	26.1348	21.3865	7.47456	6.6952
ENSMUSG00000027508.15	Pag1	1055.61	1.44783	0.2173	6.66284	2.69e-11	4.55e-09	4.06768	5.07738	11.6503	11.505
ENSMUSG00000028152.10	Tspan5	1072.12	-1.26124	0.191881	-6.57307	4.93e-11	8.27e-09	22.6029	18.8211	8.4955	7.3639
ENSMUSG00000091455.3	Otogl	127.436	10.2348	1.55779	6.57008	5.03e-11	8.35e-09	0	0	1.20189	3.03682
ENSMUSG00000062647.16	Rpl7a	3012.82	-1.12244	0.170957	-6.5656	5.18e-11	8.53e-09	295.893	326.5	129.131	134.382
ENSMUSG00000014603.2	Alx3	127.85	-3.02574	0.461016	-6.5632	5.27e-11	8.59e-09	9.93251	5.84879	1.02535	0.749482
ENSMUSG00000004366.3	Sst	94.7053	-4.46457	0.681477	-6.55131	5.7e-11	9.22e-09	10.8207	27.6955	0.95343	0.672122
ENSMUSG00000004872.15	Pax3	107.933	-4.51492	0.689905	-6.54426	5.98e-11	9.58e-09	3.76689	3.8447	0.269821	0.039213
ENSMUSG00000009281.6	Rarres2	378.838	-1.71985	0.263786	-6.51987	7.04e-11	1.12e-08	31.6408	23.7303	7.90543	7.47325
ENSMUSG00000019124.10	Scrn1	267.247	-1.86176	0.287177	-6.48295	8.99e-11	1.39e-08	6.50105	5.13488	1.4736	1.45427
ENSMUSG00000051323.16	Pcdh19	276.858	-2.14726	0.331214	-6.48301	8.99e-11	1.39e-08	3.4344	2.89267	0.816501	0.50437
ENSMUSG00000061684.5	Rpl21-ps8	1576.16	1.08509	0.167354	6.48381	8.94e-11	1.39e-08	135.047	136.934	278.602	253.632
ENSMUSG00000024868.8	Dkk1	396.986	-2.26954	0.35102	-6.46558	1.01e-10	1.53e-08	21.5995	13.5305	4.13522	2.53043
ENSMUSG00000050321.2	Neto1	133.307	2.52128	0.389954	6.46558	1.01e-10	1.53e-08	0.673933	0.74348	3.81958	3.82307
ENSMUSG00000031144.15	Syp	296.905	-2.34755	0.36363	-6.45589	1.08e-10	1.62e-08	13.6711	16.3996	3.53259	1.95356
ENSMUSG00000028337.14	Coro2a	329.975	-1.64164	0.254726	-6.44475	1.16e-10	1.73e-08	9.12033	8.32237	2.49755	2.64188
ENSMUSG00000041073.10	Nacad	149.836	-2.27381	0.353047	-6.44055	1.19e-10	1.76e-08	3.44577	3.10446	0.653227	0.590272
ENSMUSG00000067242.11	Lgi1	93.8835	-4.55297	0.708687	-6.42451	1.32e-10	1.94e-08	2.68385	0.971957	0.101519	0.042013
ENSMUSG00000022449.14	Adamts20	463.304	3.08881	0.482037	6.40784	1.48e-10	2.15e-08	0.989316	1.04583	12.2457	3.94957
ENSMUSG00000026833.18	Olfm1	1331.67	-1.39427	0.21785	-6.40011	1.55e-10	2.24e-08	58.9066	50.2337	22.1951	16.0548
ENSMUSG00000094526.1	Gm21451	1213.63	-1.34218	0.209756	-6.39876	1.57e-10	2.25e-08	41.654	39.2229	16.9288	12.4984
ENSMUSG00000068036.14	Mllt4	3509.43	1.08177	0.169288	6.39012	1.66e-10	2.36e-08	46.8005	37.5106	85.7493	77.8777
ENSMUSG00000053965.10	Pde5a	1917.94	0.995417	0.156127	6.37569	1.82e-10	2.57e-08	11.8947	11.1968	21.4953	20.8625
ENSMUSG00000018169.12	Mfng	550.429	-1.58904	0.250364	-6.3469	2.2e-10	3.08e-08	28.8362	32.302	10.7598	8.06966
ENSMUSG00000035493.9	Tgfbi	3395.71	-1.281	0.201896	-6.34483	2.23e-10	3.09e-08	136.154	96.4238	43.5053	44.0942
ENSMUSG00000046743.6	Fat4	2286.52	1.17156	0.184959	6.33418	2.39e-10	3.29e-08	5.50887	6.02718	11.2999	12.6593
ENSMUSG00000013646.17	Sh3bp5l	888	-1.17175	0.185099	-6.3304	2.45e-10	3.34e-08	19.0539	17.7411	7.9022	7.13182
ENSMUSG00000023484.13	Prph	317.714	-1.92394	0.304428	-6.31986	2.62e-10	3.55e-08	15.3698	20.5766	4.58195	4.19575
ENSMUSG00000041556.8	Fbxo2	107.031	-3.28067	0.522291	-6.2813	3.36e-10	4.52e-08	9.31536	10.0964	1.30222	0.54257
ENSMUSG00000059970.6	Hspa2	331.905	-1.69966	0.270779	-6.27694	3.45e-10	4.62e-08	12.162	13.7255	3.51938	3.85514
ENSMUSG00000037335.13	Hand1	359.856	1.61824	0.258365	6.26338	3.77e-10	5e-08	6.67125	5.41698	18.0787	15.7787
ENSMUSG00000022894.5	Adamts5	210.005	-1.95269	0.311878	-6.26106	3.82e-10	5.04e-08	2.89463	2.4382	0.595982	0.661639
ENSMUSG00000034205.16	Loxl2	5540.67	-1.24246	0.198981	-6.24411	4.26e-10	5.57e-08	101.202	87.9238	42.9482	30.7423
ENSMUSG00000006575.14	Rundc3a	213.989	-1.99233	0.319218	-6.2413	4.34e-10	5.63e-08	20.0361	16.5972	4.77383	3.70241
ENSMUSG00000000805.18	Car4	249.287	3.46668	0.556169	6.23314	4.57e-10	5.89e-08	1.6262	2.56114	33.3953	10.9007
ENSMUSG00000020135.13	Apc2	263.898	-1.80062	0.289534	-6.21901	5e-10	6.4e-08	3.48715	3.1087	0.98185	0.76149
ENSMUSG00000026923.15	Notch1	1906.46	-1.08438	0.174572	-6.21164	5.24e-10	6.66e-08	21.6543	20.8655	10.1611	8.32191
ENSMUSG00000023078.6	Cxcl13	289.518	3.28345	0.528717	6.21021	5.29e-10	6.67e-08	1.56546	4.21682	37.1408	17.5728
ENSMUSG00000037235.13	Mxd4	3382.14	-0.911713	0.146977	-6.20311	5.54e-10	6.93e-08	79.4084	71.6811	37.308	36.5167
ENSMUSG00000027071.14	P2rx3	204.887	-2.25782	0.365184	-6.1827	6.3e-10	7.83e-08	11.4651	15.415	3.00399	2.21823
ENSMUSG00000033191.14	Tie1	1834.6	-1.0963	0.177747	-6.16777	6.93e-10	8.55e-08	38.8886	43.1913	18.517	16.9448
ENSMUSG00000033706.13	Smyd5	1291.03	1.06326	0.172577	6.16107	7.23e-10	8.86e-08	27.0098	25.5906	53.4739	47.7453
ENSMUSG00000001496.15	Nkx2-1	423.591	1.94323	0.315802	6.15332	7.59e-10	9.2e-08	6.16205	3.60736	15.9204	17.8994
ENSMUSG00000028078.14	Dclk2	559.833	-1.32025	0.214571	-6.15299	7.6e-10	9.2e-08	10.0607	10.1357	4.00043	3.46399
ENSMUSG00000000392.17	Fap	298.738	-2.34749	0.381764	-6.14907	7.79e-10	9.36e-08	17.0814	8.88303	2.12735	2.49838
ENSMUSG00000014704.10	Hoxa2	1330.79	-1.1411	0.185728	-6.14392	8.05e-10	9.61e-08	73.1862	60.1049	27.195	28.2255
ENSMUSG00000043079.17	Synpo	1165.82	-1.24976	0.203794	-6.13249	8.65e-10	1.03e-07	24.4113	18.6473	8.75733	7.83916
ENSMUSG00000044365.15	Cxxc4	1196.65	1.58498	0.2585	6.13146	8.71e-10	1.03e-07	5.82888	8.64859	20.607	19.8155
ENSMUSG00000106995.1	Gm42712	157.375	-2.42321	0.396874	-6.10575	1.02e-09	1.2e-07	5.98846	6.9001	1.36807	0.858688
ENSMUSG00000048138.9	Dmrt2	212.804	-2.32686	0.381938	-6.09224	1.11e-09	1.29e-07	12.4129	7.20416	1.93302	1.62675
ENSMUSG00000028546.17	Elavl4	961.745	-1.1626	0.190871	-6.091	1.12e-09	1.3e-07	21.0504	22.6044	9.40838	8.60349
ENSMUSG00000039860.19	Srrm3	57.9359	-4.32336	0.710181	-6.08769	1.15e-09	1.31e-07	2.55481	3.61553	0.112394	0.153929
ENSMUSG00000024011.16	Pi16	119.035	-2.68625	0.441639	-6.08244	1.18e-09	1.35e-07	5.29962	4.31392	0.544894	0.831941
ENSMUSG00000031530.6	Dusp4	684.34	-1.19421	0.196737	-6.07012	1.28e-09	1.45e-07	23.3438	21.4949	9.40613	8.61976
ENSMUSG00000027559.5	Car3	167.171	-2.16145	0.357781	-6.04128	1.53e-09	1.72e-07	12.8057	9.27454	2.32437	2.18611
ENSMUSG00000026766.16	Mmadhc	1800.77	0.966119	0.160254	6.02869	1.65e-09	1.85e-07	68.4699	66.6269	121.421	121.635
ENSMUSG00000018196.18	Glrx2	727.193	-1.3104	0.218089	-6.00857	1.87e-09	2.08e-07	35.9038	27.5895	11.7219	11.6858
ENSMUSG00000030257.16	Srgap3	645.044	-1.43614	0.239901	-5.98638	2.15e-09	2.37e-07	8.47775	6.34966	2.36741	2.64131
ENSMUSG00000020241.13	Col6a2	676.6	-1.18376	0.198207	-5.97234	2.34e-09	2.57e-07	15.6983	14.3029	6.35021	5.79903
ENSMUSG00000039683.16	Sdk1	260.4	-1.80893	0.303534	-5.95955	2.53e-09	2.76e-07	2.54779	2.82488	0.809192	0.609192
ENSMUSG00000000184.12	Ccnd2	20894.6	0.831687	0.140441	5.92197	3.18e-09	3.45e-07	165.331	155.568	256.032	268.962
ENSMUSG00000021803.9	Cdhr1	248.864	-3.81273	0.644201	-5.91854	3.25e-09	3.5e-07	8.45681	5.5366	0.791983	0.128923
ENSMUSG00000028785.12	Hpca	133.052	-2.46233	0.416113	-5.91747	3.27e-09	3.5e-07	9.41486	7.96103	1.78965	1.09284
ENSMUSG00000042631.7	Xkr7	75.3205	-3.29494	0.557228	-5.9131	3.36e-09	3.57e-07	3.48902	3.02913	0.402239	0.196024
ENSMUSG00000021604.15	Irx4	60.382	-4.33684	0.73375	-5.91051	3.41e-09	3.61e-07	3.962	1.82148	0.162774	0.096276
ENSMUSG00000037239.7	Spred3	588.982	-1.53381	0.260105	-5.89686	3.7e-09	3.87e-07	16.3319	13.0193	5.46546	3.85947
ENSMUSG00000037902.18	Sirpa	759.313	-1.18362	0.200699	-5.89748	3.69e-09	3.87e-07	22.959	19.7939	9.21776	8.07384
ENSMUSG00000048385.8	Scrt1	91.7816	-2.89285	0.491623	-5.88429	4e-09	4.16e-07	2.86435	2.34335	0.40706	0.237817
ENSMUSG00000037625.7	Cldn11	626.399	2.19912	0.375704	5.85334	4.82e-09	4.98e-07	5.15323	9.99275	27.0905	38.0085
ENSMUSG00000033726.8	Emx1	94.8326	-3.40255	0.581947	-5.84684	5.01e-09	5.15e-07	8.90874	6.36758	0.982757	0.355815
ENSMUSG00000005672.12	Kit	1372.74	-1.28971	0.221239	-5.82947	5.56e-09	5.68e-07	46.6121	35.3003	17.4018	13.3899
ENSMUSG00000053475.5	Tnfaip6	238.724	-1.84004	0.315691	-5.82859	5.59e-09	5.68e-07	16.493	11.8122	3.77884	3.42174
ENSMUSG00000036856.4	Wnt4	652.621	1.31066	0.225198	5.82002	5.88e-09	5.93e-07	5.58861	5.89215	14.6644	11.7111
ENSMUSG00000039542.15	Ncam1	1210.25	-1.46961	0.25258	-5.81841	5.94e-09	5.93e-07	16.9311	24.1564	7.24548	6.51043
ENSMUSG00000078861.8	Zfp931	271.341	2.05179	0.352614	5.8188	5.93e-09	5.93e-07	7.62731	4.37126	20.6959	23.8665
ENSMUSG00000035597.18	Prpf39	4052.26	0.988058	0.170374	5.79935	6.66e-09	6.61e-07	40.8261	43.936	73.9001	80.9601
ENSMUSG00000063354.6	Slc39a4	171.356	3.61488	0.623732	5.79556	6.81e-09	6.73e-07	0.916992	0.604384	13.2958	3.79185
ENSMUSG00000024754.12	Tmem2	6746.11	-0.855618	0.147675	-5.79391	6.88e-09	6.75e-07	90.9663	79.1513	45.5026	40.9515
ENSMUSG00000028072.6	Ntrk1	140.506	-2.35598	0.406694	-5.793	6.91e-09	6.75e-07	5.06072	6.58069	1.22401	0.889635
ENSMUSG00000025790.14	Slco3a1	850.738	-1.25471	0.216708	-5.78987	7.04e-09	6.84e-07	22.2445	17.8609	8.54149	6.90554
ENSMUSG00000035551.6	Igfbpl1	541.927	-1.73833	0.300563	-5.78358	7.31e-09	7.07e-07	20.851	20.4899	7.25123	4.20829
ENSMUSG00000056947.5	Mab21l1	682.833	-1.57859	0.273127	-5.77968	7.48e-09	7.19e-07	30.1474	22.9667	9.81912	6.52017
ENSMUSG00000034161.7	Scx	352.661	-1.87581	0.325415	-5.76436	8.2e-09	7.83e-07	34.8305	28.2562	9.91914	5.89327
ENSMUSG00000081483.1	Gm12445	52.6148	8.95859	1.55483	5.76178	8.32e-09	7.91e-07	0	0	7.09649	7.01454
ENSMUSG00000029106.14	Add1	2937.52	-1.32252	0.229693	-5.75779	8.52e-09	8.06e-07	154.7	149.231	68.2867	44.1598
ENSMUSG00000022114.4	Spry2	1390	-1.24926	0.217169	-5.75247	8.79e-09	8.23e-07	63.1175	57.9097	27.4819	19.5041
ENSMUSG00000025969.15	Nrp2	3593.97	-0.847984	0.147411	-5.75253	8.79e-09	8.23e-07	49.3929	45.5355	24.0532	24.426
ENSMUSG00000057894.10	Zfp329	1243.75	1.4884	0.260406	5.7157	1.09e-08	1.02e-06	7.55956	5.06548	14.1837	18.0289
ENSMUSG00000025400.10	Tac2	49.4816	-9.28377	1.62962	-5.69688	1.22e-08	1.13e-06	4.22418	10.498	0	0
ENSMUSG00000026890.19	Lhx6	230.35	-1.69197	0.29728	-5.69151	1.26e-08	1.16e-06	6.8788	7.30869	1.93815	2.11257
ENSMUSG00000094344.1	Gm11942	3246.15	0.850494	0.149666	5.68259	1.33e-08	1.22e-06	432.844	431.822	750.386	686.662
ENSMUSG00000039910.9	Cited2	1960.76	-1.20488	0.212408	-5.67247	1.41e-08	1.28e-06	96.9168	82.5556	41.8011	29.9239
ENSMUSG00000046807.9	Lrrc75b	136.194	-2.22496	0.39227	-5.672	1.41e-08	1.28e-06	3.66875	2.64687	0.674127	0.558087
ENSMUSG00000021194.5	Chga	91.9201	-2.5442	0.450021	-5.65352	1.57e-08	1.42e-06	5.16801	5.58404	0.803883	0.880729
ENSMUSG00000018932.9	Map2k3	953.762	-1.20053	0.212719	-5.64372	1.66e-08	1.49e-06	50.0618	38.5782	19.0811	16.31
ENSMUSG00000030768.12	Disp1	855.204	-1.21423	0.215156	-5.64348	1.67e-08	1.49e-06	18.0008	14.1364	6.91679	5.79108
ENSMUSG00000105987.4	AI506816	1153.69	-1.15492	0.204976	-5.6344	1.76e-08	1.56e-06	47.8318	55.8326	22.9664	20.0955
ENSMUSG00000036596.6	Cpz	115.691	-2.31262	0.4109	-5.62819	1.82e-08	1.61e-06	6.05315	5.04194	0.907971	1.13207
ENSMUSG00000079658.9	Tceb1	3163.63	1.59407	0.283831	5.61626	1.95e-08	1.72e-06	105.145	86.1639	195.846	331.338
ENSMUSG00000028681.11	Ptch2	201.859	2.30329	0.410463	5.61143	2.01e-08	1.76e-06	0.977232	1.76305	7.24681	5.57987
ENSMUSG00000002289.15	Angptl4	494.816	-1.23479	0.220201	-5.60756	2.05e-08	1.79e-06	15.9313	16.4206	6.33329	6.34551
ENSMUSG00000008489.18	Elavl2	1052.06	-1.00028	0.178468	-5.60483	2.08e-08	1.81e-06	26.4066	24.0322	12.2071	10.9987
ENSMUSG00000100241.1	Slc18a3	108.347	-2.36318	0.422711	-5.59052	2.26e-08	1.95e-06	5.17889	4.50693	1.00102	0.73128
ENSMUSG00000021614.16	Vcan	17554	1.47002	0.263442	5.58006	2.4e-08	2.06e-06	72.839	47.8071	125.071	179.591
ENSMUSG00000031119.4	Gpc4	953.391	-1.3332	0.239609	-5.56407	2.64e-08	2.25e-06	39.8016	26.9104	12.5102	11.6872
ENSMUSG00000002633.4	Shh	1029.42	1.76223	0.317323	5.55343	2.8e-08	2.38e-06	10.4031	10.7717	23.7122	42.1258
ENSMUSG00000046546.3	Fam43a	582.604	-1.18702	0.213838	-5.55102	2.84e-08	2.4e-06	17.2131	16.7334	7.45221	6.29064
ENSMUSG00000029661.16	Col1a2	13540.3	-0.857359	0.154593	-5.54589	2.92e-08	2.46e-06	237.37	210.383	124.008	103.53
ENSMUSG00000056812.13	St8sia3	129.066	-3.21424	0.579715	-5.54452	2.95e-08	2.47e-06	4.53613	1.71786	0.38361	0.215734
ENSMUSG00000044349.15	Snhg11	397.668	-1.40943	0.254635	-5.5351	3.11e-08	2.6e-06	7.08737	6.69189	2.71385	2.07565
ENSMUSG00000018634.10	Crhr1	36.6487	-8.83763	1.60298	-5.51324	3.52e-08	2.93e-06	2.10749	1.75293	0	0
ENSMUSG00000038591.3	Colec10	61.0558	6.89671	1.2511	5.5125	3.54e-08	2.93e-06	0	0.021001	0.952113	2.1536
ENSMUSG00000021357.13	Exoc2	2378.13	1.00359	0.182187	5.50855	3.62e-08	2.98e-06	23.0666	23.8442	40.2546	46.28
ENSMUSG00000034648.9	Lrrn1	1506.16	-0.934705	0.170278	-5.48928	4.04e-08	3.31e-06	37.1752	31.8407	16.856	16.2889
ENSMUSG00000042354.6	Gnl3	4286.77	0.833833	0.151993	5.48599	4.11e-08	3.35e-06	105.59	105.196	168.623	177.078
ENSMUSG00000021281.15	Tnfaip2	175.053	-1.97033	0.359462	-5.48133	4.22e-08	3.43e-06	12.2023	9.6824	2.99013	2.08196
ENSMUSG00000015579.4	Nkx2-5	268.893	1.71114	0.312343	5.47839	4.29e-08	3.47e-06	5.96926	4.73426	18.4749	13.6013
ENSMUSG00000024347.16	Psd2	78.3717	-2.96143	0.540903	-5.47497	4.38e-08	3.49e-06	2.56459	1.58306	0.281451	0.19699
ENSMUSG00000063919.10	Srrm4	238.716	-1.75685	0.320882	-5.47508	4.37e-08	3.49e-06	4.6246	3.44897	1.23561	0.953226
ENSMUSG00000104861.1	RP24-490H13.4	98.7533	3.50448	0.640023	5.47555	4.36e-08	3.49e-06	0.383784	1.76312	11.5343	13.3777
ENSMUSG00000044533.15	Rps2	5098.19	-0.862259	0.157528	-5.47367	4.41e-08	3.5e-06	444.982	482.697	245.296	225.577
ENSMUSG00000032473.13	Cldn18	45.229	8.74036	1.60007	5.46249	4.69e-08	3.71e-06	0	0	0.943621	1.60582
ENSMUSG00000063415.12	Cyp26b1	893.112	-1.42924	0.261814	-5.45899	4.79e-08	3.77e-06	22.7494	15.2274	7.32974	5.58627
ENSMUSG00000031891.5	Hsd11b2	2009.82	1.28353	0.235196	5.4573	4.83e-08	3.79e-06	34.2798	46.9504	100.622	83.0329
ENSMUSG00000038393.14	Txnip	2620.38	-1.04298	0.192131	-5.42851	5.68e-08	4.43e-06	90.8499	84.3259	44.9356	33.4878
ENSMUSG00000001120.15	Pcbp3	627.173	-1.09518	0.201824	-5.42639	5.75e-08	4.46e-06	32.6393	29.311	13.7245	12.9084
ENSMUSG00000022687.11	Boc	1226.48	-0.959817	0.177234	-5.41555	6.11e-08	4.72e-06	23.7744	23.3579	11.9833	10.3672
ENSMUSG00000028626.5	Col9a2	877.863	-1.49646	0.276505	-5.41207	6.23e-08	4.79e-06	37.0533	23.943	11.4348	8.37439
ENSMUSG00000032511.17	Scn5a	170.85	-2.34004	0.433466	-5.39843	6.72e-08	5.15e-06	2.88698	1.50383	0.436459	0.354105
ENSMUSG00000028729.15	Ebna1bp2	3211.36	0.804453	0.149137	5.39405	6.89e-08	5.23e-06	74.6515	69.6559	122.147	109.855
ENSMUSG00000070643.11	Sox13	1038.65	-1.07525	0.199328	-5.3944	6.88e-08	5.23e-06	38.0733	31.9794	16.7464	13.8046
ENSMUSG00000022421.18	Nptxr	145.352	-1.97654	0.366853	-5.38784	7.13e-08	5.38e-06	2.95547	3.03639	0.796133	0.604899
ENSMUSG00000040717.5	Il17rd	2524.29	-1.07409	0.199367	-5.38749	7.14e-08	5.38e-06	27.6848	26.0004	13.6298	9.90388
ENSMUSG00000063063.12	Ctnna2	461.699	-1.43297	0.266754	-5.37186	7.79e-08	5.85e-06	10.3581	13.4453	4.16006	4.0254
ENSMUSG00000089901.1	Gm8113	413.254	1.60139	0.298302	5.36836	7.95e-08	5.93e-06	5.41308	4.3494	11.3226	15.6397
ENSMUSG00000031970.16	Dbndd1	213.818	-1.64475	0.307388	-5.35073	8.76e-08	6.52e-06	15.001	13.7349	4.7107	3.76315
ENSMUSG00000029603.15	Dtx1	131.662	-1.98239	0.370664	-5.3482	8.88e-08	6.58e-06	4.6675	5.18729	1.23262	1.08025
ENSMUSG00000025932.14	Eya1	1523.24	-1.03339	0.194052	-5.3253	1.01e-07	7.41e-06	42.5318	32.5012	17.3747	16.2429
ENSMUSG00000041911.3	Dlx1	460.909	-1.65027	0.309895	-5.32526	1.01e-07	7.41e-06	19.717	19.0331	7.245	4.19989
ENSMUSG00000056306.5	Sertm1	225.708	-2.75702	0.51848	-5.31751	1.05e-07	7.7e-06	12.6612	4.52009	0.936903	1.33907
ENSMUSG00000026586.16	Prrx1	9153.24	-1.03626	0.195026	-5.31341	1.08e-07	7.84e-06	177.795	128.557	65.5891	71.1469
ENSMUSG00000050505.7	Pcdh20	107.289	-2.40456	0.452869	-5.30961	1.1e-07	7.97e-06	2.73381	1.73033	0.389581	0.373812
ENSMUSG00000092541.7	Gm20537	35.3756	-8.78126	1.65508	-5.30563	1.12e-07	8.11e-06	10.3105	4.51931	0	0
ENSMUSG00000037579.6	Kcnh3	42.4544	-9.0398	1.7058	-5.29944	1.16e-07	8.36e-06	2.50289	0.587724	0	0
ENSMUSG00000020598.15	Nrcam	419.693	1.7714	0.334886	5.28956	1.23e-07	8.79e-06	1.2002	2.04427	5.01668	5.3721
ENSMUSG00000028469.15	Npr2	850.326	-1.41471	0.267694	-5.28482	1.26e-07	8.98e-06	39.4926	29.0644	14.1596	9.49274
ENSMUSG00000020061.17	Mybpc1	499.714	-2.06884	0.391597	-5.28309	1.27e-07	9.03e-06	33.6777	20.7074	8.05438	3.8861
ENSMUSG00000029167.13	Ppargc1a	212.38	1.89429	0.359529	5.26881	1.37e-07	9.72e-06	0.857857	0.927482	2.54326	3.58881
ENSMUSG00000033943.15	Mga	4924.76	1.01802	0.19372	5.25515	1.48e-07	1.04e-05	34.7075	29.0689	53.0345	65.2601
ENSMUSG00000001750.15	Tcirg1	985.201	-1.23249	0.235367	-5.23643	1.64e-07	1.15e-05	65.1488	45.2008	23.1056	19.8241
ENSMUSG00000060568.14	Fam78b	316.791	-1.39183	0.265817	-5.23604	1.64e-07	1.15e-05	8.46819	8.66466	2.82711	3.18758
ENSMUSG00000034009.14	Rxfp1	187.072	2.36205	0.451589	5.23053	1.69e-07	1.18e-05	0.527979	1.06695	3.38656	4.3564
ENSMUSG00000000247.11	Lhx2	52.6362	-3.93854	0.753828	-5.22473	1.74e-07	1.21e-05	3.75409	1.47255	0.18499	0.123271
ENSMUSG00000084910.1	C630043F03Rik	410.032	1.81706	0.348	5.22144	1.78e-07	1.23e-05	3.56575	5.34896	12.0582	17.2292
ENSMUSG00000023232.17	Serinc2	806.43	-1.06279	0.20414	-5.20618	1.93e-07	1.32e-05	43.9663	35.7177	17.2736	17.685
ENSMUSG00000048120.16	Entpd1	372.251	-1.42772	0.274209	-5.20669	1.92e-07	1.32e-05	12.6294	12.4998	3.79174	4.85342
ENSMUSG00000068614.7	Actc1	1509.91	-1.2015	0.23086	-5.20442	1.95e-07	1.33e-05	83.6341	99.9209	32.5871	40.9615
ENSMUSG00000031748.15	Gnao1	258.323	-1.8008	0.346573	-5.19603	2.04e-07	1.39e-05	11.6726	11.3183	3.86818	2.24875
ENSMUSG00000055737.12	Ghr	1809.77	0.956139	0.184244	5.18954	2.11e-07	1.43e-05	26.3276	29.7455	49.2149	51.2064
ENSMUSG00000033544.6	Angptl1	467.669	1.68145	0.324061	5.18868	2.12e-07	1.43e-05	5.35477	7.96152	17.0607	22.5733
ENSMUSG00000021062.15	Rab15	838.958	-1.12393	0.216952	-5.18054	2.21e-07	1.49e-05	28.5927	21.459	10.6928	10.3208
ENSMUSG00000079466.2	Prdm12	29.2317	-8.51801	1.64445	-5.17985	2.22e-07	1.49e-05	1.38072	1.65685	0	0
ENSMUSG00000044186.10	Nkx2-6	734.936	-1.94108	0.37505	-5.17554	2.27e-07	1.52e-05	79.1715	53.9702	22.0336	9.96867
ENSMUSG00000042988.10	Notum	128.808	-1.96222	0.379466	-5.171	2.33e-07	1.55e-05	6.87569	6.14757	1.74487	1.35014
ENSMUSG00000028456.17	Unc13b	918.652	-0.945825	0.183604	-5.15143	2.59e-07	1.71e-05	22.0521	20.3909	10.7234	9.56338
ENSMUSG00000022817.14	Itgb5	2542.48	-0.796902	0.154741	-5.1499	2.61e-07	1.72e-05	72.3695	63.828	37.3942	34.6638
ENSMUSG00000017737.2	Mmp9	81.329	-3.60173	0.699758	-5.14711	2.65e-07	1.74e-05	4.07944	2.82113	0.433413	0.094504
ENSMUSG00000032085.4	Tagln	4285.96	-0.769323	0.149541	-5.14456	2.68e-07	1.76e-05	231.529	207.931	116.441	120.414
ENSMUSG00000042078.14	Svop	40.2313	-4.05952	0.79003	-5.13843	2.77e-07	1.81e-05	1.64616	1.40283	0.124094	0.044033
ENSMUSG00000060257.2	Scrt2	52.8714	-3.40944	0.664929	-5.12753	2.94e-07	1.91e-05	1.60776	2.04619	0.213297	0.10411
ENSMUSG00000020183.11	Cpm	2591.53	-0.802789	0.156702	-5.12303	3.01e-07	1.95e-05	43.7584	43.2557	24.4474	21.5232
ENSMUSG00000021469.9	Msx2	472.9	-1.81474	0.35425	-5.12275	3.01e-07	1.95e-05	25.6926	14.0899	6.20382	4.14445
ENSMUSG00000025366.7	Esyt1	1434.28	-0.957641	0.187183	-5.11606	3.12e-07	2.01e-05	36.0267	30.3171	17.1358	14.264
ENSMUSG00000024900.4	Cpt1a	768.236	-1.33941	0.262436	-5.10375	3.33e-07	2.13e-05	20.2748	12.935	6.16669	5.82045
ENSMUSG00000035158.15	Mitf	212.373	-1.51432	0.296712	-5.10366	3.33e-07	2.13e-05	4.46425	3.99886	1.4219	1.3085
ENSMUSG00000038335.13	Tsr1	2609.67	0.946041	0.186212	5.08045	3.77e-07	2.39e-05	41.4376	48.9336	84.8627	76.2219
ENSMUSG00000100157.6	2310034O05Rik	40.5716	8.58323	1.68932	5.08089	3.76e-07	2.39e-05	0	0	6.98606	1.97616
ENSMUSG00000026399.12	Cd55	546.796	1.54138	0.303718	5.07505	3.87e-07	2.45e-05	8.89523	9.67333	19.7457	29.9667
ENSMUSG00000034463.3	Scara3	710.366	1.00117	0.197714	5.06376	4.11e-07	2.58e-05	8.91925	8.97739	17.248	15.7917
ENSMUSG00000042115.4	Klhdc8a	76.8416	-3.00996	0.594367	-5.06414	4.1e-07	2.58e-05	2.21817	1.91881	0.343206	0.129003
ENSMUSG00000049281.15	Scn3b	203.501	-1.75616	0.347324	-5.05625	4.28e-07	2.68e-05	5.0263	6.63266	1.62738	1.58298
ENSMUSG00000051243.13	Islr2	65.1948	-2.79212	0.552374	-5.05475	4.31e-07	2.69e-05	1.47239	1.91276	0.256595	0.198391
ENSMUSG00000046999.2	1110032F04Rik	264.189	-1.49415	0.295747	-5.05212	4.37e-07	2.72e-05	9.11079	10.3328	3.55453	2.84174
ENSMUSG00000040405.13	Havcr1	31.5801	8.222	1.628	5.05036	4.41e-07	2.73e-05	0	0	2.23102	1.67004
ENSMUSG00000032394.5	Igdcc3	6316.22	-1.02053	0.202448	-5.04096	4.63e-07	2.86e-05	194.201	151.296	89.7892	66.8969
ENSMUSG00000017754.13	Pltp	440.561	1.15867	0.229934	5.03914	4.68e-07	2.88e-05	8.07906	7.99662	16.2872	16.8224
ENSMUSG00000038855.10	Itpkb	1198.23	-1.11393	0.22129	-5.03382	4.81e-07	2.94e-05	19.689	14.6082	8.05675	6.48065
ENSMUSG00000053693.16	Mast1	70.9664	-2.64253	0.524979	-5.03359	4.81e-07	2.94e-05	1.60343	1.65421	0.193139	0.278269
ENSMUSG00000027907.4	S100a11	881.928	-1.11205	0.22104	-5.03098	4.88e-07	2.97e-05	166.562	138.306	58.6784	70.4511
ENSMUSG00000063430.9	Wscd2	102.672	-2.12154	0.421861	-5.029	4.93e-07	2.99e-05	2.8019	2.25588	0.571624	0.480579
ENSMUSG00000060402.7	Chst8	140.447	-1.81565	0.361239	-5.02618	5e-07	3.03e-05	5.67795	6.21598	1.58639	1.52587
ENSMUSG00000023022.13	Lima1	3902.69	-0.788026	0.15689	-5.0228	5.09e-07	3.07e-05	83.1277	75.0071	45.5338	38.7852
ENSMUSG00000039257.11	Vstm2b	110.398	-1.97395	0.393044	-5.02221	5.11e-07	3.07e-05	5.06451	4.81956	1.20519	1.12341
ENSMUSG00000089645.3	Gm5766	32.3733	-5.09291	1.01454	-5.01993	5.17e-07	3.09e-05	5.3989	4.20571	0.169835	0.086115
ENSMUSG00000019785.13	Clvs2	45.1986	3.76392	0.751599	5.00788	5.5e-07	3.27e-05	0.209752	0.106366	1.61803	2.05682
ENSMUSG00000079022.9	Col22a1	396.196	1.39314	0.278154	5.00852	5.49e-07	3.27e-05	1.55947	2.01939	4.18276	4.57278
ENSMUSG00000048387.7	Osr1	1104.75	1.6785	0.335826	4.99811	5.79e-07	3.43e-05	11.537	21.7895	56.3951	43.3232
ENSMUSG00000028212.16	Ccne2	2214.41	0.942342	0.189041	4.98485	6.2e-07	3.65e-05	35.2999	34.9997	56.5913	67.5418
ENSMUSG00000044033.16	Ccdc141	759.307	0.953606	0.191304	4.98477	6.2e-07	3.65e-05	7.44594	6.77086	12.9448	12.3521
ENSMUSG00000063052.9	Lrrc40	2695.69	0.881273	0.17707	4.97697	6.46e-07	3.79e-05	34.7453	37.3405	67.1581	55.5686
ENSMUSG00000075270.11	Pde11a	150.546	-1.9079	0.3835	-4.97497	6.53e-07	3.82e-05	6.23312	7.4011	1.46019	1.89045
ENSMUSG00000036782.13	Klhl13	2537.32	0.796728	0.160634	4.95991	7.05e-07	4.11e-05	42.6871	45.3428	71.9306	69.2319
ENSMUSG00000033016.15		202.716	-1.66469	0.335694	-4.95894	7.09e-07	4.12e-05	4.92538	3.70113	1.12975	1.35274
ENSMUSG00000034771.15	Tle2	296.775	-1.6177	0.32632	-4.95739	7.14e-07	4.14e-05	17.8577	14.9312	3.96488	5.83495
ENSMUSG00000027221.5	Chst1	159.921	-1.75056	0.353292	-4.95498	7.23e-07	4.18e-05	6.82172	5.10822	1.69688	1.54595
ENSMUSG00000059481.4	Plg	200.783	23.6843	4.78497	4.94972	7.43e-07	4.28e-05	0	0	17.672	0
ENSMUSG00000066366.14	Serpina1a	85.7932	3.30674	0.668321	4.94783	7.5e-07	4.3e-05	0.395069	0.958525	8.71155	4.05435
ENSMUSG00000085399.7	Foxd2os	158.732	1.97048	0.398735	4.94181	7.74e-07	4.42e-05	1.51391	2.20252	6.09796	7.5172
ENSMUSG00000045136.5	Tubb2b	7820.94	-0.697971	0.141451	-4.93438	8.04e-07	4.58e-05	320.698	327.663	189.019	179.249
ENSMUSG00000000385.7	Tmprss2	472.678	1.9037	0.386063	4.93105	8.18e-07	4.63e-05	4.52228	3.65262	19.3663	8.84991
ENSMUSG00000052854.15	Nrk	1293.87	1.35689	0.275155	4.93137	8.17e-07	4.63e-05	7.06141	6.44903	20.2054	11.771
ENSMUSG00000034595.17	Ppp1r18	1903.39	-0.823612	0.167445	-4.9187	8.71e-07	4.92e-05	54.8579	46.3324	27.2787	25.244
ENSMUSG00000083773.4	Gm13394	7379.6	0.971056	0.197461	4.91771	8.76e-07	4.93e-05	284.852	355.265	553.986	604.173
ENSMUSG00000074115.3	Saa1	50.5664	3.19507	0.650413	4.91238	9e-07	5.05e-05	1.30369	0.873621	8.40333	9.38122
ENSMUSG00000038126.17	Mphosph9	1617.62	0.881649	0.179546	4.91045	9.09e-07	5.08e-05	18.8167	15.7857	28.3234	30.0712
ENSMUSG00000067608.4	Pcna-ps2	4943.94	0.711506	0.145079	4.90425	9.38e-07	5.23e-05	191.17	192.933	290.191	289.016
ENSMUSG00000108555.1	RP23-137A24.3	72.8671	-4.13261	0.842811	-4.90336	9.42e-07	5.23e-05	3.14476	1.43506	0.026932	0.205442
ENSMUSG00000046318.15	Ccbe1	207.142	-1.85579	0.378678	-4.90072	9.55e-07	5.29e-05	3.52311	4.45702	1.27149	0.781081
ENSMUSG00000022404.7	Slc25a17	2229.42	0.886677	0.181033	4.89788	9.69e-07	5.35e-05	62.8803	58.1881	95.1578	110.353
ENSMUSG00000028405.9	Aco1	4130.2	0.748391	0.153228	4.88417	1.04e-06	5.72e-05	52.8421	53.7181	80.6915	84.1141
ENSMUSG00000025085.16	Ablim1	559.185	1.89984	0.389053	4.88326	1.04e-06	5.73e-05	3.58178	5.88948	11.8997	20.7679
ENSMUSG00000042751.14	Nmnat2	137.856	-2.18896	0.448519	-4.88042	1.06e-06	5.79e-05	2.47198	3.89175	0.76793	0.534114
ENSMUSG00000020566.18	Atp6v1c2	44.0334	-3.36395	0.689391	-4.8796	1.06e-06	5.8e-05	2.98255	3.5872	0.364839	0.223557
ENSMUSG00000066258.13	Trim12a	35.0916	-4.56365	0.935662	-4.87745	1.07e-06	5.84e-05	3.07422	1.31147	0.064229	0.10488
ENSMUSG00000086825.1	Gm15675	117.715	2.25522	0.463074	4.87011	1.12e-06	6.05e-05	0.893005	0.556569	2.62533	3.61344
ENSMUSG00000028444.17	Cntfr	1185.55	-1.00491	0.206783	-4.85973	1.18e-06	6.35e-05	56.5443	49.0795	27.52	20.9698
ENSMUSG00000028137.9	Celf3	218.294	-1.5579	0.320771	-4.85672	1.19e-06	6.43e-05	8.68021	6.53261	2.21247	2.49783
ENSMUSG00000023055.9	Calcoco1	1652.78	-0.920454	0.189616	-4.85429	1.21e-06	6.49e-05	58.6379	45.2031	25.8535	24.4389
ENSMUSG00000054863.8	Fam19a5	336.938	-1.37301	0.283075	-4.85034	1.23e-06	6.59e-05	12.0261	12.2685	5.07153	3.60023
ENSMUSG00000105816.4	D030025E07Rik	194.715	3.22914	0.665782	4.85016	1.23e-06	6.59e-05	0.337593	2.16251	11.6639	11.0959
ENSMUSG00000021359.15	Tfap2a	564.275	-1.54455	0.318579	-4.84824	1.25e-06	6.63e-05	19.7618	15.8045	7.23131	4.02259
ENSMUSG00000025348.8	Itga7	44.7506	-3.39405	0.700571	-4.84469	1.27e-06	6.73e-05	1.01466	1.58897	0.117791	0.112907
ENSMUSG00000037034.15	Pax1	410.441	-4.62218	0.954351	-4.84327	1.28e-06	6.76e-05	30.0537	9.6718	1.08292	0.400433
ENSMUSG00000037211.12	Spry1	848.519	-1.36092	0.281214	-4.83946	1.3e-06	6.85e-05	32.5581	25.5745	12.9436	7.89395
ENSMUSG00000039477.16	Tnrc18	5137.17	-0.953446	0.197013	-4.8395	1.3e-06	6.85e-05	62.1633	47.3441	29.176	22.8019
ENSMUSG00000029819.6	Npy	23.4843	-8.20484	1.69761	-4.83318	1.34e-06	7.03e-05	4.42759	6.24685	0	0
ENSMUSG00000067438.5	Hmx1	154.793	-7.14767	1.47871	-4.83371	1.34e-06	7.03e-05	15.635	10.5505	0	0.165444
ENSMUSG00000022875.17	Kng1	131.465	23.0995	4.7851	4.82737	1.38e-06	7.21e-05	0	0	15.8206	0
ENSMUSG00000041378.1	Cldn5	791.24	-1.29352	0.268235	-4.82233	1.42e-06	7.38e-05	44.4953	57.5043	22.5553	16.0922
ENSMUSG00000039395.8	Mreg	383.931	-1.65804	0.343986	-4.82006	1.44e-06	7.41e-05	16.7971	16.0823	6.32949	3.33734
ENSMUSG00000043004.13	Gng2	2110.79	-0.763689	0.158431	-4.82032	1.43e-06	7.41e-05	44.1551	45.2597	24.7585	23.7771
ENSMUSG00000053368.13	Rxfp2	94.4406	-2.07717	0.430972	-4.81972	1.44e-06	7.41e-05	4.02023	3.61422	0.783706	0.873197
ENSMUSG00000075232.4	Amd1	4520.01	0.852983	0.177144	4.81519	1.47e-06	7.56e-05	63.1683	66.1453	99.5328	115.365
ENSMUSG00000063531.7	Sema3e	191.074	2.27389	0.472353	4.81396	1.48e-06	7.58e-05	0.665075	0.769196	2.06317	4.30571
ENSMUSG00000063605.5	Ccdc102a	707.452	-1.04303	0.216815	-4.81071	1.5e-06	7.68e-05	28.7044	25.9587	13.7022	10.7342
ENSMUSG00000029570.5	Lfng	330.699	-1.34228	0.279287	-4.80609	1.54e-06	7.84e-05	12.5156	15.4194	5.37365	4.85202
ENSMUSG00000042099.15	Kank3	494.335	-1.29027	0.268505	-4.80538	1.54e-06	7.85e-05	34.0776	40.0287	16.2196	11.8353
ENSMUSG00000029816.10	Gpnmb	30.1418	-6.17478	1.28539	-4.80382	1.56e-06	7.88e-05	1.35259	0.932607	0.028467	0
ENSMUSG00000069911.10	Fam196b	99.1791	-2.14612	0.447399	-4.79687	1.61e-06	8.14e-05	2.05064	1.82749	0.494295	0.317758
ENSMUSG00000054932.6	Afp	16831.6	10.3791	2.16537	4.79324	1.64e-06	8.26e-05	1.00766	0.875643	2357.75	17.4006
ENSMUSG00000036006.19	Fam65b	191.141	-1.84738	0.385571	-4.79128	1.66e-06	8.32e-05	3.87008	6.08369	1.35775	1.21828
ENSMUSG00000027833.16	Shox2	694.299	-1.21474	0.253714	-4.78785	1.69e-06	8.44e-05	25.3897	22.4467	11.3525	7.6673
ENSMUSG00000021508.10	Cxcl14	59.1135	-2.66411	0.556825	-4.78446	1.71e-06	8.55e-05	3.86057	3.34634	0.602582	0.440952
ENSMUSG00000069372.2	Ctxn3	267.083	-2.97097	0.621012	-4.78408	1.72e-06	8.55e-05	21.339	20.1171	4.17748	0.751913
ENSMUSG00000019900.17	Rfx6	169.049	2.35938	0.493442	4.78148	1.74e-06	8.64e-05	0.660379	1.56753	4.81454	6.08096
ENSMUSG00000023025.15	Larp4	4126.67	0.895502	0.187467	4.77684	1.78e-06	8.8e-05	30.5128	26.5773	43.9838	53.3324
ENSMUSG00000038402.2	Foxf2	415.648	4.82483	1.01007	4.77671	1.78e-06	8.8e-05	0.24053	1.23985	20.342	20.0039
ENSMUSG00000029765.12	Plxna4	1103.45	-1.06871	0.223777	-4.7758	1.79e-06	8.81e-05	7.09764	8.16472	3.82682	2.90896
ENSMUSG00000042514.11	Klhl14	264.791	-2.41042	0.504761	-4.77537	1.79e-06	8.81e-05	8.99841	4.3658	1.63813	0.663862
ENSMUSG00000022619.5	Mapk8ip2	233.65	-1.49012	0.312314	-4.77124	1.83e-06	8.97e-05	6.48108	5.62002	1.75082	2.20204
ENSMUSG00000063953.2	Amd2	2408.94	0.866862	0.181971	4.76374	1.9e-06	9.28e-05	33.4114	35.1732	53.8096	61.3265
ENSMUSG00000028633.7	Ctps	5424.79	0.686027	0.144056	4.76221	1.91e-06	9.33e-05	101.379	100.221	148.035	150.466
ENSMUSG00000002930.6	Ppp1r17	106.943	-3.08223	0.647711	-4.75865	1.95e-06	9.47e-05	6.72759	7.26464	1.25523	0.287384
ENSMUSG00000034610.14	Zcchc11	5387.75	0.906359	0.190565	4.75616	1.97e-06	9.56e-05	71.565	54.521	101.747	114.572
ENSMUSG00000035969.15	Rusc2	366.528	-1.21789	0.256238	-4.75298	2e-06	9.68e-05	8.57325	7.30053	3.4646	2.80973
ENSMUSG00000032303.6	Chrna3	545.541	-1.58179	0.333266	-4.74633	2.07e-06	9.98e-05	15.4501	18.2176	6.80117	3.66005
ENSMUSG00000053137.6	Mapk11	248.954	-1.46965	0.309989	-4.74098	2.13e-06	0.000102189	11.1404	8.28664	3.55191	2.85949
ENSMUSG00000022797.15	Tfrc	5347.27	0.802671	0.169386	4.73871	2.15e-06	0.000103059	75.0399	72.2463	109.383	126.634
ENSMUSG00000087022.4	9130024F11Rik	53.9747	2.74716	0.581051	4.72792	2.27e-06	0.000108397	0.414395	0.369575	2.30187	2.42509
ENSMUSG00000030249.15	Abcc9	124.946	-2.7063	0.572726	-4.72529	2.3e-06	0.000109517	1.67359	2.06176	0.404807	0.127664
ENSMUSG00000024479.2	Mal2	889.133	1.50324	0.31818	4.72451	2.31e-06	0.000109644	8.8182	12.5395	22.0894	33.8855
ENSMUSG00000027596.10	a	22.3631	-8.11714	1.71906	-4.72186	2.34e-06	0.000110785	6.65749	3.6803	0	0
ENSMUSG00000067860.11	Zic3	31.4342	-5.15077	1.09135	-4.71965	2.36e-06	0.000111698	1.09332	0.942626	0	0.051146
ENSMUSG00000015134.14	Aldh1a3	60.3389	-3.75777	0.79678	-4.7162	2.4e-06	0.000112861	3.99469	1.12631	0.143894	0.202879
ENSMUSG00000029267.17	Mtf2	6027.53	0.916459	0.194329	4.71602	2.41e-06	0.000112861	102.23	76.1083	145.195	162.764
ENSMUSG00000074657.4	Kif5a	563.89	-1.08138	0.229305	-4.71592	2.41e-06	0.000112861	7.68499	7.94612	3.80692	3.01786
ENSMUSG00000053716.9	Dusp7	1880.41	-0.824558	0.174932	-4.7136	2.43e-06	0.000113858	51.3672	45.9408	27.6824	22.8994
ENSMUSG00000074274.7	D930028M14Rik	116.44	-2.18565	0.463806	-4.71241	2.45e-06	0.000114221	9.97893	14.3726	3.02307	1.95329
ENSMUSG00000032553.14	Srprb	1322.13	-0.893162	0.189556	-4.71187	2.45e-06	0.000114228	37.3591	36.2998	20.3435	16.2252
ENSMUSG00000056917.12	Sipa1	1453.22	-0.895802	0.190187	-4.71011	2.48e-06	0.000114915	30.8926	32.1244	17.3427	13.9388
ENSMUSG00000028978.12	Nos3	552.942	-1.03976	0.220807	-4.70894	2.49e-06	0.000115075	11.8285	12.2706	5.87865	4.95417
ENSMUSG00000056973.6	Ces1d	188.219	1.73986	0.369494	4.70877	2.49e-06	0.000115075	2.98717	3.92709	9.5947	11.8845
ENSMUSG00000032177.16	Pde4a	239.762	-1.40771	0.29929	-4.70349	2.56e-06	0.000117787	6.21531	4.82153	2.02694	1.76985
ENSMUSG00000033792.12	Atp7a	2189.89	1.19606	0.254369	4.70207	2.58e-06	0.000118299	17.597	17.6222	29.4191	44.5652
ENSMUSG00000027273.13	Snap25	81.7868	-2.54278	0.541099	-4.69929	2.61e-06	0.000119616	4.69525	5.60475	1.10547	0.535523
ENSMUSG00000059921.15	Unc5c	4986.35	0.977566	0.20805	4.6987	2.62e-06	0.000119652	27.9266	23.3968	40.1981	52.3159
ENSMUSG00000017491.8	Rarb	1997.44	1.29138	0.275154	4.69329	2.69e-06	0.000122546	19.271	29.5604	49.8357	60.8575
ENSMUSG00000012520.10	Phox2b	1203.67	-1.13236	0.241429	-4.69025	2.73e-06	0.000123643	38.9963	35.645	18.9748	12.4576
ENSMUSG00000032537.14	Ephb1	370.934	-1.15331	0.245913	-4.6899	2.73e-06	0.000123643	6.84441	7.37796	2.9725	2.92685
ENSMUSG00000055148.7	Klf2	270.537	-1.37135	0.292342	-4.6909	2.72e-06	0.000123643	13.8047	13.4021	5.59668	4.13781
ENSMUSG00000054364.4	Rhob	3130.4	-0.866084	0.184705	-4.68901	2.75e-06	0.000123866	126.297	108.503	66.7821	51.8327
ENSMUSG00000091705.8	H2-Q2	58.2298	3.26292	0.697025	4.68121	2.85e-06	0.000128348	0.688498	0.543589	7.30757	3.33422
ENSMUSG00000055782.8	Abcd2	515.164	-1.02754	0.219559	-4.68	2.87e-06	0.00012878	8.69734	7.45277	3.61403	3.65711
ENSMUSG00000004651.5	Tyr	20.7443	-8.01733	1.71404	-4.67744	2.9e-06	0.00013007	0.859027	0.759508	0	0
ENSMUSG00000000202.9	Btbd17	89.7411	-2.81078	0.601207	-4.67523	2.94e-06	0.000131148	4.66162	4.77426	0.964767	0.320623
ENSMUSG00000025991.8	Cps1	35.125	5.14502	1.10062	4.67466	2.94e-06	0.000131187	0	0.034683	0.520551	0.933576
ENSMUSG00000006457.3	Actn3	185.878	-1.53357	0.328404	-4.66976	3.02e-06	0.000134017	8.12409	6.5547	2.20327	2.45159
ENSMUSG00000006386.15	Tek	1654.14	-0.9755	0.209477	-4.65684	3.21e-06	0.000141993	29.3079	36.6726	15.3832	15.6275
ENSMUSG00000027249.15	F2	92.7863	22.2844	4.78525	4.6569	3.21e-06	0.000141993	0	0	11.1924	0
ENSMUSG00000058145.15	Adamts17	326.571	-1.23723	0.265779	-4.65511	3.24e-06	0.000142834	6.18883	7.14451	2.6637	2.56402
ENSMUSG00000025907.14	Rb1cc1	1990.76	1.18979	0.255832	4.65068	3.31e-06	0.000145579	30.8418	20.13	46.7379	59.1806
ENSMUSG00000040710.10	St8sia4	675.637	1.24262	0.267638	4.6429	3.44e-06	0.000150801	5.6353	3.71302	9.3435	10.7471
ENSMUSG00000020876.14	Snx11	381.319	-1.18306	0.25507	-4.6382	3.51e-06	0.000153884	23.3403	23.0738	10.6049	8.26056
ENSMUSG00000039934.12	Gsap	104.611	-1.8886	0.407782	-4.63139	3.63e-06	0.00015865	2.79047	2.39606	0.678244	0.609065
ENSMUSG00000058355.6	Abce1	10645.8	0.812781	0.17567	4.62675	3.71e-06	0.00016145	138.769	122.66	192.123	228.991
ENSMUSG00000074766.10	Ism1	246.169	-1.75315	0.378906	-4.62687	3.71e-06	0.00016145	10.7883	5.85596	2.10127	2.3768
ENSMUSG00000045763.7	Basp1	9557.73	-0.6695	0.144986	-4.6177	3.88e-06	0.000168241	424.101	395.302	254.385	220.098
ENSMUSG00000050965.14	Prkca	294.925	1.25579	0.27249	4.60858	4.05e-06	0.000175357	1.55001	1.76511	3.70608	3.65209
ENSMUSG00000038252.13	Ncapd2	6008.78	-0.76712	0.16659	-4.60485	4.13e-06	0.0001781	196.85	158.365	93.6877	97.7119
ENSMUSG00000087691.1	Gm15674	63.9492	2.66044	0.57787	4.60387	4.15e-06	0.000178506	0.452999	0.457121	2.20019	3.14726
ENSMUSG00000025504.12	Eps8l2	1193.45	1.10169	0.239398	4.60193	4.19e-06	0.000179745	34.8384	23.7071	53.7611	60.7223
ENSMUSG00000001552.14	Jup	1948.28	-0.83229	0.181041	-4.59724	4.28e-06	0.000183391	52.5497	55.4049	30.7361	25.2454
ENSMUSG00000041703.7	Zic5	29.004	-4.66943	1.01626	-4.59473	4.33e-06	0.00018517	1.02367	0.499139	0.033151	0.015889
ENSMUSG00000025743.14	Sdc3	3028.76	-0.86649	0.188783	-4.58987	4.44e-06	0.000189078	60.3782	45.5869	28.4431	24.8768
ENSMUSG00000024663.17	Rab3il1	840.711	-0.883342	0.19255	-4.58759	4.48e-06	0.000190293	45.0662	40.9734	20.732	22.0576
ENSMUSG00000026768.10	Itga8	705.577	0.917459	0.19999	4.58753	4.49e-06	0.000190293	7.08528	7.11178	12.4388	12.3678
ENSMUSG00000091243.1	Vgll3	61.3383	-2.47828	0.54066	-4.58381	4.57e-06	0.000193253	1.96471	2.08033	0.306505	0.364269
ENSMUSG00000011256.16	Adam19	1885.06	-0.746036	0.162779	-4.58312	4.58e-06	0.00019343	28.2789	25.1612	15.4563	13.844
ENSMUSG00000031074.14	Fgf3	98.9801	-2.32044	0.506529	-4.58106	4.63e-06	0.000193964	4.60675	4.62929	1.16155	0.546445
ENSMUSG00000038408.13	1700018A04Rik	22.6141	7.74033	1.68939	4.58174	4.61e-06	0.000193964	0	0	3.14949	2.73653
ENSMUSG00000046668.8	Cxxc5	2126.75	-0.912945	0.19928	-4.58122	4.62e-06	0.000193964	86.3904	71.6366	43.8724	33.3644
ENSMUSG00000033857.12	Engase	228.259	-1.30011	0.283904	-4.5794	4.66e-06	0.000195055	9.47969	9.01666	3.45547	3.43845
ENSMUSG00000020052.7	Ascl1	157.6	1.91023	0.41764	4.57387	4.79e-06	0.000199803	1.28267	2.08376	6.81846	5.16237
ENSMUSG00000025202.7	Scd3	46.5802	2.96552	0.648855	4.57038	4.87e-06	0.000202679	0.197082	0.194144	1.38391	1.44494
ENSMUSG00000034037.14	Fgd5	1143.42	-1.49427	0.327039	-4.56908	4.9e-06	0.000203464	25.3193	28.3238	11.8692	5.83431
ENSMUSG00000035451.6	Foxa1	1227.91	1.20004	0.262934	4.56404	5.02e-06	0.000207934	14.4902	15.5664	25.6328	37.7793
ENSMUSG00000057722.17	Lepr	300.433	1.50122	0.329032	4.56253	5.05e-06	0.000208943	2.42697	2.1148	4.74967	6.9815
ENSMUSG00000027612.7	Mmp24	56.5169	-4.48831	0.984494	-4.55901	5.14e-06	0.000211988	1.68887	2.20816	0.1596	0
ENSMUSG00000045103.17	Dmd	467.414	1.94011	0.426023	4.554	5.26e-06	0.0002166	1.91932	3.6628	7.1746	12.5601
ENSMUSG00000032013.5	Trim29	127.154	2.12885	0.467659	4.55214	5.31e-06	0.000218016	1.40319	0.791532	3.57599	5.03602
ENSMUSG00000017943.15	Gdap1l1	121.653	-1.71167	0.376296	-4.54874	5.4e-06	0.000221057	5.4091	5.32229	1.55961	1.46629
ENSMUSG00000024647.14	Cbln2	59.9845	-2.41987	0.532692	-4.54272	5.55e-06	0.000226946	2.76518	2.52261	0.451622	0.451904
ENSMUSG00000025630.8	Hprt	1513.21	0.77033	0.16967	4.54017	5.62e-06	0.000229177	55.7462	56.0202	86.3475	89.161
ENSMUSG00000068154.5	Insm1	338.478	-1.74695	0.385064	-4.53679	5.71e-06	0.000232347	12.4303	9.33134	4.03569	1.95676
ENSMUSG00000023087.15	Noct	692.206	1.11031	0.244778	4.53598	5.73e-06	0.00023271	5.16234	5.14255	12.1091	8.49013
ENSMUSG00000010505.15	Myt1	160.938	-2.07099	0.456646	-4.53521	5.75e-06	0.000233026	2.62253	4.4972	0.984261	0.602952
ENSMUSG00000098975.7	Gm27177	88.8687	-2.61108	0.576598	-4.52843	5.94e-06	0.000240084	4.97713	5.78706	1.21465	0.438551
ENSMUSG00000069045.11	Ddx3y	1036.5	1.129	0.249391	4.52702	5.98e-06	0.000241148	14.2223	11.6318	31.1091	20.903
ENSMUSG00000017493.12	Igfbp4	7005.12	-1.55314	0.343179	-4.52574	6.02e-06	0.000241518	119.499	252.253	66.9614	51.1552
ENSMUSG00000036412.5	Arsi	83.8187	-2.54838	0.56306	-4.52595	6.01e-06	0.000241518	3.98652	2.26339	0.633905	0.337868
ENSMUSG00000019909.3	Fam162b	47.6635	2.89379	0.640647	4.51698	6.27e-06	0.000251147	1.31876	1.10928	7.877	8.63647
ENSMUSG00000038733.13	Wdr26	4261.39	-0.64938	0.143844	-4.51447	6.35e-06	0.000253478	71.258	65.9417	40.1139	40.2971
ENSMUSG00000046634.12	Pkd1l1	136.233	1.85443	0.410811	4.51407	6.36e-06	0.000253478	0.386636	0.588145	1.64837	1.68036
ENSMUSG00000019814.4	Ltv1	2230.82	0.765852	0.169806	4.51015	6.48e-06	0.000257635	59.0608	61.326	90.9511	97.6069
ENSMUSG00000033419.15	Snap91	244.128	-1.3122	0.291104	-4.50766	6.55e-06	0.000260099	6.27416	6.37396	2.61235	2.09467
ENSMUSG00000020682.17	Mmp28	146.766	-1.71131	0.38014	-4.50179	6.74e-06	0.000266784	3.95059	5.21252	1.29997	1.29819
ENSMUSG00000042286.13	Stab1	1221.54	-0.788333	0.175227	-4.49892	6.83e-06	0.000269809	20.5331	18.1614	10.1951	10.3755
ENSMUSG00000021474.8	Sfxn1	3272.88	0.742362	0.165238	4.49269	7.03e-06	0.000277215	54.7734	57.3382	83.1832	89.5419
ENSMUSG00000027984.8	Hadh	5026.67	0.681394	0.151761	4.48992	7.13e-06	0.000280225	141.334	135.043	196.72	210.762
ENSMUSG00000033499.13	Larp4b	3703.58	0.655012	0.146001	4.48634	7.25e-06	0.000284342	38.1387	36.8086	56.9321	51.7726
ENSMUSG00000022211.8	Lrrc16b	382.096	-1.14764	0.255996	-4.48302	7.36e-06	0.000288166	8.01609	6.83101	3.44244	2.72509
ENSMUSG00000025995.16	Wdr75	3622.82	0.696654	0.155466	4.48106	7.43e-06	0.000290183	82.2652	75.0666	113.421	120.766
ENSMUSG00000038521.17	C1s1	27.8076	-5.37124	1.2007	-4.47344	7.7e-06	0.00030007	1.50373	0.888655	0	0.05119
ENSMUSG00000015484.3	Fam163a	129.06	-1.77416	0.39674	-4.47186	7.75e-06	0.000301635	3.69203	2.9558	1.04234	0.740363
ENSMUSG00000026509.15	Capn2	3060.25	-0.770739	0.172628	-4.46475	8.02e-06	0.000310381	88.2843	72.1959	46.4596	39.9643
ENSMUSG00000035305.5	Ror1	677.175	-1.05956	0.237338	-4.46434	8.03e-06	0.000310381	11.9855	8.58705	4.65141	4.37427
ENSMUSG00000039936.18	Pik3cd	284.415	-1.19638	0.267953	-4.46488	8.01e-06	0.000310381	5.9286	5.55241	2.20445	2.39425
ENSMUSG00000048281.8	Dleu7	50.3724	2.98845	0.669652	4.46269	8.09e-06	0.000312111	0.342794	0.67553	4.38163	3.63502
ENSMUSG00000028480.14	Glipr2	2248.59	-0.699836	0.156898	-4.46046	8.18e-06	0.000314692	79.1784	75.4696	43.0266	44.5204
ENSMUSG00000068220.5	Lgals1	3946.9	-0.766273	0.172196	-4.45	8.59e-06	0.000329699	413.015	388.163	200.142	232.412
ENSMUSG00000020027.18	Socs2	928.95	-1.03997	0.233877	-4.44667	8.72e-06	0.00033413	44.3759	31.4699	16.1101	17.563
ENSMUSG00000031278.12	Acsl4	1562.73	0.829786	0.186817	4.44171	8.92e-06	0.000341191	14.6624	13.2199	21.184	24.2659
ENSMUSG00000081169.1	Gm12551	20.6554	7.60963	1.71377	4.44029	8.98e-06	0.000342716	0	0	3.105	3.59877
ENSMUSG00000021381.4	Barx1	292.98	-1.44735	0.326067	-4.43879	9.05e-06	0.000344364	18.9242	20.5317	8.23165	5.14968
ENSMUSG00000028080.15	Lrba	2254.25	-0.846473	0.191146	-4.42841	9.49e-06	0.000360184	22.3019	16.9343	9.787	10.1972
ENSMUSG00000039155.15	Cdh26	31.0097	4.5847	1.03534	4.42819	9.5e-06	0.000360184	0	0.099159	1.2949	1.586
ENSMUSG00000046182.8	Gsg1l	77.7711	-2.82962	0.639506	-4.4247	9.66e-06	0.000365284	2.66329	1.83161	0.437385	0.138493
ENSMUSG00000034714.9	Ttyh2	343.81	-1.3199	0.29844	-4.42267	9.75e-06	0.000367953	11.1327	7.43702	3.66062	3.12895
ENSMUSG00000026414.13	Tnnt2	174.303	-2.1798	0.493451	-4.41747	9.99e-06	0.00037612	10.3933	20.599	2.46818	3.89584
ENSMUSG00000040037.13	Negr1	140.838	-1.58528	0.358904	-4.417	1e-05	0.000376136	2.98365	2.66285	0.95068	0.770426
ENSMUSG00000057751.14	Megf6	2016.86	-0.982835	0.222903	-4.40926	1.04e-05	0.000389019	33.5601	23.7144	14.8178	11.7682
ENSMUSG00000033955.12	Tnks1bp1	1922.5	-0.852746	0.193467	-4.4077	1.04e-05	0.000390995	43.8564	36.9879	23.1451	18.0395
ENSMUSG00000095486.1	Vmn2r22	20.0026	7.5633	1.71932	4.39901	1.09e-05	0.000406135	0	0	0.895673	0.938825
ENSMUSG00000026473.15	Glul	4175.81	0.722682	0.16433	4.39775	1.09e-05	0.000407637	79.2122	73.3771	127.751	104.262
ENSMUSG00000025370.6	Cdh9	102.46	1.99088	0.453568	4.38937	1.14e-05	0.00042278	0.672132	0.93993	2.82236	3.23828
ENSMUSG00000054072.11	Iigp1	221.102	2.41377	0.550032	4.38842	1.14e-05	0.000423739	2.00373	0.934613	4.03801	9.95208
ENSMUSG00000041353.12	Tmem29	653.883	1.2853	0.293161	4.38429	1.16e-05	0.000430959	20.6889	17.4786	53.5304	32.1918
ENSMUSG00000006651.7	Aplp1	1053.74	-0.847371	0.193422	-4.38096	1.18e-05	0.000436697	34.8798	37.9769	20.0039	17.422
ENSMUSG00000048458.8	Fam212b	150.681	-1.64045	0.374554	-4.37974	1.19e-05	0.000438232	3.45905	2.80765	1.08516	0.760034
ENSMUSG00000045333.15	Zfp423	1733.67	-0.945103	0.216063	-4.37419	1.22e-05	0.000448594	36.2166	25.9312	16.1419	13.4453
ENSMUSG00000022351.14	Sqle	3562.94	0.640178	0.146624	4.36612	1.26e-05	0.00046452	68.4162	61.7064	93.9395	92.418
ENSMUSG00000046613.18	Vwa5b2	51.2284	-2.53506	0.580773	-4.36498	1.27e-05	0.000465994	1.41093	1.61891	0.258655	0.230894
ENSMUSG00000040653.5	Ppp1r14c	117.362	-1.86223	0.426737	-4.36389	1.28e-05	0.000467357	3.87908	5.45524	1.1863	1.20619
ENSMUSG00000086141.7	9030622O22Rik	75.0874	2.53267	0.580506	4.36287	1.28e-05	0.000468586	0.880094	1.43304	4.93352	7.9332
ENSMUSG00000018750.14	Zbtb4	359.568	-1.07427	0.246548	-4.35725	1.32e-05	0.000477838	4.3072	3.75584	1.71452	1.79693
ENSMUSG00000026980.15	Ly75	784.854	1.10626	0.253842	4.35807	1.31e-05	0.000477838	5.40048	4.02432	10.7975	7.80863
ENSMUSG00000032083.8	Apoa1	1250.19	8.88598	2.03924	4.3575	1.32e-05	0.000477838	0.328905	0.32576	287.461	4.59564
ENSMUSG00000008398.14	Elk3	2418.48	-0.672049	0.154406	-4.35248	1.35e-05	0.000487347	49.0869	48.0946	29.5785	26.6324
ENSMUSG00000038526.14	Car14	1731.34	0.744029	0.171056	4.34962	1.36e-05	0.000492745	55.8604	50.3967	78.7773	84.5493
ENSMUSG00000035783.8	Acta2	4196.52	-0.720864	0.165869	-4.34597	1.39e-05	0.000499987	179.42	197.817	103.769	107.242
ENSMUSG00000029223.12	Uchl1	1898.99	-0.877296	0.202159	-4.33964	1.43e-05	0.000512674	177.054	153.762	73.8054	91.1721
ENSMUSG00000042842.10	Serpinb6b	98.1224	1.8868	0.434789	4.33958	1.43e-05	0.000512674	1.29519	1.15792	3.87537	4.45761
ENSMUSG00000038517.15	Tbkbp1	764.281	-0.897022	0.206914	-4.33524	1.46e-05	0.000521834	20.6704	19.1945	10.9226	8.80168
ENSMUSG00000018604.18	Tbx3	1415.78	-0.911407	0.210327	-4.33328	1.47e-05	0.000525459	31.2819	22.8361	14.0258	12.3326
ENSMUSG00000006403.12	Adamts4	216.572	-1.40993	0.325532	-4.33115	1.48e-05	0.000529235	5.59964	3.96461	1.73776	1.5448
ENSMUSG00000040093.15	Bmf	2241.08	-1.09697	0.253293	-4.33082	1.49e-05	0.000529235	59.2645	35.5406	19.993	20.4541
ENSMUSG00000044345.9	Marveld1	1127.24	-0.822786	0.1902	-4.32591	1.52e-05	0.000540082	30.4649	28.9096	17.0851	13.8715
ENSMUSG00000038005.14	2700029M09Rik	1941.8	0.670285	0.155346	4.31479	1.6e-05	0.000566854	99.8173	92.7131	143.292	138.507
ENSMUSG00000031453.15	Rasa3	1302.76	-0.852171	0.197556	-4.31357	1.61e-05	0.000568853	28.0968	27.2473	12.8662	15.2924
ENSMUSG00000021453.2	Gadd45g	203.646	-1.40668	0.326249	-4.31168	1.62e-05	0.000571475	21.4868	16.3398	7.25016	5.84232
ENSMUSG00000030606.8	Hapln3	155.009	1.59402	0.369687	4.3118	1.62e-05	0.000571475	1.26325	1.66558	4.314	3.9458
ENSMUSG00000025964.15	Adam23	296.272	-1.17404	0.272338	-4.31096	1.63e-05	0.000572186	10.6294	9.21432	3.77434	4.28452
ENSMUSG00000042282.4	Gucy2f	33.6868	5.05176	1.17221	4.30959	1.64e-05	0.00057462	0.042101	0	0.466369	0.479654
ENSMUSG00000025665.16	Rps6ka6	6249.42	0.988325	0.229582	4.30489	1.67e-05	0.000585798	78.2364	57.2686	105.72	139.81
ENSMUSG00000020806.15	Rhbdf2	271.845	-1.35134	0.314126	-4.30192	1.69e-05	0.000592547	9.68278	8.34769	2.74762	3.74233
ENSMUSG00000042258.13	Isl1	3207.68	0.860753	0.200287	4.2976	1.73e-05	0.000601834	68.2917	57.2832	93.0839	115.716
ENSMUSG00000061887.14	Ssbp3	7042.42	-0.987267	0.229725	-4.29761	1.73e-05	0.000601834	267.217	203.712	130.922	87.8323
ENSMUSG00000087497.7	2810001G20Rik	393.474	1.06051	0.24737	4.28715	1.81e-05	0.000629604	17.8639	18.5452	33.3786	36.5856
ENSMUSG00000027950.7	Chrnb2	203.094	-1.50672	0.351625	-4.28502	1.83e-05	0.000633524	3.53444	3.54815	1.41602	0.895837
ENSMUSG00000055407.13	Map6	286.011	-1.88626	0.44021	-4.2849	1.83e-05	0.000633524	5.47896	9.10484	2.47926	1.21735
ENSMUSG00000020312.11	Shc2	1309.15	-0.77174	0.180362	-4.27884	1.88e-05	0.000647245	34.8168	29.612	18.4588	16.2178
ENSMUSG00000021374.9	Nup153	6252.39	0.70516	0.16477	4.27968	1.87e-05	0.000647245	58.2241	60.3325	84.0307	93.8292
ENSMUSG00000050271.12	D8Ertd82e	1088.7	-0.77949	0.182159	-4.27917	1.88e-05	0.000647245	19.7101	17.6053	10.7065	9.30019
ENSMUSG00000070407.5	Hs3st3b1	904.44	0.792915	0.185492	4.27465	1.91e-05	0.000658251	9.29114	8.12651	14.0719	13.6158
ENSMUSG00000053024.14	Cntn2	284.595	-1.46483	0.342764	-4.27358	1.92e-05	0.000660146	6.37208	9.37564	2.43367	2.8773
ENSMUSG00000079015.2	Serpina1c	50.5436	3.64855	0.854313	4.27074	1.95e-05	0.000667328	0.291438	0.420057	6.3326	1.92655
ENSMUSG00000056870.9	Gulp1	1344.34	0.983283	0.230415	4.26745	1.98e-05	0.000675934	21.0789	17.8296	30.3086	40.048
ENSMUSG00000027931.12	Npr1	790.538	-0.875775	0.205361	-4.26456	2e-05	0.000683436	20.8524	21.9977	11.7216	9.82421
ENSMUSG00000069601.13	Ank3	2140.22	-0.718921	0.168862	-4.25744	2.07e-05	0.000704194	42.8571	39.3817	25.1033	20.9396
ENSMUSG00000037994.14	Slc9b2	73.2461	-2.29537	0.539376	-4.25561	2.08e-05	0.000708636	2.16684	3.58846	0.511593	0.580747
ENSMUSG00000042489.15	Clspn	2499.03	0.66981	0.157551	4.25139	2.12e-05	0.000720746	28.7861	29.2118	44.8595	40.2342
ENSMUSG00000048904.4	Neurog1	55.7872	-2.92297	0.687683	-4.25047	2.13e-05	0.000722341	3.32982	4.31238	0.69348	0.239836
ENSMUSG00000061086.12	Myl4	156.212	-2.12305	0.499586	-4.24962	2.14e-05	0.000723711	11.1184	24.701	3.75658	3.91425
ENSMUSG00000097072.7	Foxl2os	75.3988	-2.83883	0.668171	-4.24866	2.15e-05	0.000725442	4.13021	3.38317	0.76331	0.204758
ENSMUSG00000022096.14	Hr	33.8564	-3.12839	0.736562	-4.24729	2.16e-05	0.000728502	0.690231	0.704644	0.076098	0.071591
ENSMUSG00000034586.14	Hid1	330.286	-1.05071	0.247419	-4.24666	2.17e-05	0.000729161	13.3326	12.718	5.83798	5.74242
ENSMUSG00000033788.15	Dysf	866.754	-1.0364	0.244137	-4.24514	2.18e-05	0.000732741	13.1912	10.7088	6.31645	4.40826
ENSMUSG00000048489.12	8430408G22Rik	364.397	1.02579	0.241756	4.24311	2.2e-05	0.000738021	11.6079	11.6009	22.5106	21.0291
ENSMUSG00000043391.9	2510009E07Rik	576.865	-0.993529	0.23423	-4.24168	2.22e-05	0.000741337	9.21837	9.9074	4.98487	3.90076
ENSMUSG00000102976.5	Zc3h11a	1754.3	1.08951	0.256935	4.24042	2.23e-05	0.000744106	51.0768	44.837	116.763	71.3229
ENSMUSG00000027894.14	Slc6a17	361.412	-1.27769	0.301751	-4.23426	2.29e-05	0.000763353	5.94237	6.53533	2.88655	1.88952
ENSMUSG00000096722.1	Hmgb1-ps9	236.378	1.3249	0.313011	4.23277	2.31e-05	0.000767012	15.7231	11.4578	29.4629	32.1515
ENSMUSG00000054074.9	Skida1	284.894	-1.94171	0.458944	-4.23081	2.33e-05	0.000772266	34.334	14.4006	6.57126	4.88461
ENSMUSG00000001248.14	Gramd1a	2449.01	-0.759483	0.179587	-4.22905	2.35e-05	0.000776894	89.131	77.1024	50.0979	40.267
ENSMUSG00000015094.16	Npdc1	369.328	-1.0292	0.243631	-4.22444	2.4e-05	0.000791501	28.4078	28.0503	12.2669	13.1508
ENSMUSG00000032291.8	Crabp1	5306.12	-0.924404	0.218906	-4.22283	2.41e-05	0.0007957	522.138	592.291	321.582	222.138
ENSMUSG00000026343.6	Gpr39	29.8721	4.60666	1.09107	4.22216	2.42e-05	0.000796584	0	0.095993	1.62086	0.9468
ENSMUSG00000027525.17	Phactr3	376.42	-2.11222	0.500606	-4.21932	2.45e-05	0.000805191	15.2142	14.8381	5.03978	1.45699
ENSMUSG00000052727.5	Map1b	4599.27	-0.652417	0.15474	-4.21621	2.48e-05	0.000814865	29.9733	31.0916	17.5059	18.2697
ENSMUSG00000031969.15	Acad8	1197.76	-0.800383	0.189966	-4.21329	2.52e-05	0.00082396	58.2934	46.5783	27.8252	27.2914
ENSMUSG00000041453.12	Rpl21	5697.47	1.01911	0.242091	4.2096	2.56e-05	0.000835982	213.172	279.328	546.526	379.658
ENSMUSG00000028631.7	Kcnq4	60.1739	-2.25637	0.536248	-4.2077	2.58e-05	0.000841491	1.56509	1.69624	0.295716	0.334304
ENSMUSG00000031451.5	Gas6	180.399	-1.45519	0.345953	-4.20633	2.6e-05	0.000845057	7.71112	5.51342	2.12039	2.28042
ENSMUSG00000023411.11	Nfatc4	3551.17	-0.76269	0.181509	-4.20194	2.65e-05	0.000860043	89.8951	70.7554	47.1724	39.8067
ENSMUSG00000031928.14	Mre11a	2534.76	0.862933	0.205421	4.2008	2.66e-05	0.000862827	45.6587	44.819	88.7571	63.3254
ENSMUSG00000028834.13	Trim63	33.4448	-3.61291	0.86055	-4.19837	2.69e-05	0.000869174	2.74082	1.71474	0.248027	0.078727
ENSMUSG00000038418.7	Egr1	117.14	-1.75458	0.417926	-4.19831	2.69e-05	0.000869174	2.81033	2.38581	0.854938	0.56229
ENSMUSG00000066232.3	Ipo7	7707.08	0.810376	0.193248	4.19344	2.75e-05	0.00088644	124.545	107.306	165.071	207.428
ENSMUSG00000055639.16	Dach1	2069.17	-0.678877	0.162108	-4.18782	2.82e-05	0.00090705	33.5178	31.0921	19.8986	17.2642
ENSMUSG00000049537.10	Tecrl	308.903	1.61804	0.386475	4.18666	2.83e-05	0.000910046	2.91181	5.26751	10.3434	13.1886
ENSMUSG00000020679.11	Hnf1b	79.425	2.93099	0.70022	4.18582	2.84e-05	0.000911766	0.165247	0.780976	3.50272	3.66307
ENSMUSG00000004110.14	Cacna1e	43.7967	-2.94682	0.704238	-4.1844	2.86e-05	0.000915817	0.409543	0.262801	0.028244	0.050761
ENSMUSG00000058297.16	Spock2	836.136	-0.799539	0.191236	-4.18091	2.9e-05	0.00092832	13.8734	13.3383	6.97279	7.39731
ENSMUSG00000036202.15	Rif1	5125.77	1.03278	0.247238	4.17727	2.95e-05	0.000940679	62.8952	42.6004	84.3854	112.545
ENSMUSG00000106795.1	Gm43050	42.6538	3.90214	0.934178	4.17709	2.95e-05	0.000940679	0	1.09882	9.11986	9.54801
ENSMUSG00000015944.9	Gatsl2	1133.16	-0.945681	0.226457	-4.17599	2.97e-05	0.000943511	15.1015	11.7309	7.31276	5.48556
ENSMUSG00000020108.3	Ddit4	1504.84	-0.985707	0.236091	-4.17511	2.98e-05	0.000945504	64.1213	88.0334	37.4566	33.7674
ENSMUSG00000062961.6	Ccdc177	72.1165	-2.05835	0.493383	-4.17191	3.02e-05	0.000957162	1.51486	1.15212	0.288514	0.295457
ENSMUSG00000019929.15	Dcn	2674.39	1.21779	0.292056	4.16969	3.05e-05	0.000964797	43.589	65.5769	96.4967	137.905
ENSMUSG00000071658.4	Gng3	256.493	-1.23164	0.295653	-4.16584	3.1e-05	0.000979486	12.8459	14.4083	4.98254	5.69321
ENSMUSG00000028525.16	Pde4b	418.401	1.24451	0.299286	4.15826	3.21e-05	0.00101077	5.33363	6.1607	10.5539	14.56
ENSMUSG00000022367.7	Has2	1877.82	1.18926	0.286316	4.15366	3.27e-05	0.00102951	14.5223	20.0826	29.491	43.3166
ENSMUSG00000038065.13	Mturn	640.393	-0.862203	0.207741	-4.15038	3.32e-05	0.0010425	10.464	10.3235	5.05549	5.46603
ENSMUSG00000031673.5	Cdh11	12331.9	0.836106	0.201472	4.14997	3.33e-05	0.00104252	122.592	147.262	202.176	241.655
ENSMUSG00000023007.15	Prpf40b	1055.32	-0.837401	0.201825	-4.14914	3.34e-05	0.00104449	41.6969	35.6813	22.1416	17.7075
ENSMUSG00000030226.12	Lmo3	105.739	-1.6486	0.397403	-4.14844	3.35e-05	0.00104585	3.94292	3.47273	1.10742	1.08024
ENSMUSG00000093954.8	Gm16867	80.2611	-2.58132	0.622322	-4.14788	3.36e-05	0.00104655	4.68505	3.80697	1.00049	0.313315
ENSMUSG00000034168.6	Irf2bpl	1078.29	-1.00189	0.241611	-4.14672	3.37e-05	0.00105006	22.9951	22.0815	12.5105	8.29155
ENSMUSG00000091625.8	Lsm5	655.432	-0.956372	0.230691	-4.14568	3.39e-05	0.00105296	97.2779	117.995	52.7117	49.9739
ENSMUSG00000056174.8	Col8a2	597.677	-1.44876	0.349517	-4.14504	3.4e-05	0.00105406	9.10905	16.8889	4.25492	4.603
ENSMUSG00000030683.11	Sez6l2	107.161	-2.78604	0.672491	-4.14286	3.43e-05	0.0010623	5.20019	2.69651	0.830167	0.215035
ENSMUSG00000024304.14	Cdh2	4938.58	-0.613349	0.148106	-4.14128	3.45e-05	0.00106777	85.9177	74.1245	48.9033	47.1994
ENSMUSG00000030123.15	Plxnd1	5326.2	-0.790855	0.191445	-4.13097	3.61e-05	0.00111488	64.9998	68.1933	40.8545	30.3031
ENSMUSG00000079560.13	Hoxa3	1152.08	-0.918752	0.222507	-4.12909	3.64e-05	0.0011221	43.8854	33.4656	21.1346	16.4247
ENSMUSG00000022822.15	Abcc5	2475.62	-0.716609	0.17362	-4.12746	3.67e-05	0.00112786	65.0594	61.5254	39.329	31.6659
ENSMUSG00000032269.7	Htr3a	65.4804	-3.59987	0.872249	-4.12711	3.67e-05	0.00112786	3.17131	4.29129	0.530658	0.048182
ENSMUSG00000022025.13	Lect1	20.7125	-4.53695	1.09999	-4.12455	3.71e-05	0.00113851	1.99789	1.73779	0.077354	0.070473
ENSMUSG00000023886.9	Smoc2	812.951	0.897185	0.217696	4.12128	3.77e-05	0.00115085	12.8285	12.9712	25.0888	19.3425
ENSMUSG00000032531.15	Amotl2	3034.95	-0.637878	0.154773	-4.12136	3.77e-05	0.00115085	61.8177	54.7105	36.3996	32.4683
ENSMUSG00000025647.16	Shisa5	851.617	-0.842193	0.204489	-4.11852	3.81e-05	0.00116074	52.1111	50.2198	29.2987	23.37
ENSMUSG00000052516.17	Robo2	1782.99	1.17709	0.285785	4.11879	3.81e-05	0.00116074	11.8708	17.8142	26.5134	35.4934
ENSMUSG00000045932.12	Ifit2	652.847	1.11176	0.270192	4.11469	3.88e-05	0.00117813	6.68689	7.22228	11.5553	16.0801
ENSMUSG00000038528.14	BC021785	20.7371	7.61826	1.85293	4.11146	3.93e-05	0.00119271	0	0	2.23572	0.471797
ENSMUSG00000026994.9	Galnt3	839.606	-1.63528	0.397901	-4.10977	3.96e-05	0.00119942	28.706	22.6722	11.0422	4.26383
ENSMUSG00000054618.8	Gm9951	16.7394	7.30637	1.7783	4.10863	3.98e-05	0.00120331	0	0	1.33022	0.909186
ENSMUSG00000022658.10	Tagln3	720.005	-0.94887	0.231115	-4.10561	4.03e-05	0.00121707	44.1809	53.9787	25.116	22.0369
ENSMUSG00000031073.5	Fgf15	95.1743	-1.74081	0.424802	-4.09793	4.17e-05	0.00125605	5.02541	5.37697	1.54106	1.33793
ENSMUSG00000055053.17	Nfic	706.399	-0.83389	0.203541	-4.09691	4.19e-05	0.00125942	15.8074	13.1587	7.71239	7.21054
ENSMUSG00000001630.13	Stk38l	700.9	1.02827	0.251028	4.09622	4.2e-05	0.00126105	7.69461	5.60557	11.2578	13.437
ENSMUSG00000022621.16	Rabl2	578.679	-0.860355	0.210111	-4.09475	4.23e-05	0.00126693	33.6625	34.8728	18.2055	16.6507
ENSMUSG00000026797.15	Stxbp1	1012.87	-0.881297	0.215646	-4.08679	4.37e-05	0.00130901	24.203	20.9518	12.9003	9.66337
ENSMUSG00000025427.14	Rnf165	819.602	-0.773775	0.189437	-4.08461	4.42e-05	0.0013191	15.8144	14.1179	8.43098	7.65731
ENSMUSG00000036611.5	Eepd1	230.062	-1.18977	0.291393	-4.08306	4.44e-05	0.00132352	8.24209	6.93344	3.23644	2.88336
ENSMUSG00000039116.4	Adgrg6	328.272	-1.13476	0.277911	-4.08317	4.44e-05	0.00132352	4.79503	4.15423	1.6648	2.06244
ENSMUSG00000029919.5	Hpgds	116.39	1.80752	0.443093	4.07932	4.52e-05	0.0013427	1.25631	1.84737	4.44298	5.48807
ENSMUSG00000022957.19	Itsn1	3532.17	-0.626525	0.153691	-4.07653	4.57e-05	0.00135663	70.4718	60.2055	39.5951	38.1523
ENSMUSG00000034687.8	Fras1	4138.57	0.582228	0.142958	4.07273	4.65e-05	0.00137666	14.4601	13.8216	19.5314	19.4229
ENSMUSG00000041119.11	Pde9a	646.552	1.054	0.258927	4.07066	4.69e-05	0.00138667	16.2268	18.3782	28.7747	37.41
ENSMUSG00000063884.6	Ptcd3	4153.57	0.639237	0.157113	4.06864	4.73e-05	0.0013964	99.8101	97.3284	135.331	147.011
ENSMUSG00000041789.7	2700046A07Rik	48.729	2.9788	0.732436	4.06698	4.76e-05	0.00140407	0.213847	0.687753	3.25155	3.58805
ENSMUSG00000031543.18	Ank1	576.4	0.857626	0.21104	4.0638	4.83e-05	0.00141862	5.48675	5.62461	9.22815	9.3448
ENSMUSG00000079277.9	Hoxd3	749.392	-0.787841	0.19386	-4.06396	4.82e-05	0.00141862	24.3828	22.8325	12.3265	12.8029
ENSMUSG00000027546.15	Atp9a	962.825	-0.846197	0.208402	-4.06041	4.9e-05	0.00143463	26.2496	19.9458	11.9603	11.5626
ENSMUSG00000030849.17	Fgfr2	2468.5	0.770652	0.189788	4.0606	4.89e-05	0.00143463	42.1088	33.195	55.6578	61.9507
ENSMUSG00000034295.9	Fhod3	327.552	-1.1147	0.27477	-4.05683	4.97e-05	0.00145441	6.03323	4.69279	2.4962	2.04305
ENSMUSG00000027257.13	Pacsin3	543.502	-1.16727	0.287853	-4.0551	5.01e-05	0.0014628	49.4292	33.8335	14.7482	19.0511
ENSMUSG00000028780.13	Sema3c	3864.42	0.936082	0.231033	4.05173	5.08e-05	0.00148162	33.99	31.3549	47.0418	67.4628
ENSMUSG00000025089.15	Gfra1	1569.73	-0.784404	0.193643	-4.05077	5.1e-05	0.00148526	34.482	37.8268	21.4081	17.4037
ENSMUSG00000026185.8	Igfbp5	46713.7	-0.837437	0.206905	-4.04744	5.18e-05	0.00149677	778.36	518.939	336.637	328.182
ENSMUSG00000041773.7	Enc1	1807.7	-0.741237	0.183136	-4.04748	5.18e-05	0.00149677	34.3546	27.3281	17.8918	15.9596
ENSMUSG00000062991.6	Nrg1	95.0803	-1.70101	0.420242	-4.0477	5.17e-05	0.00149677	4.39604	4.50098	1.30244	1.22853
ENSMUSG00000106736.1	Gm42573	370.852	1.02228	0.252528	4.0482	5.16e-05	0.00149677	36.8643	29.4432	61.4076	61.7065
ENSMUSG00000082127.2	Gm13577	221.302	1.38084	0.341364	4.04507	5.23e-05	0.00150953	47.5184	30.922	86.548	97.5328
ENSMUSG00000027009.18	Itga4	1972.1	1.07555	0.266018	4.04314	5.27e-05	0.00151952	9.39706	8.43449	13.3762	21.0073
ENSMUSG00000042498.16	D330045A20Rik	204.731	1.42017	0.351589	4.03929	5.36e-05	0.00154219	2.38226	1.52499	4.49539	4.92427
ENSMUSG00000058254.12	Tspan7	1321.85	-0.735034	0.182131	-4.03574	5.44e-05	0.00156318	62.4402	55.2031	35.367	29.6719
ENSMUSG00000079654.3	Prrt4	84.8099	-1.81974	0.450974	-4.03512	5.46e-05	0.0015648	2.68263	2.33162	0.728439	0.574953
ENSMUSG00000030207.15	Fam234b	712.65	-0.93818	0.232606	-4.03335	5.5e-05	0.00157411	16.9321	12.254	7.0014	6.92719
ENSMUSG00000042029.6	Ncapg2	2758.17	0.923992	0.229343	4.02886	5.6e-05	0.00160188	21.0986	16.2081	27.8075	36.841
ENSMUSG00000037010.7	Apln	176.415	-1.38783	0.344653	-4.02675	5.66e-05	0.00161369	5.73092	4.76387	2.12919	1.5543
ENSMUSG00000055322.14	Tns1	1707.13	-0.945277	0.234874	-4.02461	5.71e-05	0.00162585	24.2634	16.4844	10.7958	8.59705
ENSMUSG00000030500.5	Slc17a6	49.2677	-2.83358	0.70454	-4.02189	5.77e-05	0.00164211	1.07812	1.48737	0.241496	0.093528
ENSMUSG00000004098.7	Col5a3	76.924	-2.07816	0.51715	-4.01849	5.86e-05	0.00165803	1.30022	1.32261	0.373848	0.205638
ENSMUSG00000022836.10	Mylk	676.661	0.914301	0.227506	4.0188	5.85e-05	0.00165803	4.0999	3.74529	6.15281	7.40288
ENSMUSG00000029093.14	Sorcs2	896.29	0.780755	0.194289	4.01852	5.86e-05	0.00165803	7.49156	8.02523	12.1614	12.4552
ENSMUSG00000036446.4	Lum	543.18	1.21253	0.3019	4.01633	5.91e-05	0.0016706	9.20181	10.9925	17.5427	25.7073
ENSMUSG00000018411.17	Mapt	75.5677	-2.26218	0.563301	-4.01593	5.92e-05	0.0016708	3.80383	2.83822	0.871899	0.408255
ENSMUSG00000020469.8	Myl7	209.626	-2.1605	0.538126	-4.01485	5.95e-05	0.0016758	18.7298	55.0629	7.99513	7.4619
ENSMUSG00000035640.18	Cbarp	550.821	-0.886262	0.22079	-4.01406	5.97e-05	0.00167881	22.1591	24.5487	11.9784	11.381
ENSMUSG00000045827.10	Serpinb9	222.555	1.69682	0.422879	4.01253	6.01e-05	0.00168703	1.37703	2.44167	4.79785	6.81371
ENSMUSG00000031939.15	Taf1d	1761.68	0.772859	0.192659	4.01153	6.03e-05	0.0016915	69.7652	57.5852	92.931	106.212
ENSMUSG00000024451.8	Arap3	1208.16	-0.770547	0.192228	-4.00851	6.11e-05	0.0017106	18.1983	19.3268	11.1114	9.20816
ENSMUSG00000032411.15	Tfdp2	693.175	0.891997	0.222587	4.00741	6.14e-05	0.00171586	18.1382	15.17	26.2699	30.1653
ENSMUSG00000030521.11	Mphosph10	2234.5	0.766184	0.191558	3.99975	6.34e-05	0.00176961	52.4381	46.2619	69.9507	83.8978
ENSMUSG00000038375.15	Trp53inp2	1611.8	-0.693673	0.173466	-3.9989	6.36e-05	0.00177319	36.3225	32.3356	21.0841	17.9684
ENSMUSG00000032549.7	Rab6b	187.854	-1.72138	0.430665	-3.99704	6.41e-05	0.0017844	3.88787	4.35417	1.58481	0.756577
ENSMUSG00000018547.8	Pip4k2b	2550.33	-0.723011	0.180923	-3.99624	6.44e-05	0.0017848	42.4664	39.6863	25.7795	20.0991
ENSMUSG00000024256.6	Adcyap1	37.0365	-3.09409	0.774207	-3.99646	6.43e-05	0.0017848	1.47241	2.579	0.277517	0.169279
ENSMUSG00000031709.15	Tbc1d9	372.954	-1.08808	0.272366	-3.9949	6.47e-05	0.00178775	8.72093	6.2564	3.28941	3.14306
ENSMUSG00000035401.9	2210018M11Rik	3484.26	0.661637	0.165627	3.99474	6.48e-05	0.00178775	56.3523	46.3558	73.3003	75.5924
ENSMUSG00000036699.12	Zcchc12	209.549	-1.30019	0.325471	-3.99478	6.48e-05	0.00178775	8.02746	9.38785	2.98564	3.54887
ENSMUSG00000022261.5	Sdc2	1832.75	0.884456	0.221433	3.99424	6.49e-05	0.00178838	23.449	26.3948	37.2154	47.4727
ENSMUSG00000041075.8	Fzd7	3028.46	-0.744856	0.186497	-3.99393	6.5e-05	0.00178838	59.7901	48.3779	32.9231	26.4277
ENSMUSG00000019874.11	Fabp7	176.592	-1.30354	0.326535	-3.99202	6.55e-05	0.0018	22.3964	17.9756	7.70253	7.21122
ENSMUSG00000034908.15	Sidt2	1737.69	-0.653868	0.163825	-3.99125	6.57e-05	0.0018031	48.8086	45.0107	26.8669	27.9173
ENSMUSG00000004356.7	Utp20	3774.16	0.634404	0.159201	3.98491	6.75e-05	0.00184905	21.9562	21.2032	29.4285	32.1635
ENSMUSG00000071553.10	Cpa2	451.961	1.50943	0.378896	3.98376	6.78e-05	0.00185522	17.9162	9.03241	28.373	40.7039
ENSMUSG00000048015.3	Neurod4	397.635	-3.87132	0.97224	-3.98186	6.84e-05	0.00186723	16.2834	12.4841	1.50676	0.315483
ENSMUSG00000021775.10	Nr1d2	557.29	0.861883	0.216488	3.9812	6.86e-05	0.00186955	5.78895	5.77472	9.36051	10.0032
ENSMUSG00000025352.6	Gdf11	1569.18	-0.768956	0.193204	-3.98002	6.89e-05	0.00187309	35.3864	27.5841	18.1358	15.7765
ENSMUSG00000078495.10	Gm13157	957.75	0.909733	0.228596	3.97966	6.9e-05	0.00187309	19.3137	14.1171	27.0194	30.3148
ENSMUSG00000094439.1	Gm21969	20.0329	-5.49748	1.38139	-3.97968	6.9e-05	0.00187309	0.551193	0.603254	0.022706	0
ENSMUSG00000090231.10	Cfb	195.277	2.31149	0.581464	3.97529	7.03e-05	0.00190487	2.13693	1.63679	13.5723	3.74243
ENSMUSG00000055531.12	Cpsf6	8980.57	0.868532	0.218568	3.97373	7.08e-05	0.00191448	87.4726	108.956	147.032	183.531
ENSMUSG00000053747.9	Sox14	23.6517	-5.72306	1.44305	-3.96594	7.31e-05	0.00197511	2.26081	0.674245	0	0.048904
ENSMUSG00000026821.15	Ralgds	1211.86	-0.692677	0.174731	-3.96426	7.36e-05	0.00198308	34.5993	34.0599	20.7767	18.3811
ENSMUSG00000046782.14	4921506M07Rik	157.195	1.91396	0.482781	3.96445	7.36e-05	0.00198308	0.613176	1.27755	2.84022	3.82516
ENSMUSG00000026955.13	Sapcd2	610.678	-1.03637	0.261705	-3.96006	7.49e-05	0.00201505	29.8086	38.9929	17.26	13.9397
ENSMUSG00000035189.16	Ano4	357.846	1.95406	0.493485	3.95972	7.5e-05	0.00201505	1.26565	3.91723	8.93401	9.96498
ENSMUSG00000024172.10	St6gal2	695.945	0.884759	0.223723	3.95471	7.66e-05	0.00205458	6.41792	5.03074	9.2204	10.0466
ENSMUSG00000025738.7	Fbxl16	261.234	-1.26393	0.31963	-3.95435	7.67e-05	0.0020546	7.30608	6.38538	3.17053	2.09213
ENSMUSG00000044548.11	Dact1	3253.99	-0.644376	0.162972	-3.95392	7.69e-05	0.00205525	78.8849	67.3213	46.0724	39.9375
ENSMUSG00000026880.11	Stom	765.593	-0.761462	0.192751	-3.9505	7.8e-05	0.0020817	24.2313	21.9496	12.3636	12.6648
ENSMUSG00000084129.1	Hmgb1-ps1	791.713	0.818544	0.207222	3.95009	7.81e-05	0.00208215	59.3047	57.1113	88.3594	100.443
ENSMUSG00000071178.11	Serpina1b	82.1745	2.98868	0.75688	3.94868	7.86e-05	0.0020913	0.798672	0.653401	8.59027	1.97485
ENSMUSG00000020393.16	Kremen1	1030.13	-0.859627	0.217917	-3.94474	7.99e-05	0.00212275	20.7594	15.0404	9.21995	8.83982
ENSMUSG00000002885.14	Adgre5	512.012	-1.08634	0.275515	-3.94293	8.05e-05	0.00213252	27.3591	17.7515	9.80967	9.51626
ENSMUSG00000016984.7	Etaa1	2290.03	0.76	0.192739	3.94316	8.04e-05	0.00213252	27.6442	24.7938	36.8115	44.6032
ENSMUSG00000048450.10	Msx1	923.612	-3.03218	0.769649	-3.93969	8.16e-05	0.00215828	74.6382	36.3077	9.01856	3.46725
ENSMUSG00000041609.16	Ccdc64	175.985	-1.24779	0.317144	-3.93446	8.34e-05	0.00220251	8.85873	8.15202	3.44016	3.12941
ENSMUSG00000021149.7	Gtpbp4	5968.95	0.648947	0.165037	3.93214	8.42e-05	0.00222064	100.638	100.493	135.854	154.117
ENSMUSG00000032841.15	Prr5l	512.509	-0.874372	0.222425	-3.93108	8.46e-05	0.00222538	12.5088	12.0601	6.73147	5.62466
ENSMUSG00000038736.9	Nudcd1	1888.99	0.824522	0.209753	3.93091	8.46e-05	0.00222538	26.5501	24.4622	36.3224	46.516
ENSMUSG00000024427.6	Spry4	273.463	-1.59594	0.406151	-3.92943	8.51e-05	0.00222927	5.45104	6.07574	2.42607	1.11973
ENSMUSG00000024598.8	Fbn2	10730.6	0.544552	0.138591	3.92919	8.52e-05	0.00222927	53.263	54.0106	73.2528	70.8744
ENSMUSG00000029730.16	Mcm7	11509.4	0.568836	0.144775	3.9291	8.53e-05	0.00222927	214.209	225.349	309.706	291.373
ENSMUSG00000090602.2	Gm5611	1331.05	0.749149	0.190668	3.92907	8.53e-05	0.00222927	85.7822	71.053	131.556	110.428
ENSMUSG00000048349.9	Pou4f1	51.6075	-2.35303	0.599152	-3.92726	8.59e-05	0.00224288	1.12278	1.37003	0.271626	0.186179
ENSMUSG00000000902.13	Smarcb1	3417.63	-0.626641	0.159777	-3.92197	8.78e-05	0.00228264	151.796	139.524	82.9248	90.3713
ENSMUSG00000032181.6	Scg3	170.624	-1.58056	0.402964	-3.92234	8.77e-05	0.00228264	6.82808	7.76808	2.90719	1.64932
ENSMUSG00000083899.2	Gm12346	9905.39	0.668367	0.170412	3.92206	8.78e-05	0.00228264	223.228	214.138	292.822	345.462
ENSMUSG00000036990.13	Otud4	5015.94	0.585799	0.149425	3.92037	8.84e-05	0.0022945	41.204	37.7989	53.0632	55.8759
ENSMUSG00000045287.6	Rtn4rl1	98.2839	-1.64099	0.418805	-3.91826	8.92e-05	0.00231072	2.5846	2.84559	0.789644	0.821862
ENSMUSG00000047842.6	Diras2	69.5517	-2.38504	0.608745	-3.91797	8.93e-05	0.00231072	2.43424	1.0611	0.308781	0.304029
ENSMUSG00000012422.14	Tmem167	5974.76	0.70176	0.179393	3.91185	9.16e-05	0.00236661	34.4711	36.8753	49.2544	57.52
ENSMUSG00000025777.8	Gdap1	63.068	-2.12349	0.543014	-3.91056	9.21e-05	0.00237586	1.6324	1.81327	0.444881	0.288327
ENSMUSG00000038119.14	Cdon	1450.67	-0.988397	0.253121	-3.90484	9.43e-05	0.00242922	22.0887	15.5246	10.2679	7.16838
ENSMUSG00000020886.16	Dlg4	1002.74	-1.23608	0.316949	-3.89992	9.62e-05	0.0024755	67.8056	35.4314	22.454	17.4306
ENSMUSG00000042367.12	Gjb3	109.334	-1.69897	0.435875	-3.89784	9.71e-05	0.00249326	6.70455	4.7978	1.89902	1.33897
ENSMUSG00000031731.16	Ap1g1	5417.36	0.566944	0.145566	3.89476	9.83e-05	0.00252156	53.2914	46.734	68.4541	67.6662
ENSMUSG00000096942.1	Rps19-ps6	2814.47	0.688235	0.176825	3.89219	9.93e-05	0.00254474	296.233	336.271	498.914	443.185
ENSMUSG00000027217.13	Tspan18	1028.18	-0.973766	0.250314	-3.89017	0.000100174	0.00255494	25.3855	26.6313	14.8375	9.68489
ENSMUSG00000029754.13	Dlx6	168.153	-2.17986	0.560279	-3.89067	0.0001	0.00255494	16.257	10.7716	4.23017	1.29645
ENSMUSG00000035299.16	Mid1	1353.9	0.868438	0.223228	3.89037	0.000100092	0.00255494	17.0147	20.1652	35.7633	27.2149
ENSMUSG00000028439.14	Fam219a	252.331	-1.31367	0.337969	-3.88695	0.000101511	0.00258408	7.54896	7.79231	3.52655	2.17299
ENSMUSG00000040699.13	Limd2	4288.71	-0.562486	0.14472	-3.88672	0.000101607	0.00258408	130.63	117.527	80.2612	74.2775
ENSMUSG00000020695.14	Mrc2	2933.99	-0.668711	0.17211	-3.88537	0.000102173	0.00259475	47.3453	42.7125	28.8889	23.3035
ENSMUSG00000067786.16	Nnat	7580.84	-0.821954	0.211628	-3.88396	0.000102769	0.00260616	702.843	948.701	445.448	418.964
ENSMUSG00000096210.1	H1f0	9467.67	-0.556156	0.143234	-3.88285	0.000103241	0.00261441	340.158	295.949	206.877	190.841
ENSMUSG00000047446.18	Arl4a	897.41	1.15827	0.298558	3.87954	0.000104654	0.00264643	10.5384	16.591	32.0018	24.3126
ENSMUSG00000024593.15	Megf10	554.7	-0.867997	0.223777	-3.87885	0.000104953	0.00265021	6.37363	6.40605	3.56896	2.89393
ENSMUSG00000032423.12	Syncrip	11811.4	1.01087	0.260942	3.87393	0.000107092	0.0027004	78.5963	66.9162	102.364	165.608
ENSMUSG00000038267.14	Slc22a23	660.002	-0.845335	0.218482	-3.86913	0.000109226	0.00275029	10.6561	10.031	5.94553	4.66463
ENSMUSG00000032744.4	Heyl	831.591	-0.765913	0.19801	-3.86805	0.000109707	0.0027585	14.6667	15.2941	8.75353	7.52041
ENSMUSG00000044562.10	Rasip1	735.61	-0.908268	0.234843	-3.86755	0.000109934	0.00276031	17.3163	21.1771	10.3356	8.66883
ENSMUSG00000039037.5	St6galnac5	150.69	-1.41383	0.365597	-3.86718	0.000110102	0.00276062	2.90567	2.56092	1.10737	0.78614
ENSMUSG00000021701.7	Plk2	3680.84	-0.69529	0.179885	-3.86519	0.000111001	0.00277926	118.065	91.9413	57.7606	61.072
ENSMUSG00000034993.7	Vat1	1384.92	-0.706803	0.182919	-3.86402	0.000111534	0.0027874	39.6957	40.2859	24.7254	20.5037
ENSMUSG00000045005.9	Fzd5	296.405	1.04549	0.270587	3.86379	0.00011164	0.0027874	1.75246	1.92893	3.4696	3.56455
ENSMUSG00000027796.2	Smad9	508.007	0.969998	0.251312	3.85973	0.000113511	0.00283014	4.60468	3.67992	8.40168	6.47689
ENSMUSG00000037315.14	Jade3	1464.9	0.711927	0.184517	3.85834	0.000114162	0.00284238	15.2581	15.282	21.6621	24.3296
ENSMUSG00000033953.10	Ppp3r1	3405.71	0.58714	0.152248	3.85646	0.000115042	0.00286029	61.3698	63.7465	89.1034	84.2272
ENSMUSG00000030393.8	Zik1	2992.14	0.78661	0.204175	3.85262	0.00011686	0.00290143	33.9208	33.4462	46.6424	60.0583
ENSMUSG00000021824.12	Ap3m1	4075.19	0.74503	0.193439	3.8515	0.000117398	0.00291071	38.9227	31.7087	61.7757	47.1196
ENSMUSG00000032068.14	Plet1	246.212	-1.9125	0.496659	-3.85072	0.000117771	0.00291589	15.6181	14.3758	5.56956	1.8308
ENSMUSG00000020863.15	Luc7l3	9851.39	0.668713	0.173675	3.85038	0.000117936	0.00291592	182.252	150.119	226.602	257.619
ENSMUSG00000009378.3	Slc16a12	260.958	1.86725	0.485595	3.84528	0.000120417	0.002969	1.03615	2.4488	4.61994	7.35884
ENSMUSG00000028248.15	Pnisr	6930.96	0.795041	0.206741	3.84559	0.000120263	0.002969	121.466	92.7536	152.014	187.995
ENSMUSG00000057541.14	Pus7	1339.08	0.856266	0.222705	3.84484	0.000120629	0.00297012	22.605	24.2374	34.2514	43.8246
ENSMUSG00000031838.7	Ifi30	573.907	1.12489	0.292665	3.84362	0.000121235	0.0029809	24.344	23.0241	59.5	36.1298
ENSMUSG00000091183.5	Gm5141	307.323	0.97349	0.253472	3.84062	0.000122726	0.00301341	5.59362	5.22911	9.94968	9.58813
ENSMUSG00000059022.14	Kcp	887.119	-1.26404	0.329336	-3.83815	0.000123962	0.00303956	47.3566	32.4395	19.9573	10.6717
ENSMUSG00000018593.12	Sparc	11422	-0.51008	0.132944	-3.8368	0.00012465	0.00305221	411.886	390.634	265.554	253.042
ENSMUSG00000043168.12	4930426D05Rik	118.904	-3.01508	0.785953	-3.8362	0.000124951	0.00305271	17.3825	3.24997	1.67933	0.665312
ENSMUSG00000049928.15	Glp2r	27.6825	3.75431	0.978683	3.83608	0.000125014	0.00305271	0.069545	0.039537	0.429321	0.849616
ENSMUSG00000004655.5	Aqp1	169.324	-1.39466	0.363726	-3.83436	0.00012589	0.00306989	5.62475	6.36394	1.80285	2.40057
ENSMUSG00000028517.8	Ppap2b	2382.65	-0.605838	0.158017	-3.83401	0.000126071	0.00307009	59.7908	57.5416	37.9181	33.1156
ENSMUSG00000039081.9	Zfp503	3752.13	-0.830084	0.21653	-3.83357	0.000126297	0.00307139	85.1045	62.3851	43.5592	32.6884
ENSMUSG00000027460.7	Angpt4	56.589	2.18256	0.569535	3.83218	0.000127014	0.00308039	0.482926	0.615259	2.58081	2.17313
ENSMUSG00000093930.1	Hmgcs1	12323.7	0.766108	0.199897	3.83251	0.000126845	0.00308039	160.796	201.681	268.742	299.941
ENSMUSG00000019055.15	Plod1	1510.51	-0.696537	0.181814	-3.83105	0.000127597	0.00309031	36.4428	37.9416	23.0767	19.3113
ENSMUSG00000024299.16	Adamts10	1943.78	-0.701285	0.183197	-3.82803	0.000129171	0.00312419	52.0393	41.052	27.7265	24.7855
ENSMUSG00000001493.9	Meox1	911.645	-0.733983	0.19176	-3.82762	0.000129389	0.00312521	35.9746	30.069	18.9391	17.4896
ENSMUSG00000039485.7	Tspyl4	1764.19	-0.609789	0.159381	-3.82599	0.000130249	0.00314171	35.629	35.1525	21.4791	21.2254
ENSMUSG00000046844.6	Vat1l	455.441	-0.94967	0.248484	-3.82185	0.000132452	0.00319052	11.2887	12.6061	6.35878	5.10619
ENSMUSG00000010529.5	Gm266	671.053	-0.843737	0.220989	-3.81801	0.000134532	0.00323624	42.7025	48.6276	25.25	21.8686
ENSMUSG00000037362.8	Nov	116.358	-1.59041	0.416687	-3.8168	0.000135193	0.00324773	3.32283	4.4581	1.1707	1.22963
ENSMUSG00000056220.14	Pla2g4a	645.362	1.02824	0.269437	3.81624	0.000135502	0.00325077	11.2181	8.08094	15.7194	20.0961
ENSMUSG00000041762.16	Gpr155	122.575	1.88238	0.493435	3.81485	0.000136263	0.00326462	0.7174	0.891052	1.94966	3.58743
ENSMUSG00000031103.12	Elf4	443.654	-0.87153	0.228494	-3.81423	0.000136607	0.00326845	5.90389	6.2295	3.12118	2.99039
ENSMUSG00000043673.10	Kcns3	160.118	1.56084	0.409422	3.8123	0.000137678	0.00328965	1.43267	2.0648	5.78097	3.95673
ENSMUSG00000032564.15	Cpne4	83.8351	-2.40125	0.630052	-3.8112	0.000138295	0.00329744	3.2901	1.36286	0.528713	0.265455
ENSMUSG00000046230.9	Vps13a	1084.06	1.14306	0.299959	3.81072	0.000138561	0.00329744	5.36233	3.71531	7.14576	11.0799
ENSMUSG00000059013.12	Sh2d3c	1035	-0.81387	0.213556	-3.81104	0.000138384	0.00329744	35.6193	27.6179	18.1369	14.8795
ENSMUSG00000100826.6	Snhg14	1105.38	1.33628	0.350885	3.8083	0.000139923	0.00332543	0.2673	0.19762	0.301178	0.175181
ENSMUSG00000062960.10	Kdr	3295.03	-0.721548	0.189566	-3.80632	0.000141052	0.00334776	40.6343	49.4621	25.4675	25.0197
ENSMUSG00000025020.11	Slit1	164.472	-1.74194	0.458405	-3.8	0.000144696	0.00342969	2.79253	4.57164	1.30239	0.75083
ENSMUSG00000030074.9	Gxylt2	293.335	-1.09942	0.289437	-3.79848	0.000145585	0.00344617	4.64203	3.82369	1.62739	1.99172
ENSMUSG00000027804.13	Ppid	6597.55	0.844316	0.222336	3.79748	0.000146177	0.00345557	127.613	143.293	189.608	257.533
ENSMUSG00000037236.14	Matr3	16063.9	0.983954	0.259237	3.79559	0.000147296	0.00347739	185.09	120.176	230.267	320.22
ENSMUSG00000027495.4	Fam210b	1204.07	0.651953	0.171876	3.79315	0.000148747	0.00350235	17.2295	16.1551	24.0078	24.2337
ENSMUSG00000066894.14	Vsig10	332.285	-1.38605	0.36538	-3.79345	0.000148571	0.00350235	11.7597	6.26713	3.55971	2.71287
ENSMUSG00000004113.18	Cacna1b	155.186	-1.52456	0.40217	-3.79083	0.000150143	0.00353054	1.82673	1.24439	0.588255	0.388624
ENSMUSG00000016087.13	Fli1	2290.46	-0.642051	0.169427	-3.78954	0.000150926	0.00354426	59.6565	55.4682	32.1084	35.6503
ENSMUSG00000047146.15	Tet1	1527.7	0.670466	0.177014	3.78765	0.000152078	0.00356661	8.08949	8.85864	12.6689	12.235
ENSMUSG00000078502.10	Gm13212	675.392	0.870265	0.230011	3.78358	0.000154591	0.00362078	9.47999	8.13515	13.3999	16.0697
ENSMUSG00000020609.14	Apob	5714.39	8.19947	2.16778	3.78243	0.000155307	0.00363275	0.203843	0.161913	100.398	0.710885
ENSMUSG00000026676.7	Ccdc3	85.0964	-1.72643	0.456541	-3.78153	0.000155864	0.003641	3.02009	3.25893	0.786287	0.968818
ENSMUSG00000027200.17	Sema6d	693.786	-0.83521	0.221094	-3.77762	0.000158331	0.00369378	10.8248	12.1191	5.6325	6.22948
ENSMUSG00000020388.12	Pdlim4	544.329	0.798289	0.211358	3.77696	0.000158756	0.00369884	21.6851	21.655	34.8419	34.5599
ENSMUSG00000028478.18	Clta	4086.79	-0.596775	0.158034	-3.77625	0.00015921	0.00370455	292.326	282.283	166.819	182.495
ENSMUSG00000078794.4	Dact3	2519.2	-0.645397	0.17108	-3.77249	0.000161628	0.0037559	70.3453	62.3511	42.8012	35.2874
ENSMUSG00000021087.17	Rtn1	395.993	-1.76964	0.469379	-3.77017	0.000163139	0.00378113	25.9201	13.0667	7.49027	3.08659
ENSMUSG00000038916.6	Soga3	270.261	-1.14461	0.303585	-3.7703	0.000163049	0.00378113	6.37373	5.78857	2.99324	2.0795
ENSMUSG00000001288.14	Rarg	1505.31	-0.667647	0.177124	-3.76937	0.00016366	0.00378826	51.1341	42.2634	27.026	26.9045
ENSMUSG00000000359.3	Rem1	138.7	1.86088	0.493941	3.7674	0.000164955	0.00380243	1.40862	3.25474	7.71027	8.53089
ENSMUSG00000021536.7	Adcy2	68.075	-2.06721	0.548732	-3.76724	0.000165063	0.00380243	2.07215	1.29952	0.432665	0.298173
ENSMUSG00000028977.16	Casz1	132.755	-1.39818	0.371151	-3.76714	0.000165128	0.00380243	1.83256	1.71648	0.565473	0.673944
ENSMUSG00000031111.16	Igsf1	56.5932	-2.37003	0.629101	-3.76734	0.000164998	0.00380243	1.75662	1.93742	0.223229	0.456477
ENSMUSG00000026692.12	Fmo4	20.4389	7.59408	2.01625	3.76643	0.000165599	0.00380835	0	0	1.73617	0.131488
ENSMUSG00000033900.13	Map9	771.354	0.903518	0.239945	3.76551	0.000166206	0.00381738	5.6855	5.68438	8.51079	11.0295
ENSMUSG00000006678.6	Pola1	3703.75	0.768668	0.204203	3.76423	0.000167064	0.00383213	35.0007	31.3006	45.081	58.4023
ENSMUSG00000052698.14	Tln2	2769.92	-0.569458	0.151352	-3.76248	0.000168238	0.00385408	18.5747	16.6295	11.3188	10.4936
ENSMUSG00000059475.13	Zfp426	1197.71	0.936234	0.249065	3.75899	0.000170602	0.00390321	17.4527	23.4059	33.1563	39.1459
ENSMUSG00000096225.7	Lhx8	190.801	-1.70811	0.454613	-3.75729	0.000171764	0.00392473	12.5517	10.7139	4.62227	1.95709
ENSMUSG00000024087.3	Cyp1b1	845.195	-0.858629	0.228686	-3.75462	0.000173606	0.00395159	13.0646	14.2583	7.99467	5.95392
ENSMUSG00000024777.9	Ppp2r5b	667.654	-0.770169	0.205101	-3.75508	0.00017329	0.00395159	23.5607	20.9836	12.9318	11.1024
ENSMUSG00000025213.11	Kazald1	81.958	-3.38206	0.900728	-3.7548	0.000173477	0.00395159	6.23038	5.63493	1.00234	0.05966
ENSMUSG00000033737.14	Fndc3c1	7994.77	0.94827	0.252614	3.75384	0.000174147	0.00395883	98.9206	64.4997	123.178	164.338
ENSMUSG00000024054.13	Smchd1	5583.39	0.605274	0.161295	3.75259	0.000175017	0.00397353	47.4596	41.524	59.1347	65.074
ENSMUSG00000025026.14	Add3	3666.36	0.684662	0.182671	3.74807	0.000178204	0.00404072	39.8503	40.5532	54.2618	64.5503
ENSMUSG00000021680.7	Crhbp	24.67	3.53483	0.943333	3.74717	0.00017884	0.00404999	0.20281	0.114273	1.67844	1.50742
ENSMUSG00000022240.9	Ctnnd2	725.382	-1.04501	0.278935	-3.74642	0.000179378	0.004057	13.3226	8.12538	4.59558	4.875
ENSMUSG00000032348.5	Gsta4	2901.25	0.708026	0.189043	3.74531	0.000180171	0.00406976	151.493	145.249	200.565	244.458
ENSMUSG00000030930.13	Chst15	524.041	-0.879754	0.235375	-3.73767	0.000185731	0.00419003	8.96498	8.64141	4.99004	3.84176
ENSMUSG00000041187.16	Prkd2	580.736	-0.801097	0.21439	-3.73664	0.000186498	0.004202	18.163	16.8977	10.0882	8.45383
ENSMUSG00000022033.9	Pbk	2025.5	0.763873	0.204448	3.73627	0.000186772	0.00420285	54.2076	58.0696	78.6666	96.7513
ENSMUSG00000026479.13	Lamc2	829.538	-1.24826	0.334281	-3.73416	0.000188345	0.00423288	23.9368	11.6703	6.59539	7.01317
ENSMUSG00000038077.7	Kcna6	316.807	-0.996825	0.267364	-3.72834	0.000192748	0.00432637	6.26971	7.17701	3.2489	2.98953
ENSMUSG00000033257.14	Ttll4	3507.99	0.620566	0.166475	3.72768	0.000193253	0.00433224	28.7422	24.6054	36.0341	39.1734
ENSMUSG00000033597.8	Caskin1	135.212	-1.40644	0.377511	-3.72557	0.000194875	0.00435759	2.27691	1.84124	0.811277	0.613773
ENSMUSG00000069227.4	Gprin1	280.061	-0.983686	0.264026	-3.72571	0.000194763	0.00435759	5.82243	5.51297	2.79255	2.48677
ENSMUSG00000046417.14	Lrrc75a	638.014	-0.798275	0.214324	-3.72461	0.000195614	0.00436862	29.0815	23.7305	13.7288	14.0829
ENSMUSG00000024601.8	Isoc1	3952.22	0.618204	0.166022	3.72362	0.000196385	0.00438035	78.5297	78.1799	104.224	116.97
ENSMUSG00000031734.12	Irx3	748.026	-0.730436	0.196273	-3.72153	0.000198022	0.00441133	22.7969	23.4697	13.4988	12.2188
ENSMUSG00000046351.10	Zfp322a	2286.62	1.06108	0.285152	3.72109	0.000198364	0.00441341	24.9015	40.2612	56.9911	69.2481
ENSMUSG00000059857.15	Ntng1	258.196	1.01587	0.273088	3.71993	0.000199277	0.00442819	2.17163	2.03265	3.93227	3.87976
ENSMUSG00000040860.16	Crocc	1206.7	-0.92571	0.248889	-3.71937	0.000199724	0.00443188	27.7598	18.2169	12.2357	9.9111
ENSMUSG00000041057.9	Wdr43	5581.92	0.597134	0.160559	3.71909	0.000199942	0.00443188	79.0016	86.6453	114.506	116.516
ENSMUSG00000033904.15	Ccp110	3068.47	0.630696	0.169814	3.71404	0.000203978	0.00451571	26.8817	25.1253	34.6637	39.2806
ENSMUSG00000026872.16	Zeb2	2400.21	0.600282	0.161642	3.71365	0.000204288	0.00451696	27.2717	23.7094	34.9184	36.0242
ENSMUSG00000024112.16	Cacna1h	798.796	-1.17871	0.317484	-3.71267	0.000205087	0.00452899	19.5028	10.1069	5.95359	5.93677
ENSMUSG00000025212.16	Sfxn3	445.692	-0.94423	0.254663	-3.70776	0.000209097	0.0046061	14.2718	11.3236	6.82065	5.37394
ENSMUSG00000057465.4	Saa2	51.0473	3.54403	0.955779	3.708	0.000208903	0.0046061	0	1.4992	8.1148	10.2252
ENSMUSG00000096740.7	Lbhd1	772.735	-1.55127	0.419249	-3.70013	0.000215493	0.00474111	56.351	81.7933	12.7268	30.0485
ENSMUSG00000033006.9	Sox10	997.878	-0.952713	0.257559	-3.69901	0.000216444	0.00475616	33.9934	28.6493	18.1949	11.6579
ENSMUSG00000024076.9	Vit	93.689	1.6222	0.438747	3.69735	0.000217864	0.00477878	0.993328	1.15349	2.96271	3.20315
ENSMUSG00000073010.9	Gm5127	323.697	4.10322	1.10983	3.69718	0.000218012	0.00477878	0.378039	2.1569	17.0191	24.2963
ENSMUSG00000020627.9	Klhl29	519.673	-0.833153	0.225451	-3.6955	0.000219456	0.00480452	6.76659	5.45769	3.21042	3.0788
ENSMUSG00000044220.13	Nkx2-3	125.597	-1.63402	0.442209	-3.69514	0.000219768	0.00480542	7.49858	4.19719	1.76624	1.66144
ENSMUSG00000006567.11	Atp7b	391.676	1.1132	0.30129	3.6948	0.000220059	0.00480589	2.54399	2.36606	5.98716	3.82772
ENSMUSG00000010021.13	Kif19a	57.674	-2.05079	0.555163	-3.69403	0.000220724	0.00481449	3.81424	3.26491	0.849514	0.691923
ENSMUSG00000027985.14	Lef1	777.276	-0.874845	0.236917	-3.69262	0.000221957	0.00483546	23.6777	16.7978	10.7876	9.425
ENSMUSG00000043496.7	Tril	2168.53	-0.687262	0.186142	-3.69214	0.000222374	0.00483861	36.0404	28.4547	19.8377	16.9336
ENSMUSG00000080776.1	Gm12174	3496.88	0.66797	0.181007	3.6903	0.000223986	0.00486772	202.692	224.562	294.925	330.563
ENSMUSG00000058975.6	Kcnc1	43.1565	-2.67358	0.724627	-3.6896	0.000224607	0.00487527	0.754445	0.544268	0.135604	0.051975
ENSMUSG00000043929.16	Klhl15	444.944	0.866848	0.235029	3.68827	0.000225788	0.00489491	5.19926	4.38352	7.751	8.26091
ENSMUSG00000014725.14	Adam28	30.6998	3.70587	1.0051	3.68708	0.000226841	0.00490244	0.109947	0.081736	0.547695	1.65001
ENSMUSG00000025949.15	Pikfyve	1603.94	0.704342	0.19101	3.68746	0.000226503	0.00490244	10.8825	8.81322	13.9686	15.3902
ENSMUSG00000039137.18	Whrn	672.492	0.796535	0.216042	3.68694	0.000226962	0.00490244	11.2685	12.8878	19.5692	19.2583
ENSMUSG00000018865.8	Sult4a1	119.217	-1.39657	0.378887	-3.68598	0.000227826	0.00491513	4.75048	4.61794	1.55877	1.69258
ENSMUSG00000027962.14	Vcam1	2424.85	-0.842639	0.228717	-3.6842	0.000229422	0.00493949	62.9237	56.1915	25.3779	35.4209
ENSMUSG00000031827.12	Cotl1	3186.31	-0.697671	0.189373	-3.6841	0.000229511	0.00493949	161.489	164.065	105.754	79.6533
ENSMUSG00000006800.13	Sulf2	8026.13	-0.662097	0.179929	-3.67977	0.000233448	0.00501431	186.726	151.755	109.656	87.1287
ENSMUSG00000097545.7	Mir124a-1hg	70.7517	-1.98104	0.538376	-3.67965	0.000233552	0.00501431	1.57841	1.94779	0.52344	0.308154
ENSMUSG00000029755.10	Dlx5	224.02	-2.06915	0.562461	-3.67874	0.000234391	0.00502626	19.9525	13.0372	5.70645	1.56258
ENSMUSG00000038034.15	Igsf8	653.608	-0.860812	0.23402	-3.67838	0.000234723	0.00502731	29.6017	24.0841	15.3332	11.8301
ENSMUSG00000017057.9	Il13ra1	660.276	1.07978	0.29358	3.67797	0.000235093	0.00502918	6.41434	8.21078	11.8496	16.7172
ENSMUSG00000029304.14	Spp1	130.557	-1.61662	0.439696	-3.67667	0.000236296	0.00504884	9.30956	7.86824	3.3442	1.82167
ENSMUSG00000066477.13	Gm16551	39.7765	-3.09712	0.842467	-3.67625	0.000236687	0.00505112	1.07419	3.15911	0.315766	0.158001
ENSMUSG00000019979.12	Apaf1	1760.34	-0.7252	0.197285	-3.6759	0.000237016	0.00505208	27.7197	22.8839	15.7864	12.3602
ENSMUSG00000091400.1	Gm6356	146.676	1.40634	0.382999	3.67192	0.000240737	0.00512524	2.67101	3.16909	6.42288	7.97259
ENSMUSG00000034457.10	Eda2r	147.683	1.61199	0.439277	3.66965	0.000242881	0.00516472	0.923118	1.20963	2.32714	3.68043
ENSMUSG00000026657.16	Frmd4a	2306.21	-0.636679	0.173534	-3.6689	0.000243598	0.00517376	50.6387	44.8529	31.0562	25.4944
ENSMUSG00000049511.5	Htr1b	62.2715	-2.18258	0.595088	-3.66766	0.000244785	0.00519277	1.54705	1.96829	0.249625	0.455823
ENSMUSG00000018474.17	Chd3	6533.94	0.623817	0.170123	3.66686	0.00024555	0.0052028	94.1836	93.1534	149.018	117.387
ENSMUSG00000097346.1	Gm26619	5119.2	0.821876	0.224169	3.66633	0.00024606	0.00520739	183.91	257.984	366.876	356.289
ENSMUSG00000038390.11	Gpr162	380.448	-0.993562	0.271049	-3.66561	0.000246746	0.00521569	10.6162	8.4653	4.99927	3.78591
ENSMUSG00000040276.14	Pacsin1	96.8575	-1.75965	0.480325	-3.66345	0.000248842	0.00525376	4.34299	4.17534	1.51671	0.802913
ENSMUSG00000023473.11	Celsr3	234.34	-1.7293	0.472125	-3.66281	0.000249465	0.00526066	2.04279	4.74657	1.039	0.870758
ENSMUSG00000018362.14	Kpna2	9062.5	0.592373	0.161808	3.66095	0.00025128	0.00529267	223.288	246.232	318.866	333.537
ENSMUSG00000024500.18	Ppp2r2b	431.138	-0.847386	0.231508	-3.66028	0.000251941	0.00530029	15.9887	16.1236	7.98713	8.4472
ENSMUSG00000045930.2	Clec14a	602.601	-0.807987	0.220927	-3.65725	0.000254937	0.00535698	11.5534	10.261	5.33378	6.08725
ENSMUSG00000022269.13	2020-03-11	35.4925	-2.56802	0.702259	-3.6568	0.00025538	0.00535998	2.68693	2.86509	0.53756	0.324012
ENSMUSG00000022103.9	Gfra2	210.584	-1.32754	0.363376	-3.65334	0.000258849	0.00542637	5.77766	5.45918	2.60174	1.53493
ENSMUSG00000042581.14	Thsd7b	419.224	-3.41158	0.933916	-3.65299	0.000259204	0.00542741	7.4729	9.87933	1.24001	0.285699
ENSMUSG00000082896.1	Gm5844	5847.26	0.66385	0.18196	3.64832	0.000263956	0.00552041	135.352	130.826	174.61	212.594
ENSMUSG00000002308.15	Cd320	1271.96	-0.610444	0.167356	-3.64758	0.000264726	0.00553	62.7661	58.4097	37.2318	35.7278
ENSMUSG00000004952.13	Rasa4	94.8537	-1.7742	0.486471	-3.64708	0.000265242	0.00553428	3.50842	5.50275	1.11665	1.32373
ENSMUSG00000047879.16	Usp14	4973.21	0.548197	0.150415	3.64457	0.000267837	0.00558187	143.315	126.407	177.892	184.23
ENSMUSG00000024542.8	Cep192	3803.98	0.802398	0.220243	3.64324	0.000269232	0.00560438	25.2324	19.1042	30.9815	39.6704
ENSMUSG00000027598.16	Itch	3743.52	0.70969	0.194843	3.64237	0.000270144	0.00561679	38.5537	42.315	55.1146	66.5949
ENSMUSG00000034329.16	Brip1	725.076	0.766185	0.210539	3.63916	0.00027353	0.00567887	5.61629	5.07173	7.83604	8.84864
ENSMUSG00000037071.2	Scd1	1320.32	0.673364	0.185044	3.63893	0.000273769	0.00567887	12.9981	14.0604	19.4199	20.3796
ENSMUSG00000045114.10	Prrt2	16.8947	-6.31797	1.73649	-3.63836	0.000274378	0.00568488	0.626861	1.0056	0.00157	0.015827
ENSMUSG00000033411.16	Ctdspl2	3702.15	0.682724	0.187812	3.63515	0.00027782	0.00574949	43.2711	36.8759	53.6017	64.2793
ENSMUSG00000031285.14	Dcx	896.498	-1.02561	0.282223	-3.63403	0.000279033	0.00576117	10.9879	15.8625	7.04982	5.22463
ENSMUSG00000095440.1	Fignl2	2211.63	-0.673178	0.185236	-3.63416	0.000278885	0.00576117	44.2055	39.2059	27.0577	21.132
ENSMUSG00000027715.9	Ccna2	8838.9	0.550281	0.151451	3.63339	0.000279721	0.00576868	157.731	163.209	210.511	222.138
ENSMUSG00000021139.17	Gm20498	239.84	1.93458	0.532733	3.63143	0.000281857	0.00580599	7.19922	5.31209	10.9661	31.9339
ENSMUSG00000032334.9	Loxl1	495.837	-0.790948	0.217892	-3.62999	0.000283431	0.00583166	11.9948	12.2494	6.70325	6.21129
ENSMUSG00000035085.5	1700020L24Rik	31.9659	-2.75145	0.758407	-3.62794	0.000285693	0.00586462	6.62369	6.02298	1.09527	0.666476
ENSMUSG00000040329.14	Il7	45.8122	-2.18295	0.601663	-3.62819	0.000285412	0.00586462	1.09584	0.895876	0.20516	0.194989
ENSMUSG00000002718.14	Cse1l	13025.4	0.768142	0.211857	3.62576	0.000288118	0.00589398	258.758	289.565	369.991	488.432
ENSMUSG00000008136.14	Fhl2	420.096	0.894931	0.246792	3.62625	0.000287566	0.00589398	11.5715	12.5402	19.6866	21.7769
ENSMUSG00000014767.16	Tbp	1832.52	1.10463	0.304646	3.62594	0.000287913	0.00589398	14.4502	24.2381	45.0145	32.42
ENSMUSG00000040680.8	Kremen2	18.4605	-6.37667	1.75941	-3.62432	0.00028972	0.00591995	1.55317	0.68796	0	0.028635
ENSMUSG00000021367.7	Edn1	860.846	-0.864111	0.238486	-3.62332	0.000290841	0.00592921	29.2987	31.6635	18.1616	12.8664
ENSMUSG00000038349.10	Plcl1	248.832	1.31139	0.361924	3.62338	0.000290777	0.00592921	1.36518	1.58611	2.69399	4.08609
ENSMUSG00000027797.15	Dclk1	888.499	-0.704867	0.194579	-3.62253	0.000291735	0.00594063	15.2604	14.7769	8.05496	8.87767
ENSMUSG00000030077.11	Chl1	210.341	1.20638	0.333252	3.62002	0.000294581	0.00599172	1.0396	1.30014	2.33273	2.6725
ENSMUSG00000040479.11	Dgkz	2862.41	-0.651532	0.180008	-3.61945	0.000295225	0.00599796	78.2838	83.5924	52.6858	42.5138
ENSMUSG00000013611.14	Snx31	19.9678	-4.4605	1.23492	-3.61198	0.000303872	0.00615963	1.43039	1.02603	0.097696	0
ENSMUSG00000024030.6	Abcg1	301.911	-1.06295	0.294299	-3.61181	0.000304066	0.00615963	8.7146	6.08018	3.22624	3.24021
ENSMUSG00000026202.13	Tuba4a	403.356	-1.01686	0.281548	-3.61168	0.000304222	0.00615963	12.9696	16.8466	6.47553	7.13562
ENSMUSG00000005846.11	Rsl1d1	8765.86	0.566597	0.156929	3.61054	0.000305564	0.00617977	238.014	242.971	312.687	342.682
ENSMUSG00000025532.13	Crcp	624.484	0.740251	0.205106	3.60911	0.000307253	0.00620686	29.0953	27.6352	43.1085	44.0126
ENSMUSG00000037005.16	Xpnpep2	111.891	-1.92675	0.534063	-3.60772	0.000308898	0.006233	3.51726	3.06275	1.16591	0.443827
ENSMUSG00000042529.14	Kcnj12	54.1772	-2.22588	0.617246	-3.60615	0.000310775	0.00626377	2.16944	2.48157	0.616583	0.305052
ENSMUSG00000037386.15	Rims2	104.374	-1.51016	0.418877	-3.60526	0.000311846	0.00627824	1.97336	2.17159	0.599469	0.732999
ENSMUSG00000040721.9	Zfhx2	992.027	-0.656202	0.182104	-3.60345	0.000314026	0.00631498	8.45666	7.85299	5.07377	4.45798
ENSMUSG00000052921.13	Arhgef15	521.676	-0.886101	0.245981	-3.60232	0.000315392	0.00633528	11.0617	10.5627	6.23341	4.56957
ENSMUSG00000023192.12	Grm2	18.483	-4.90997	1.36319	-3.60183	0.00031599	0.00634012	0.360977	0.731999	0.033546	0
ENSMUSG00000004040.16	Stat3	743.355	-1.19816	0.332725	-3.60104	0.000316945	0.00634497	31.9963	15.8843	10.1086	8.85041
ENSMUSG00000052387.15	Trpm3	89.0144	-1.67439	0.464963	-3.60112	0.000316844	0.00634497	2.05597	1.66683	0.447311	0.620453
ENSMUSG00000022864.13	D16Ertd472e	388.106	1.00211	0.278314	3.60065	0.00031742	0.00634732	7.01747	6.79684	11.0218	14.3902
ENSMUSG00000024797.12	Vps51	1123.07	-0.703207	0.19536	-3.59955	0.000318769	0.00636714	67.3913	57.8293	38.9376	31.7657
ENSMUSG00000041431.16	Ccnb1	6836.77	0.503427	0.139909	3.59825	0.000320366	0.00639185	169.783	169.54	229.187	214.017
ENSMUSG00000011254.16	Thg1l	1125.81	0.653069	0.181518	3.59782	0.000320897	0.00639527	29.3311	28.0488	44.7258	38.4133
ENSMUSG00000016349.10	Eef1a2	16.6827	-5.2314	1.45484	-3.59585	0.00032333	0.00643336	0.817469	1.18889	0	0.048135
ENSMUSG00000022636.13	Alcam	1417.42	-0.91748	0.255161	-3.59569	0.000323532	0.00643336	44.7876	42.8667	17.1361	25.381
ENSMUSG00000040624.17	Plekhg1	889.781	-0.833586	0.231863	-3.59516	0.000324187	0.00643918	14.5308	11.6468	6.00662	7.43756
ENSMUSG00000041881.12	Ndufa7	1736.8	0.675396	0.187882	3.59479	0.000324648	0.00644115	136.469	158.729	219.045	217.083
ENSMUSG00000010122.14	Slc47a1	23.8561	5.596	1.5572	3.59363	0.000326099	0.00646272	0	0.032035	1.59803	0.286924
ENSMUSG00000015961.8	Adss	6028.42	0.572217	0.159306	3.59194	0.00032823	0.00649772	114.818	114.516	148.784	164.795
ENSMUSG00000028158.14	Mttp	662.706	1.3086	0.364366	3.59143	0.000328867	0.00650308	7.6558	6.51419	22.2752	10.2156
ENSMUSG00000053046.14	Brsk2	98.3884	-1.52187	0.424063	-3.58878	0.000332235	0.00655509	2.88847	3.07195	1.09047	0.847029
ENSMUSG00000059412.6	Fxyd2	47.7754	4.40607	1.22772	3.58884	0.000332155	0.00655509	0	0.75399	15.5388	1.99204
ENSMUSG00000029802.13	Abcg2	2978.38	1.11118	0.309726	3.58762	0.000333714	0.00657698	28.7759	29.8731	40.3015	75.7189
ENSMUSG00000001794.12	Capns1	3302.76	-0.892763	0.248933	-3.58636	0.000335325	0.0066014	240.351	143.143	97.532	91.2777
ENSMUSG00000049929.7	Lpar4	1988.96	0.912059	0.254359	3.58571	0.000336161	0.00661054	24.4962	17.6807	30.3451	42.0485
ENSMUSG00000004044.9	Ptrf	1262.02	-0.718205	0.200473	-3.58255	0.000340256	0.00668368	26.631	31.5704	16.8939	15.8193
ENSMUSG00000027253.15	Lrp4	1599.96	-0.746784	0.208544	-3.58094	0.000342356	0.00671751	20.9439	15.7616	11.042	9.02444
ENSMUSG00000027660.16	Skil	4586.69	0.718056	0.200667	3.57835	0.000345772	0.00677002	36.9617	34.1917	46.7763	60.5405
ENSMUSG00000075592.9	Nynrin	6904.77	-0.585712	0.163683	-3.57833	0.000345794	0.00677002	78.1847	66.1961	48.2223	40.2787
ENSMUSG00000000308.14	Ckmt1	108.109	-1.47434	0.412127	-3.57739	0.000347037	0.00678219	9.16291	7.60984	3.13683	2.39998
ENSMUSG00000061535.11	C1qtnf7	44.5947	-2.69736	0.754067	-3.57709	0.000347446	0.00678219	2.32145	0.893919	0.175819	0.258954
ENSMUSG00000097375.2	6720427I07Rik	417.57	1.15402	0.322624	3.577	0.00034756	0.00678219	7.42674	7.0807	11.4492	18.1109
ENSMUSG00000020799.16	Tekt1	173.893	1.26269	0.353054	3.57648	0.000348246	0.00678813	4.99691	4.40165	9.07425	11.5777
ENSMUSG00000001786.14	Fbxo7	608.104	-0.90719	0.253801	-3.57442	0.000351008	0.00683206	17.4206	17.064	10.0579	6.9603
ENSMUSG00000020649.11	Rrm2	8246.45	0.527522	0.147591	3.57422	0.000351269	0.00683206	210.774	200.834	263.518	281.881
ENSMUSG00000035722.15	Abca7	405.63	-0.85102	0.238162	-3.57328	0.000352544	0.00684937	4.92992	5.13554	2.75823	2.39678
ENSMUSG00000024423.5	Impact	3519.8	0.583404	0.163436	3.56961	0.000357512	0.00693831	54.3519	51.4802	69.0112	76.6971
ENSMUSG00000026426.10	Arl8a	792.443	-0.68406	0.191674	-3.56886	0.000358531	0.00695051	42.2561	36.9981	23.5666	21.7632
ENSMUSG00000057706.6	Mex3b	3463.71	-0.537781	0.150766	-3.56699	0.0003611	0.00699268	81.9228	73.6021	51.9998	46.5634
ENSMUSG00000027201.16	Myef2	7820.19	0.567453	0.159114	3.56634	0.000362006	0.00700259	160.876	140.607	195.193	214.776
ENSMUSG00000021932.13	Rnaseh2b	1245.65	0.624463	0.175129	3.56572	0.000362853	0.00701134	41.9117	39.7561	56.438	59.293
ENSMUSG00000026837.15	Col5a1	6155.77	-0.518587	0.145489	-3.56444	0.000364628	0.007038	59.7214	51.7908	36.8536	34.6828
ENSMUSG00000043670.4	Diras1	37.5074	-2.48892	0.698543	-3.56302	0.000366617	0.00706872	1.57736	1.20352	0.285182	0.170306
ENSMUSG00000027793.6	Ccna1	42.9734	-2.21408	0.622153	-3.55874	0.000372638	0.00717702	4.39766	3.82887	0.920564	0.702571
ENSMUSG00000027823.9	Gmps	9842.72	0.687509	0.193428	3.55433	0.00037894	0.00729049	65.8878	54.3058	79.1682	98.0843
ENSMUSG00000053199.13	Arhgap20	168.413	1.20533	0.339323	3.55215	0.000382093	0.00734321	1.04865	0.916258	1.92781	2.21721
ENSMUSG00000004791.6	Pgf	486.253	1.20033	0.337953	3.55176	0.000382665	0.00734627	8.88548	14.8681	22.8899	27.9238
ENSMUSG00000098387.2	Pet117	121.769	-1.75176	0.49342	-3.55025	0.00038487	0.00738061	11.6641	22.837	4.76412	4.77374
ENSMUSG00000020894.16	Vamp2	896.317	-0.862388	0.242988	-3.5491	0.000386553	0.00740491	54.1541	36.2996	23.1457	22.3494
ENSMUSG00000026109.14	Tmeff2	120.42	-1.61163	0.454145	-3.54871	0.000387128	0.00740794	3.78998	3.25909	1.39561	0.73632
ENSMUSG00000021567.14	Nkd2	336.495	-1.07448	0.303019	-3.54592	0.000391245	0.00747854	8.95862	5.89816	3.47971	2.96957
ENSMUSG00000025592.17	Dach2	328.005	1.03855	0.292909	3.54564	0.000391659	0.00747854	3.68273	3.27381	5.66171	7.41078
ENSMUSG00000074863.4	Platr25	61.0474	2.13607	0.602536	3.54514	0.000392406	0.00748476	1.12397	0.517611	2.88042	3.34528
ENSMUSG00000030655.14	Smg1	4933.47	0.655836	0.185044	3.54422	0.000393772	0.00750277	22.6622	17.5452	27.5195	30.4882
ENSMUSG00000015957.11	Wnt11	175.309	1.42667	0.402593	3.54371	0.000394538	0.00750931	3.18547	5.32517	11.8727	9.73152
ENSMUSG00000049556.4	Lingo1	88.6569	-1.5998	0.45149	-3.54338	0.000395037	0.00751077	2.54065	3.21816	0.919631	0.83617
ENSMUSG00000028822.11	Tmem50a	1467.2	-0.574973	0.162328	-3.54205	0.000397032	0.00753258	97.7564	92.1445	60.1952	57.1073
ENSMUSG00000071604.4	Fam189a2	131.419	-1.29273	0.364955	-3.54215	0.00039688	0.00753258	5.06247	4.40144	1.91701	1.61626
ENSMUSG00000001555.10	Fkbp10	1851.01	-0.569194	0.160757	-3.54072	0.000399044	0.00756269	66.5066	58.4875	39.5614	37.8428
ENSMUSG00000022672.8	Prkdc	1741.49	0.72484	0.204765	3.53986	0.000400332	0.00757903	7.9266	6.14623	9.88929	11.3728
ENSMUSG00000042129.8	Rassf4	950.92	0.835292	0.236085	3.5381	0.000403012	0.00762165	6.19346	8.22265	12.0698	11.8081
ENSMUSG00000030760.14	Acer3	612.111	0.76191	0.215386	3.53741	0.000404065	0.00763344	2.83418	2.61243	4.01797	4.4553
ENSMUSG00000030929.16	Eri2	1562.02	0.690367	0.195346	3.53408	0.0004092	0.00772224	16.348	17.1034	22.8936	26.7864
ENSMUSG00000034255.17	Arhgap27	415.869	-0.855316	0.242188	-3.53161	0.000413033	0.00778631	12.5898	10.0979	5.96729	5.51243
ENSMUSG00000054667.7	Irs4	734.292	-1.52217	0.431254	-3.52965	0.000416115	0.00783609	16.1961	6.38406	4.55749	2.61501
ENSMUSG00000031231.4	Cox7b	3274.19	0.610848	0.173076	3.52936	0.000416571	0.00783639	214.943	239.711	312.035	328.16
ENSMUSG00000014329.14	Bicc1	1115.14	0.944035	0.267678	3.52676	0.000420684	0.00787294	7.78688	11.7966	17.2764	17.7336
ENSMUSG00000029326.13	Enoph1	1092.88	0.628181	0.178119	3.52675	0.000420697	0.00787294	36.3754	34.0938	49.0964	50.9997
ENSMUSG00000029547.10	Ints1	3099.1	-0.515464	0.146159	-3.52673	0.000420729	0.00787294	58.8453	54.7393	36.8975	36.1789
ENSMUSG00000034640.9	Tiparp	2320.53	0.661011	0.187402	3.52723	0.000419928	0.00787294	27.8141	28.8437	37.9087	44.503
ENSMUSG00000041390.18	Mdfic	1219.77	1.24471	0.352856	3.52754	0.000419448	0.00787294	13.3802	19.457	25.2591	46.4383
ENSMUSG00000040565.7	Btaf1	3659.23	0.644373	0.182735	3.52626	0.000421466	0.00787844	25.8733	25.2089	33.3044	40.0136
ENSMUSG00000048965.8	Mrgpre	103.731	-1.52479	0.432533	-3.52526	0.000423071	0.00790013	2.75199	2.52973	1.01927	0.669843
ENSMUSG00000003153.10	Slc2a3	3570.73	-0.733684	0.208159	-3.52463	0.000424077	0.00791062	70.7739	63.2794	43.8072	30.532
ENSMUSG00000027977.15	Ndst3	157.136	-1.32514	0.376115	-3.52322	0.000426332	0.00793603	3.07925	2.35849	1.178	0.814513
ENSMUSG00000036002.12	Fam214b	382.696	-0.863807	0.245166	-3.52336	0.000426111	0.00793603	15.4675	12.5816	7.28165	6.82828
ENSMUSG00000019066.13	Rab3d	245.276	-0.970898	0.275621	-3.52258	0.000427365	0.00794156	6.32417	6.00828	2.94631	2.84874
ENSMUSG00000022475.18	Hdac7	2318.76	-0.662693	0.188132	-3.52248	0.000427523	0.00794156	80.8001	71.0575	49.8888	38.4776
ENSMUSG00000004207.14	Psap	6003.81	-0.550175	0.156223	-3.52172	0.000428754	0.00795612	174.177	172.601	118.902	99.5207
ENSMUSG00000034220.7	Gpc1	4452.46	-0.676024	0.191996	-3.52104	0.000429866	0.00796843	101.036	75.0377	54.713	46.4418
ENSMUSG00000046280.9	She	700.484	-0.887268	0.252047	-3.52025	0.000431145	0.00798382	9.07088	11.6683	5.75123	4.656
ENSMUSG00000029822.15	Osbpl3	488.143	-0.764147	0.217119	-3.51948	0.000432387	0.00799849	10.1986	10.0645	5.47661	5.5044
ENSMUSG00000095118.1	Snord14d	16.9277	4.87543	1.38548	3.51894	0.000433274	0.00800656	0.803234	0.436854	25.2245	20.0707
ENSMUSG00000021929.8	Kpna3	6169.4	0.668104	0.189953	3.5172	0.000436124	0.00805086	81.1469	66.6113	97.4576	117.572
ENSMUSG00000022061.8	Nkx3-1	200.511	-1.38159	0.392974	-3.51572	0.000438568	0.00808757	7.1843	4.5992	2.547	1.59324
ENSMUSG00000035407.8	Kank4	846.386	-0.720435	0.205114	-3.51237	0.00044413	0.00817512	15.5173	12.8666	8.58561	7.23118
ENSMUSG00000062373.7	Tmem65	1847.41	-0.582931	0.165968	-3.51231	0.000444235	0.00817512	40.1123	36.1756	25.0855	21.7945
ENSMUSG00000024942.16	Capn1	391.859	-0.84146	0.239754	-3.50968	0.000448645	0.00824774	10.4008	10.489	5.1903	5.54842
ENSMUSG00000045008.1	9030612E09Rik	42.1209	-2.22545	0.634341	-3.5083	0.000450987	0.00828222	2.78929	2.05999	0.502503	0.431327
ENSMUSG00000020116.7	Pno1	2727.54	0.584357	0.166638	3.50673	0.000453641	0.00832237	88.0238	95.1746	124.854	128.452
ENSMUSG00000032555.9	Topbp1	7445.7	0.595941	0.170006	3.50541	0.000455904	0.00834666	94.923	92.5911	120.011	140.353
ENSMUSG00000037892.13	Pcdh18	6266.06	0.633765	0.180793	3.50546	0.000455812	0.00834666	60.5889	63.6168	81.0015	96.2167
ENSMUSG00000020075.7	Ddx21	7341.46	0.605124	0.172643	3.50506	0.0004565	0.00834833	73.7998	84.0982	107.227	114.201
ENSMUSG00000036644.15	Tbc1d9b	1939.8	-0.58399	0.166625	-3.50481	0.000456934	0.00834833	41.4108	34.8734	24.021	22.6992
ENSMUSG00000042873.11	Lhfpl4	84.6353	-1.59641	0.455569	-3.5042	0.000457976	0.00835876	1.59946	1.90059	0.58208	0.488599
ENSMUSG00000071177.4	Serpina1d	37.2692	3.42233	0.976928	3.50316	0.000459779	0.00838308	0.110108	0.452266	4.34482	1.55482
ENSMUSG00000035891.16	Cerk	697.092	-0.789821	0.225503	-3.50248	0.000460942	0.00839567	14.7147	11.0095	7.0935	6.52647
ENSMUSG00000040891.6	Foxa3	24.4346	4.34643	1.24157	3.50076	0.000463925	0.00844134	0	0.116021	2.06022	0.690433
ENSMUSG00000061517.8	Sox21	357.821	-0.973148	0.278019	-3.50029	0.000464747	0.00844767	8.57787	7.53632	3.29018	4.23016
ENSMUSG00000036834.16	Plch1	676.028	-0.886323	0.253494	-3.49643	0.000471533	0.00856226	12.2874	11.0246	4.91552	6.64991
ENSMUSG00000022752.8	Tomm70a	7614.7	0.514691	0.147255	3.49524	0.000473636	0.00858715	107.113	106.704	136.932	144.121
ENSMUSG00000029309.7	Sparcl1	3297.65	0.585915	0.167639	3.49511	0.00047387	0.00858715	60.3117	62.9329	92.9357	77.8713
ENSMUSG00000020572.7	Nampt	3010.14	0.62533	0.179016	3.49315	0.000477367	0.0086417	32.389	34.6076	44.6261	50.5234
ENSMUSG00000070691.10	Runx3	37.3267	-3.02032	0.865287	-3.49054	0.000482047	0.00871755	0.730514	1.57296	0.202718	0.064828
ENSMUSG00000045534.4	Kcna5	187.89	-1.11268	0.3188	-3.49021	0.000482639	0.00871938	6.16198	5.41235	2.72383	2.19899
ENSMUSG00000019960.7	Dusp6	3387.13	-0.598722	0.171567	-3.48972	0.000483533	0.00872667	91.094	96.6877	62.617	51.9026
ENSMUSG00000050272.9	Dscam	26.7805	-2.84284	0.814822	-3.48891	0.000484994	0.00874415	0.465159	0.339093	0.048534	0.053515
ENSMUSG00000020182.16	Ddc	652.321	0.950464	0.272569	3.48706	0.000488361	0.00879594	13.1207	18.5709	27.1114	29.7064
ENSMUSG00000004018.9	Fancl	1712.19	0.697197	0.200085	3.4845	0.000493053	0.00887146	33.0178	32.8413	44.1507	53.9644
ENSMUSG00000037012.18	Hk1	1311.15	-0.607647	0.174485	-3.48252	0.000496723	0.00892847	26.2108	27.537	16.4489	16.0733
ENSMUSG00000027433.5	Xrn2	6972.27	0.676746	0.194425	3.48076	0.000499996	0.00897821	118.824	95.4275	141.486	172.063
ENSMUSG00000021990.15	Spata13	776.797	-0.759092	0.2181	-3.48047	0.000500526	0.00897867	14.8402	11.695	7.82786	6.54294
ENSMUSG00000001930.17	Vwf	1410.5	-0.731229	0.210185	-3.47898	0.000503323	0.00901973	15.4903	18.8224	10.334	8.80606
ENSMUSG00000035863.13	Palm	2670.84	-0.586849	0.168754	-3.47755	0.000506025	0.00905171	87.3008	76.4518	54.6596	45.653
ENSMUSG00000066000.12	2610305D13Rik	661.612	0.784598	0.225622	3.47749	0.000506126	0.00905171	13.7973	10.5458	18.7497	19.5526
ENSMUSG00000034112.8	Atp2c2	240.149	1.48404	0.426851	3.47673	0.000507568	0.00906837	2.17113	2.84753	4.52335	8.43281
ENSMUSG00000029670.12	Ing3	1415.44	0.882546	0.253945	3.47534	0.000510206	0.00910212	26.7223	23.7059	34.4906	50.6113
ENSMUSG00000086290.8	Snhg12	672.477	0.792619	0.228079	3.4752	0.00051048	0.00910212	40.1223	47.8144	75.4	66.0048
ENSMUSG00000026193.15	Fn1	25150.5	-0.761286	0.219082	-3.47489	0.000511058	0.00910329	488.205	387.909	284.451	191.838
ENSMUSG00000041058.15	Wwp1	2106.39	0.714398	0.205611	3.4745	0.000511798	0.00910734	18.618	15.2612	22.8587	28.0137
ENSMUSG00000032374.14	Plod2	4193.66	0.710944	0.204651	3.47393	0.00051289	0.00911764	58.4658	66.0126	83.5931	103.919
ENSMUSG00000028618.11	Tmem59	3170.75	-0.512428	0.147567	-3.47251	0.000515625	0.00915711	153.109	151.394	101.864	94.7697
ENSMUSG00000062393.13	Dgkk	288.583	-1.16971	0.336893	-3.47205	0.000516501	0.00916352	4.56266	2.6969	1.52683	1.41291
ENSMUSG00000026764.15	Kif5c	1720.05	-0.577759	0.166419	-3.47171	0.00051715	0.00916588	21.1894	20.9463	12.6765	13.3019
ENSMUSG00000052125.16	F730043M19Rik	89.7603	1.63661	0.471495	3.4711	0.00051834	0.00917782	0.753436	0.942376	2.8883	2.07751
ENSMUSG00000001076.6	C1ql4	17.33	-4.68309	1.34939	-3.47052	0.000519452	0.00918835	2.14395	2.82603	0.189479	0
ENSMUSG00000025666.16	Tmem47	2078.23	0.694794	0.200374	3.46749	0.000525334	0.00928317	27.8695	23.312	34.3069	41.534
ENSMUSG00000020546.14	Stxbp4	1957.17	0.574334	0.165724	3.46561	0.000529036	0.00933003	19.4969	18.2001	24.9283	26.6558
ENSMUSG00000081865.1	Gm15484	437.012	0.949942	0.274087	3.46585	0.000528564	0.00933003	23.3129	23.0652	48.9254	33.8921
ENSMUSG00000011832.15	Evi5l	617.773	-0.799005	0.230682	-3.46367	0.000532863	0.00938822	25.7056	21.4718	11.434	13.3947
ENSMUSG00000033102.14	Cdc14b	2009.86	0.623759	0.18011	3.46321	0.000533769	0.00939487	18.9484	20.3967	26.6869	29.1956
ENSMUSG00000026418.16	Tnni1	503.023	-1.45165	0.419293	-3.46215	0.000535875	0.00941345	32.3186	76.1816	18.0876	18.9354
ENSMUSG00000029486.13	Mrpl1	1197.37	0.721995	0.208544	3.46207	0.000536047	0.00941345	24.5702	18.0719	32.5659	31.68
ENSMUSG00000038379.15	Ttk	2641.48	0.684286	0.197663	3.46188	0.000536414	0.00941345	49.7879	45.9137	62.6499	78.3921
ENSMUSG00000026204.15	Ptprn	98.9298	-1.63829	0.47341	-3.46062	0.000538939	0.00944844	2.45404	3.77173	1.04733	0.816641
ENSMUSG00000049932.3	H2afx	4869.44	-0.520019	0.150283	-3.46025	0.000539666	0.00945187	281.409	253.451	183.267	160.01
ENSMUSG00000051747.14	Ttn	103.287	-1.47461	0.42622	-3.45975	0.000540674	0.00946019	0.084928	0.11045	0.033688	0.032376
ENSMUSG00000036902.9	Neto2	1583.75	0.747654	0.216177	3.45853	0.000543136	0.00949393	15.4247	11.8528	19.0409	22.8085
ENSMUSG00000017291.13	Taok1	4893.32	0.784637	0.226891	3.45821	0.000543771	0.00949569	22.6605	16.1982	26.9373	34.1955
ENSMUSG00000057278.8	Snrpg	3717.64	0.699652	0.202374	3.45722	0.000545781	0.00952143	254.369	301.367	469.571	366.2
ENSMUSG00000000531.4	Grasp	328.383	-0.924608	0.26778	-3.45287	0.000554656	0.00966644	14.3539	13.1725	7.55145	5.82443
ENSMUSG00000028468.15	Rgp1	1792.4	-0.76386	0.221241	-3.45262	0.00055518	0.00966644	38.1946	30.7854	16.1901	20.9567
ENSMUSG00000000093.6	Tbx2	2740.15	-0.948736	0.275093	-3.44878	0.00056312	0.00979509	76.8114	52.1191	37.9898	23.4682
ENSMUSG00000041817.13	Fam169a	1029.58	0.696667	0.202044	3.44809	0.000564558	0.0098105	11.2426	10.9932	15.2966	17.8247
ENSMUSG00000083282.2	Ctsf	503.205	-0.91829	0.266369	-3.44743	0.000565938	0.00982488	25.8006	17.4041	10.5665	10.3075
ENSMUSG00000021116.9	Eif2s1	7239.56	0.603846	0.17528	3.44504	0.000570976	0.00989303	101.318	115.622	145.952	157.982
ENSMUSG00000037622.14	Wdtc1	1456.64	-0.578097	0.167797	-3.44521	0.000570606	0.00989303	29.0138	27.0744	18.3468	16.2459
ENSMUSG00000021464.14	Ror2	1302.62	-0.931797	0.270558	-3.44399	0.000573202	0.00991226	30.9176	24.6806	16.7464	10.1274
ENSMUSG00000027716.13	Trpc3	156.834	-1.39002	0.403579	-3.44423	0.000572685	0.00991226	5.0092	4.68135	2.1866	1.24941
ENSMUSG00000036109.17	Mbnl3	398.549	1.01894	0.295962	3.44282	0.000575684	0.00994552	4.43542	3.56543	6.22393	8.52852
ENSMUSG00000028676.17	Srsf10	3516.93	0.654876	0.190233	3.4425	0.000576359	0.00994751	112.893	110.871	144.921	178.635
ENSMUSG00000022382.14	Wnt7b	395.507	1.43209	0.416086	3.4418	0.000577855	0.00996366	2.71435	5.26877	7.86705	12.2068
ENSMUSG00000026640.12	Plxna2	2891.33	-0.540608	0.157131	-3.44049	0.000580658	0.0100023	21.4414	20.9756	14.4202	12.4615
ENSMUSG00000058672.6	Tubb2a	3866.61	-0.545235	0.158499	-3.43998	0.000581749	0.0100114	179.27	193.472	118.534	117
ENSMUSG00000029169.11	Dhx15	13866.7	0.555513	0.161527	3.43914	0.000583573	0.0100331	254.23	250.707	318.498	363.535
ENSMUSG00000037474.13	Dtl	4094.16	0.702278	0.204471	3.43461	0.000593398	0.0101921	44.5082	52.1305	65.6464	79.2107
ENSMUSG00000079614.3	Seh1l	6541.46	0.605316	0.176275	3.43393	0.000594896	0.010208	89.8765	99.9328	125.479	140.474
ENSMUSG00000060477.14	Irak2	123.814	-1.36238	0.396934	-3.43227	0.000598559	0.0102609	8.92018	9.47419	3.90764	2.73986
ENSMUSG00000022098.9	Bmp1	3183.89	-0.637038	0.185787	-3.42885	0.000606137	0.0103808	74.9901	58.3843	42.8074	35.96
ENSMUSG00000002393.14	Nr2f6	1891.19	-0.676876	0.197465	-3.42783	0.000608419	0.0104099	83.6383	70.7341	50.3679	38.5441
ENSMUSG00000108218.1	Olfr1372-ps1	70.0295	1.79142	0.522963	3.42552	0.000613615	0.0104887	1.81977	1.1413	4.30922	4.85613
ENSMUSG00000055538.7	Zcchc24	1577.11	-0.626554	0.182981	-3.42415	0.000616727	0.0105318	27.4781	29.8756	18.4463	15.8639
ENSMUSG00000024799.14	Tm7sf2	446.246	-0.77064	0.225139	-3.42295	0.000619464	0.0105582	31.7708	31.6522	18.106	16.1876
ENSMUSG00000037149.9	Ddx1	9610.31	0.52077	0.152134	3.4231	0.000619117	0.0105582	203.7	201.992	256.353	278.912
ENSMUSG00000098948.1	Gm27640	30.3341	-5.0955	1.48882	-3.42251	0.000620462	0.0105651	1.49083	48.7648	0.6307	0.594379
ENSMUSG00000032215.15	Rsl24d1	3551.96	0.534013	0.156078	3.42145	0.000622884	0.0105962	121.854	120.937	156.652	166.803
ENSMUSG00000019792.7	Trmt11	691.908	0.791865	0.231531	3.42012	0.000625937	0.0106379	15.9801	11.867	21.3126	22.6876
ENSMUSG00000050244.8	Heatr1	5182.17	0.606435	0.177343	3.41957	0.000627211	0.0106494	38.3999	42.4414	53.3934	59.9628
ENSMUSG00000041763.14	Tpp2	5495.22	0.55151	0.161322	3.41869	0.000629229	0.0106735	73.3969	63.0276	87.9272	95.5001
ENSMUSG00000001119.7	Col6a1	551.19	-0.867064	0.253784	-3.41654	0.000634221	0.0107451	13.7716	10.7767	7.0632	5.29808
ENSMUSG00000022935.14	Grik1	55.696	-2.99808	0.877567	-3.41635	0.000634663	0.0107451	2.59608	1.95408	0.475598	0.054701
ENSMUSG00000022610.9	Mapk12	711.616	-0.671245	0.196539	-3.41533	0.000637055	0.0107754	30.0134	29.6205	16.9894	17.4684
ENSMUSG00000057378.14	Ryr3	287.046	2.07934	0.608912	3.41485	0.000638163	0.0107839	0.493798	2.2285	7.07838	4.06928
ENSMUSG00000002068.16	Ccne1	2294.1	0.522114	0.152966	3.41327	0.000641886	0.0108057	63.2529	61.4385	85.7134	79.2001
ENSMUSG00000004562.16	Arhgef40	2764.41	-0.827174	0.242301	-3.41382	0.000640578	0.0108057	89.3047	63.9362	47.0714	32.3456
ENSMUSG00000026245.16	Farsb	3602.78	0.492513	0.144286	3.41346	0.000641434	0.0108057	101.622	95.1114	128.137	126.418
ENSMUSG00000089762.3	Ier5l	1065.66	-0.618909	0.181318	-3.41339	0.000641601	0.0108057	31.8999	30.1232	19.9653	17.2457
ENSMUSG00000075394.4	Hoxc4	420.318	0.920004	0.269865	3.40913	0.000651714	0.0109608	8.01128	10.4189	16.2128	16.2353
ENSMUSG00000022321.15	Cdh10	242.433	1.42598	0.418511	3.40727	0.000656153	0.011022	2.09538	3.7785	6.09824	8.61804
ENSMUSG00000042590.16	Ipo11	5284.14	0.670312	0.19674	3.40709	0.000656597	0.011022	60.0441	69.381	86.3863	103.328
ENSMUSG00000004031.13	Brinp2	45.1532	-2.23501	0.656214	-3.40592	0.000659404	0.0110483	0.880432	1.18804	0.259311	0.148615
ENSMUSG00000020032.14	Nuak1	2943	-0.907798	0.266519	-3.40612	0.000658923	0.0110483	59.6983	33.7547	22.2509	23.1903
ENSMUSG00000096847.1	Tmem151b	723.181	-0.6718	0.197328	-3.40448	0.000662912	0.0110966	12.5212	11.1212	6.71227	6.90705
ENSMUSG00000034031.5	Ccdc182	15.9129	-4.11125	1.20803	-3.40326	0.000665862	0.0111355	1.70022	1.51645	0.131257	0.041938
ENSMUSG00000032449.13	Slc25a36	4063.66	0.734916	0.216069	3.40129	0.000670676	0.0112055	67.0486	50.3973	79.2986	99.3447
ENSMUSG00000029313.18	Aff1	1011.15	-0.81422	0.239481	-3.39993	0.00067402	0.0112508	12.8187	8.98593	6.31114	5.04671
ENSMUSG00000020811.16	Wscd1	107.368	-1.53076	0.450392	-3.39872	0.000677016	0.0112902	5.17411	3.12562	1.25423	1.33216
ENSMUSG00000086096.1	Gm12688	127.395	1.32555	0.390111	3.39789	0.000679071	0.0113138	6.00083	7.20634	17.0337	13.9077
ENSMUSG00000026113.17	Inpp4a	696.407	-0.908387	0.267398	-3.39714	0.000680947	0.0113239	15.889	15.838	9.52777	6.06833
ENSMUSG00000026814.16	Eng	1047.47	-0.803656	0.236557	-3.3973	0.000680547	0.0113239	25.503	33.9831	15.7945	15.7648
ENSMUSG00000022438.6	Parvb	1659.55	-0.712383	0.20979	-3.3957	0.000684545	0.011373	37.1437	35.9574	23.9754	17.2284
ENSMUSG00000002107.18	Celf2	2281.23	-0.642589	0.189349	-3.39368	0.000689597	0.0114463	29.6336	33.8888	20.4949	17.1317
ENSMUSG00000025105.8	Bnc1	363.865	-1.24909	0.368181	-3.3926	0.000692317	0.0114807	5.3197	8.75465	3.3074	2.22968
ENSMUSG00000022754.5	Tmem45a	301.138	1.00897	0.297504	3.39145	0.000695235	0.0115184	4.7717	6.03463	11.1341	9.10767
ENSMUSG00000032852.3	Rspo4	25.5826	-3.40956	1.00576	-3.39002	0.000698882	0.011568	1.96647	0.608625	0.133305	0.085185
ENSMUSG00000073436.11	Eme2	844.523	-0.653459	0.193034	-3.3852	0.000711259	0.0117619	18.6966	18.7864	10.6449	11.2909
ENSMUSG00000038456.9	Dennd2a	2208.87	-0.577697	0.170734	-3.38361	0.000715395	0.0118193	49.3543	42.3963	30.516	26.0057
ENSMUSG00000026443.3	Lrrn2	107.066	-1.34459	0.39767	-3.38116	0.000721816	0.0119143	3.04875	2.72584	1.13531	0.953699
ENSMUSG00000053166.14	Cdh22	33.21	-2.4275	0.718054	-3.38067	0.000723105	0.0119245	1.06156	0.896356	0.198645	0.134467
ENSMUSG00000008475.13	Arpc5	1696.22	-1.32245	0.391405	-3.37874	0.000728197	0.0119974	127.691	47.4762	35.7992	27.9832
ENSMUSG00000029101.14	Rgs12	1908.74	-0.530521	0.157083	-3.37734	0.000731917	0.0120363	48.3202	43.7647	29.7108	28.8927
ENSMUSG00000070576.4	Mn1	1443.79	-0.789433	0.233741	-3.37738	0.000731799	0.0120363	21.1588	14.0051	9.7877	8.82608
ENSMUSG00000030519.14	Apba2	380.776	-0.793989	0.235131	-3.3768	0.000733356	0.0120489	10.7309	10.6632	5.71197	5.66108
ENSMUSG00000059493.13	Nhs	848.315	0.773371	0.229162	3.37478	0.000738757	0.0121264	5.3468	3.87917	6.92586	7.45293
ENSMUSG00000045658.16	Pid1	299.545	-0.919322	0.272453	-3.37424	0.000740187	0.0121387	9.16299	10.439	4.73618	4.83955
ENSMUSG00000016763.14	Scube1	2774.95	-0.784937	0.232796	-3.37178	0.000746828	0.0122363	35.0602	25.7782	19.0723	13.3946
ENSMUSG00000021950.15	Anxa8	192.19	1.46293	0.433974	3.37101	0.000748935	0.0122595	2.96669	3.96088	6.45173	11.2794
ENSMUSG00000057967.12	Fgf18	49.8711	-1.92164	0.570193	-3.37015	0.000751266	0.0122863	4.50178	4.83197	1.15653	1.13143
ENSMUSG00000029430.13	Ran	23249.9	0.525963	0.156122	3.36893	0.000754615	0.0123298	487.201	528.637	656.954	690.369
ENSMUSG00000066720.6	Cldn9	307.294	-0.868823	0.258197	-3.36497	0.000765526	0.0124966	18.5353	17.1889	9.69468	8.30696
ENSMUSG00000037674.15	Rfx7	2906.9	0.65515	0.194761	3.36387	0.000768584	0.012535	24.3647	19.5593	29.0774	34.2195
ENSMUSG00000070394.10	Tmem256	711.167	0.718016	0.213481	3.36337	0.000769965	0.012546	61.4375	51.7391	93.4457	77.6202
ENSMUSG00000021711.16	Trappc13	2201	0.566226	0.168387	3.36264	0.000772011	0.0125627	46.627	40.1603	57.1832	60.6622
ENSMUSG00000040263.16	Klhdc4	702.515	-0.897927	0.267062	-3.36225	0.00077311	0.0125627	41.9142	29.7017	20.4944	14.7846
ENSMUSG00000078612.9	1700024P16Rik	51.5538	-2.34745	0.698173	-3.36228	0.000773019	0.0125627	1.71088	1.82172	0.490925	0.161012
ENSMUSG00000031438.11	Rnf128	637.85	0.699161	0.207992	3.36148	0.000775264	0.0125775	11.4648	11.3959	18.4187	15.8313
ENSMUSG00000078937.8	Cpt1b	86.5847	-2.9277	0.870973	-3.36142	0.000775438	0.0125775	2.11691	6.13125	0.913977	0.132301
ENSMUSG00000020949.8	Fkbp3	6702.75	0.623074	0.18541	3.36053	0.000777944	0.0126067	329.966	386.138	481.637	535.197
ENSMUSG00000028121.8	Bcar3	355.161	-0.950251	0.282847	-3.35959	0.000780572	0.0126377	15.5574	14.2671	8.40248	5.82526
ENSMUSG00000032796.7	Lama1	1742	0.577745	0.172008	3.35882	0.000782749	0.0126499	9.71748	9.22267	14.1532	11.8899
ENSMUSG00000042379.8	Esm1	52.3937	2.07659	0.618205	3.35906	0.000782075	0.0126499	0.431928	0.752463	2.27626	2.54016
ENSMUSG00000028339.17	Col15a1	957.108	-0.804694	0.239634	-3.35801	0.000785064	0.0126758	15.3117	18.6869	10.2669	7.76707
ENSMUSG00000026519.16	Tmem63a	190.576	-1.16391	0.346636	-3.35772	0.000785872	0.0126774	6.70815	6.19395	3.20409	2.13007
ENSMUSG00000006589.7	Aprt	2643.25	0.58121	0.173148	3.35673	0.000788709	0.0127116	147.597	166.748	224.161	210.249
ENSMUSG00000036502.14	Tmem255a	1116.49	0.862538	0.25706	3.3554	0.000792506	0.0127612	12.5652	18.1136	24.9865	26.7837
ENSMUSG00000028600.15	Podn	49.9295	-2.75382	0.82099	-3.35427	0.000795753	0.0128019	2.53049	0.782302	0.31677	0.124984
ENSMUSG00000026321.7	Tnfrsf11a	71.9788	-1.63068	0.486234	-3.3537	0.000797379	0.0128165	2.52169	1.87827	0.69577	0.592449
ENSMUSG00000024986.11	Hhex	193.734	-1.34968	0.402615	-3.35228	0.000801492	0.0128593	13.0537	7.06296	3.9697	3.20259
ENSMUSG00000038331.15	Satb2	346.543	0.838075	0.249987	3.35247	0.000800946	0.0128593	3.00755	2.5735	4.83769	4.3285
ENSMUSG00000021262.14	Evl	3485.86	-0.570686	0.170291	-3.35124	0.000804512	0.0128961	131.117	120.535	86.648	69.4899
ENSMUSG00000020024.6	Cep83	1788.67	0.6701	0.200068	3.34937	0.000809962	0.0129631	33.0445	26.7276	40.1315	46.9085
ENSMUSG00000057113.13	Npm1	41927	0.59062	0.176341	3.3493	0.000810151	0.0129631	1771.11	1594.33	2099.74	2548.71
ENSMUSG00000054280.14	Prr14l	2195.92	0.554382	0.165616	3.3474	0.000815726	0.0130406	12.5599	12.392	16.2298	17.4832
ENSMUSG00000021108.17	Prkch	540.406	-0.899428	0.268722	-3.34706	0.000816737	0.013045	13.8542	11.8218	7.58959	5.09276
ENSMUSG00000004558.14	Ndrg2	292.708	-1.05072	0.314067	-3.34555	0.000821203	0.0131046	14.0202	9.77501	4.71504	5.73188
ENSMUSG00000022965.7	Ifngr2	677.911	-0.685942	0.205051	-3.34523	0.000822156	0.013108	17.9487	15.2729	9.32487	9.59702
ENSMUSG00000005354.15	Txn2	1250.79	0.756472	0.226166	3.34476	0.00082353	0.0131182	58.8379	77.0288	105.508	106.985
ENSMUSG00000019789.8	Hey2	518.66	-0.767893	0.229655	-3.34368	0.000826754	0.0131455	16.5292	16.4641	8.31277	9.5226
ENSMUSG00000032135.14	Mcam	1766.84	-0.565275	0.16907	-3.34344	0.000827463	0.0131455	46.9702	47.5406	31.5892	27.3436
ENSMUSG00000096006.1	Gm21596	3088.4	0.573892	0.171624	3.34388	0.000826147	0.0131455	120.799	122.075	156.171	176.376
ENSMUSG00000050069.3	Grem2	33.4997	2.80266	0.83835	3.34307	0.000828571	0.0131513	0.060869	0.205096	1.02139	0.844749
ENSMUSG00000025001.11	Hells	5954.22	0.6384	0.191027	3.34193	0.00083198	0.0131937	57.6439	60.2102	75.3294	93.2712
ENSMUSG00000101013.1	A630072M18Rik	43.6492	-3.00702	0.899986	-3.34118	0.000834231	0.0132176	1.52146	0.364763	0.066862	0.135394
ENSMUSG00000025374.13	Nabp2	861.304	-0.611499	0.183103	-3.33965	0.000838834	0.0132787	59.8927	57.8749	35.754	35.1601
ENSMUSG00000029195.10	Klb	57.2737	3.79178	1.13551	3.33929	0.000839934	0.0132843	0.12879	0.178616	3.77323	0.222579
ENSMUSG00000028960.18	Ube4b	5588.57	-0.484283	0.145073	-3.3382	0.000843219	0.0133244	98.8181	89.1777	65.2344	58.4167
ENSMUSG00000031078.15	Cttn	6425.64	-0.509873	0.152937	-3.33388	0.000856436	0.0135212	200.776	167.152	121.024	116.239
ENSMUSG00000078903.10	Gm14391	226.917	1.2837	0.385098	3.33343	0.000857836	0.0135313	4.28379	6.35525	9.94244	13.9452
ENSMUSG00000030268.17	Bcat1	3144.16	0.677476	0.20329	3.33255	0.000860532	0.013558	65.8765	49.1198	93.8133	74.9749
ENSMUSG00000034701.9	Neurod1	610.62	-3.119	0.935968	-3.33238	0.000861054	0.013558	26.2646	25.45	4.52743	1.01542
ENSMUSG00000029094.11	Afap1	1997.35	-0.698621	0.209666	-3.33207	0.00086202	0.0135612	27.8782	22.2146	16.2315	12.1546
ENSMUSG00000030782.15	Tgfb1i1	488.078	-0.728609	0.218723	-3.33119	0.000864764	0.0135923	14.255	14.4111	8.33756	7.60929
ENSMUSG00000022360.7	Atad2	6372.98	0.670263	0.201318	3.32937	0.000870417	0.0136589	59.7918	51.9413	70.9921	91.8593
ENSMUSG00000039781.14	Cep131	1417.02	-0.736555	0.221232	-3.32933	0.000870537	0.0136589	58.0363	43.7601	31.7141	24.3758
ENSMUSG00000029638.17	Glcci1	617.259	-0.844714	0.253819	-3.32802	0.000874661	0.0137115	10.6492	13.2697	5.72494	6.60133
ENSMUSG00000029012.11	Orc5	1827.97	0.570516	0.171512	3.32638	0.000879812	0.013768	45.3247	47.5909	62.1282	65.0324
ENSMUSG00000079487.11	Med12	2502.7	-0.527496	0.158569	-3.32661	0.000879104	0.013768	49.6589	46.5095	32.9515	28.508
ENSMUSG00000032312.6	Csk	3278.15	-0.651014	0.195743	-3.32586	0.000881453	0.0137774	99.2894	88.7747	63.7596	46.6644
ENSMUSG00000078864.10	Gm14322	92.2914	1.52052	0.457202	3.3257	0.000881963	0.0137774	3.71506	2.45974	7.5844	8.36695
ENSMUSG00000079391.10	Gm2974	184.725	1.07574	0.32352	3.32512	0.000883797	0.0137939	3.75139	3.948	7.12973	7.81565
ENSMUSG00000026383.14	Epb41l5	2129.8	0.600134	0.1805	3.32485	0.000884653	0.0137952	19.7853	19.093	25.1279	29.0249
ENSMUSG00000047496.6	Rnf152	123.902	1.64248	0.494073	3.32437	0.000886171	0.0138067	0.509317	0.406034	0.893679	1.70753
ENSMUSG00000022020.14	Naa16	1130.79	0.630289	0.189612	3.32411	0.000887025	0.0138079	17.0967	14.6398	21.5991	23.4081
ENSMUSG00000028445.7	Enho	369.315	-0.789257	0.237498	-3.32321	0.000889869	0.013828	23.8245	23.6935	12.8475	12.4935
ENSMUSG00000092116.1	Gm10320	74.1103	3.28401	0.988169	3.32333	0.000889506	0.013828	1.77973	1.61711	2.59602	27.0716
ENSMUSG00000052137.11	Rbm12b2	1619.61	0.595741	0.179336	3.32193	0.000893969	0.0138674	25.4613	26.3304	34.4282	37.6305
ENSMUSG00000060510.13	Zfp266	10836.8	0.643278	0.193645	3.32195	0.000893907	0.0138674	90.197	83.4566	108.855	139.854
ENSMUSG00000028577.13	Plaa	5046.8	0.548094	0.165067	3.32043	0.000898789	0.01393	89.5828	89.6606	113.27	127.707
ENSMUSG00000010086.17	Rnf112	112.713	-1.78521	0.537859	-3.31911	0.000903056	0.013984	2.93496	4.1619	1.35256	0.571397
ENSMUSG00000019841.15	Rev3l	3378.76	0.852325	0.256869	3.31813	0.000906208	0.0140084	23.6537	15.5398	27.635	36.8546
ENSMUSG00000046861.9	Hectd3	942.563	-0.707439	0.213194	-3.31829	0.000905711	0.0140084	20.7518	16.7294	11.7072	9.38768
ENSMUSG00000050989.9	Sepn1	2430.21	-0.555277	0.167486	-3.31537	0.000915223	0.0141355	61.0968	51.8615	37.7662	32.8939
ENSMUSG00000090386.9	Mir99ahg	439.665	0.866926	0.261524	3.3149	0.000916747	0.0141467	12.951	10.7704	17.7849	21.6879
ENSMUSG00000047832.8	Cdca4	4148.32	0.504706	0.152265	3.31466	0.000917553	0.0141469	98.8327	84.4431	120.375	118.366
ENSMUSG00000090112.8	Shprh	2745.49	0.844333	0.254829	3.31333	0.00092193	0.014202	19.7141	13.0053	23.1911	30.3555
ENSMUSG00000063796.8	Slc22a8	17.3843	7.3609	2.22192	3.31285	0.000923503	0.014214	0	0	1.17897	0.027874
ENSMUSG00000026470.14	Stx6	842.39	-0.642013	0.193861	-3.31171	0.00092726	0.0142594	39.6958	42.4003	24.6356	23.956
ENSMUSG00000006930.15	Hap1	307.215	-0.940878	0.284177	-3.31089	0.000929992	0.0142891	11.5113	8.40952	4.99376	4.50252
ENSMUSG00000042372.4	Dmrt3	41.1116	-2.28868	0.691561	-3.30944	0.000934818	0.0143508	2.14339	1.55792	0.240687	0.441131
ENSMUSG00000079396.4	Gm3411	249.695	0.984994	0.297696	3.30872	0.000937237	0.0143756	5.53488	5.29101	8.97852	10.7543
ENSMUSG00000001025.8	S100a6	86.4692	-1.50419	0.454693	-3.30813	0.000939203	0.0143809	10.0871	12.2741	4.01725	3.30452
ENSMUSG00000001985.9	Grik3	138.209	-1.32025	0.399091	-3.30815	0.000939161	0.0143809	1.72352	1.12708	0.576624	0.465713
ENSMUSG00000055027.17	Smyd1	343.573	0.89759	0.271356	3.3078	0.000940327	0.0143857	4.28514	5.01683	8.76056	7.33317
ENSMUSG00000032254.9	Kif23	3901.48	0.506476	0.153135	3.30738	0.000941735	0.0143949	60.2917	60.9697	77.6555	80.9383
ENSMUSG00000006050.11	Sra1	1962.82	0.695943	0.210706	3.3029	0.000956893	0.014614	63.7103	77.8818	117.335	95.2154
ENSMUSG00000026784.14	Pdss1	478.588	0.749174	0.226919	3.3015	0.000961699	0.0146748	14.8236	13.1643	20.8665	22.294
ENSMUSG00000002319.15	Ipo4	2618.42	-0.885975	0.268411	-3.30082	0.00096403	0.0146858	137.948	83.6131	63.6107	46.2437
ENSMUSG00000021270.13	Hsp90aa1	28602.8	0.600756	0.182003	3.30081	0.000964074	0.0146858	458.66	455.288	568.497	704.238
ENSMUSG00000020124.9	Usp15	3286	0.609784	0.184792	3.29984	0.000967402	0.0147239	53.554	50.4109	65.9669	79.6304
ENSMUSG00000009654.4	Oit3	46.2945	-2.92441	0.887247	-3.29605	0.000980536	0.0148896	0.837886	2.98533	0.347297	0.13009
ENSMUSG00000038784.13	Cnot4	1615.71	0.610168	0.185106	3.29632	0.000979617	0.0148896	26.1531	23.1802	32.3072	36.7282
ENSMUSG00000079553.10	Kifc1	1336.03	-0.805264	0.244317	-3.29598	0.000980801	0.0148896	52.3878	49.2909	32.7421	21.0218
ENSMUSG00000031292.14	Cdkl5	482.276	0.860603	0.261193	3.29489	0.000984592	0.0149344	2.55039	2.03949	3.40651	4.204
ENSMUSG00000023008.18	Fmnl3	2491.41	-0.583347	0.17716	-3.29278	0.000992037	0.0150345	53.0854	42.1565	30.7926	27.5616
ENSMUSG00000057561.9	Eif1a	4552.39	0.52363	0.159236	3.2884	0.00100759	0.0152572	81.5969	85.3976	107.155	113.912
ENSMUSG00000048997.17	Atxn7l2	643.336	-0.650649	0.197935	-3.28719	0.00101194	0.0153099	19.7106	18.5556	11.6351	10.7933
ENSMUSG00000033307.6	Mif	10184.6	0.711272	0.216422	3.28651	0.00101437	0.0153337	751.471	1036.27	1360.32	1347.23
ENSMUSG00000038058.14	Nod1	99.0601	-1.41101	0.429488	-3.28532	0.00101865	0.0153723	1.89516	2.37775	0.78899	0.698366
ENSMUSG00000054150.11	Syne3	54.9973	2.50737	0.763157	3.28553	0.00101792	0.0153723	0.062903	0.300431	1.05149	0.99894
ENSMUSG00000007682.5	Dio2	243.928	1.08077	0.32918	3.28322	0.00102628	0.0154743	1.74926	1.72435	2.83196	3.89598
ENSMUSG00000079491.9	H2-T10	187.507	1.67124	0.509123	3.2826	0.00102856	0.0154955	1.66119	2.91669	9.53481	4.28267
ENSMUSG00000032113.15	Chek1	2712.69	0.750196	0.228616	3.28147	0.00103269	0.0155445	48.1779	43.0499	58.622	81.9457
ENSMUSG00000028496.17	Mllt3	2110.84	0.990308	0.301834	3.28097	0.0010345	0.0155587	18.2696	18.5801	23.9637	43.0801
ENSMUSG00000030741.15	Spns1	1386.13	-0.579048	0.176525	-3.28027	0.00103709	0.0155843	55.3844	46.7188	32.8336	29.907
ENSMUSG00000074892.9	B3galt5	32.07	2.93073	0.893554	3.27985	0.00103861	0.0155941	0.064737	0.109377	0.923774	0.361605
ENSMUSG00000022361.14	Zhx1	2173.46	1.00291	0.306338	3.27388	0.00106081	0.015914	29.2938	16.993	34.0858	50.1716
ENSMUSG00000061808.3	Ttr	576.931	9.48591	2.89997	3.27104	0.00107152	0.0160611	0.187004	0	112.288	2.19316
ENSMUSG00000026739.13	Bmi1	3739.11	0.585726	0.179089	3.27059	0.00107325	0.0160735	54.9124	60.8407	75.7308	84.3372
ENSMUSG00000024892.15	Pcx	860.058	-0.733475	0.224445	-3.26795	0.00108328	0.0161963	16.9169	16.4376	10.7159	7.81675
ENSMUSG00000028373.16	Astn2	182.152	-1.08316	0.331436	-3.26809	0.00108276	0.0161963	3.53817	2.9894	1.28481	1.53309
ENSMUSG00000022674.14	Ube2v2	385.811	0.802141	0.245489	3.26752	0.00108494	0.0162076	16.1509	13.5654	25.4908	22.1202
ENSMUSG00000029771.12	Irf5	249.348	-1.12059	0.343046	-3.26658	0.00108856	0.0162368	15.0891	10.7109	6.51142	4.3734
ENSMUSG00000044477.10	Zfand3	3111.04	-0.528159	0.161688	-3.26653	0.00108873	0.0162368	94.631	86.5334	62.8874	52.8149
ENSMUSG00000025986.6	Slc39a10	7073.48	0.610013	0.186789	3.26579	0.00109158	0.0162658	67.6337	74.3831	91.0343	108.421
ENSMUSG00000012296.15	Tjap1	628.542	-1.49302	0.457306	-3.26481	0.00109536	0.0163084	12.0411	33.4483	8.63945	6.51091
ENSMUSG00000031636.6	Pdlim3	645.305	-0.780381	0.239049	-3.26453	0.00109647	0.0163113	34.8409	31.8758	20.8036	15.0128
ENSMUSG00000038366.15	Lasp1	4133.71	-0.553464	0.169581	-3.26372	0.00109961	0.0163442	109.27	86.8829	64.4037	58.299
ENSMUSG00000041797.7	Abca9	55.6494	-2.23412	0.68468	-3.26301	0.00110237	0.0163717	0.795846	1.04486	0.097918	0.264629
ENSMUSG00000032006.14	Pdgfd	261.259	1.0587	0.324646	3.2611	0.00110982	0.0164685	4.88889	3.91065	7.14443	9.49676
ENSMUSG00000037852.7	Cpe	1895.55	-0.524889	0.161032	-3.25954	0.00111593	0.0165454	72.6115	65.6287	43.6362	44.6501
ENSMUSG00000039913.12	Pak7	164.069	1.24504	0.382063	3.25874	0.00111907	0.0165505	1.17732	1.72283	3.075	3.38089
ENSMUSG00000042035.11	Igsf3	2766.07	-0.552354	0.169487	-3.25898	0.00111813	0.0165505	34.3665	28.7965	21.2851	18.3062
ENSMUSG00000090063.5	Dlx6os1	481.202	-3.24852	0.996854	-3.25877	0.00111897	0.0165505	15.466	9.70113	2.02258	0.430898
ENSMUSG00000041842.15	Fhdc1	510.708	-0.692762	0.212635	-3.25799	0.00112206	0.0165809	9.59861	9.15301	5.34169	5.32735
ENSMUSG00000033316.14	Galnt9	45.8799	-2.38573	0.732396	-3.25743	0.00112428	0.0165999	2.11063	1.3946	0.163473	0.435987
ENSMUSG00000063108.14	Zfp26	3484.7	0.82033	0.252215	3.2525	0.00114394	0.0168762	33.3867	23.2214	38.3368	52.8318
ENSMUSG00000021268.17	Meg3	6972.96	-0.691733	0.212721	-3.25183	0.00114664	0.0169019	212.781	246.057	153.557	109.406
ENSMUSG00000001089.14	Luzp1	5789.74	0.487002	0.149775	3.25156	0.00114772	0.0169039	43.5588	44.3235	55.5484	57.8345
ENSMUSG00000021678.8	F2rl1	75.9601	1.59422	0.490392	3.25091	0.00115038	0.0169291	0.819457	0.934169	2.83142	2.10457
ENSMUSG00000042626.13	Shc1	3409.58	-0.527117	0.162206	-3.24968	0.00115534	0.016988	95.1325	78.6763	57.8553	52.9041
ENSMUSG00000049999.4	Ppp1r3d	397.126	-0.818946	0.252054	-3.24909	0.00115775	0.0170093	9.35369	10.5834	5.64197	4.82957
ENSMUSG00000024287.7	Thoc1	4585.36	0.624416	0.192217	3.2485	0.00116015	0.0170295	66.0786	54.8395	77.0566	93.6524
ENSMUSG00000027680.15	Fxr1	8452.82	0.498036	0.153323	3.24828	0.00116104	0.0170295	164.189	156.347	198.191	217.794
ENSMUSG00000027706.8	Sec62	5259.28	0.456418	0.140523	3.24799	0.00116222	0.0170328	79.7215	72.8939	97.2387	95.3052
ENSMUSG00000017499.15	Cdc6	2422.28	0.704298	0.216965	3.24613	0.00116984	0.0171303	29.1663	31.0702	39.043	51.184
ENSMUSG00000040111.14	Gramd1b	381.882	1.26563	0.38999	3.24529	0.00117331	0.017167	3.24969	5.01993	11.887	6.49888
ENSMUSG00000044288.6	Cnr1	673.866	-0.67625	0.208414	-3.24474	0.00117557	0.0171859	8.97074	9.79299	5.42894	5.4097
ENSMUSG00000021733.9	Slc4a7	2661.6	0.674315	0.207836	3.24446	0.00117673	0.0171887	20.4433	15.4757	23.9865	28.41
ENSMUSG00000026377.12	Nifk	3258.83	0.60045	0.18523	3.24164	0.00118844	0.0173456	85.0986	91.3434	113.612	132.59
ENSMUSG00000032966.14	Fkbp1a	2867.83	-0.955073	0.294692	-3.24092	0.00119147	0.0173612	276.928	140.71	102.413	94.2318
ENSMUSG00000072066.6	6720489N17Rik	572.148	0.931124	0.287294	3.24102	0.00119103	0.0173612	12.2648	7.7526	15.9512	18.7058
ENSMUSG00000059474.13	Mbtd1	4953.17	0.965062	0.297802	3.24062	0.00119271	0.0173651	38.9833	68.7925	89.2574	105.801
ENSMUSG00000038510.12	Rpf2	1400.83	0.963348	0.297399	3.23924	0.00119847	0.0174347	24.3687	41.5573	57.4356	61.9924
ENSMUSG00000028223.8	Decr1	1928.3	0.523502	0.16171	3.23728	0.00120674	0.0175264	36.034	33.3612	44.9465	46.7202
ENSMUSG00000042349.13	Ikbke	102.813	-1.9647	0.606894	-3.2373	0.00120668	0.0175264	2.11107	3.7854	0.415299	0.978171
ENSMUSG00000027223.15	Mapk8ip1	1776.04	-0.576084	0.177969	-3.23698	0.001208	0.0175303	44.9779	49.455	30.9216	27.59
ENSMUSG00000020866.17	Cacna1g	763.729	-1.0861	0.335571	-3.23658	0.0012097	0.0175358	22.3862	13.162	9.60342	5.77691
ENSMUSG00000021182.14	Ccdc88c	1110.62	-0.675583	0.208758	-3.2362	0.00121134	0.0175358	15.8362	12.2503	8.78548	7.34609
ENSMUSG00000041734.15	Kirrel	3944.95	-0.621882	0.192161	-3.23625	0.00121109	0.0175358	47.1614	39.4078	29.5008	22.2856
ENSMUSG00000033717.5	Adra2a	87.0128	-1.61273	0.498887	-3.23267	0.0012264	0.0177394	2.87271	1.60528	0.6595	0.663681
ENSMUSG00000033965.10	Slc16a2	371.253	-1.3362	0.413417	-3.2321	0.00122886	0.0177512	12.3482	5.19205	3.44911	2.85483
ENSMUSG00000052105.16	Mtcl1	739.585	-0.96776	0.299429	-3.23201	0.00122921	0.0177512	13.5112	9.49824	6.69781	4.11206
ENSMUSG00000038872.9	Zfhx3	4347.01	-0.694595	0.214945	-3.23149	0.00123145	0.0177588	26.5264	18.2949	13.9523	11.4529
ENSMUSG00000068457.14	Uty	710.704	0.894492	0.27681	3.23143	0.00123174	0.0177588	7.07962	8.11226	15.944	10.2923
ENSMUSG00000031403.14	Dkc1	3935.95	0.511616	0.158376	3.23039	0.00123621	0.0178089	85.3503	92.1127	121.268	112.214
ENSMUSG00000034685.4	Fam171a2	1379.54	-0.610191	0.188929	-3.22973	0.00123907	0.0178211	37.9241	35.2557	24.627	19.5648
ENSMUSG00000059810.18	Rgs3	1336.13	-0.668368	0.206931	-3.22991	0.00123828	0.0178211	43.6196	40.9189	28.1998	20.8808
ENSMUSG00000021338.17	Lrrc16a	909.666	-0.900475	0.278869	-3.22903	0.00124212	0.0178506	25.287	15.3589	11.0892	8.81472
ENSMUSG00000056025.12	Clca3a1	36.7473	2.80962	0.870246	3.22853	0.00124427	0.0178671	0.06002	0.226059	0.739582	1.27391
ENSMUSG00000028005.13	Gucy1b3	631.13	1.05856	0.328191	3.22545	0.00125776	0.0180316	7.35566	11.0582	14.5817	20.9524
ENSMUSG00000062963.10	Ufc1	1602.86	-0.553923	0.171726	-3.22561	0.00125704	0.0180316	115.275	120.695	73.038	75.0137
ENSMUSG00000004661.15	Arid3b	1958.28	-0.727377	0.225539	-3.22506	0.00125946	0.0180414	57.1518	38.671	25.4448	27.4092
ENSMUSG00000078881.10	Gm14434	264.281	1.66499	0.516316	3.22474	0.00126085	0.0180469	8.82663	2.60982	15.6089	16.7859
ENSMUSG00000079509.10	Zfx	3321.2	0.664512	0.20609	3.22438	0.00126247	0.0180554	28.1445	24.168	33.2162	42.7236
ENSMUSG00000063273.11	Naa15	7492.68	0.606017	0.187968	3.22404	0.00126395	0.0180621	76.2121	57.5185	88.442	97.895
ENSMUSG00000037428.14	Vgf	31.079	-2.33747	0.72525	-3.22299	0.0012686	0.018114	1.28592	1.13441	0.222805	0.215977
ENSMUSG00000023387.7	Kcnk16	32.0661	3.38779	1.05135	3.22232	0.00127156	0.0181417	0	0.720179	3.50946	4.40252
ENSMUSG00000036916.13	Zfp280c	1997.11	0.767947	0.23836	3.2218	0.0012739	0.0181605	31.4779	20.6043	37.9543	42.9335
ENSMUSG00000039883.5	Lrrc17	300.05	-0.925624	0.287382	-3.22088	0.00127797	0.0182038	13.6695	9.98321	5.54509	5.82002
ENSMUSG00000026841.7	Fibcd1	46.9587	-2.00644	0.623161	-3.21978	0.00128289	0.0182593	1.07509	0.961763	0.176369	0.284881
ENSMUSG00000050550.7	Gm11868	442.293	0.873767	0.271432	3.21911	0.00128591	0.0182877	11.7886	15.2047	21.8835	24.0893
ENSMUSG00000029276.13	Glmn	1240.5	0.650686	0.202153	3.21878	0.00128739	0.0182941	41.5557	31.8952	51.3776	54.0678
ENSMUSG00000022206.6	Npr3	1413.58	0.713892	0.221809	3.21849	0.00128867	0.0182977	9.83089	10.0766	13.0497	16.9435
ENSMUSG00000037621.8	Atoh8	493.799	-0.729685	0.226751	-3.218	0.00129088	0.0183144	16.9273	16.776	10.2695	8.50313
ENSMUSG00000025196.4	Cpn1	150.768	2.51568	0.782818	3.21363	0.00131071	0.0185809	0.279286	2.63721	9.78512	6.34927
ENSMUSG00000021703.8	Serinc5	1843.86	0.612593	0.190668	3.21288	0.00131411	0.0186143	16.3371	18.8929	24.159	25.5766
ENSMUSG00000027820.12	Mme	1609.36	0.877356	0.273101	3.21256	0.00131556	0.01862	13.6834	9.31269	15.9376	22.5817
ENSMUSG00000026646.16	Suv39h2	1572.91	0.531583	0.165518	3.21163	0.00131983	0.0186656	29.6427	30.3544	40.8278	39.1131
ENSMUSG00000017978.18	Cadps2	122.941	-1.22912	0.382785	-3.211	0.00132275	0.0186875	2.74946	2.16596	0.917318	0.997436
ENSMUSG00000066113.15	Adamtsl1	116.338	1.24327	0.387211	3.21084	0.00132348	0.0186875	0.816416	0.703208	1.58799	1.70015
ENSMUSG00000039706.11	Ldb2	747.51	-0.860138	0.267997	-3.2095	0.00132965	0.0187449	30.5419	21.3423	11.4499	14.6007
ENSMUSG00000042473.8	Tbc1d8b	229.937	1.30907	0.407846	3.2097	0.00132871	0.0187449	2.50897	1.21677	3.82783	4.47336
ENSMUSG00000001510.8	Dlx3	79.8248	-2.40595	0.750381	-3.20631	0.00134449	0.0189301	4.87977	1.82391	0.903895	0.251531
ENSMUSG00000025037.6	Maoa	1794.03	0.588421	0.183525	3.20622	0.00134493	0.0189301	23.0478	21.298	28.4386	32.7776
ENSMUSG00000046223.10	Plaur	155.486	1.93252	0.602809	3.20586	0.00134659	0.0189385	1.13932	4.1435	11.2323	8.0091
ENSMUSG00000017466.9	Timp2	2678.33	-0.483461	0.150819	-3.20556	0.00134799	0.0189432	57.3416	51.3804	36.4625	35.0178
ENSMUSG00000044167.6	Foxo1	1184.37	0.586441	0.183097	3.2029	0.0013605	0.019104	6.82251	7.22791	9.56748	9.89551
ENSMUSG00000024109.18	Nrxn1	86.3242	-1.99522	0.623251	-3.20132	0.00136801	0.0191942	0.805702	2.18631	0.333519	0.364034
ENSMUSG00000038193.3	Hand2	1905.11	-0.726571	0.227358	-3.19571	0.00139487	0.0195557	82.4395	55.2259	40.8189	35.388
ENSMUSG00000081603.1	Gm14681	6030.66	0.517095	0.161901	3.19389	0.00140368	0.0196636	862.149	697.824	1018.64	1029.06
ENSMUSG00000040997.13	Abhd4	1437.52	-0.641668	0.200963	-3.19296	0.00140823	0.0197119	51.8647	39.4412	26.0543	27.4949
ENSMUSG00000020385.16	Clk4	2880.21	0.565027	0.176995	3.19234	0.00141126	0.0197387	102.118	82.6578	120.535	129.856
ENSMUSG00000039628.8	Hs3st6	61.8633	-2.30834	0.72322	-3.19176	0.0014141	0.0197629	4.19263	6.60019	1.59085	0.455642
ENSMUSG00000027416.2	Otor	102.633	-1.33744	0.419081	-3.19137	0.00141602	0.0197742	9.82292	10.1089	4.20904	3.07395
ENSMUSG00000039841.14	Zfp800	449.19	0.728375	0.228316	3.19021	0.0014217	0.0198224	6.22566	5.98601	8.99298	9.58858
ENSMUSG00000108046.1	RP23-318B18.1	26.7625	2.7872	0.87366	3.19026	0.00142144	0.0198224	0.328281	0.194217	1.2425	1.92085
ENSMUSG00000038175.9	Mylip	739.299	-0.657294	0.2061	-3.1892	0.00142666	0.019876	18.1453	19.8631	11.7426	10.5255
ENSMUSG00000043557.15	Mdga1	213.017	-1.15309	0.361699	-3.18799	0.00143266	0.019944	2.97263	3.78588	1.18616	1.63872
ENSMUSG00000020173.17	Cobl	372.3	0.789583	0.247721	3.18739	0.00143563	0.019954	3.7866	3.33615	6.15404	5.19024
ENSMUSG00000021095.5	Gsc	39.4548	-2.15736	0.6768	-3.18759	0.00143461	0.019954	4.09653	2.45742	0.673082	0.676963
ENSMUSG00000024539.17	Ptpn2	1828.79	0.537204	0.168673	3.18489	0.00144809	0.0201115	59.143	56.4507	74.1776	80.0574
ENSMUSG00000022180.6	Slc7a8	137.387	2.40404	0.755135	3.1836	0.00145457	0.02017	0.864427	0.53377	5.92287	0.981073
ENSMUSG00000042757.15	Tmem108	346.074	-0.940654	0.295468	-3.18361	0.00145451	0.02017	9.13515	12.2458	5.54289	4.80777
ENSMUSG00000016344.14	Ppdpf	1698.46	0.599453	0.188318	3.1832	0.00145655	0.0201817	102.816	117.366	150.523	157.556
ENSMUSG00000035203.15	Epn1	2610.97	-0.481714	0.151352	-3.18274	0.00145889	0.0201984	95.3911	86.3499	62.1334	57.556
ENSMUSG00000021832.7	Psmc6	6932.93	0.582158	0.182935	3.18233	0.00146098	0.0202115	251.953	206.764	289.394	339.69
ENSMUSG00000018042.17	Cyb5r3	3984.99	-0.452732	0.142288	-3.1818	0.00146365	0.0202328	125.424	119.648	83.158	81.5819
ENSMUSG00000058291.14	Zfp68	2012.61	0.64378	0.202347	3.18156	0.00146482	0.0202331	35.0974	27.739	41.3236	48.4938
ENSMUSG00000024376.6	Epb41l4a	777.891	-0.710707	0.223412	-3.18115	0.00146689	0.0202461	18.4877	13.9453	8.78228	9.34559
ENSMUSG00000019917.9	2020-09-10	1697.58	0.592607	0.18634	3.18025	0.00147148	0.0202937	33.9468	34.6981	44.4061	50.8413
ENSMUSG00000038976.12	Ppp1r9b	3830.88	-0.515868	0.162241	-3.17964	0.00147458	0.0203206	65.1722	64.6245	45.7557	37.972
ENSMUSG00000063727.3	Tnfrsf11b	68.2574	-1.87532	0.590016	-3.17843	0.00148077	0.0203901	2.94506	1.97667	0.839954	0.392528
ENSMUSG00000024897.8	Apba1	93.9396	-1.3484	0.424306	-3.17791	0.00148343	0.0204109	1.28369	1.32625	0.521907	0.426773
ENSMUSG00000001376.17	Ccdc132	2144.66	0.546294	0.172	3.17613	0.00149256	0.0205208	33.8218	28.7051	40.506	43.2198
ENSMUSG00000028549.17	Itgb3bp	466.767	0.905741	0.285207	3.17573	0.00149461	0.020533	13.5105	9.01023	21.4837	16.9284
ENSMUSG00000071653.9	1810009A15Rik	794.949	1.33667	0.420944	3.17542	0.00149622	0.0205392	34.1947	38.8824	126.356	45.8323
ENSMUSG00000026034.17	Clk1	5050.67	0.47708	0.150288	3.17444	0.00150128	0.020563	175.238	159.648	208.179	219.982
ENSMUSG00000029695.13	Aass	216.335	1.82263	0.574163	3.17441	0.00150142	0.020563	1.68347	1.63109	8.62212	2.31789
ENSMUSG00000038765.13	Lmx1b	43.1194	-1.93657	0.609974	-3.17484	0.00149918	0.020563	0.994004	0.848685	0.229774	0.209704
ENSMUSG00000049001.5	Ndnf	591.041	-0.863164	0.271989	-3.17352	0.00150603	0.0206102	6.96965	4.56515	2.74165	3.03054
ENSMUSG00000024053.10	Emilin2	448.189	-0.789856	0.24896	-3.17262	0.00151072	0.0206123	9.94814	8.81375	5.67465	4.31294
ENSMUSG00000039943.16	Plcb4	691.483	0.648662	0.204418	3.17321	0.00150763	0.0206123	13.8139	12.2495	18.0972	19.3291
ENSMUSG00000087178.7	A230056P14Rik	69.0961	-1.53139	0.482694	-3.1726	0.00151082	0.0206123	3.12453	3.31694	1.095	0.975071
ENSMUSG00000097679.1	Rps19-ps5	378.271	0.826615	0.260525	3.17288	0.00150936	0.0206123	39.434	47.3591	74.1045	68.654
ENSMUSG00000020687.13	Cdc27	7103.95	0.623796	0.196695	3.17139	0.0015171	0.0206822	76.3748	61.2428	87.1443	106.966
ENSMUSG00000034813.16	Grip1	454.907	-0.78667	0.24811	-3.17065	0.001521	0.0207194	8.24093	8.63807	5.10867	3.94124
ENSMUSG00000022032.14	Scara5	95.3019	1.37565	0.434203	3.16823	0.00153372	0.0208767	1.01421	0.799126	2.3653	1.93895
ENSMUSG00000027082.15	Tfpi	1141.58	0.625234	0.197478	3.16609	0.00154501	0.0210143	32.9704	37.0693	53.6777	46.3045
ENSMUSG00000030352.14	Tspan9	1878.73	-0.654731	0.20685	-3.16524	0.00154956	0.0210159	70.3825	63.1947	45.4073	32.8401
ENSMUSG00000032207.9	Lipc	22.5497	5.55155	1.75394	3.16518	0.00154986	0.0210159	0	0.049195	2.64298	0.157874
ENSMUSG00000035226.5	Rims4	23.8658	-2.66417	0.841684	-3.16528	0.00154933	0.0210159	0.504735	0.561062	0.08493	0.070282
ENSMUSG00000075467.4	Dnlz	1010.88	-0.586779	0.185381	-3.16526	0.00154943	0.0210159	28.6808	25.5897	17.8184	15.4195
ENSMUSG00000103436.1	Gm36995	150.868	-1.77583	0.561314	-3.1637	0.0015578	0.0211074	4.04971	1.29113	0.668089	0.7293
ENSMUSG00000024583.2	Txnl1	6226.52	0.484062	0.15303	3.16319	0.00156052	0.0211282	129.536	131.821	162.905	173.51
ENSMUSG00000027018.11	Hat1	4697.43	0.540529	0.170914	3.16258	0.00156378	0.0211402	148.821	166.34	205.067	217.521
ENSMUSG00000029674.13	Limk1	931.96	-0.694842	0.219723	-3.16236	0.00156497	0.0211402	23.7194	22.7623	11.7214	14.6333
ENSMUSG00000040693.7	Slco4c1	42.2766	3.72972	1.17935	3.16252	0.00156411	0.0211402	0.139338	0.029442	1.7399	0.184635
ENSMUSG00000020577.15	Tspan13	2426.49	-0.477181	0.151011	-3.15992	0.00157815	0.0212925	95.6932	93.4498	64.5938	60.5508
ENSMUSG00000022199.10	Slc22a17	1421.77	-0.578604	0.183126	-3.1596	0.00157984	0.0212925	50.5767	45.2342	32.4224	26.632
ENSMUSG00000029669.14	Tspan12	2747.77	0.511452	0.161864	3.15977	0.00157895	0.0212925	65.5352	62.8488	80.6968	87.5232
ENSMUSG00000002413.15	Braf	2099.69	0.521244	0.165027	3.15854	0.0015856	0.0213378	15.755	13.2526	19.592	18.6237
ENSMUSG00000027004.3	Frzb	959.998	-0.59784	0.189269	-3.15868	0.00158485	0.0213378	25.0037	23.0599	15.8629	13.3845
ENSMUSG00000027428.9	Rbbp9	1991.25	0.580576	0.183824	3.15832	0.0015868	0.0213378	45.3118	50.7578	64.0409	68.4605
ENSMUSG00000009555.16	Cdk9	1598.49	-0.524335	0.166044	-3.1578	0.00158967	0.0213602	78.008	68.0944	48.2802	45.0594
ENSMUSG00000032407.13	U2surp	7106.28	0.999596	0.316781	3.15548	0.00160233	0.0215141	62.0237	44.4215	67.2308	126.524
ENSMUSG00000036390.8	Gadd45a	366.887	-0.835167	0.264737	-3.1547	0.00160662	0.0215553	29.9981	24.6651	15.7875	12.3679
ENSMUSG00000027674.16	Pex5l	53.8419	-2.09124	0.663008	-3.15416	0.00160959	0.0215761	2.07524	0.997208	0.408227	0.24152
ENSMUSG00000063382.5	Bcl9l	1251.03	-0.648641	0.205658	-3.15398	0.00161059	0.0215761	20.9351	16.3209	11.9517	9.86653
ENSMUSG00000024937.14	Ehbp1l1	669.123	-0.636537	0.202043	-3.1505	0.00162992	0.0217857	8.513	8.30448	5.33938	4.62788
ENSMUSG00000043336.14	Filip1l	1662.2	-0.581816	0.184662	-3.1507	0.00162878	0.0217857	34.135	28.4277	18.2599	20.0567
ENSMUSG00000101939.1	Gm28438	11037.8	0.49253	0.15633	3.15059	0.00162943	0.0217857	1632.56	1787.28	2197.53	2237.37
ENSMUSG00000027162.7	Lin7c	5715.91	0.602192	0.191191	3.14968	0.00163448	0.0218303	76.7217	63.9403	88.0752	107.51
ENSMUSG00000015112.15	Slc25a13	2778.82	0.472972	0.150187	3.14921	0.00163711	0.0218491	52.1048	48.3529	63.9008	64.2864
ENSMUSG00000028544.14	Slc5a9	22.3501	3.31299	1.05216	3.14877	0.00163961	0.0218659	0.19794	0.053279	0.949353	0.934835
ENSMUSG00000022016.15	Akap11	3561.24	0.724823	0.230232	3.14823	0.00164263	0.0218898	20.8985	16.1188	23.7872	32.1049
ENSMUSG00000013736.16	Trnt1	2172.33	0.61815	0.196398	3.14743	0.00164712	0.0219171	54.4801	44.7038	63.8865	75.4647
ENSMUSG00000032018.13	Sc5d	1065.98	0.692703	0.220086	3.14743	0.00164714	0.0219171	21.2855	25.2173	32.4065	36.9949
ENSMUSG00000054115.11	Skp2	5599.9	0.4978	0.158205	3.14656	0.00165205	0.021966	94.1012	93.6379	116.101	127.727
ENSMUSG00000030795.18	Fus	12568.1	-0.421479	0.13402	-3.14491	0.0016614	0.0220738	469.458	430.453	313.35	304.565
ENSMUSG00000034258.3	Mfsd7c	89.1355	2.21399	0.704224	3.14387	0.00166728	0.0221353	0.492787	0.672264	4.06741	1.06995
ENSMUSG00000026458.13	Ppfia4	154.532	-1.09673	0.348898	-3.14343	0.00166982	0.0221525	3.23991	2.95255	1.51545	1.14942
ENSMUSG00000022562.13	Oplah	337.675	-0.934978	0.297565	-3.1421	0.00167739	0.0222199	17.0484	11.3753	7.2644	6.33722
ENSMUSG00000048440.15	Cyp4f16	350.976	-0.834954	0.265729	-3.14213	0.00167723	0.0222199	25.95	29.2127	13.4139	15.1449
ENSMUSG00000025962.15	Fastkd2	1287.79	0.583532	0.185741	3.14164	0.00168002	0.0222381	24.9732	21.8071	30.6202	33.6299
ENSMUSG00000023033.14	Scn8a	350.745	-0.912228	0.290535	-3.13982	0.00169052	0.0223488	10.6677	7.22072	4.55193	4.12661
ENSMUSG00000041115.16	Iqsec2	196.974	-0.951332	0.302996	-3.13975	0.0016909	0.0223488	3.37016	3.48297	1.65339	1.6246
ENSMUSG00000038264.7	Sema7a	171.881	-1.15601	0.368303	-3.13874	0.00169674	0.0223962	5.58406	3.77434	2.15932	1.6705
ENSMUSG00000038555.7	Reep2	90.9089	-1.42451	0.453853	-3.1387	0.00169701	0.0223962	5.28666	3.64187	1.42042	1.59398
ENSMUSG00000031442.20	Mcf2l	456.039	-0.922999	0.294108	-3.1383	0.00169929	0.0224097	15.1779	10.1982	7.04244	5.22896
ENSMUSG00000026234.12	Ncl	38726.8	0.424421	0.135305	3.13678	0.00170816	0.02251	296.109	287.002	355.769	364.078
ENSMUSG00000003573.15	Homer3	3219.29	-0.503623	0.160675	-3.13442	0.00172195	0.0226749	128.886	126.388	90.1319	75.8809
ENSMUSG00000069833.12	Ahnak	3473.23	-0.625585	0.19961	-3.13404	0.00172418	0.0226875	15.4222	15.2989	8.02889	10.2508
ENSMUSG00000039461.12	Tcta	377.463	-0.75493	0.240966	-3.13293	0.00173071	0.0227397	20.5331	17.7159	10.9895	9.82917
ENSMUSG00000040808.4	S100g	159.232	8.5188	2.71903	3.13303	0.0017301	0.0227397	0	0.152929	78.7855	1.34126
ENSMUSG00000050288.6	Fzd2	4944.9	-0.457249	0.145969	-3.13251	0.0017332	0.0227556	107.639	93.9997	68.8798	66.073
ENSMUSG00000024081.8	Cebpz	4560.3	0.525293	0.167722	3.13193	0.00173661	0.0227835	60.0333	58.2379	72.9646	83.4539
ENSMUSG00000014226.10	Cacybp	7205.41	0.631771	0.201775	3.13106	0.00174175	0.0228341	152.638	196.026	242.761	256.233
ENSMUSG00000029260.15	Ugt2b34	40.5238	4.25693	1.35984	3.13047	0.00174529	0.0228637	0.105731	0.033511	2.26034	0.080877
ENSMUSG00000031391.18	L1cam	463.328	-0.903672	0.28881	-3.12895	0.00175432	0.022965	17.0503	11.7816	6.27507	7.79491
ENSMUSG00000033735.9	Spr	746.463	-0.601127	0.192148	-3.12846	0.00175726	0.0229866	49.0076	48.1224	30.9151	28.0633
ENSMUSG00000062202.13	Btbd9	1051.25	-0.600964	0.192139	-3.12775	0.00176151	0.0230253	13.245	10.8978	7.76168	6.85278
ENSMUSG00000046667.14	Rbm12b1	1132.27	0.597402	0.191032	3.12724	0.00176454	0.0230479	19.9808	17.9347	24.836	27.7885
ENSMUSG00000035726.7	Supt16	18266.6	0.565518	0.180946	3.12534	0.00177599	0.0231804	206.683	215.628	259.576	314.887
ENSMUSG00000047996.16	Prrg1	494.304	0.898542	0.287609	3.12418	0.00178299	0.0232515	6.40855	5.75554	8.51107	12.2507
ENSMUSG00000098206.1	A430106G13Rik	105.869	1.36345	0.436443	3.12401	0.00178405	0.0232515	1.10839	1.13487	3.19612	2.15765
ENSMUSG00000026175.12	Vil1	83.3716	5.96585	1.91002	3.12345	0.00178745	0.0232629	0.072969	0.046254	6.61975	0.225206
ENSMUSG00000102252.5	Snrpn	1091.78	0.555006	0.177691	3.12343	0.00178754	0.0232629	30.2042	27.7924	38.5822	39.7004
ENSMUSG00000029291.11	Rufy3	1137.36	-0.591559	0.189485	-3.12193	0.00179667	0.0233135	29.0219	26.2842	18.5834	15.2051
ENSMUSG00000030351.5	Tspan11	192.815	-1.16848	0.374244	-3.12223	0.00179485	0.0233135	4.11097	2.57491	1.22143	1.47986
ENSMUSG00000047604.2	Frat2	319.074	-0.926571	0.296792	-3.12195	0.00179656	0.0233135	14.2416	10.8771	7.00546	5.11417
ENSMUSG00000055799.13	Tcf7l1	2125.15	-0.60401	0.193437	-3.12251	0.00179314	0.0233135	63.6306	51.9922	39.0931	30.8756
ENSMUSG00000054690.17	Emcn	1377.64	-0.640595	0.205252	-3.12101	0.00180233	0.0233698	52.5698	63.5215	36.5405	32.4131
ENSMUSG00000028001.16	Fga	474.689	12.1319	3.88765	3.12061	0.00180474	0.023384	0	0	49.3596	0.822429
ENSMUSG00000031539.5	Ap3m2	258.065	-0.872724	0.279714	-3.12006	0.00180816	0.0234046	5.91757	6.46213	3.28151	2.97638
ENSMUSG00000037234.16	Hook3	3616.57	0.631542	0.202422	3.11993	0.00180896	0.0234046	19.5804	16.4096	22.5194	28.5367
ENSMUSG00000052087.13	Rgs14	24.3064	2.86772	0.919814	3.11772	0.00182259	0.0235637	0.096756	0.204439	0.933149	1.22031
ENSMUSG00000026094.14	Stk17b	579.104	0.733583	0.235351	3.11697	0.0018272	0.0236062	8.19987	9.06611	12.32	14.155
ENSMUSG00000032228.16	Tcf12	8199.06	0.541934	0.173926	3.11588	0.00183395	0.0236762	87.0857	102.799	131.565	123.763
ENSMUSG00000081999.3	Gm13461	2819.33	0.523822	0.16819	3.11447	0.00184275	0.0237726	215.918	233.501	291.142	304.489
ENSMUSG00000027405.16	Nop56	4445.27	0.631773	0.202865	3.11425	0.00184412	0.0237729	183.803	208.146	250.167	308.743
ENSMUSG00000047036.7	Zfp445	2321.09	0.676907	0.217382	3.1139	0.00184631	0.023784	40.1399	37.6403	48.7728	65.224
ENSMUSG00000039960.5	Rhou	1851.28	-0.628151	0.201781	-3.11303	0.00185176	0.0238369	48.2898	39.1455	29.3581	22.6806
ENSMUSG00000044499.11	Hs3st5	22.9868	-3.8196	1.22734	-3.11208	0.00185772	0.0238964	0.88268	0.905106	0.119116	0
ENSMUSG00000039197.9	Adk	2789.83	0.56864	0.182807	3.1106	0.00186707	0.0239992	75.275	86.8272	108.014	113.866
ENSMUSG00000039579.15	Grin3a	97.8765	-1.28292	0.412469	-3.11034	0.00186875	0.0240034	1.26636	1.26723	0.516747	0.444528
ENSMUSG00000038047.18	Haus6	3025.59	0.66175	0.212801	3.10971	0.00187274	0.0240374	30.4988	25.5902	35.2678	45.9603
ENSMUSG00000018209.15	Stk4	3367.68	0.497666	0.160223	3.10608	0.00189589	0.0241773	39.152	41.0154	50.9661	53.3236
ENSMUSG00000021413.8	Prpf4b	7258.66	0.639089	0.205675	3.10728	0.00188817	0.0241773	91.0269	73.2668	102.785	131.356
ENSMUSG00000027168.21	Pax6	48.0984	-1.816	0.584547	-3.10668	0.00189203	0.0241773	1.58839	1.6652	0.387044	0.465426
ENSMUSG00000027699.19	Ect2	4093.23	0.618457	0.1991	3.10627	0.00189463	0.0241773	77.7289	55.3292	91.928	94.9286
ENSMUSG00000032080.6	Apoa4	928.088	13.0991	4.21603	3.10697	0.00189014	0.0241773	0	0	123.014	0.911015
ENSMUSG00000037138.16	Aff3	2304.17	-0.655777	0.211105	-3.10641	0.00189377	0.0241773	35.0741	27.813	21.1066	15.6105
ENSMUSG00000041870.16	Ankrd13a	2687.21	-0.486415	0.156551	-3.10707	0.00188949	0.0241773	63.0739	54.2677	39.5266	37.4208
ENSMUSG00000042978.10	Sbk1	6655.12	-0.532232	0.171321	-3.10664	0.00189225	0.0241773	140.456	109.814	84.0765	74.839
ENSMUSG00000049313.8	Sorl1	2143.68	0.71662	0.230594	3.10772	0.0018854	0.0241773	12.7987	9.70177	14.678	19.0824
ENSMUSG00000060475.12	Wtap	3403.48	0.500158	0.161037	3.10586	0.00189725	0.0241774	99.0694	91.8335	135.384	113.321
ENSMUSG00000029843.4	Slc13a4	93.2839	3.28506	1.05807	3.10475	0.00190437	0.0242507	0.208867	0.447438	5.79497	0.321938
ENSMUSG00000009207.15	Lnp	1352.31	0.867876	0.279556	3.10448	0.00190617	0.0242562	24.3864	15.6069	28.1903	38.2114
ENSMUSG00000048583.16	Igf2	46771.8	-0.913643	0.294328	-3.10417	0.00190813	0.0242574	1222.21	594.734	448	431.83
ENSMUSG00000097910.1	5033428I22Rik	122.516	-1.20464	0.388089	-3.10404	0.00190899	0.0242574	6.13624	4.69193	2.04811	2.25921
ENSMUSG00000057657.3	Rps18-ps3	2113.21	0.632476	0.203789	3.10358	0.00191197	0.0242779	218.028	274.208	355.35	350.534
ENSMUSG00000031922.12	Cep57	2181.16	0.682285	0.219889	3.10286	0.00191662	0.0243195	67.8281	46.1693	81.3079	85.7382
ENSMUSG00000026761.12	Orc4	2276.69	0.699931	0.225637	3.10202	0.00192203	0.0243708	52.1905	36.0644	60.7508	70.1037
ENSMUSG00000018001.18	Cyth3	1617	-0.516627	0.166641	-3.10024	0.00193364	0.0244657	34.7125	31.8426	22.8035	20.0077
ENSMUSG00000031465.6	Angpt2	322.82	-0.959378	0.30945	-3.10026	0.00193348	0.0244657	8.78987	7.36586	4.63289	3.01647
ENSMUSG00000044763.8	Trmt10c	1357.53	0.577155	0.186154	3.10042	0.00193249	0.0244657	23.4782	23.2818	30.1793	33.9673
ENSMUSG00000072620.3	Slfn2	83.5906	1.58325	0.51075	3.09986	0.00193615	0.0244801	1.42839	1.76936	3.53001	5.38172
ENSMUSG00000084131.1	Rpl3-ps2	3752.77	0.468529	0.15117	3.09934	0.0019395	0.024505	164.266	169.555	213.268	212.431
ENSMUSG00000022469.16	Rapgef3	136.232	-1.24192	0.400774	-3.0988	0.00194303	0.0245147	5.99761	6.14461	2.91285	1.82949
ENSMUSG00000034412.13	Tbc1d10a	583.408	-0.696382	0.224725	-3.09881	0.00194299	0.0245147	27.0488	26.016	16.9055	13.3103
ENSMUSG00000011884.13	Gltp	637.852	-0.687633	0.221974	-3.09781	0.00194955	0.0245796	32.5472	25.2619	16.42	16.4277
ENSMUSG00000002763.16	Pex6	1554.04	-0.539029	0.174019	-3.09754	0.00195136	0.0245849	41.6201	35.0187	25.4028	23.0353
ENSMUSG00000038677.13	Scube3	3215.97	-0.473461	0.152926	-3.09602	0.00196137	0.0246818	43.0093	37.2085	27.3434	25.7477
ENSMUSG00000051329.13	Nup160	4022.23	0.507969	0.164087	3.09574	0.00196321	0.0246818	43.9546	42.2896	53.1313	59.5786
ENSMUSG00000089922.2	3110039M20Rik	33.5363	3.25043	1.04991	3.09592	0.00196202	0.0246818	0	0.186544	0.880842	0.980623
ENSMUSG00000019256.17	Ahr	357.647	-0.759324	0.245322	-3.09521	0.00196672	0.0246909	5.79843	5.49676	2.95404	3.17386
ENSMUSG00000079043.2	Fastkd5	976.096	0.60349	0.194972	3.09526	0.00196641	0.0246909	19.6318	20.1347	26.5194	29.1273
ENSMUSG00000073164.11	2410018L13Rik	50.2242	-1.84209	0.595432	-3.09369	0.00197681	0.0248002	2.49842	1.95649	0.466958	0.647489
ENSMUSG00000035310.15	Lin54	1159.76	0.595166	0.192505	3.09169	0.00199019	0.0249503	13.7434	13.7887	17.9642	20.2884
ENSMUSG00000025402.12	Nab2	731.017	-0.718666	0.232494	-3.09112	0.00199403	0.0249619	28.3343	21.3045	15.197	12.4801
ENSMUSG00000040044.11	Orc3	2997.82	0.560575	0.18136	3.09095	0.00199517	0.0249619	92.5634	89.2292	112.645	133.532
ENSMUSG00000046873.18	Mbtps2	981.591	0.705984	0.228405	3.09093	0.00199533	0.0249619	15.9181	13.7715	19.5106	24.7999
ENSMUSG00000033039.9	Micall1	1157.04	-0.54269	0.175595	-3.09058	0.00199767	0.0249736	14.1126	12.3195	8.46184	8.20472
ENSMUSG00000042628.7	Zfyve1	1500.96	-0.549978	0.178015	-3.0895	0.00200497	0.0250473	32.3972	27.1575	19.8176	17.5463
ENSMUSG00000021714.14	Cenpk	987.601	0.572508	0.185333	3.08908	0.00200776	0.0250645	45.3165	38.5973	57.8155	56.653
ENSMUSG00000016252.7	Atp5e	2432.29	0.885308	0.286693	3.088	0.00201509	0.0251188	130.033	147.562	307.769	168.628
ENSMUSG00000028850.2	Gpatch3	236.336	-1.01641	0.329189	-3.08761	0.00201773	0.0251188	13.4033	8.91232	4.85624	5.18134
ENSMUSG00000031503.13	Col4a2	8703.29	-0.682219	0.22091	-3.08823	0.00201353	0.0251188	131.938	91.0359	72.3106	55.2915
ENSMUSG00000039704.6	Lmbrd2	464.849	0.716042	0.231908	3.08761	0.00201775	0.0251188	6.51614	5.27337	8.98091	8.73616
ENSMUSG00000025724.12	Sec11a	2527.44	0.663	0.214785	3.08681	0.00202316	0.0251684	135.839	141.937	174.793	229.408
ENSMUSG00000014956.15	Ppp1cb	15329.9	0.595123	0.192867	3.08567	0.00203097	0.0252187	139.948	136.492	167.65	215.556
ENSMUSG00000042106.5	Fam212a	830.96	-0.590973	0.191539	-3.08539	0.00203288	0.0252187	66.6389	59.3796	40.9183	36.0183
ENSMUSG00000049482.15	Ctu2	568.572	-0.86387	0.279986	-3.0854	0.00203276	0.0252187	41.4873	32.3545	22.5021	14.8898
ENSMUSG00000057594.12	Arl16	386.536	0.78532	0.254523	3.08546	0.00203239	0.0252187	16.3668	15.9639	23.498	27.6545
ENSMUSG00000021392.7	Nol8	1659.49	0.791895	0.256689	3.08503	0.00203529	0.0252311	22.4263	14.724	25.9426	32.678
ENSMUSG00000062329.4	Cytl1	34.8516	-2.84211	0.921412	-3.08451	0.00203887	0.0252578	4.49713	4.11521	0.975969	0.155524
ENSMUSG00000052713.8	Zfp608	2295.6	-0.500478	0.162304	-3.08359	0.00204517	0.0253182	29.5796	27.1886	17.8191	19.0421
ENSMUSG00000031352.10	Hccs	1050.55	0.556854	0.180642	3.08264	0.00205175	0.025382	22.5686	23.1307	32.444	29.6028
ENSMUSG00000020561.7	Twistnb	1378.94	0.698005	0.226553	3.08098	0.00206318	0.0255057	31.5355	26.9208	37.5501	49.209
ENSMUSG00000021112.8	Mpp5	2670.82	0.731744	0.23764	3.07921	0.0020755	0.0256402	27.7476	19.4322	31.4425	40.0601
ENSMUSG00000030061.16	Uba3	2502.06	0.504509	0.163904	3.07808	0.00208336	0.0257193	63.3489	53.5061	75.3175	76.7257
ENSMUSG00000051579.10	Tceal8	6022.33	0.489289	0.159005	3.07719	0.0020896	0.0257785	253.359	260.209	317.27	346.158
ENSMUSG00000034981.9	Parm1	2035.06	-0.583242	0.189576	-3.07656	0.00209406	0.0258156	33.8896	28.3198	17.6647	20.383
ENSMUSG00000024064.13	Galnt14	44.9619	-2.18693	0.711013	-3.07579	0.00209942	0.0258638	1.95617	1.33488	0.470148	0.185537
ENSMUSG00000040929.16	Rfx3	1822.77	0.95794	0.311544	3.07481	0.00210636	0.0259312	11.4374	7.80832	12.6145	21.41
ENSMUSG00000000555.6	Itga5	2081.1	-0.56048	0.182351	-3.07364	0.00211468	0.0260156	38.9165	34.1978	25.3943	20.2444
ENSMUSG00000089715.11	Cbx6	1268.62	-0.725779	0.23617	-3.07312	0.00211834	0.0260426	32.4753	27.2061	19.8223	13.448
ENSMUSG00000027423.15	Snx5	9319.61	0.468652	0.15255	3.07212	0.00212547	0.0260978	227.645	242.348	295.155	304.014
ENSMUSG00000058966.13	Fam57b	40.9685	-2.05922	0.670301	-3.07208	0.00212576	0.0260978	1.50731	2.2258	0.491552	0.339492
ENSMUSG00000002603.15	Tgfb1	564.767	-0.842335	0.274317	-3.07066	0.00213586	0.0261913	21.5388	23.5186	14.0373	9.2474
ENSMUSG00000029163.9	Emilin1	3997.23	-0.556636	0.18128	-3.0706	0.00213632	0.0261913	83.639	78.5277	57.7141	43.9851
ENSMUSG00000046768.13	Rhoj	752.863	-0.724068	0.235943	-3.06882	0.00214904	0.0263291	25.4571	25.822	12.52	16.0506
ENSMUSG00000023039.16	Krt7	1763.17	0.744636	0.242713	3.06797	0.0021552	0.0263863	20.6327	26.8682	32.7337	40.7458
[truncated: 421 more rows]
